# Supplementary material for: Electrochemical 1,2-hydrogen atom transfer functionalizations of N-(benzyloxy)phthalimides
Source: Royal Society of Chemistry journal article supplement (doi:10.1039/d4qo01607f), 2024-01-01

## Supporting Information

### Electrochemical 1,2-hydrogen atom transfer functionalizations of *N*- (benzyloxy)phthalimides

Xin Fu,<sup>a</sup> Tingting Ran,<sup>a</sup> and Jie Liu<sup>\*ab</sup>

<sup>a</sup>*College of Chemistry and Chemical Engineering, State Key Laboratory of Chemo/Biosensing and Chemometrics, Hunan University, 410082, Changsha, China.*

<sup>b</sup>*Greater Bay Area Institute for Innovation, Hunan University, 511300, Guangzhou, China*

*E-mail: [jieliu@hnu.edu.cn](mailto:jieliu@hnu.edu.cn)*

#### Table of Content

|                                                                  |    |
|------------------------------------------------------------------|----|
| <b>1. General considerations</b> .....                           | 2  |
| <b>2. Preparation of substrates</b> .....                        | 2  |
| <b>3. Optimization of reaction conditions</b> .....              | 2  |
| <b>4. General procedure for electroreductive coupling.</b> ..... | 6  |
| <b>5. Gram-scale experiment</b> .....                            | 6  |
| <b>6. Mechanistic experiments</b> .....                          | 7  |
| <b>7. Characterization of products</b> .....                     | 10 |
| <b>8. References</b> .....                                       | 40 |
| <b>9. NMR spectra of products</b> .....                          | 41 |

## 1. General considerations

Unless otherwise noted, all reagents were used as received from the commercial suppliers. Flash chromatography was performed using 200-300 mesh SiliaFlash 60<sup>®</sup> silica gel (Silicycle Inc.). Reactions were monitored using thin-layer chromatography (TLC). TLC plates were visualized with UV light (254 nm) or KMnO<sub>4</sub> stain. Flash chromatography was carried out silica gel (200-300 mesh). <sup>1</sup>H, <sup>13</sup>C and <sup>19</sup>F NMR spectra were recorded on a Bruker Avance III HD NMR 400 MHz instrument, and are internally referenced to the residual proto-solvent signals (note: CDCl<sub>3</sub> referenced at 7.26 ppm and 77.0 ppm, respectively). Data for <sup>1</sup>H are reported as: chemical shift (δ ppm), integration, multiplicity (s: singlet, d: doublet, t: triplet, m: multiplet, br: broad peak), coupling constant (Hz) and assignment. HRMS were recorded using ESI-TOF techniques. All measurements were carried out at room temperature unless otherwise stated.

## 2. Preparation of substrates

### 2.1 Preparation of *N*-(benzyloxy)phthalimides

*N*-(Benzyloxy)phthalimides were prepared according to the reported procedure.<sup>1</sup>

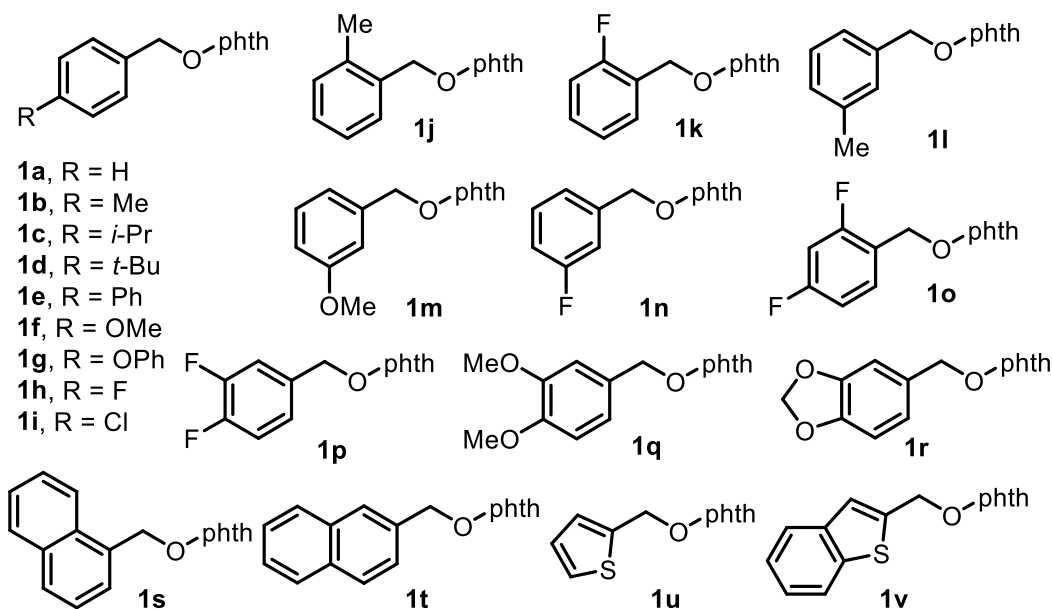

## 3. Optimization of reaction conditions

**Table S1: Optimization of solvent for hydroxyalkylation**

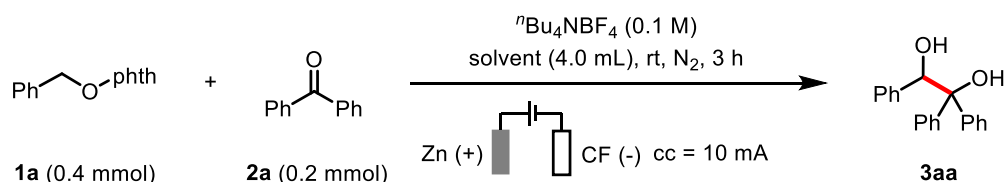

| Entry | Solvent | Yield of <b>3aa</b> (%) <sup>a</sup> |
|-------|---------|--------------------------------------|
| 1     | DMSO    | 28                                   |
| 2     | DMAc    | 31                                   |
| 3     | DMF     | 28                                   |
| 4     | MeCN    | 16                                   |
| 5     | Acetone | trace                                |
| 6     | MeOH    | trace                                |

<sup>a</sup>Determined by <sup>1</sup>H-NMR analysis of reaction crude mixture with dibromomethane as the internal standard.

**Table S2: Optimization of electrode for hydroxyalkylation**

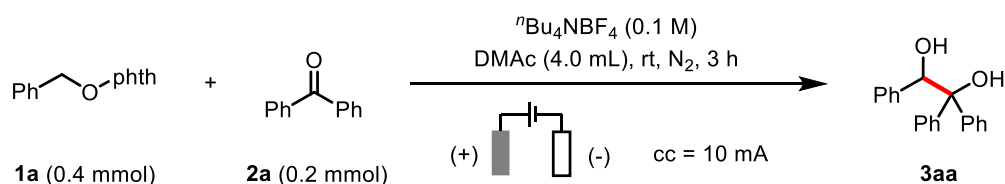

| Entry          | Anode (+) | Cathode (-) | Yield of <b>3aa</b> (%) <sup>a</sup> |
|----------------|-----------|-------------|--------------------------------------|
| 1              | Zn        | Pt          | 19                                   |
| 2              | Zn        | C plate     | 17                                   |
| 3              | Zn        | CF          | 31                                   |
| 4              | Zn        | Ni foam     | 23                                   |
| 5 <sup>b</sup> | Zn        | CF          | 29                                   |
| 6              | Mg        | CF          | 48                                   |
| 7              | Al        | CF          | trace                                |
| 8              | SS        | CF          | trace                                |

<sup>a</sup>Determined by <sup>1</sup>H-NMR analysis of reaction crude mixture with dibromomethane as the internal standard. <sup>b</sup>Reaction time: 4.5 h.

**Table S3: Optimization of current for hydroxyalkylation**

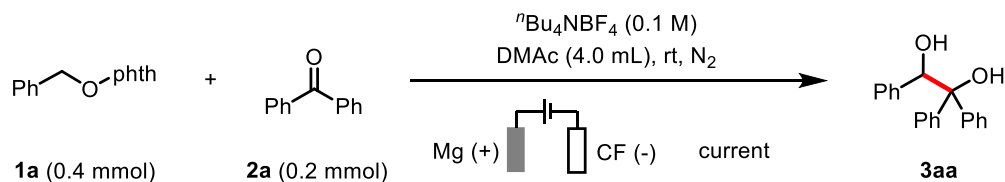

| Entry | Current (mA) | Time (h) | Yield of <b>3aa</b> (%) <sup>a</sup> |
|-------|--------------|----------|--------------------------------------|
| 1     | 6            | 6        | 66                                   |
| 2     | 8            | 3.75     | 78                                   |
| 3     | 10           | 2.5      | 62                                   |
| 4     | 15           | 2        | 53                                   |
| 5     | 8            | 3        | 52                                   |
| 6     | 8            | 5        | 57                                   |

<sup>a</sup>Determined by <sup>1</sup>H-NMR analysis of reaction crude mixture with dibromomethane as the internal standard.

**Table S4: Optimization of electrolyte for hydroxyalkylation**

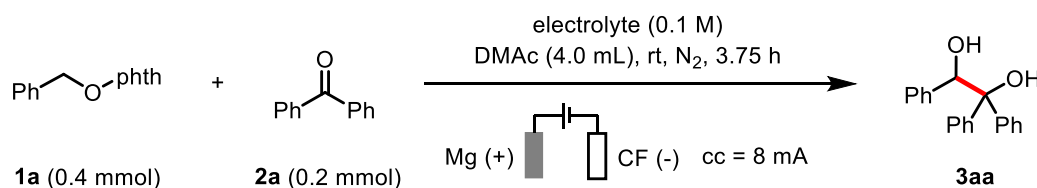

| Entry | Electrolyte                                   | Yield of <b>3aa</b> (%) <sup>a</sup> |
|-------|-----------------------------------------------|--------------------------------------|
| 1     | <sup>n</sup> Bu <sub>4</sub> NPF <sub>6</sub> | trace                                |
| 2     | <sup>n</sup> Bu <sub>4</sub> NI               | 47                                   |
| 3     | <sup>n</sup> Bu <sub>4</sub> NBr              | 30                                   |
| 4     | <sup>n</sup> Bu <sub>4</sub> NCl              | 37                                   |
| 5     | <sup>n</sup> Bu <sub>4</sub> NOAc             | 8                                    |
| 6     | Et <sub>4</sub> NCl                           | 45                                   |
| 7     | LiOTf                                         | trace                                |
| 8     | LiCl                                          | trace                                |

<sup>a</sup>Determined by <sup>1</sup>H-NMR analysis of reaction crude mixture with dibromomethane as the internal standard.

**Table S5: Screening of different conditions for hydroxyalkylation**

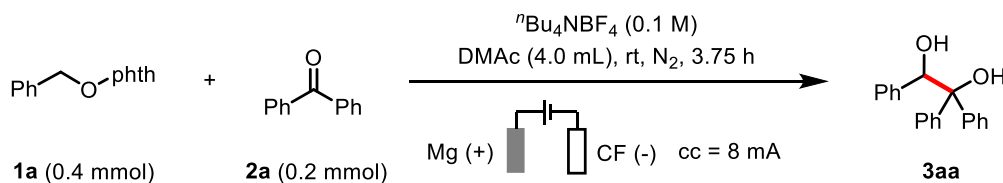

| Entry | Variation                                  | Yield of <b>3aa</b> (%) <sup>a</sup> |
|-------|--------------------------------------------|--------------------------------------|
| 1     | 3.0 mL, 5.0 mL                             | 51, 57                               |
| 2     | <b>1a</b> (0.2 mmol), <b>2a</b> (0.4 mmol) | 61                                   |
| 3     | <b>1a</b> (0.6 mmol), <b>2a</b> (0.2 mmol) | 68                                   |
| 4     | anhydrous DMAc                             | 58                                   |
| 5     | air                                        | trace                                |
| 6     | no electric current                        | n.d.                                 |

<sup>a</sup>Determined by <sup>1</sup>H-NMR analysis of reaction crude mixture with dibromomethane as the internal standard.

**Table S6: Screening of different conditions for arylation**

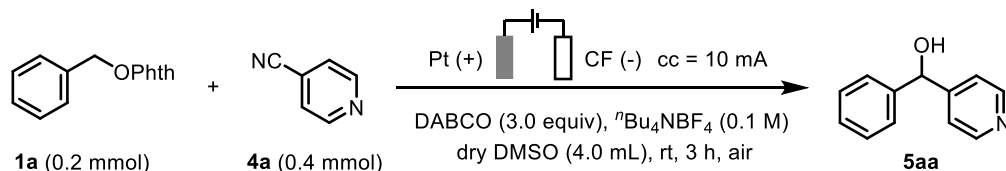

| Entry | Variation                                                                                                                                                                                 | Yield of <b>5aa</b> (%) <sup>a</sup> |
|-------|-------------------------------------------------------------------------------------------------------------------------------------------------------------------------------------------|--------------------------------------|
| 1     | none                                                                                                                                                                                      | 76 <sup>b</sup>                      |
| 2     | <sup>n</sup> Bu <sub>4</sub> NCIO <sub>4</sub> , <sup>n</sup> Bu <sub>4</sub> NPF <sub>6</sub> , <sup>n</sup> Bu <sub>4</sub> NI instead of <sup>n</sup> Bu <sub>4</sub> NBF <sub>4</sub> | 21, 19, trace                        |

|   |                                                       |                |
|---|-------------------------------------------------------|----------------|
| 3 | CF instead of Pt (+)                                  | trace          |
| 4 | C plate, Pt, Ni foam instead of CF (-)                | 20, 27, 19     |
| 5 | DMF, MeCN, Acetone, wet DMSO instead of dry DMSO      | 39, 20, 26, 56 |
| 6 | <sup>n</sup> Bu <sub>4</sub> NBF <sub>4</sub> (0.2 M) | 41             |
| 7 | <b>1a</b> (0.4 mmol), <b>4a</b> (0.2 mmol)            | 66             |
| 8 | N <sub>2</sub> instead of air                         | 45             |

<sup>a</sup>Determined by <sup>1</sup>H-NMR analysis of reaction crude mixture with dibromomethane as the internal standard. <sup>b</sup>Isolated yield.

**Table S7: Other substrates for hydroxyalkylation**

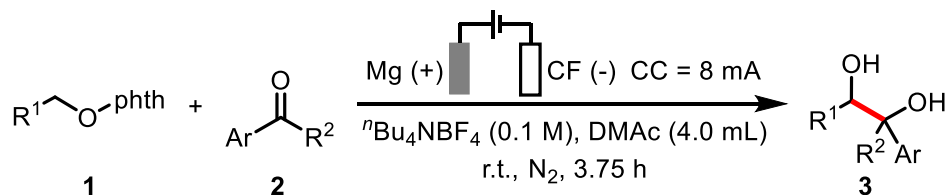

| Entry | <b>1</b> | <b>2</b> | <b>3</b>         |
|-------|----------|----------|------------------|
| 1     |          |          | <br>not observed |
| 2     |          |          | <br>not observed |
| 3     |          |          | <br>not observed |
| 4     |          |          | <br>8% yield     |

<sup>a</sup>Reaction conditions: undivided cell, magnesium (Mg) anode, carbon felt (CF) cathode, constant current = 8 mA, **1** (2 equiv.), **2** (0.2 mmol), <sup>n</sup>Bu<sub>4</sub>NBF<sub>4</sub> (2 equiv.), DMAc (4 mL), N<sub>2</sub>, r.t., 3.75 h.

**Table S8: Other substrates for arylation**

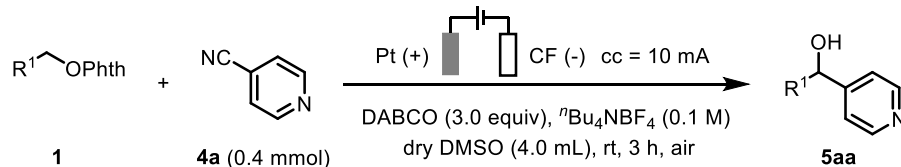

the unsuccessful substrates **1**

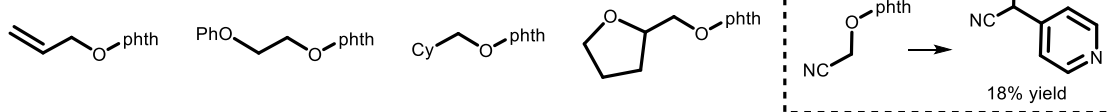

<sup>a</sup>Reaction conditions: undivided cell, platinum plate (Pt) anode, carbon felt (CF) cathode, constant current = 10 mA, **1** (0.2 mmol), **4a** (0.4 mmol), <sup>n</sup>Bu<sub>4</sub>NBF<sub>4</sub> (2 equiv.), DABCO (3.0

equiv.), dry DMSO (4 mL), r.t., 3 h.

#### 4. General procedure for electroreductive coupling.

##### Hydroxyalkylation:

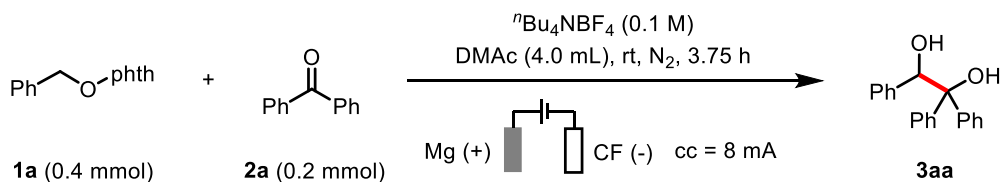

A 10 mL tube equipped with a magnetic stirring bar was charged with *N*-(benzyloxy)phthalimide **1a** (0.4 mmol, 2.0 equiv.), benzophenone **2a** (0.2 mmol, 1.0 equiv.),  ${}^n\text{Bu}_4\text{NBF}_4$  (0.4 mmol, 2.0 equiv.) and DMAc (4.0 mL) were added. The reactor was equipped with magnesium (Mg) electrode (20×10×0.5 mm) as the anode and carbon felt (CF) electrode (20×10×4 mm) as the cathode. After that, the mixture was electrolyzed under a constant current of 8 mA at room temperature for 3.75 h. After reaction was completed, the reaction solvent was diluted with 20 mL ethyl acetate, washed with  $\text{H}_2\text{O}$  for three times, dried over  $\text{Na}_2\text{SO}_4$  and organic layers were combined and concentrated *in vacuo*. The resulting residue was purified by silica gel flash chromatography to give the products.

##### Arylation:

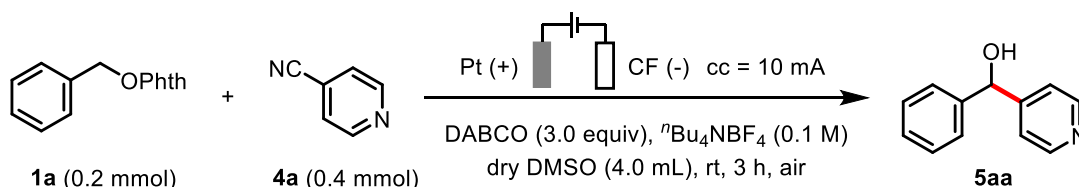

A dried 10 mL tube equipped with a magnetic stirring bar was charged with *N*-(benzyloxy)phthalimide **1a** (50.6 mg, 0.2 mmol, 1.0 equiv.), 4-cyanopyridine **4a** (41.6 mg, 0.4 mmol, 2.0 equiv.), DABCO (0.6 mmol, 3.0 equiv.),  ${}^n\text{Bu}_4\text{NBF}_4$  (0.4 mmol, 2.0 equiv.) and anhydrous DMSO (4.0 mL) were added. The reactor was equipped with Platinum electrode (20×10×0.2 mm, from TCI) as the anode and carbon felt (CF) electrode (20×10×4 mm, from Cetech) as the cathode. Then, the mixture was electrolyzed under a constant current of 10 mA for 3 h at room temperature. After reaction was completed, the reaction solvent was diluted with 20 mL ethyl acetate, washed with  $\text{H}_2\text{O}$  for three times, dried over  $\text{Na}_2\text{SO}_4$  and organic layers were combined and concentrated *in vacuo*. The resulting residue was purified by silica gel flash chromatography to give the products.

#### 5. Gram-scale experiment

## Hydroxyalkylation:

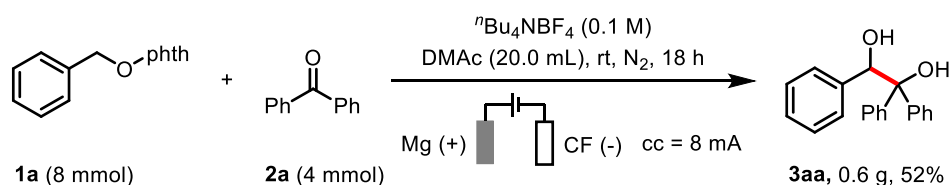

A 50 mL flask equipped with a magnetic stirring bar was charged with *N*-(benzyloxy)phthalimide **1a** (2.02 g, 8 mmol, 1.5 equiv.), benzophenone **2a** (0.728 g, 4 mmol, 1.0 equiv.),  $\text{tBu}_4\text{NBF}_4$  (2 mmol, 0.5 equiv.) and DMAc (20.0 mL) were added. The reactor was equipped with magnesium (Mg) electrode (20×20×0.5 mm) as the anode and carbon felt (CF) electrode (20×20×4 mm) as the cathode. After that, the mixture was electrolyzed under a constant current of 8 mA at room temperature for 18 h. After reaction was completed, the reaction solvent was diluted with 100 mL ethyl acetate, washed with  $\text{H}_2\text{O}$  for three times, dried over  $\text{Na}_2\text{SO}_4$  and organic layers were combined and concentrated *in vacuo*. The resulting residue was purified by silica gel flash chromatography to give the products.

## Arylation:

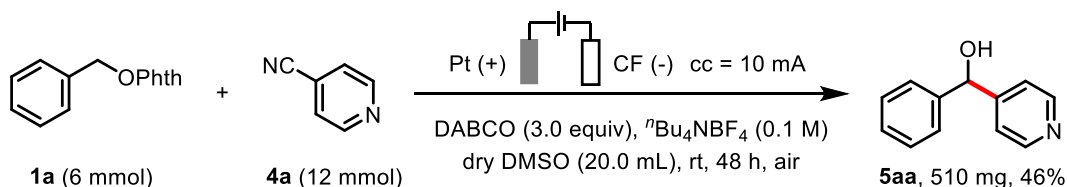

An oven-dried 50 mL flask equipped with a magnetic stirring bar was charged with *N*-(benzyloxy)phthalimide **1a** (1.52 g, 6 mmol, 1.0 equiv.), 4-cyanopyridine **4a** (1.21 g, 12 mmol, 2.0 equiv.), DABCO (6 mmol, 3.0 equiv.),  $\text{tBu}_4\text{NBF}_4$  (12 mmol, 2.0 equiv.) and anhydrous DMSO (20.0 mL) were added. The reactor was equipped with Platinum electrode (20×10×0.2 mm, from TCI) as the anode and carbon felt (CF) electrode (20×10×4 mm, from Cetech) as the cathode. The mixture was electrolyzed under a constant current of 10 mA for 48 h at room temperature. After reaction was completed, the reaction solvent was diluted with 100 mL ethyl acetate, washed with  $\text{H}_2\text{O}$  for three times, dried over  $\text{Na}_2\text{SO}_4$  and organic layers were combined and concentrated *in vacuo*. The resulting residue was purified by silica gel flash chromatography to give the products.

## 6. Mechanistic experiments

### 6.1 Radical scavenger tests

**Table S9.** Effect of radical scavengers on the hydroxyalkylation<sup>a</sup>

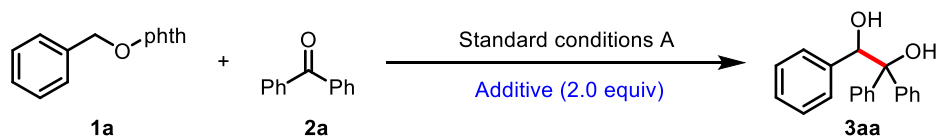

| Entry | Additive             | Yield of <b>3aa</b> <sup>b</sup> |
|-------|----------------------|----------------------------------|
| 1     | TEMPO                | 22%                              |
| 2     | BHT                  | 76%                              |
| 3     | 1,1-Diphenylethylene | 72%                              |

<sup>a</sup>Reactions were carried out on 0.2 mmol scale with a 2:1 ratio of **1a**:**2a**. <sup>b</sup>Conversion and yield determined by <sup>1</sup>H-NMR analysis of reaction crude mixture with dibromomethane as the internal standard.

**Table S10.** Effect of radical scavengers on the arylation<sup>a</sup>

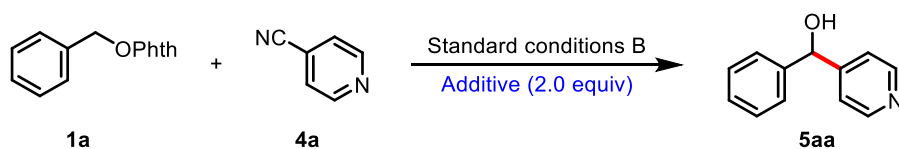

| Entry | Additive             | Yield of <b>5aa</b> <sup>b</sup> |
|-------|----------------------|----------------------------------|
| 1     | TEMPO                | trace                            |
| 2     | BHT                  | trace                            |
| 3     | 1,1-Diphenylethylene | 48%                              |

<sup>a</sup>Reactions were carried out on 0.2 mmol scale with a 1:2 ratio of **1a**:**4a**. <sup>b</sup>Conversion and yield determined by <sup>1</sup>H-NMR analysis of reaction crude mixture with dibromomethane as the internal standard.

## 6.2 Excluding aldehyde/alcohol as the reaction intermediate

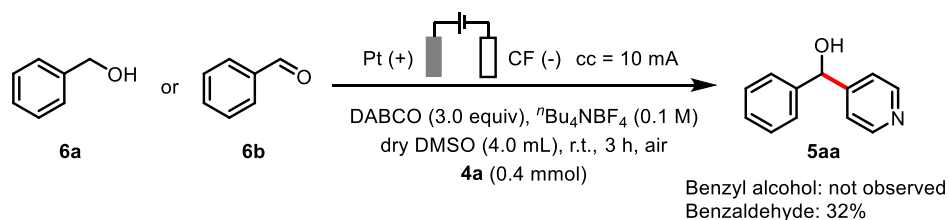

Following the standard procedure, the application of benzyl alcohol **6a** (21.6 mg, 0.2 mmol) instead of *N*-alkoxyphthalimide **1a** led to no arylation product **5aa**. The reaction of **6b** (21.2 mg, 0.2 mmol) and **4a** (75.6 mg, 0.4 mmol) afforded the product **5aa** in 32% yield.

## 6.3 The evidence of the presence of alkoxy radicals



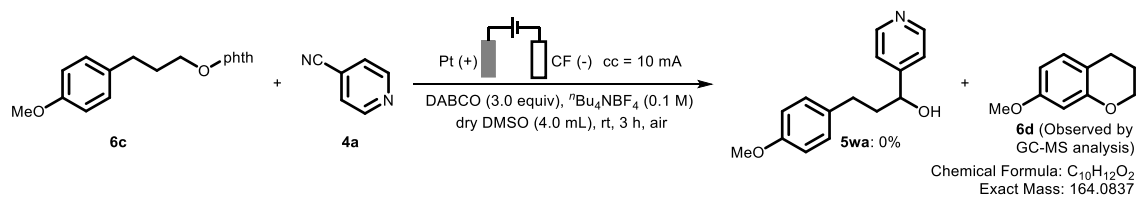

GC-MS dates of **6d**:

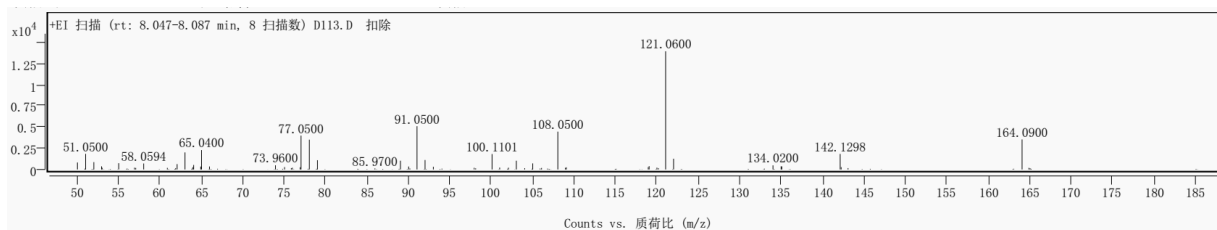

[MS Spectrum]

m/z, Absolute Intensity, Relative Intensity

|                 |             |              |                 |              |               |          |      |       |
|-----------------|-------------|--------------|-----------------|--------------|---------------|----------|------|-------|
| 50.0602         | 824         | 5.91         | 51.0500         | 1839         | 13.19         | 52.0400  | 867  | 6.21  |
| 52.9700         | 365         | 2.62         | 53.0400         | 201          | 1.44          | 55.0400  | 741  | 5.32  |
| 56.0500         | 104         | 0.75         | 56.9502         | 208          | 1.49          | 57.1000  | 178  | 1.28  |
| 58.0594         | 705         | 5.06         | 60.9100         | 189          | 1.36          | 61.9100  | 155  | 1.11  |
| 62.0900         | 631         | 4.52         | 63.0400         | 2016         | 14.46         | 63.9800  | 259  | 1.85  |
| 64.0900         | 532         | 3.82         | 64.9400         | 341          | 2.45          | 65.0400  | 2288 | 16.41 |
| 66.0000         | 349         | 2.50         | 73.9600         | 493          | 3.54          | 75.0600  | 279  | 2.00  |
| 75.8705         | 148         | 1.06         | 76.0000         | 207          | 1.48          | 76.9481  | 258  | 1.85  |
| 77.0500         | 3996        | 28.66        | 78.0500         | 3519         | 25.23         | 79.0300  | 1096 | 7.86  |
| 85.9700         | 127         | 0.91         | 89.0500         | 1034         | 7.41          | 90.0400  | 344  | 2.47  |
| 90.1900         | 114         | 0.82         | 91.0500         | 5104         | 36.61         | 92.0200  | 1116 | 8.00  |
| 93.0200         | 319         | 2.29         | 97.9498         | 193          | 1.38          | 98.1300  | 136  | 0.97  |
| 100.1101        | 1819        | 13.04        | 101.0292        | 223          | 1.60          | 102.0900 | 209  | 1.50  |
| 103.0400        | 1035        | 7.42         | 104.0500        | 150          | 1.08          | 105.0200 | 717  | 5.14  |
| 105.9100        | 110         | 0.79         | 106.0800        | 176          | 1.26          | 106.8200 | 101  | 0.73  |
| 108.0500        | 4461        | 32.00        | 108.9600        | 193          | 1.39          | 109.0800 | 247  | 1.77  |
| 118.9600        | 278         | 1.99         | 119.0700        | 387          | 2.77          | 120.0100 | 215  | 1.54  |
| 120.1900        | 155         | 1.11         | <b>121.0600</b> | <b>13944</b> | <b>100.00</b> | 122.0200 | 1265 | 9.07  |
| 134.0200        | 489         | 3.51         | 135.0000        | 363          | 2.60          | 135.0798 | 355  | 2.54  |
| 142.1298        | 1831        | 13.13        | 142.2496        | 274          | 1.97          | 143.0793 | 156  | 1.12  |
| <b>164.0900</b> | <b>3542</b> | <b>25.40</b> | 164.9100        | 186          | 1.34          | 165.0600 | 143  | 1.02  |

### Scheme S1. The arylation with *N*-alkoxyipyridium salt

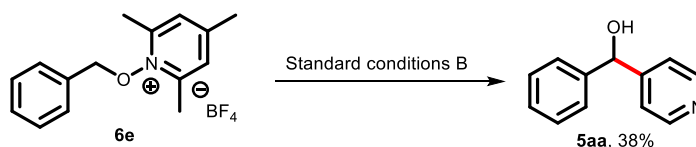

A dried 10 mL tube equipped with a magnetic stirring bar was charged with *N*-alkoxyipyridinium salt derivative **6e** (0.2 mmol, 1.0 equiv.), 4-cyanopyridine **4a** (41.6 mg, 0.4 mmol, 2.0 equiv.), DABCO (0.6 mmol, 3.0 equiv.),  $n\text{Bu}_4\text{NBF}_4$  (0.4 mmol, 2.0 equiv.) and anhydrous DMSO (4.0 mL) were added. The reactor was equipped with Platinum electrode (20×10×0.2 mm, from TCI) as the anode and carbon felt (CF) electrode (20×10×4 mm, from Cetech) as the cathode. Then, the mixture was electrolyzed under a constant current of 10 mA for 3 h at room temperature. After reaction was completed, the reaction solvent was diluted with 20 mL ethyl acetate, washed with H<sub>2</sub>O for three times, dried over Na<sub>2</sub>SO<sub>4</sub> and organic layers were combined and concentrated *in vacuo*. The resulting residue was purified by silica gel flash chromatography to give the products.

### 6.4 The cross-over experiments

#### Hydroxyalkylation:

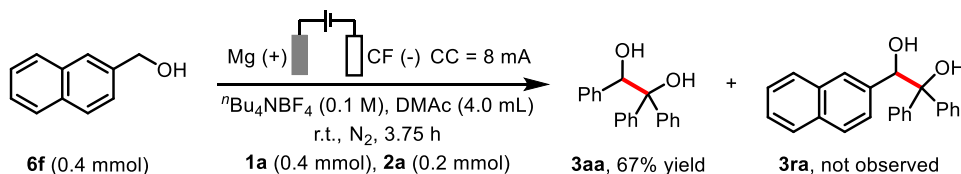

Following the standard procedure, the reaction of **6f** (26.7 mg, 0.4 mmol) for 3.75 h afforded the hydroxyalkylation product **3aa** in 67% yield and no occurrence of **3ra** from the crude <sup>1</sup>H-NMR spectra.

| TLC (PE:EA = 5:1, twice) | 1 | 2          | 3               | 4          | Recovery of <b>6f</b> |     |
|--------------------------|---|------------|-----------------|------------|-----------------------|-----|
|                          |   | <b>3aa</b> | reaction system | <b>3ra</b> | <b>6f</b>             | 82% |

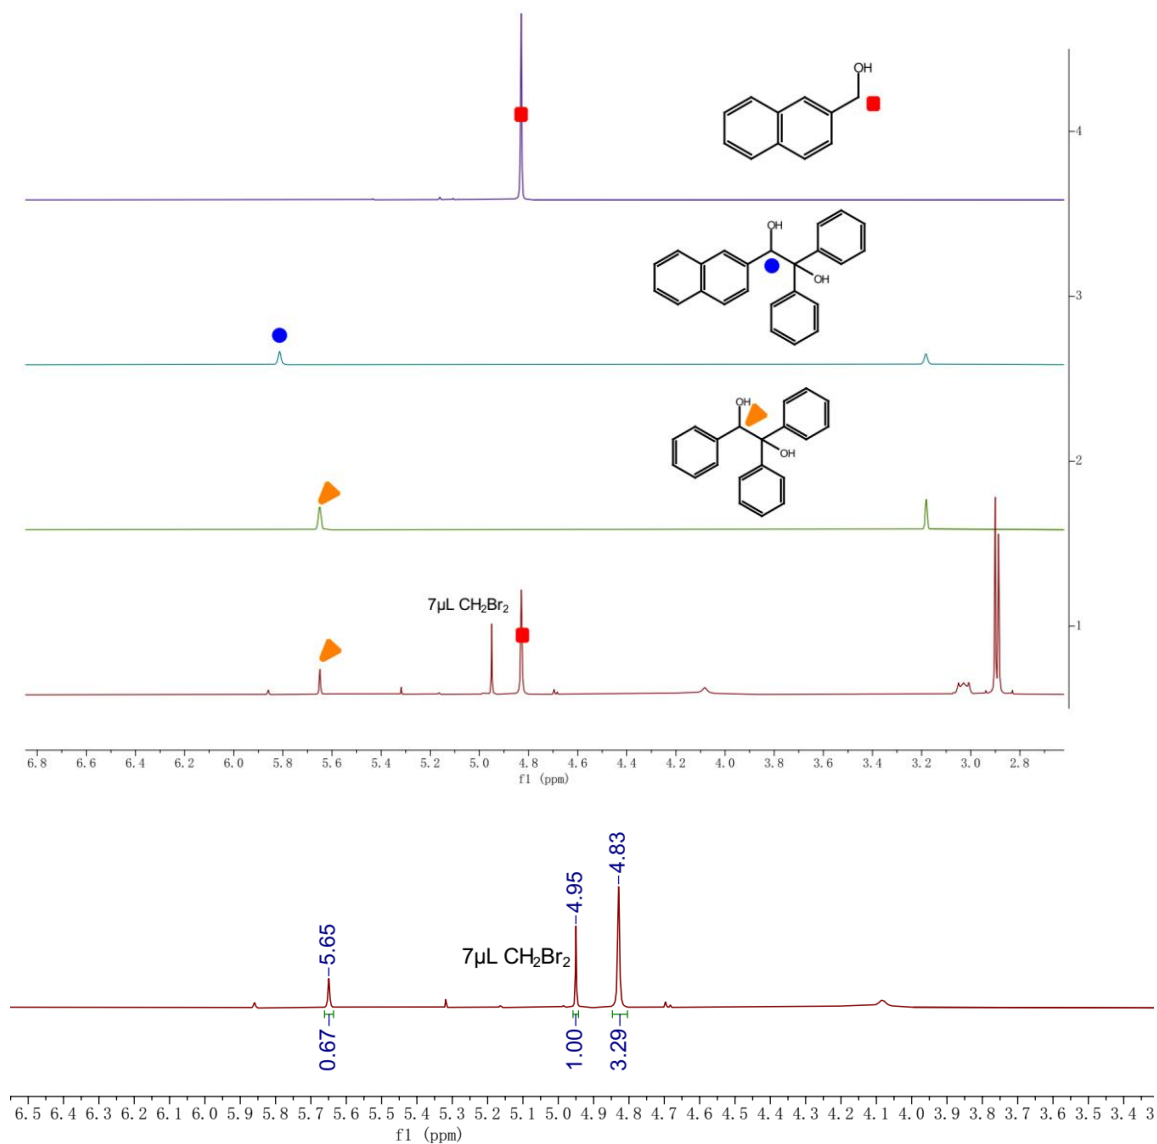

**Figure S1.** The  $^1\text{H-NMR}$  spectra of the hydroxyalkylation.

**Arylation:**

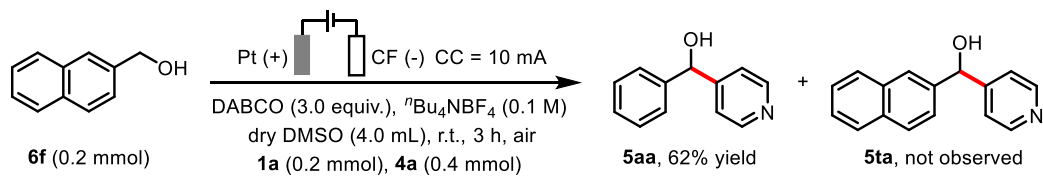

| TLC (PE:EA = 1:1) | 1 | 2          | 3               | 4                    | Recovery of <b>6f</b> |
|-------------------|---|------------|-----------------|----------------------|-----------------------|
|                   |   | <b>5aa</b> | reaction system | <b>5ta</b> <b>6f</b> | 96%                   |

Following the standard procedure, the reaction of **6f** (13.4 mg, 0.2 mmol) for 3 h afforded

the arylation product **5aa** in 62% yield and no occurrence of **5ta** from the crude  $^1\text{H-NMR}$  spectra.

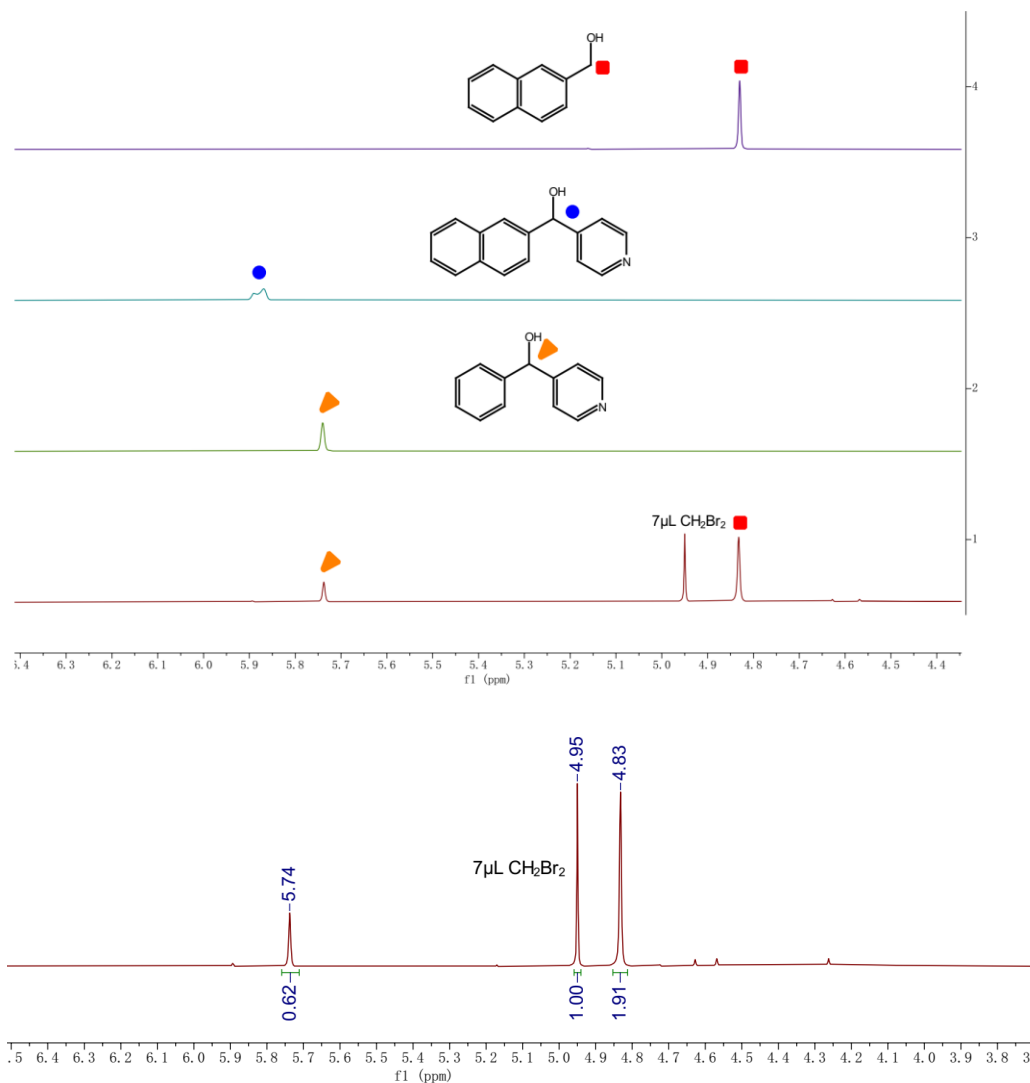

**Figure S2.** The  $^1\text{H-NMR}$  spectra of the arylation.

## 6.5 EPR experiments and data<sup>2</sup>

General procedure for EPR studies:

A dried 10 mL tube equipped with a magnetic stirring bar, **1a** (101 mg, 0.4 mmol),  $^n\text{Bu}_4\text{NBF}_4$  (132 mg, 0.4 mmol), DMPO (45  $\mu\text{L}$ , 0.4 mmol, 1.0 equiv) and dry MeCN (4 mL) (bubbled with nitrogen gas for 30 seconds to remove oxygen) were added. The reactor was equipped with magnesium (Mg) electrode (20 $\times$ 10 $\times$ 0.5 mm) as the anode and carbon felt (CF) electrode (20 $\times$ 10 $\times$ 4 mm) as the cathode. Under atmospheric nitrogen, the reaction mixture was stirred and electrolyzed at a constant current of 8 mA under room temperature for 20 minutes.

The solution sample was taken out into a small tube for EPR test.

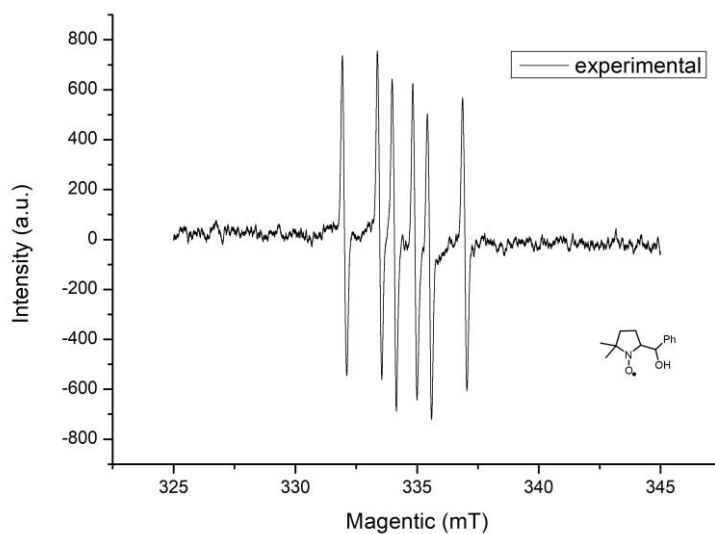

**Figure S3.** EPR measurements.

EPR spectra were measured on a JES-FA 200 spectrometer. EPR spectra was recorded at room temperature on EPR spectrometer operated at 9.191 GHz. Typical spectrometer parameters were shown as follows, sweep width: 100 G; center field set: 3350 G; time constant: 30 ms; sweep time: 30.00 s; modulation frequency: 100 kHz; microwave power: 1.00 mW. The adduct DMPO-CH **7b** was observed in the mixture of DMPO and *N*-(benzyloxy)phthalimide **1a**, showing a standard six-line spectrum ( $g = 2.00621$ ,  $A_N = 14.6$  G,  $A_H = 20.5$  G).

General procedure for EPR studies:

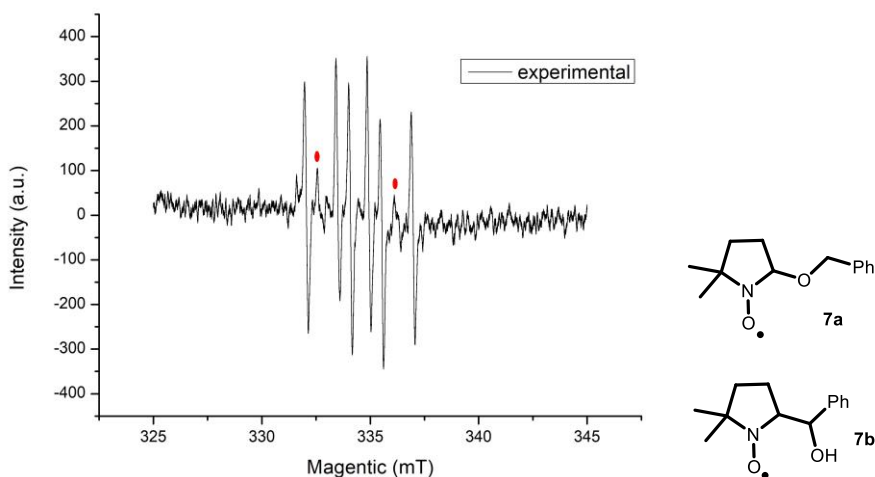

**Figure S4.** EPR measurements.

A dried 10 mL tube equipped with a magnetic stirring bar, **1a** (101 mg, 0.4 mmol),

$n\text{Bu}_4\text{NBF}_4$  (132 mg, 0.4 mmol), DMPO (45  $\mu\text{L}$ , 0.4 mmol, 1.0 equiv) and dry DMAc (4 mL) were added. The reactor was equipped with magnesium (Mg) electrode (20 $\times$ 10 $\times$ 0.5 mm) as the anode and carbon felt (CF) electrode (20 $\times$ 10 $\times$ 4 mm) as the cathode. Under atmospheric nitrogen, the reaction mixture was stirred and electrolyzed at a constant current of 8 mA under room temperature for 20 minutes. The solution sample was taken out into a small tube for EPR test.

EPR spectra were measured on a JES-FA 200 spectrometer. EPR spectra was recorded at room temperature on EPR spectrometer operated at 9.191 GHz. Typical spectrometer parameters were shown as follows, sweep width: 100 G; center field set: 3350 G; time constant: 30 ms; sweep time: 30.00 s; modulation frequency: 100 kHz; microwave power: 1.00 mW. The mixture of adduct DMPO-OCH **7a** and adduct DMPO-CH **7b**,  $g = 2.00602$ .

### 6.6 The arylation with 2- or 3-cyanopyridine

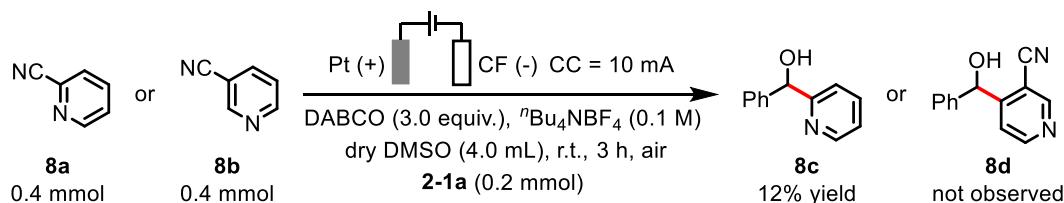

Following the standard procedure, the reaction of **8a** or **8b** for 3 h afforded the arylation product **8c** in 12% yield from the crude  $^1\text{H-NMR}$  spectra and no occurrence of **8d** by TLC and GC-MS analysis.

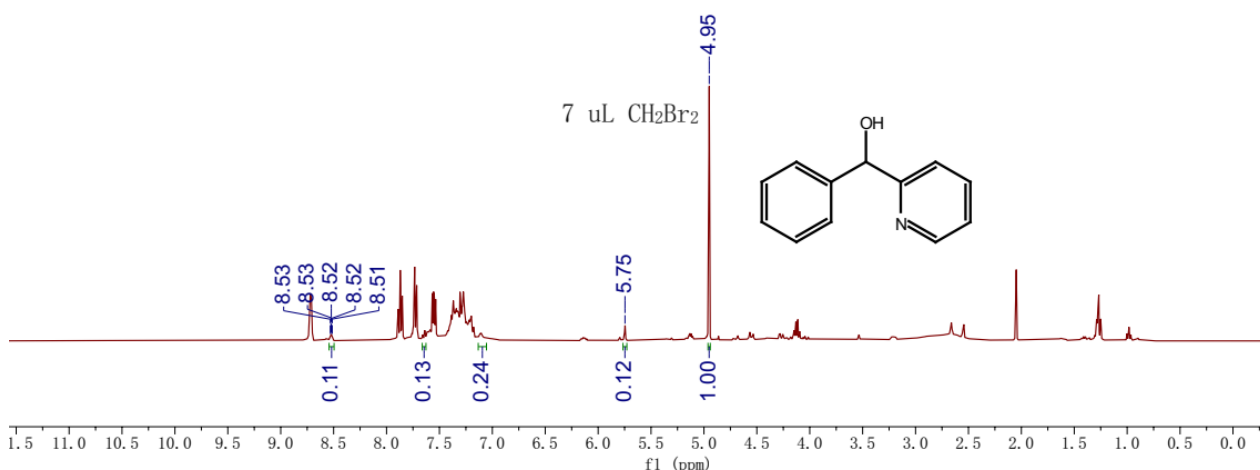

**Figure S5.** The  $^1\text{H-NMR}$  spectra of the arylation product **8c**.

### 6.7 Cyclic voltammetry experiments

Cyclic voltammetry was recorded using a CHI660E potentiostat at room temperature. A glassy carbon electrode (3 mm diameter, Ledonlab), Pt wire (0.5 mm diameter, Ledonlab), and

Ag/AgCl (in saturated potassium chloride) were used as the working, counter, and reference electrodes, respectively. Prior to the experiment, glassy carbon electrode was polished using 0.2-1.0  $\mu\text{m}$   $\alpha\text{-Al}_2\text{O}_3$  polishing powder. All experiments were sparged with argon for 5 minutes before data collection. Unless otherwise noted, scan rate = 100 mV/s.

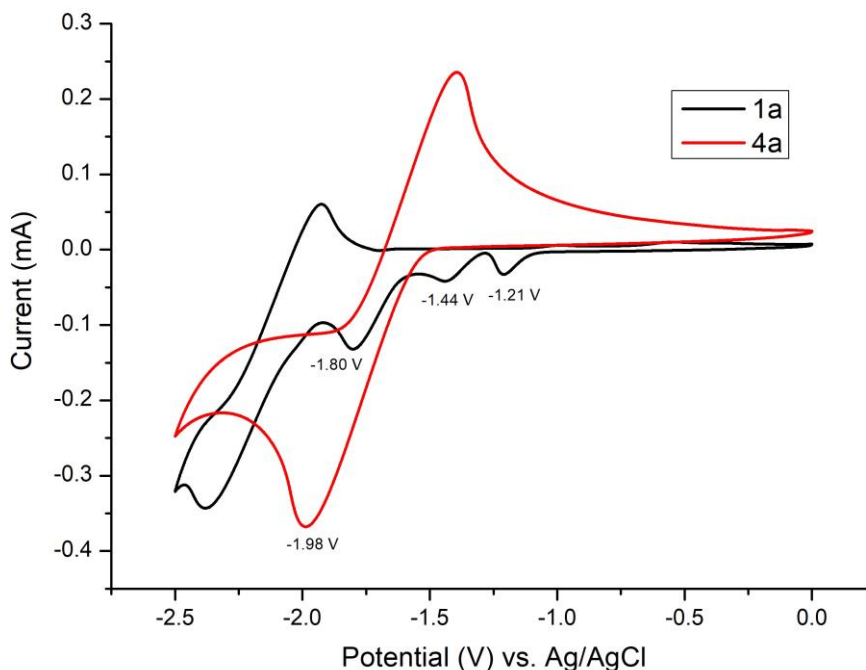

**Figure S6.** The cyclic voltammetry of *N*-alkoxyphthalimide **1a** (reduction peak at - 1.21 V, - 1.44 V, -1.80 V vs. Ag/AgCl) and 4-cyanopyridine **4a** (reduction peak at - 1.98 V vs. Ag/AgCl).

## 6.8 Controlled potential electrolysis

**Table S11.** Controlled potential electrolysis

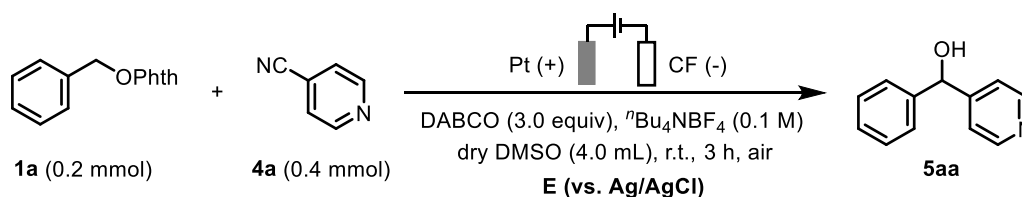

| Entry | E (vs. Ag/AgCl) | Yield of <b>5aa</b> (%) <sup>a</sup> |
|-------|-----------------|--------------------------------------|
| 1     | -1.8 V          | trace                                |
| 2     | -1.88 V         | trace                                |
| 3     | -2.2 V          | 48                                   |

<sup>a</sup>Determined by <sup>1</sup>H-NMR analysis of reaction crude mixture with dibromomethane as the internal standard.

Controlled potential electrolysis was proceeded using a CHI660E potentiostat. A dried 10 mL tube equipped with a magnetic stirring bar was charged with *N*-(benzyloxy)phthalimide **1a** (50.6 mg, 0.2 mmol, 1.0 equiv.), 4-cyanopyridine **4a** (41.6 mg, 0.4 mmol, 2.0 equiv.), DABCO (0.6 mmol, 3.0 equiv.), <sup>n</sup>Bu<sub>4</sub>NBF<sub>4</sub> (0.4 mmol, 2.0 equiv.) and anhydrous DMSO (4.0 mL) were added. A Platinum electrode (20×10×0.2 mm, from TCI), carbon felt (CF) electrode (20×10×4 mm, from Cetech) and Ag/AgCl (in saturated potassium chloride) were used as the counter, working, and reference electrodes, respectively. Then the mixture was respectively electrolyzed under a constant voltage (vs. Ag/AgCl) - 1.80 V and - 1.88 V. After reaction was completed, the reaction solvent was diluted with 20 mL ethyl acetate, washed with H<sub>2</sub>O for three times, dried over Na<sub>2</sub>SO<sub>4</sub> and organic layers were combined and concentrated *in vacuo*. The yield of the product **5aa** was determined by <sup>1</sup>H-NMR analysis of the reaction crude mixture with dibromomethane as the internal standard.

## 6.9 KIE experiments

**Table S12. The KIE experiments of the hydroxyalkylation**

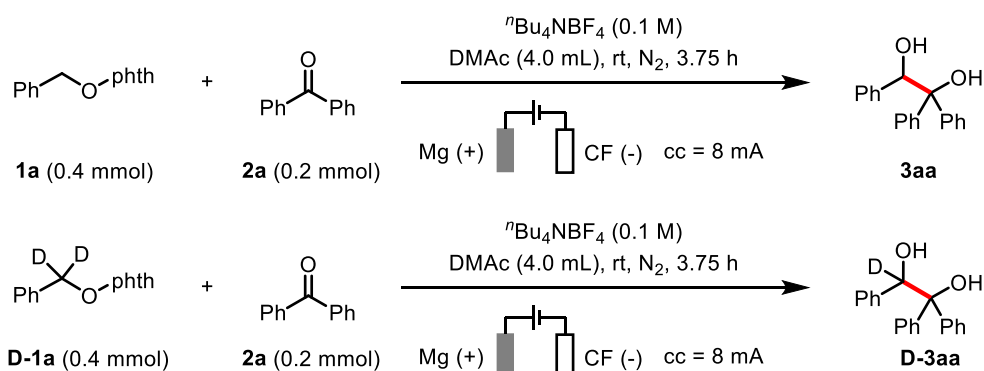

| Entry | Reaction Time (min) | Yield of <b>3aa</b> (%) <sup>a</sup> | Yield of <b>D-3aa</b> (%) <sup>a</sup> |
|-------|---------------------|--------------------------------------|----------------------------------------|
| 1     | 30                  | 4                                    | 3                                      |
| 2     | 40                  | 10                                   | 13                                     |
| 3     | 50                  | 13                                   | 16                                     |
| 4     | 60                  | 16                                   | 19                                     |

<sup>a</sup>Determined by <sup>1</sup>H-NMR analysis of reaction crude mixture with dibromomethane as the internal standard.



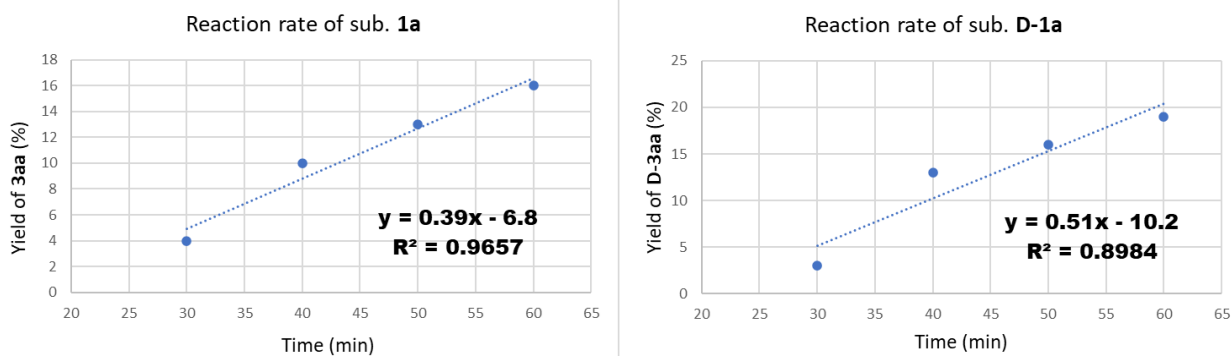

**Figure S7.** The deuterium labeling experiments of the hydroxyalkylation: The KIE value was calculated as  $K_H/K_D = 0.39/0.51 = 0.76$ , suggesting that the cleavage of the  $\alpha$ -C(sp<sup>3</sup>)-H bond was not the rate-determining step.

**Table S13.** The KIE experiments of the arylation

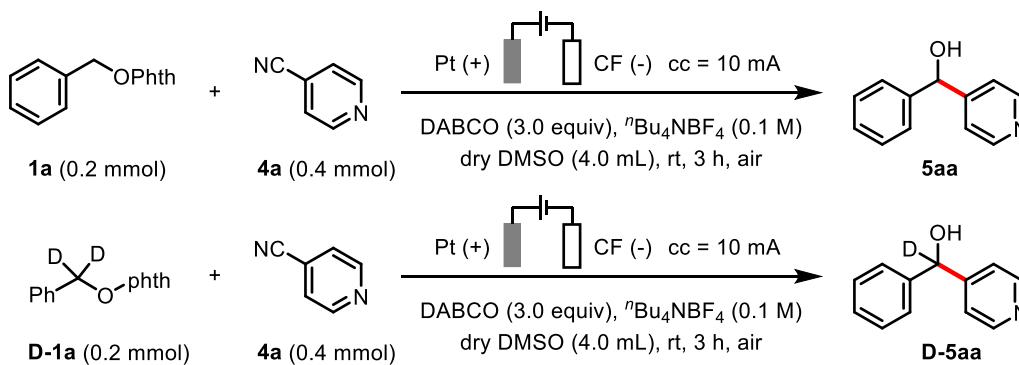

| Entry | Reaction Time (min) | Yield of <b>5aa</b> (%) <sup>a</sup> | Yield of <b>D-5aa</b> (%) <sup>a</sup> |
|-------|---------------------|--------------------------------------|----------------------------------------|
| 1     | 20                  | 6                                    | 8                                      |
| 2     | 30                  | 10                                   | 12                                     |
| 3     | 40                  | 15                                   | 15                                     |
| 4     | 50                  | 18                                   | 19                                     |

<sup>a</sup>Determined by <sup>1</sup>H-NMR analysis of reaction crude mixture with dibromomethane as the internal standard.

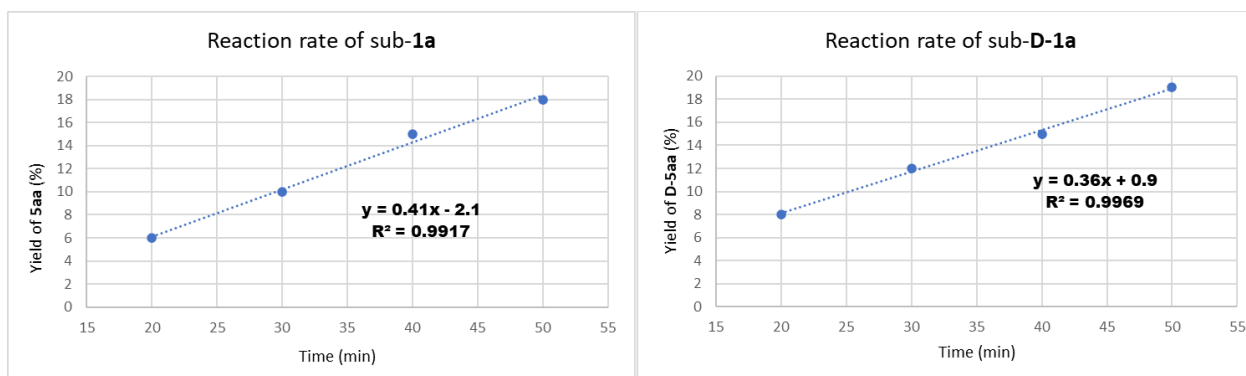

**Figure S8.** The deuterium labeling experiments of the arylation: The KIE value was calculated

as  $K_H/K_D = 0.41/0.36 = 1.14$ , suggesting that the cleavage of the  $\alpha$ -C(sp<sup>3</sup>)-H bond was not the rate-determining step.

## 7. Characterization of products

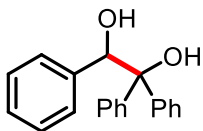

### 1,1,2-Triphenylethane-1,2-diol

**Compound 3aa** (45 mg, white solid, 78% yield). Flash silica gel chromatography (petroleum ether/ethyl acetate = 10/1). Reported compound.<sup>3</sup>

<sup>1</sup>H NMR (400 MHz, CDCl<sub>3</sub>)  $\delta$  7.70 (d,  $J = 7.6$  Hz, 2H), 7.41 (t,  $J = 7.6$  Hz, 2H), 7.31 (t,  $J = 7.2$  Hz, 1H), 7.20 – 7.09 (m, 8H), 7.06 (d,  $J = 7.6$  Hz, 2H), 5.63 (s, 1H), 3.17 (s, 1H), 2.47 (d,  $J = 3.2$  Hz, 1H).

<sup>13</sup>C{<sup>1</sup>H} NMR (101 MHz, CDCl<sub>3</sub>)  $\delta$  145.1, 143.3, 138.8, 128.4, 128.1, 127.7, 127.6, 127.4, 127.3, 127.0, 126.7, 126.1, 80.7, 77.9.

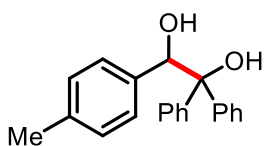

### 1,1-Diphenyl-2-(*p*-tolyl)ethane-1,2-diol

**Compound 3ba** (29 mg, white solid, 48% yield). Flash silica gel chromatography (petroleum ether/ethyl acetate = 10/1). Reported compound.<sup>3</sup>

<sup>1</sup>H NMR (400 MHz, CDCl<sub>3</sub>)  $\delta$  7.69 (d,  $J = 8.0$  Hz, 2H), 7.40 (dd,  $J = 8.0$  Hz,  $J = 1.2$  Hz, 2H), 7.30 (dd,  $J = 6.8$  Hz,  $J = 8.0$  Hz, 1H), 7.18 – 7.07 (m, 5H), 6.95 (s, 4H), 5.61 (s, 1H), 3.14 (s, 1H), 2.40 (s, 1H), 2.27 (s, 3H).

<sup>13</sup>C{<sup>1</sup>H} NMR (101 MHz, CDCl<sub>3</sub>)  $\delta$  145.1, 143.5, 137.4, 135.7, 128.4, 128.2, 127.9, 127.6, 127.3, 126.9, 126.7, 126.2, 80.7, 77.8, 21.1.

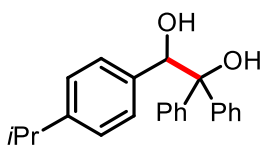

### 2-(4-Isopropylphenyl)-1,1-diphenylethane-1,2-diol

**Compound 3ca** (45 mg, white solid, 68% yield). Flash silica gel chromatography (petroleum

ether/ethyl acetate = 10/1).

$^1\text{H NMR}$  (400 MHz,  $\text{CDCl}_3$ )  $\delta$  7.70 (d,  $J = 7.6$  Hz, 2H), 7.40 (t,  $J = 7.2$  Hz, 2H), 7.29 (t,  $J = 7.6$  Hz, 1H), 7.17 – 7.07 (m, 5H), 7.00 (t,  $J = 9.2$  Hz, 4H), 5.61 (s, 1H), 3.15 (s, 1H), 2.86 – 2.79 (m, 1H), 2.41 (s, 1H), 1.19 (d,  $J = 6.8$  Hz, 6H).

$^{13}\text{C}\{^1\text{H}\}$  NMR (101 MHz,  $\text{CDCl}_3$ )  $\delta$  148.4, 145.1, 143.5, 136.1, 128.4, 128.0, 127.6, 127.3, 127.0, 126.6, 126.2, 125.6, 80.7, 77.8, 33.7, 23.9.

ESI HRMS for  $[\text{C}_{23}\text{H}_{24}\text{O}_2 + \text{Na}^+]$  calculated: 355.1669, found: 355.1662.

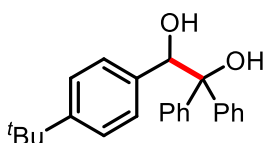

### 2-(4-(*tert*-Butyl)phenyl)-1,1-diphenylethane-1,2-diol

**Compound 3da** (45 mg, white solid, 65% yield). Flash silica gel chromatography (petroleum ether/ethyl acetate = 10/1). Reported compound.<sup>3</sup>

$^1\text{H NMR}$  (400 MHz,  $\text{CDCl}_3$ )  $\delta$  7.70 (d,  $J = 7.6$  Hz, 2H), 7.40 (t,  $J = 7.6$  Hz, 2H), 7.30 (t,  $J = 7.6$  Hz, 1H), 7.17 – 7.10 (m, 7H), 7.00 (d,  $J = 8.0$  Hz, 2H), 5.62 (s, 1H), 3.13 (s, 1H), 2.38 (s, 1H), 1.26 (s, 9H).

$^{13}\text{C}\{^1\text{H}\}$  NMR (101 MHz,  $\text{CDCl}_3$ )  $\delta$  150.7, 145.1, 143.5, 135.7, 128.4, 127.7, 127.6, 127.3, 127.0, 126.7, 126.2, 124.4, 80.7, 77.8, 34.4, 31.2.

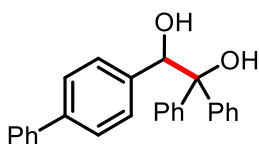

### 2-([1,1'-Biphenyl]-4-yl)-1,1-diphenylethane-1,2-diol

**Compound 3ea** (20 mg, white solid, 27% yield). Flash silica gel chromatography (petroleum ether/ethyl acetate = 7/1).

$^1\text{H NMR}$  (400 MHz,  $\text{CDCl}_3$ )  $\delta$  7.72 (d,  $J = 7.6$  Hz, 2H), 7.55 (d,  $J = 7.6$  Hz, 2H), 7.44 – 7.38 (m, 6H), 7.32 (t,  $J = 7.2$  Hz, 2H), 7.20 – 7.10 (m, 7H), 5.69 (s, 1H), 3.17 (s, 1H), 2.46 (br, 1H).

$^{13}\text{C}\{^1\text{H}\}$  NMR (101 MHz,  $\text{CDCl}_3$ )  $\delta$  145.0, 143.3, 140.6, 140.4, 137.8, 128.7, 128.49, 128.47, 127.7, 127.4, 127.3, 126.97, 126.96, 126.8, 126.2, 126.1, 80.8, 77.8.

ESI HRMS for  $[\text{C}_{26}\text{H}_{22}\text{O}_2 + \text{Na}^+]$  calculated: 389.1512, found: 389.1520.

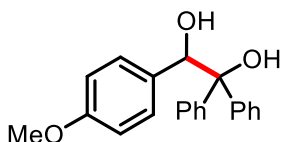

### 2-(4-Methoxyphenyl)-1,1-diphenylethane-1,2-diol

**Compound 3fa** (27 mg, white solid, 42% yield). Flash silica gel chromatography (petroleum ether/ethyl acetate = 10/1). Reported compound.<sup>3</sup>

<sup>1</sup>H NMR (400 MHz, DMSO-*d*<sub>6</sub>) δ 7.58 (d, *J* = 8.0 Hz, 2H), 7.31 – 7.25 (m, 4H), 7.17 (t, *J* = 7.2 Hz, 1H), 7.11 (t, *J* = 7.6 Hz, 2H), 7.05 – 7.00 (m, 3H), 6.62 (d, *J* = 6.8 Hz, 2H), 5.52 (d, *J* = 4.8 Hz, 1H), 5.44 (d, *J* = 5.2 Hz, 2H), 3.64 (s, 3H).

<sup>13</sup>C{<sup>1</sup>H} NMR (101 MHz, DMSO-*d*<sub>6</sub>) δ 157.8, 146.9, 146.2, 134.1, 129.8, 127.4, 127.2, 126.5, 126.0, 125.8, 111.9, 79.8, 76.1, 54.8.

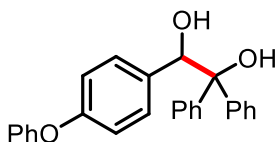

### 2-(4-Phenoxyphenyl)-1,1-diphenylethane-1,2-diol

**Compound 3ga** (54 mg, white solid, 71% yield). Flash silica gel chromatography (petroleum ether/ethyl acetate = 7/1). Reported compound.<sup>4</sup>

<sup>1</sup>H NMR (400 MHz, CDCl<sub>3</sub>) δ 7.70 (d, *J* = 8.0 Hz, 2H), 7.42 (t, *J* = 7.6 Hz, 2H), 7.32 (t, *J* = 7.6 Hz, 3H), 7.15 – 7.08 (m, 6H), 7.02 (d, *J* = 8.0 Hz, 2H), 6.94 (d, *J* = 8.0 Hz, 2H), 6.79 (d, *J* = 8.0 Hz, 2H), 5.60 (s, 1H), 3.19 (br, 1H), 2.48 (br, 1H).

<sup>13</sup>C{<sup>1</sup>H} NMR (101 MHz, CDCl<sub>3</sub>) δ 157.2, 156.5, 145.0, 143.3, 133.8, 129.6, 129.5, 128.5, 127.6, 127.4, 127.0, 126.7, 126.2, 123.1, 118.6, 118.0, 80.8, 77.5.

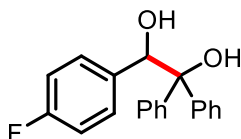

### 2-(4-Fluorophenyl)-1,1-diphenylethane-1,2-diol

**Compound 3ha** (46 mg, white solid, 75% yield). Flash silica gel chromatography (petroleum ether/ethyl acetate = 10/1). Reported compound.<sup>3</sup>

<sup>1</sup>H NMR (400 MHz, CDCl<sub>3</sub>) δ 7.68 (d, *J* = 8.0 Hz, 2H), 7.41 (t, *J* = 6.8 Hz, 2H), 7.32 (t, *J* = 7.2 Hz, 1H), 7.14 – 7.07 (m, 5H), 7.01 (dd, *J* = 8.4 Hz, *J* = 5.6 Hz, 2H), 6.82 (t, *J* = 8.4 Hz, 2H), 5.60 (s, 1H), 3.16 (s, 1H), 2.52 (br, 1H).

$^{13}\text{C}\{^1\text{H}\}$  NMR (101 MHz,  $\text{CDCl}_3$ )  $\delta$  162.21 (d,  $J_{\text{C-F}} = 247.5$  Hz), 144.9, 143.1, 134.51 (d,  $J_{\text{C-F}} = 3.0$  Hz), 129.65 (d,  $J_{\text{C-F}} = 8.1$  Hz), 128.5, 127.7, 127.5, 126.9, 126.8, 126.1, 114.24 (d,  $J_{\text{C-F}} = 22.2$  Hz), 80.7, 77.3.

$^{19}\text{F}$  NMR (376 MHz,  $\text{CDCl}_3$ )  $\delta$  -114.65.

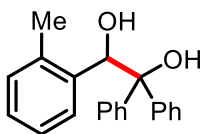

### 1,1-Diphenyl-2-(*o*-tolyl)ethane-1,2-diol

**Compound 3ia** (38 mg, white solid, 63% yield). Flash silica gel chromatography (petroleum ether/ethyl acetate = 10/1). Reported compound.<sup>3</sup>

$^1\text{H}$  NMR (400 MHz,  $\text{CDCl}_3$ )  $\delta$  7.72 (d,  $J = 8.0$  Hz, 2H), 7.67 (d,  $J = 7.6$  Hz, 1H), 7.45 (t,  $J = 7.6$  Hz, 2H), 7.36 (t,  $J = 7.2$  Hz, 1H), 7.21 (t,  $J = 7.2$  Hz, 1H), 7.14 (t,  $J = 7.2$  Hz, 1H), 7.11 – 7.02 (m, 3H), 6.97 – 6.95 (m, 2H), 6.89 (d,  $J = 7.6$  Hz, 1H), 5.85 (s, 1H), 3.37 (s, 1H), 2.33 (s, 1H), 1.74 (s, 3H).

$^{13}\text{C}\{^1\text{H}\}$  NMR (101 MHz,  $\text{CDCl}_3$ )  $\delta$  145.3, 142.8, 137.3, 136.7, 129.6, 128.4, 128.2, 127.7, 127.5, 127.4, 127.22, 127.17, 127.0, 125.5, 81.0, 72.6, 19.1.

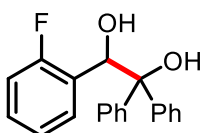

### 2-(2-Fluorophenyl)-1,1-diphenylethane-1,2-diol

**Compound 3ja** (15 mg, white solid, 24% yield). Flash silica gel chromatography (petroleum ether/ethyl acetate = 10/1).

$^1\text{H}$  NMR (400 MHz,  $\text{CDCl}_3$ )  $\delta$  7.69 (d,  $J = 8.0$  Hz, 2H), 7.55 (t,  $J = 7.6$  Hz, 1H), 7.41 (t,  $J = 8.4$  Hz, 2H), 7.32 (t,  $J = 8.0$  Hz, 1H), 7.20 – 7.05 (m, 7H), 6.74 (t,  $J = 8.4$  Hz, 1H), 6.04 (s, 1H), 3.29 (s, 1H), 2.47 (br, 1H).

$^{13}\text{C}\{^1\text{H}\}$  NMR (101 MHz,  $\text{CDCl}_3$ )  $\delta$  159.97 (d,  $J_{\text{C-F}} = 247.5$  Hz), 145.0, 142.7, 129.57 (d,  $J_{\text{C-F}} = 4.0$  Hz), 129.33 (d,  $J_{\text{C-F}} = 8.1$  Hz), 128.5, 127.5, 127.4, 127.0, 126.8, 126.40 (d,  $J_{\text{C-F}} = 13.1$  Hz), 126.2, 123.56 (d,  $J_{\text{C-F}} = 3.0$  Hz), 114.51 (d,  $J_{\text{C-F}} = 23.2$  Hz), 80.8, 70.3.

$^{19}\text{F}$  NMR (376 MHz,  $\text{CDCl}_3$ )  $\delta$  -116.43.

**ESI HRMS** for  $[\text{C}_{20}\text{H}_{17}\text{FO}_2 + \text{Na}^+]$  calculated: 331.1105, found: 331.1097.

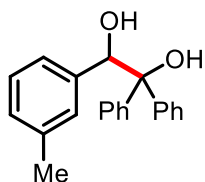

### 1,1-Diphenyl-2-(*m*-tolyl)ethane-1,2-diol

**Compound 3ka** (29 mg, white solid, 48% yield). Flash silica gel chromatography (petroleum ether/ethyl acetate = 10/1).

$^1\text{H NMR}$  (400 MHz,  $\text{CDCl}_3$ )  $\delta$  7.70 (d,  $J = 8.0$  Hz, 2H), 7.43 – 7.38 (m, 2H), 7.30 (dd,  $J = 8.0$  Hz,  $J = 6.8$  Hz, 1H), 7.16 – 7.09 (m, 5H), 7.04 – 6.98 (m, 2H), 6.86 (s, 1H), 6.83 (d,  $J = 7.2$  Hz, 1H), 5.60 (s, 1H), 3.12 (s, 1H), 2.42 (s, 1H), 2.21 (s, 3H).

$^{13}\text{C}\{^1\text{H}\}$  NMR (101 MHz,  $\text{CDCl}_3$ )  $\delta$  145.0, 143.4, 138.6, 137.0, 128.8, 128.4, 127.6, 127.34, 127.31, 127.0, 126.7, 126.2, 125.1, 80.7, 78.0, 21.3.

**ESI HRMS** for  $[\text{C}_{21}\text{H}_{20}\text{O}_2 + \text{Na}^+]$  calculated: 327.1356, found: 327.1350.

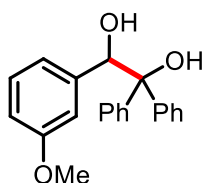

### 2-(3-Methoxyphenyl)-1,1-diphenylethane-1,2-diol

**Compound 3la** (45 mg, white solid, 70% yield). Flash silica gel chromatography (petroleum ether/ethyl acetate = 10/1). Reported compound.<sup>3</sup>

$^1\text{H NMR}$  (400 MHz,  $\text{CDCl}_3$ )  $\delta$  7.69 (d,  $J = 7.6$  Hz, 2H), 7.40 (t,  $J = 8.0$  Hz, 2H), 7.31 (t,  $J = 7.6$  Hz, 1H), 7.19 – 7.05 (m, 6H), 6.73 (dd,  $J = 2.4$  Hz,  $J = 8.0$  Hz, 1H), 6.68 (d,  $J = 8.0$  Hz, 1H), 6.53 (s, 1H), 5.60 (s, 1H), 3.50 (s, 3H), 3.13 (s, 1H), 2.53 (br, 1H).

$^{13}\text{C}\{^1\text{H}\}$  NMR (101 MHz,  $\text{CDCl}_3$ )  $\delta$  158.7, 144.9, 143.4, 140.3, 128.42, 128.40, 127.7, 127.3, 127.0, 126.7, 126.2, 120.3, 113.8, 113.2, 80.7, 77.9, 55.0.

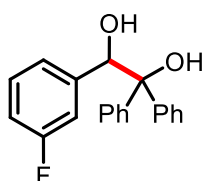

### 2-(3-Fluorophenyl)-1,1-diphenylethane-1,2-diol

**Compound 3ma** (20 mg, white solid, 32% yield). Flash silica gel chromatography (petroleum ether/ethyl acetate = 10/1).

**<sup>1</sup>H NMR** (400 MHz, CDCl<sub>3</sub>) δ 7.68 (d, *J* = 8.0 Hz, 2H), 7.41 (t, *J* = 7.6 Hz, 2H), 7.31 (t, *J* = 7.2 Hz, 1H), 7.14 – 7.03 (m, 6H), 6.89 – 6.83 (m, 2H), 6.75 (d, *J* = 7.6 Hz, 1H), 5.62 (s, 1H), 3.11 (s, 1H), 2.52 (s, 1H).

**<sup>13</sup>C{<sup>1</sup>H} NMR** (101 MHz, CDCl<sub>3</sub>) δ 162.12 (d, *J*<sub>C-F</sub> = 245.4 Hz), 144.8, 142.9, 141.40 (d, *J*<sub>C-F</sub> = 7.1 Hz), 128.67 (d, *J*<sub>C-F</sub> = 8.1 Hz), 128.6, 127.7, 127.5, 126.94, 126.89, 126.1, 123.78 (d, *J*<sub>C-F</sub> = 3.0 Hz), 115.12 (d, *J*<sub>C-F</sub> = 23.2 Hz), 114.50 (d, *J*<sub>C-F</sub> = 21.2 Hz), 80.7, 77.42 (d, *J*<sub>C-F</sub> = 2.0 Hz).

**<sup>19</sup>F NMR** (376 MHz, CDCl<sub>3</sub>) δ -113.92.

**ESI HRMS** for [C<sub>20</sub>H<sub>17</sub>FO<sub>2</sub>+Na<sup>+</sup>] calculated: 331.1105, found: 331.1097.

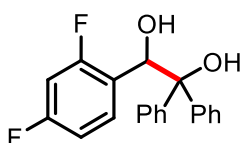

### 2-(2,4-Difluorophenyl)-1,1-diphenylethane-1,2-diol

**Compound 3na** (14 mg, white solid, 21% yield). Flash silica gel chromatography (petroleum ether/ethyl acetate = 10/1).

**<sup>1</sup>H NMR** (400 MHz, CDCl<sub>3</sub>) δ 7.67 (d, *J* = 8.0 Hz, 2H), 7.55 (dd, *J* = 8.4 Hz, *J* = 15.2 Hz, 1H), 7.41 (t, *J* = 7.6 Hz, 2H), 7.32 (t, *J* = 7.6 Hz, 1H), 7.13 – 7.09 (m, 5H), 6.83 – 6.78 (m, 1H), 6.51 – 6.45 (m, 1H), 5.98 (s, 1H), 3.26 (s, 1H), 2.50 (s, 1H).

**<sup>13</sup>C{<sup>1</sup>H} NMR** (101 MHz, CDCl<sub>3</sub>) δ 162.35 (d, *J*<sub>C-F</sub> = 246.4 Hz), 159.93 (d, *J*<sub>C-F</sub> = 231.3 Hz), 144.9, 142.5, 130.66 (dd, *J*<sub>C-F</sub> = 9.1 Hz, *J*<sub>C-F</sub> = 5.1 Hz), 128.6, 127.6, 127.5, 126.93, 126.90, 126.1, 122.51 (t, *J*<sub>C-F</sub> = 13.1 Hz), 110.84 (dd, *J*<sub>C-F</sub> = 21.2 Hz, *J*<sub>C-F</sub> = 3.0 Hz), 102.67 (t, *J*<sub>C-F</sub> = 25.3 Hz), 80.7, 69.8.

**<sup>19</sup>F NMR** (376 MHz, CDCl<sub>3</sub>) δ -110.79 (d, *J*<sub>F-F</sub> = 7.5 Hz, 1F), -112.49 (d, *J*<sub>F-F</sub> = 7.5 Hz, 1F).

**ESI HRMS** for [C<sub>20</sub>H<sub>16</sub>F<sub>2</sub>O<sub>2</sub>+Na<sup>+</sup>] calculated: 349.1011, found: 349.1006.

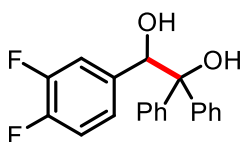

### 2-(3,4-Difluorophenyl)-1,1-diphenylethane-1,2-diol

**Compound 3oa** (17 mg, white solid, 26% yield). Flash silica gel chromatography (petroleum ether/ethyl acetate = 10/1).

**<sup>1</sup>H NMR** (400 MHz, CDCl<sub>3</sub>) δ 7.66 (d, *J* = 7.6 Hz, 2H), 7.41 (t, *J* = 7.6 Hz, 2H), 7.32 (d, *J* = 7.2 Hz, 1H), 7.17 – 7.09 (m, 5H), 6.99 – 6.93 (m, 1H), 6.90 – 6.84 (m, 1H), 6.68 – 6.64 (m, 1H),

5.57 (s, 1H), 3.09 (br, 1H), 2.54 (br, 1H).

$^{13}\text{C}\{^1\text{H}\}$  NMR (101 MHz,  $\text{CDCl}_3$ )  $\delta$  150.81 (d,  $J_{\text{C-F}} = 30.3$  Hz), 148.44 (d,  $J_{\text{C-F}} = 13.1$  Hz), 144.7, 142.8, 135.86 (t,  $J_{\text{C-F}} = 4.0$  Hz), 128.6, 127.8, 127.6, 127.0, 126.8, 126.0, 124.11 (dd,  $J_{\text{C-F}} = 6.1$  Hz,  $J_{\text{C-F}} = 4.0$  Hz), 117.12 (d,  $J_{\text{C-F}} = 18.2$  Hz), 115.88 (d,  $J_{\text{C-F}} = 17.2$  Hz), 80.7, 76.93 (d,  $J_{\text{C-F}} = 1.0$  Hz).

$^{19}\text{F}$  NMR (376 MHz,  $\text{CDCl}_3$ )  $\delta$  -138.64 (d,  $J_{\text{F-F}} = 18.8$  Hz, 1F), -139.25 (d,  $J_{\text{F-F}} = 22.6$  Hz, 1F).

**ESI HRMS** for  $[\text{C}_{20}\text{H}_{16}\text{F}_2\text{O}_2 + \text{Na}^+]$  calculated: 349.1011, found: 349.1006.

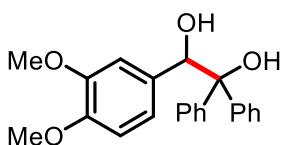

### 2-(3,4-Dimethoxyphenyl)-1,1-diphenylethane-1,2-diol

**Compound 3pa** (32 mg, white solid, 46% yield). Flash silica gel chromatography (petroleum ether/ethyl acetate = 5/1).

$^1\text{H}$  NMR (400 MHz,  $\text{CDCl}_3$ )  $\delta$  7.68 (d,  $J = 6.4$  Hz, 2H), 7.40 (t,  $J = 8.0$  Hz, 2H), 7.30 (t,  $J = 6.8$  Hz, 1H), 7.19 – 7.08 (m, 5H), 6.76 (d,  $J = 8.4$  Hz, 1H), 6.69 (d,  $J = 8.4$  Hz, 1H), 6.36 (s, 1H), 5.58 (s, 1H), 3.82 (s, 3H), 3.56 (s, 3H), 3.07 (s, 1H), 2.50 (br, 1H).

$^{13}\text{C}\{^1\text{H}\}$  NMR (101 MHz,  $\text{CDCl}_3$ )  $\delta$  148.4, 147.8, 144.8, 143.6, 131.1, 128.4, 127.7, 127.3, 127.0, 126.7, 126.3, 120.0, 111.3, 110.0, 80.7, 77.7, 55.7, 55.5.

**ESI HRMS** for  $[\text{C}_{22}\text{H}_{22}\text{O}_4 + \text{Na}^+]$  calculated: 373.1410, found: 373.1418.

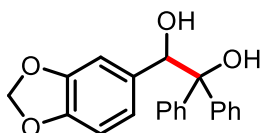

### 2-(Benzo[d][1,3]dioxol-5-yl)-1,1-diphenylethane-1,2-diol

**Compound 3qa** (20 mg, white solid, 30% yield). Flash silica gel chromatography (petroleum ether/ethyl acetate = 5/1).

$^1\text{H}$  NMR (400 MHz,  $\text{DMSO-}d_6$ )  $\delta$  7.57 (d,  $J = 7.6$  Hz, 2H), 7.28 (dd,  $J = 8.0$  Hz,  $J = 16.8$  Hz, 4H), 7.19 – 7.10 (m, 3H), 7.04 (t,  $J = 7.2$  Hz, 1H), 6.76 (s, 1H), 6.56 (d,  $J = 8.0$  Hz, 1H), 6.47 (d,  $J = 8.4$  Hz, 1H), 5.88 (d,  $J = 5.2$  Hz, 2H), 5.53 – 5.48 (m, 3H).

$^{13}\text{C}\{^1\text{H}\}$  NMR (101 MHz,  $\text{DMSO-}d_6$ )  $\delta$  146.8, 146.1, 145.8, 145.5, 136.1, 127.4, 127.21, 127.19, 126.4, 126.0, 125.9, 122.1, 109.3, 106.3, 100.4, 79.8, 76.3.

**ESI HRMS** for  $[\text{C}_{21}\text{H}_{18}\text{O}_4 + \text{Na}^+]$  calculated: 357.1097, found: 357.1094.



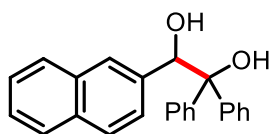

### 2-(Naphthalen-2-yl)-1,1-diphenylethane-1,2-diol

**Compound 3ra** (24 mg, white solid, 35% yield). Flash silica gel chromatography (petroleum ether/ethyl acetate = 7/1). Reported compound.<sup>3</sup>

**<sup>1</sup>H NMR** (400 MHz, CDCl<sub>3</sub>) δ 7.76 – 7.69 (m, 4H), 7.62 (s, 1H), 7.57 (d, *J* = 8.4 Hz, 1H), 7.42 (t, *J* = 7.2 Hz, 4H), 7.33 (t, *J* = 7.6 Hz, 1H), 7.18 – 7.06 (m, 6H), 5.81 (s, 1H), 3.18 (s, 1H), 2.53 (s, 1H).

**<sup>13</sup>C{<sup>1</sup>H} NMR** (101 MHz, CDCl<sub>3</sub>) δ 145.0, 143.3, 136.4, 132.9, 132.7, 128.5, 128.1, 127.7, 127.5, 127.4, 127.2, 127.0, 126.8, 126.2, 126.0, 125.9, 125.8, 80.9, 78.1.

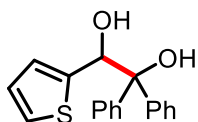

### 1,1-Diphenyl-2-(thiophen-2-yl)ethane-1,2-diol

**Compound 3sa** (29 mg, white solid, 49% yield). Flash silica gel chromatography (petroleum ether/ethyl acetate = 7/1). Reported compound.<sup>3</sup>

**<sup>1</sup>H NMR** (400 MHz, CDCl<sub>3</sub>) δ 7.69 (d, *J* = 8.0 Hz, 2H), 7.41 – 7.37 (m, 2H), 7.34 (d, *J* = 8.0 Hz, 2H), 7.31 – 7.27 (m, 1H), 7.21 – 7.17 (m, 3H), 7.14 – 7.10 (m, 1H), 6.82 – 6.80 (m, 1H), 6.72 (d, *J* = 3.6 Hz, 1H), 5.96 (s, 1H), 3.27 (s, 1H), 2.57 (s, 1H).

**<sup>13</sup>C{<sup>1</sup>H} NMR** (101 MHz, CDCl<sub>3</sub>) δ 144.6, 143.2, 141.7, 128.5, 127.9, 127.4, 126.9, 126.8, 126.5, 125.93, 125.87, 125.8, 80.4, 74.8.

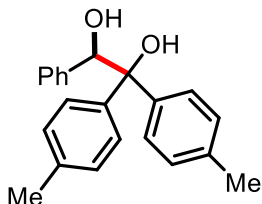

### 2-Phenyl-1,1-di-*p*-tolylethane-1,2-diol

**Compound 3ab** (30 mg, white solid, 47% yield). Flash silica gel chromatography (petroleum ether/ethyl acetate = 10/1). Reported compound.<sup>4</sup>

**<sup>1</sup>H NMR** (400 MHz, CDCl<sub>3</sub>) δ 7.56 (d, *J* = 7.6 Hz, 2H), 7.22 – 7.14 (m, 5H), 7.08 (d, *J* = 7.6

Hz, 2H), 7.02 (d,  $J = 8.0$  Hz, 2H), 6.93 (d,  $J = 8.0$  Hz, 2H), 5.57 (s, 1H), 3.09 (s, 1H), 2.53 (br, 1H), 2.38 (s, 3H), 2.24 (s, 3H).

$^{13}\text{C}\{^1\text{H}\}$  NMR (101 MHz,  $\text{CDCl}_3$ )  $\delta$  142.2, 140.6, 138.9, 136.9, 136.1, 129.1, 128.3, 128.1, 127.5, 127.4, 126.8, 126.0, 80.6, 78.0, 21.0, 20.9.

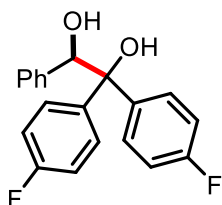

### 1,1-Bis(4-fluorophenyl)-2-phenylethane-1,2-diol

**Compound 3ac** (47 mg, white solid, 72% yield). Flash silica gel chromatography (petroleum ether/ethyl acetate = 10/1). Reported compound.<sup>4</sup>

$^1\text{H}$  NMR (400 MHz,  $\text{CDCl}_3$ )  $\delta$  7.60 (dd,  $J = 8.8$  Hz,  $J = 5.6$  Hz, 2H), 7.23 – 7.14 (m, 3H), 7.10 – 7.01 (m, 6H), 6.79 (t,  $J = 8.4$  Hz, 2H), 5.50 (s, 1H), 3.26 (br, 1H), 2.40 (br, 1H).

$^{13}\text{C}\{^1\text{H}\}$  NMR (101 MHz,  $\text{CDCl}_3$ )  $\delta$  161.97 (d,  $J_{\text{C-F}} = 247.5$  Hz), 161.56 (d,  $J_{\text{C-F}} = 246.4$  Hz), 140.82 (d,  $J_{\text{C-F}} = 3.0$  Hz), 139.11 (d,  $J_{\text{C-F}} = 3.0$  Hz), 138.6, 128.96 (d,  $J_{\text{C-F}} = 8.1$  Hz), 128.02 (d,  $J_{\text{C-F}} = 9.1$  Hz), 128.0, 127.6, 115.14 (d,  $J_{\text{C-F}} = 21.2$  Hz), 114.40 (d,  $J_{\text{C-F}} = 21.2$  Hz), 80.0, 78.0.

$^{19}\text{F}$  NMR (376 MHz,  $\text{CDCl}_3$ )  $\delta$  -115.07, -115.81.

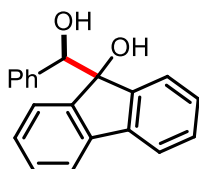

### 9-(Hydroxy(phenyl)methyl)-9H-fluoren-9-ol

**Compound 3ad** (20 mg, white solid, 35% yield). Flash silica gel chromatography (petroleum ether/ethyl acetate = 5/1). Reported compound.<sup>4</sup>

$^1\text{H}$  NMR (400 MHz,  $\text{CDCl}_3$ )  $\delta$  7.69 (d,  $J = 7.2$  Hz, 1H), 7.60 (d,  $J = 4.4$  Hz, 1H), 7.43 – 7.39 (m, 2H), 7.34 – 7.28 (m, 4H), 7.02 (t,  $J = 7.6$  Hz, 1H), 6.93 (t,  $J = 7.6$  Hz, 2H), 6.78 (d,  $J = 7.6$  Hz, 2H), 5.29 (s, 1H), 3.28 (br, 1H), 2.97 (br, 1H).

$^{13}\text{C}\{^1\text{H}\}$  NMR (101 MHz,  $\text{CDCl}_3$ )  $\delta$  145.8, 144.8, 140.20, 140.15, 137.5, 129.3, 129.1, 127.5, 127.31, 127.26, 126.9, 125.7, 124.3, 119.8, 119.6, 84.8, 79.5.

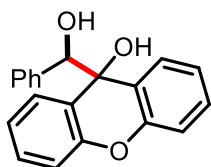

### 9-(Hydroxy(phenyl)methyl)-9H-xanthen-9-ol

**Compound 3ae** (41 mg, white solid, 67% yield). Flash silica gel chromatography (petroleum ether/ethyl acetate = 5/1). Reported compound.<sup>9</sup>

**<sup>1</sup>H NMR** (400 MHz, DMSO-*d*<sub>6</sub>) δ 7.84 (d, *J* = 7.6 Hz, 1H), 7.34 (d, *J* = 8.0 Hz, 1H), 7.30 – 7.23 (m, 2H), 7.17 (d, *J* = 7.6 Hz, 1H), 7.09 – 7.04 (m, 2H), 6.96 – 6.88 (m, 4H), 6.48 (d, *J* = 7.6 Hz, 2H), 6.26 (s, 1H), 5.48 (s, 1H), 4.65 (s, 1H).

**<sup>13</sup>C{<sup>1</sup>H} NMR** (101 MHz, DMSO-*d*<sub>6</sub>) δ 150.6, 150.5, 140.3, 128.5, 128.4, 128.3, 127.9, 127.6, 126.8, 126.3, 125.6, 125.3, 122.1, 122.0, 114.8, 114.5, 81.4, 71.0.

**ESI HRMS** for [C<sub>20</sub>H<sub>16</sub>O<sub>3</sub>+Na<sup>+</sup>] calculated: 327.0992, found: 327.0998.

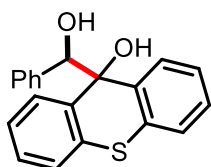

### 9-(Hydroxy(phenyl)methyl)-9H-thioxanthen-9-ol

**Compound 3af** (30 mg, white solid, 47% yield). Flash silica gel chromatography (petroleum ether/ethyl acetate = 5/1). Reported compound.<sup>9</sup>

**<sup>1</sup>H NMR** (400 MHz, CDCl<sub>3</sub>) δ 7.90 (d, *J* = 8.0 Hz, 1H), 7.48 (d, *J* = 7.6 Hz, 1H), 7.42 – 7.30 (m, 3H), 7.15 (t, *J* = 7.6 Hz, 3H), 7.08 (t, *J* = 7.2 Hz, 2H), 6.98 (t, *J* = 7.6 Hz, 1H), 6.82 (d, *J* = 7.6 Hz, 2H), 5.17 (s, 1H), 3.67 (s, 1H), 2.21 (s, 1H).

**<sup>13</sup>C{<sup>1</sup>H} NMR** (101 MHz, CDCl<sub>3</sub>) δ 137.8, 137.6, 136.2, 130.7, 130.4, 127.7, 127.6, 127.32, 127.28, 127.0, 126.8, 126.7, 126.5, 126.4, 126.0, 125.7, 77.8, 72.9.

**ESI HRMS** for [C<sub>20</sub>H<sub>16</sub>O<sub>2</sub>S+Na<sup>+</sup>] calculated: 343.0763, found: 343.0756.

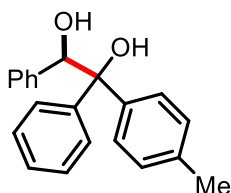

### 1,2-Diphenyl-1-(*p*-tolyl)ethane-1,2-diol

**Compound 3ag** (30 mg, white solid, 49% yield). Flash silica gel chromatography (petroleum

ether/ethyl acetate = 10/1). The diastereomeric ratio is 1.1:1 determined by  $^1\text{H}$  NMR. Reported compound.<sup>3</sup>

$^1\text{H}$  NMR (400 MHz,  $\text{CDCl}_3$ )  $\delta$  7.67 (d,  $J = 7.6$  Hz, 1H), 7.58 (d,  $J = 8.0$  Hz, 1H), 7.41 (t,  $J = 7.6$  Hz, 1H), 7.33 – 7.30 (m, 0.5H), 7.22 – 7.02 (m, 9.5H), 6.94 (d,  $J = 8.0$  Hz, 1H), 5.59 (s, 0.5H), 5.57 (s, 0.5H), 3.20 (s, 0.5H), 3.17 (s, 0.5H), 2.61 (br, 0.5H), 2.58 (br, 0.5H), 2.39 (s, 1.5H), 2.25 (s, 1.5H).

$^{13}\text{C}\{^1\text{H}\}$  NMR (101 MHz,  $\text{CDCl}_3$ )  $\delta$  145.1, 143.5, 142.2, 140.5, 138.9, 138.8, 137.0, 136.2, 129.1, 128.33, 128.29, 128.11, 128.05, 127.6, 127.5, 127.38, 127.35, 127.2, 126.90, 126.85, 126.7, 126.09, 126.05, 80.64, 80.62, 77.9, 21.0, 20.9.

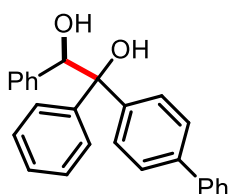

### 1-([1,1'-Biphenyl]-4-yl)-1,2-diphenylethane-1,2-diol

**Compound 3ah** (28 mg, white solid, 38% yield). Flash silica gel chromatography (petroleum ether/ethyl acetate = 5/1). The diastereomeric ratio is 1.08:1 determined by  $^1\text{H}$  NMR. Reported compound.<sup>3</sup>

$^1\text{H}$  NMR (400 MHz,  $\text{CDCl}_3$ )  $\delta$  two isomers: 7.78 – 7.73 (m, 2H), 7.63 (t,  $J = 8.4$  Hz, 2H), 7.51 (d,  $J = 7.6$  Hz, 1H), 7.47 – 7.29 (m, 5H), 7.22 – 7.08 (m, 9H), 5.67 (s, 1H), 3.21 (br, 0.5H), 3.19 (br, 0.5H), 2.49 (br, 1H).

$^{13}\text{C}\{^1\text{H}\}$  NMR (101 MHz,  $\text{CDCl}_3$ )  $\delta$  two isomers: 145.0, 144.2, 143.3, 142.4, 140.6, 140.1, 139.4, 138.8, 138.7, 128.8, 128.7, 128.5, 128.10, 128.07, 127.8, 127.7, 127.5, 127.4, 127.3, 127.2, 127.12, 127.07, 126.96, 126.92, 126.8, 126.6, 126.3, 126.2, 80.71, 80.67, 78.04, 77.99.

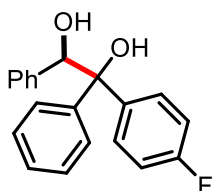

### 1-(4-Fluorophenyl)-1,2-diphenylethane-1,2-diol

**Compound 3ai** (30 mg, white solid, 49% yield). Flash silica gel chromatography (petroleum ether/ethyl acetate = 10/1). The diastereomeric ratio is 1.04:1 determined by  $^1\text{H}$  NMR. Reported compound.<sup>3</sup>

**$^1\text{H}$  NMR** (400 MHz,  $\text{CDCl}_3$ )  $\delta$  two isomers: 7.68–7.62 (m, 2H), 7.42 (t,  $J = 7.6$  Hz, 1H), 7.33 (t,  $J = 7.6$  Hz, 0.5H), 7.23–7.02 (m, 10H), 6.78 (t,  $J = 8.4$  Hz, 1H), 5.56 (s, 0.5H), 5.56 (s, 0.5H), 3.27 (br, 0.5H), 3.17 (br, 0.5H), 2.46 (br, 0.5H), 2.46 (br, 0.5H).

**$^{13}\text{C}\{^1\text{H}\}$  NMR** (101 MHz,  $\text{CDCl}_3$ )  $\delta$  two isomers: 161.92 (d,  $J_{\text{C-F}} = 247.5$  Hz), 161.51 (d,  $J_{\text{C-F}} = 246.4$  Hz), 145.0, 143.3, 140.87 (d,  $J_{\text{C-F}} = 3.0$  Hz), 139.1, 138.8, 138.6, 128.99 (d,  $J_{\text{C-F}} = 7.1$  Hz), 128.5, 128.02 (d,  $J_{\text{C-F}} = 5.1$  Hz), 127.8, 127.7, 127.5, 126.93, 126.85, 126.2, 115.04 (d,  $J_{\text{C-F}} = 21.2$  Hz), 114.32 (d,  $J_{\text{C-F}} = 21.2$  Hz), 80.40, 80.37, 78.0, 77.9.

**$^{19}\text{F}$  NMR** (376 MHz,  $\text{CDCl}_3$ )  $\delta$  -115.40, -116.12.

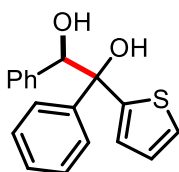

### 1,2-Diphenyl-1-(thiophen-2-yl)ethane-1,2-diol

**Compound 3aj** (40 mg, white solid, 68% yield). Flash silica gel chromatography (petroleum ether/ethyl acetate = 7/1). The diastereomeric ratio is 1.1:1 determined by  $^1\text{H}$  NMR. Reported compound.<sup>4</sup>

**$^1\text{H}$  NMR** (400 MHz,  $\text{CDCl}_3$ )  $\delta$  two isomers: 7.70 (d,  $J = 7.6$  Hz, 1H), 7.41 (d,  $J = 7.6$  Hz, 1H), 7.36–7.11 (m, 8.5H), 7.06–7.04 (m, 1.5H), 6.84 (t,  $J = 8.4$  Hz, 0.5H), 6.74 (br, 0.5H), 5.49 (s, 0.5H), 5.39 (s, 0.5H), 3.54 (br, 0.5H), 3.23 (br, 0.5H), 2.68 (br, 0.5H), 2.47 (br, 0.5H).

**$^{13}\text{C}\{^1\text{H}\}$  NMR** (101 MHz,  $\text{CDCl}_3$ )  $\delta$  two isomers: 150.5, 148.3, 143.5, 142.1, 138.3, 138.0, 128.4, 128.02, 127.95, 127.9, 127.81, 127.78, 127.6, 127.5, 127.2, 126.7, 126.4, 126.0, 125.6, 125.1, 124.9, 124.6, 80.2, 80.0, 79.8, 79.7.

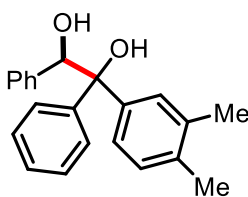

### 1-(3,4-Dimethylphenyl)-1,2-diphenylethane-1,2-diol

**Compound 3ak** (38 mg, white solid, 60% yield). Flash silica gel chromatography (petroleum ether/ethyl acetate = 7/1). The diastereomeric ratio is 1.1:1 determined by  $^1\text{H}$  NMR. Reported compound.<sup>4</sup>

**$^1\text{H}$  NMR** (400 MHz,  $\text{CDCl}_3$ )  $\delta$  two isomers: 7.68 (d,  $J = 7.6$  Hz, 1H), 7.47–7.37 (m, 2H), 7.30 (t,  $J = 7.6$  Hz, 0.6H), 7.20–7.05 (m, 7.5H), 6.91–6.86 (m, 1.5H), 5.61 (s, 0.5H), 5.60 (s, 0.5H),

3.11 (br, 0.5H), 3.03 (br, 0.5H), 2.45 (br, 1H), 2.29 (s, 1.5H), 2.27 (s, 1.5H), 2.14 (s, 1.5H), 2.09 (s, 1.5H).

$^{13}\text{C}\{^1\text{H}\}$  NMR (101 MHz,  $\text{CDCl}_3$ )  $\delta$  two isomers: 145.0, 143.5, 142.5, 140.8, 138.9, 138.7, 136.8, 135.78, 135.75, 135.0, 129.7, 128.9, 128.3, 128.2, 128.14, 128.07, 127.60, 127.58, 127.55, 127.43, 127.40, 127.37, 127.2, 126.9, 126.6, 126.1, 124.0, 123.7, 80.7, 78.1, 78.0, 20.1, 19.8, 19.4, 19.3.

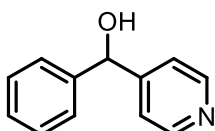

### Phenyl(pyridin-4-yl)methanol

**Compound 5aa** (28.1 mg, white solid, 76% yield). Flash silica gel chromatography (petroleum ether/ethyl acetate = 1/1). Reported compound.<sup>6</sup>

$^1\text{H}$  NMR (400 MHz,  $\text{CDCl}_3$ )  $\delta$  8.38 (d,  $J = 5.2$  Hz, 2H), 7.33 – 7.28 (m, 7H), 5.76 (s, 1H), 3.95 (br, 1H).

$^{13}\text{C}\{^1\text{H}\}$  NMR (101 MHz,  $\text{CDCl}_3$ )  $\delta$  153.2, 149.2, 142.8, 128.7, 128.1, 126.8, 121.4, 74.8.

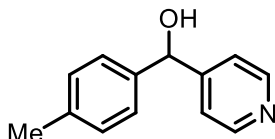

### Pyridin-4-yl(*p*-tolyl)methanol

**Compound 5ba** (17.1 mg, white solid, 43% yield). Flash silica gel chromatography (petroleum ether/ethyl acetate = 2/1). Reported compound.<sup>6</sup>

$^1\text{H}$  NMR (400 MHz,  $\text{CDCl}_3$ )  $\delta$  8.38 (d,  $J = 4.8$  Hz, 2H), 7.29 (d,  $J = 5.2$  Hz, 2H), 7.21 (d,  $J = 7.2$  Hz, 2H), 7.14 (d,  $J = 7.6$  Hz, 2H), 5.73 (s, 1H), 4.12 (br, 1H), 2.32 (s, 3H).

$^{13}\text{C}\{^1\text{H}\}$  NMR (101 MHz,  $\text{CDCl}_3$ )  $\delta$  153.3, 149.3, 140.0, 137.9, 129.4, 126.7, 121.3, 74.6, 21.1.

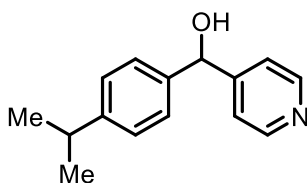

### (4-Isopropylphenyl)(pyridin-4-yl)methanol

**Compound 5ca** (19.1 mg, white solid, 42% yield). Flash silica gel chromatography (petroleum

ether/ethyl acetate = 2/1). Reported compound.<sup>8</sup>

<sup>1</sup>H NMR (400 MHz, CDCl<sub>3</sub>) δ 8.49 (d, *J* = 5.2 Hz, 2H), 7.35 (d, *J* = 4.8 Hz, 2H), 7.27 (d, *J* = 9.2 Hz, 2H), 7.22 (d, *J* = 6.8 Hz, 2H), 5.79 (s, 1H), 2.95 – 2.88 (m, 1H), 2.03 (br, 1H), 1.25 (d, *J* = 8.3 Hz, 6H).

<sup>13</sup>C{<sup>1</sup>H} NMR (101 MHz, CDCl<sub>3</sub>) δ 152.9, 149.4, 149.1, 140.1, 126.88, 126.85, 121.3, 74.8, 33.8, 23.9.

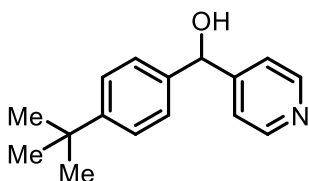

#### (4-(*tert*-Butyl)phenyl)(pyridin-4-yl)methanol

**Compound 5da** (27.8 mg, white solid, 58% yield). Flash silica gel chromatography (petroleum ether/ethyl acetate = 2/1). Reported compound.<sup>6</sup>

<sup>1</sup>H NMR (CDCl<sub>3</sub>, 400 MHz) δ 8.42 (d, *J* = 5.0 Hz, 2H), 7.38 (d, *J* = 8.0 Hz, 2H), 7.34 (d, *J* = 5.2 Hz, 2H), 7.28 – 7.26 (m, 2H), 5.77 (s, 1H), 3.54 (br, 1H), 1.32 (s, 9H).

<sup>13</sup>C{<sup>1</sup>H} NMR (CDCl<sub>3</sub>, 101 MHz) δ 153.2, 151.2, 149.3, 139.8, 126.6, 125.7, 121.3, 74.6, 34.5, 31.3.

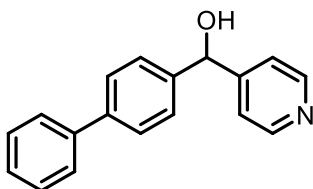

#### [1,1'-Biphenyl]-4-yl(pyridin-4-yl)methanol

**Compound 5ea** (40.7 mg, white solid, 78% yield). Flash silica gel chromatography (petroleum ether/ethyl acetate = 2/1). Reported compound.<sup>7</sup>

<sup>1</sup>H NMR (400 MHz, DMSO-*d*<sub>6</sub>) δ 8.50 (d, *J* = 4.8 Hz, 2H), 7.64 – 7.60 (m, 4H), 7.48 – 7.43 (m, 6H), 7.35 (t, *J* = 7.2 Hz, 1H), 6.20 (s, 1H), 5.78 (s, 1H).

<sup>13</sup>C{<sup>1</sup>H} NMR (101 MHz, DMSO-*d*<sub>6</sub>) δ 154.2, 149.4, 143.6, 139.9, 139.2, 128.9, 127.4, 127.0, 126.70, 126.65, 121.2, 72.8.

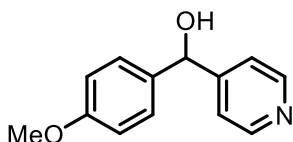

**(4-Methoxyphenyl)(pyridin-4-yl)methanol**

**Compound 5fa** (17.2 mg, white solid, 40% yield). Flash silica gel chromatography (petroleum ether/ethyl acetate = 2/1). Reported compound.<sup>6</sup>

<sup>1</sup>H NMR (400 MHz, CDCl<sub>3</sub>) δ 8.45 (d, *J* = 5.6 Hz, 2H), 7.30 (d, *J* = 4.8 Hz, 2H), 7.24 (d, *J* = 8.0 Hz, 2H), 6.86 (d, *J* = 7.6 Hz, 2H), 5.74 (s, 1H), 3.79 (s, 3H), 3.49 (br, 1H).

<sup>13</sup>C{<sup>1</sup>H} NMR (101 MHz, CDCl<sub>3</sub>) δ 159.5, 153.0, 149.5, 135.0, 128.2, 121.2, 114.1, 74.4, 55.3.

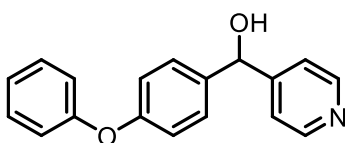

**(4-Phenoxyphenyl)(pyridin-4-yl)methanol**

**Compound 5ga** (35.5 mg, white solid, 64% yield). Flash silica gel chromatography (petroleum ether/ethyl acetate = 1/1).

<sup>1</sup>H NMR (400 MHz, CDCl<sub>3</sub>) δ 8.51 (d, *J* = 5.2 Hz, 2H), 7.35 – 7.28 (m, 6H), 7.12 (t, *J* = 7.2 Hz, 1H), 7.01 – 6.96 (m, 4H), 5.79 (s, 1H), 3.04 (br, 1H).

<sup>13</sup>C{<sup>1</sup>H} NMR (101 MHz, CDCl<sub>3</sub>) δ 157.4, 156.7, 152.7, 149.6, 137.4, 129.8, 128.3, 123.6, 121.2, 119.1, 118.8, 74.4.

**ESI HRMS** for [C<sub>18</sub>H<sub>15</sub>NO<sub>2</sub>+H<sup>+</sup>] calculated: 278.1176, found: 278.1172.

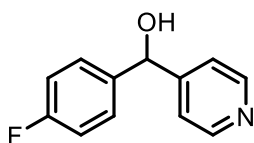

**(4-Fluorophenyl)(pyridin-4-yl)methanol**

**Compound 5ha** (30.9 mg, white solid, 76% yield). Flash silica gel chromatography (petroleum ether/ethyl acetate = 2/1). Reported compound.<sup>6</sup>

<sup>1</sup>H NMR (400 MHz, CDCl<sub>3</sub>) δ 8.46 – 8.41 (m, 2H), 7.32 – 7.28 (m, 4H), 7.05 – 7.00 (m, 2H), 5.78 (s, 1H), 3.58 (br, 1H).

<sup>13</sup>C{<sup>1</sup>H} NMR (101 MHz, CDCl<sub>3</sub>) δ 162.46 (d, *J*<sub>C-F</sub> = 247.5 Hz), 152.6, 149.6, 138.6, 128.54 (d, *J*<sub>C-F</sub> = 8.1 Hz), 121.2, 115.68 (d, *J*<sub>C-F</sub> = 22.2 Hz), 74.2.

<sup>19</sup>F NMR (376 MHz, CDCl<sub>3</sub>) δ -113.64.



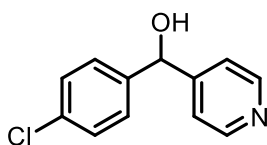

#### (4-Chlorophenyl)(pyridin-4-yl)methanol

**Compound 5ia** (28.0 mg, white solid, 64% yield). Flash silica gel chromatography (petroleum ether/ethyl acetate = 2/1). Reported compound.<sup>7</sup>

<sup>1</sup>H NMR (400 MHz, CDCl<sub>3</sub>) δ 8.44 (d, *J* = 5.2 Hz, 2H), 7.32 – 7.26 (m, 6H), 5.76 (s, 1H), 2.83 (br, 1H).

<sup>13</sup>C{<sup>1</sup>H} NMR (101 MHz, CDCl<sub>3</sub>) δ 152.5, 149.5, 141.2, 134.0, 128.9, 128.1, 121.3, 74.1.

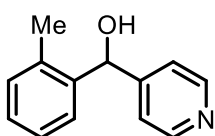

#### Pyridin-4-yl(*o*-tolyl)methanol

**Compound 5ja** (15.5 mg, white solid, 39% yield). Flash silica gel chromatography (petroleum ether/ethyl acetate = 2/1). Reported compound.<sup>6</sup>

<sup>1</sup>H NMR (400 MHz, CDCl<sub>3</sub>) δ 8.40 – 8.36 (m, 2H), 7.26 – 7.24 (m, 1H), 7.21 (d, *J* = 4.0 Hz, 2H), 7.17 – 7.15 (m, 2H), 7.13 – 7.10 (m, 1H), 5.93 (s, 1H), 3.17 (br, 1H), 2.25 (s, 3H).

<sup>13</sup>C{<sup>1</sup>H} NMR (101 MHz, CDCl<sub>3</sub>) δ 152.3, 149.4, 140.4, 135.7, 130.9, 128.2, 127.2, 126.4, 121.7, 72.1, 19.4.

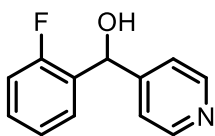

#### (2-Fluorophenyl)(pyridin-4-yl)methanol

**Compound 5ka** (16.2 mg, white solid, 40% yield). Flash silica gel chromatography (petroleum ether/ethyl acetate = 2/1).

<sup>1</sup>H NMR (400 MHz, CDCl<sub>3</sub>) δ 8.43 (d, *J* = 4.4 Hz, 2H), 7.45 (t, *J* = 8.0 Hz, 1H), 7.35 (d, *J* = 5.2 Hz, 2H), 7.31 – 7.28 (m, 1H), 7.15 (t, *J* = 7.6 Hz, 1H), 7.05 (t, *J* = 8.4 Hz, 1H), 6.14 (s, 1H), 4.30 (br, 1H).

<sup>13</sup>C{<sup>1</sup>H} NMR (101 MHz, CDCl<sub>3</sub>) δ 159.76 (d, *J*<sub>C-F</sub> = 247.5 Hz), 152.3, 149.4, 130.05 (d, *J*<sub>C-F</sub> = 13.1 Hz), 129.67 (d, *J*<sub>C-F</sub> = 8.1 Hz), 127.89 (d, *J*<sub>C-F</sub> = 4.0 Hz), 124.61 (d, *J*<sub>C-F</sub> = 4.0 Hz),

121.2, 115.52 (d,  $J_{C-F} = 21.2$  Hz), 68.17 (d,  $J_{C-F} = 4.0$  Hz).

$^{19}\text{F}$  NMR (376 MHz,  $\text{CDCl}_3$ )  $\delta$  -118.56.

ESI HRMS for  $[\text{C}_{12}\text{H}_{10}\text{FNO}+\text{H}^+]$  calculated: 204.0819, found: 204.0811.

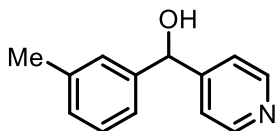

### Pyridin-4-yl(*m*-tolyl)methanol

**Compound 5la** (11.9 mg, white solid, 30% yield). Flash silica gel chromatography (petroleum ether/ethyl acetate = 2/1). Reported compound.<sup>6</sup>

$^1\text{H}$  NMR (400 MHz,  $\text{CDCl}_3$ )  $\delta$  8.47 (dd,  $J = 1.6$  Hz,  $J = 4.4$  Hz, 2H), 7.32 (d,  $J = 6.4$  Hz, 2H), 7.27 – 7.22 (m, 1H), 7.15 – 7.11 (m, 3H), 5.75 (s, 1H), 3.30 (br, 1H), 2.33 (s, 3H).

$^{13}\text{C}\{^1\text{H}\}$  NMR (101 MHz,  $\text{CDCl}_3$ )  $\delta$  152.8, 149.6, 142.7, 138.6, 129.0, 128.7, 127.4, 123.9, 121.2, 75.0, 21.4.

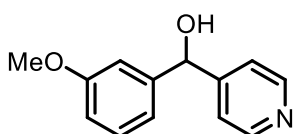

### (3-Methoxyphenyl)(pyridin-4-yl)methanol

**Compound 5ma** (17.7 mg, white solid, 41% yield). Flash silica gel chromatography (petroleum ether/ethyl acetate = 2/1). Reported compound.<sup>6</sup>

$^1\text{H}$  NMR (400 MHz,  $\text{CDCl}_3$ )  $\delta$  8.44 – 8.40 (m, 2H), 7.30 (d,  $J = 5.2$  Hz, 2H), 7.23 (d,  $J = 8.4$  Hz, 1H), 6.91 – 6.87 (m, 2H), 6.83 – 6.80 (m, 1H), 5.73 (s, 1H), 3.75 (s, 3H).

$^{13}\text{C}\{^1\text{H}\}$  NMR (101 MHz,  $\text{CDCl}_3$ )  $\delta$  159.9, 152.7, 149.5, 144.3, 129.8, 121.3, 119.0, 113.5, 112.4, 74.8, 55.2.

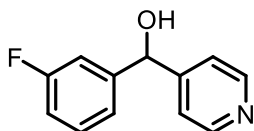

### (3-Fluorophenyl)(pyridin-4-yl)methanol

**Compound 5na** (9.3 mg, white solid, 23% yield). Flash silica gel chromatography (petroleum ether/ethyl acetate = 3/1). Reported compound.<sup>9</sup>

$^1\text{H}$  NMR (400 MHz,  $\text{CDCl}_3$ )  $\delta$  8.43 – 8.39 (m, 2H), 7.33 – 7.27 (m, 3H), 7.12 – 7.05 (m, 2H), 6.97 (t,  $J = 8.4$  Hz, 1H), 5.76 (s, 1H).

$^{13}\text{C}\{^1\text{H}\}$  NMR (101 MHz,  $\text{CDCl}_3$ )  $\delta$  162.95 (d,  $J_{\text{C-F}} = 247.5$  Hz), 152.5, 149.5, 145.3, 130.30 (d,  $J_{\text{C-F}} = 8.1$  Hz), 122.28 (d,  $J_{\text{C-F}} = 3.0$  Hz), 121.3, 115.05 (d,  $J_{\text{C-F}} = 21.2$  Hz), 113.62 (d,  $J_{\text{C-F}} = 22.2$  Hz), 74.2.

$^{19}\text{F}$  NMR (376 MHz,  $\text{CDCl}_3$ )  $\delta$  -112.05.

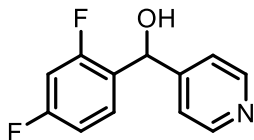

**(2,4-Difluorophenyl)(pyridin-4-yl)methanol**

**Compound 5oa** (19.4 mg, white solid, 44% yield). Flash silica gel chromatography (petroleum ether/ethyl acetate = 1/1).

$^1\text{H}$  NMR (400 MHz,  $\text{CDCl}_3$ )  $\delta$  8.37 (d,  $J = 5.6$  Hz, 2H), 7.44 – 7.38 (m, 1H), 7.32 (d,  $J = 5.2$  Hz, 2H), 6.88 – 6.84 (m, 1H), 6.80 – 6.75 (m, 1H), 6.07 (s, 1H), 5.03 (s, 1H).

$^{13}\text{C}\{^1\text{H}\}$  NMR (101 MHz,  $\text{CDCl}_3$ )  $\delta$  162.49 (dd,  $J_{\text{C-F}} = 12.1$  Hz,  $J_{\text{C-F}} = 250.5$  Hz), 159.74 (dd,  $J_{\text{C-F}} = 12.1$  Hz,  $J_{\text{C-F}} = 249.5$  Hz), 152.5, 149.3, 128.93 (dd,  $J_{\text{C-F}} = 4.0$  Hz,  $J_{\text{C-F}} = 10.1$  Hz), 126.27 (dd,  $J_{\text{C-F}} = 4.0$  Hz,  $J_{\text{C-F}} = 14.1$  Hz), 121.2, 111.79 (dd,  $J_{\text{C-F}} = 4.0$  Hz,  $J_{\text{C-F}} = 21.2$  Hz), 103.86 (t,  $J_{\text{C-F}} = 25.3$  Hz), 67.54 (d,  $J_{\text{C-F}} = 3.0$  Hz).

$^{19}\text{F}$  NMR (376 MHz,  $\text{CDCl}_3$ )  $\delta$  -110.17 (d,  $J_{\text{F-F}} = 7.5$  Hz, 1F), -114.58 (d,  $J_{\text{F-F}} = 7.5$  Hz, 1F).

**ESI HRMS** for  $[\text{C}_{12}\text{H}_9\text{F}_2\text{NO}+\text{H}^+]$  calculated: 222.0725, found: 222.0715.

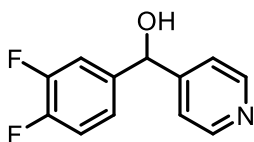

**(3,4-Difluorophenyl)(pyridin-4-yl)methanol**

**Compound 5pa** (23.0 mg, white solid, 52% yield). Flash silica gel chromatography (petroleum ether/ethyl acetate = 2/1).

$^1\text{H}$  NMR (400 MHz,  $\text{CDCl}_3$ )  $\delta$  8.43 (d,  $J = 4.4$  Hz, 2H), 7.29 (d,  $J = 4.8$  Hz, 2H), 7.20 – 7.04 (m, 3H), 5.74 (s, 1H), 4.22 (br, 1H).

$^{13}\text{C}\{^1\text{H}\}$  NMR (101 MHz,  $\text{CDCl}_3$ )  $\delta$  152.3, 151.44 (dd,  $J_{\text{C-F}} = 4.8$  Hz,  $J_{\text{C-F}} = 45.5$  Hz), 149.6, 148.96 (dd,  $J_{\text{C-F}} = 5.2$  Hz,  $J_{\text{C-F}} = 46.5$  Hz), 139.8 (t,  $J_{\text{C-F}} = 5.1$  Hz), 122.67 (dd,  $J_{\text{C-F}} = 4.0$  Hz,  $J_{\text{C-F}} = 7.1$  Hz), 121.2, 117.48 (d,  $J_{\text{C-F}} = 17.2$  Hz), 115.73 (d,  $J_{\text{C-F}} = 18.2$  Hz), 73.7.

$^{19}\text{F}$  NMR (376 MHz,  $\text{CDCl}_3$ )  $\delta$  -136.48 (d,  $J_{\text{F-F}} = 18.8$  Hz, 1F), -138.31 (d,  $J_{\text{F-F}} = 22.6$  Hz, 1F).

**ESI HRMS** for  $[\text{C}_{12}\text{H}_9\text{F}_2\text{NO}+\text{H}^+]$  calculated: 222.0725, found: 222.0715.

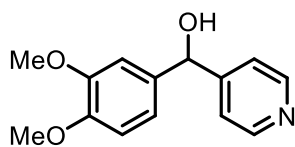

**(3,4-Dimethoxyphenyl)(pyridin-4-yl)methanol**

**Compound 5qa** (22.5 mg, white solid, 46% yield). Flash silica gel chromatography (petroleum ether/ethyl acetate = 1/1). Reported compound.<sup>8</sup>

<sup>1</sup>H NMR (400 MHz, CDCl<sub>3</sub>) δ 8.45 (d, *J* = 4.8 Hz, 2H), 7.30 (d, *J* = 5.2 Hz, 2H), 6.87 – 6.80 (m, 3H), 5.73 (s, 1H), 3.86 (s, 3H), 3.82 (s, 3H).

<sup>13</sup>C{<sup>1</sup>H} NMR (101 MHz, CDCl<sub>3</sub>) δ 152.9, 149.5, 149.3, 148.9, 135.4, 121.2, 119.3, 111.0, 109.7, 74.6, 55.9, 55.8.

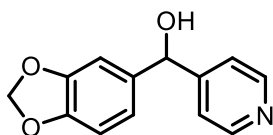

**Benzo[*d*][1,3]dioxol-5-yl(pyridin-4-yl)methanol**

**Compound 5ra** (14.2 mg, white solid, 31% yield). Flash silica gel chromatography (petroleum ether/ethyl acetate = 1/1). Reported compound.<sup>10</sup>

<sup>1</sup>H NMR (400 MHz, CDCl<sub>3</sub>) δ 8.52 (d, *J* = 4.8 Hz, 2H), 7.31 (d, *J* = 4.8 Hz, 2H), 6.84 – 6.76 (m, 3H), 5.95 (s, 2H), 5.71 (s, 1H), 1.73 (br, 1H).

<sup>13</sup>C{<sup>1</sup>H} NMR (101 MHz, CDCl<sub>3</sub>) δ 152.4, 149.7, 148.1, 147.6, 136.7, 121.1, 120.5, 108.3, 107.2, 101.2, 74.8.

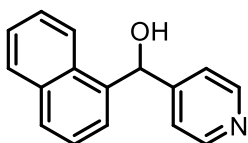

**Naphthalen-1-yl(pyridin-4-yl)methanol**

**Compound 5sa** (16.9 mg, white solid, 36% yield). Flash silica gel chromatography (petroleum ether/ethyl acetate = 1/1).

<sup>1</sup>H NMR (400 MHz, CDCl<sub>3</sub>) δ 8.42 (d, *J* = 5.2 Hz, 2H), 8.04 (d, *J* = 8.0 Hz, 1H), 7.87 (d, *J* = 8.0 Hz, 1H), 7.83 (d, *J* = 7.6 Hz, 1H), 7.49 – 7.42 (m, 4H), 7.32 (d, *J* = 5.2 Hz, 2H), 6.43 (s, 1H), 3.78 (br, 1H).

<sup>13</sup>C{<sup>1</sup>H} NMR (101 MHz, CDCl<sub>3</sub>) δ 152.4, 149.5, 137.8, 134.1, 130.6, 129.2, 128.9, 126.4,

125.9, 125.7, 125.3, 123.9, 121.6, 72.7.

**ESI HRMS** for  $[C_{16}H_{13}NO+H^+]$  calculated: 236.1070, found: 236.1062.

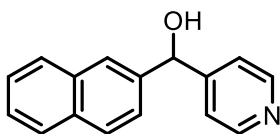

#### **Naphthalen-2-yl(pyridin-4-yl)methanol**

**Compound 5ta** (23.0 mg, white solid, 49% yield). Flash silica gel chromatography (petroleum ether/ethyl acetate = 1/1). Reported compound.<sup>11</sup>

**<sup>1</sup>H NMR** (400 MHz, CDCl<sub>3</sub>)  $\delta$  8.37 – 8.30 (m, 2H), 7.81 – 7.76 (m, 4H), 7.48 – 7.46 (m, 2H), 7.36 (d,  $J$  = 8.4 Hz, 1H), 7.32 – 7.29 (m, 2H), 5.87 (s, 1H), 4.76 (br, 1H).

**<sup>13</sup>C{<sup>1</sup>H} NMR** (101 MHz, CDCl<sub>3</sub>)  $\delta$  153.3, 149.1, 140.2, 133.1, 133.0, 128.7, 128.0, 127.7, 126.4, 126.2, 125.6, 124.5, 121.5, 74.7.

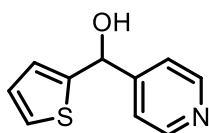

#### **Pyridin-4-yl(thiophen-2-yl)methanol**

**Compound 5ua** (24.8 mg, white solid, 65% yield). Flash silica gel chromatography (petroleum ether/ethyl acetate = 1/1). Reported compound.<sup>12</sup>

**<sup>1</sup>H NMR** (400 MHz, CDCl<sub>3</sub>)  $\delta$  8.54 (s, 2H), 7.41 (d,  $J$  = 4.8 Hz, 2H), 7.29 (d,  $J$  = 4.8 Hz, 1H), 6.97 – 6.93 (m, 2H), 6.05 (s, 1H), 2.97 (br, 1H).

**<sup>13</sup>C{<sup>1</sup>H} NMR** (101 MHz, CDCl<sub>3</sub>)  $\delta$  152.3, 149.4, 146.5, 126.8, 126.2, 125.5, 121.3, 70.7.

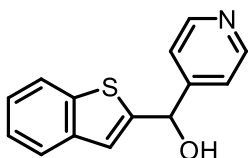

#### **Benzo[b]thiophen-2-yl(pyridin-4-yl)methanol**

**Compound 5va** (28.0 mg, white solid, 58% yield). Flash silica gel chromatography (petroleum ether/ethyl acetate = 1/1).

**<sup>1</sup>H NMR** (400 MHz, CDCl<sub>3</sub>)  $\delta$  8.54 (d,  $J$  = 7.6 Hz, 2H), 7.78 (d,  $J$  = 7.6 Hz, 1H), 7.70 (d,  $J$  = 8.0 Hz, 1H), 7.42 (d,  $J$  = 5.2 Hz, 2H), 7.36 – 7.29 (m, 2H), 7.17 (s, 1H), 6.10 (s, 1H), 3.76 (br, 1H).

$^{13}\text{C}\{^1\text{H}\}$  NMR (101 MHz,  $\text{CDCl}_3$ )  $\delta$  151.4, 149.8, 147.0, 139.9, 139.1, 124.7, 124.5, 123.8, 122.5, 121.9, 121.2, 71.3.

ESI HRMS for  $[\text{C}_{14}\text{H}_{11}\text{NOS}+\text{H}^+]$  calculated: 242.0634, found: 242.0628.

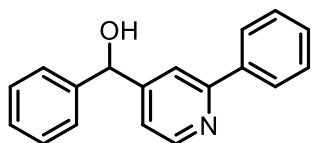

#### Phenyl(2-phenylpyridin-4-yl)methanol

**Compound 5ab** (43.3 mg, white solid, 83% yield). Flash silica gel chromatography (petroleum ether/ethyl acetate = 5/1). Reported compound.<sup>7</sup>

$^1\text{H}$  NMR (400 MHz,  $\text{CDCl}_3$ )  $\delta$  8.48 (d,  $J = 5.2$  Hz, 1H), 7.88 (d,  $J = 6.8$  Hz, 2H), 7.71 (s, 1H), 7.44 – 7.39 (m, 3H), 7.32 – 7.27 (m, 5H), 7.16 (d,  $J = 5.2$  Hz, 1H), 5.73 (s, 1H), 4.08 (br, 1H).

$^{13}\text{C}\{^1\text{H}\}$  NMR (101 MHz,  $\text{CDCl}_3$ )  $\delta$  157.5, 153.7, 149.3, 142.7, 139.1, 128.9, 128.7, 128.6, 128.1, 127.0, 126.8, 119.9, 118.3, 74.9.

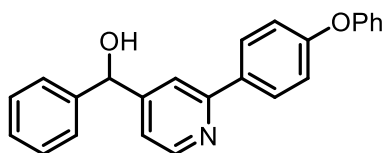

#### (2-(4-Phenoxyphenyl)pyridin-4-yl)(phenyl)methanol

**Compound 5ac** (47.3 mg, white solid, 67% yield). Flash silica gel chromatography (petroleum ether/ethyl acetate = 5/1).

$^1\text{H}$  NMR (400 MHz,  $\text{CDCl}_3$ )  $\delta$  8.49 (d,  $J = 5.2$  Hz, 1H), 7.88 (d,  $J = 8.4$  Hz, 2H), 7.70 (s, 1H), 7.38 – 7.29 (m, 7H), 7.17 – 7.12 (m, 2H), 7.05 (d,  $J = 8.0$  Hz, 4H), 5.77 (s, 1H), 3.63 (br, 1H).

$^{13}\text{C}\{^1\text{H}\}$  NMR (101 MHz,  $\text{CDCl}_3$ )  $\delta$  158.3, 157.0, 156.7, 153.5, 149.4, 142.7, 134.2, 129.8, 128.8, 128.6, 128.2, 126.8, 123.6, 119.5, 119.2, 118.7, 117.7, 75.0.

ESI HRMS for  $[\text{C}_{24}\text{H}_{19}\text{NO}_2+\text{H}^+]$  calculated: 354.1489, found: 354.1479.

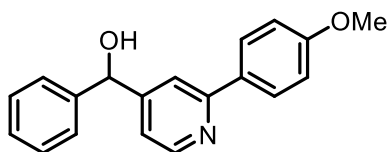

#### (2-(4-Methoxyphenyl)pyridin-4-yl)(phenyl)methanol

**Compound 5ad** (47.1 mg, white solid, 81% yield). Flash silica gel chromatography (petroleum ether/ethyl acetate = 5/1). Reported compound.<sup>7</sup>

**<sup>1</sup>H NMR** (400 MHz, CDCl<sub>3</sub>) δ 8.45 (d, *J* = 5.2 Hz, 1H), 7.85 (d, *J* = 8.8 Hz, 2H), 7.67 (s, 1H), 7.33 – 7.27 (m, 5H), 7.11 (d, *J* = 5.2 Hz, 1H), 6.93 (d, *J* = 9.2 Hz, 2H), 5.74 (s, 1H), 3.82 (s, 3H), 3.64 (br, 1H).

**<sup>13</sup>C{<sup>1</sup>H} NMR** (101 MHz, CDCl<sub>3</sub>) δ 160.4, 157.2, 153.4, 149.3, 142.7, 131.8, 128.7, 128.3, 128.1, 126.8, 119.2, 117.4, 114.0, 75.0, 55.3.

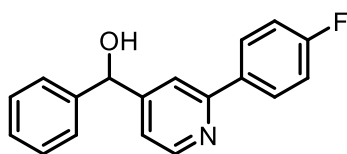

### (2-(4-Fluorophenyl)pyridin-4-yl)(phenyl)methanol

**Compound 5ae** (41.3 mg, white solid, 74% yield). Flash silica gel chromatography (petroleum ether/ethyl acetate = 5/1).

**<sup>1</sup>H NMR** (400 MHz, CDCl<sub>3</sub>) δ 8.49 (d, *J* = 4.8 Hz, 1H), 7.90 – 7.86 (m, 2H), 7.69 (s, 1H), 7.34 – 7.28 (m, 5H), 7.17 (d, *J* = 5.2 Hz, 1H), 7.10 (t, *J* = 8.4 Hz, 2H), 5.77 (s, 1H), 3.58 (br, 1H).

**<sup>13</sup>C{<sup>1</sup>H} NMR** (101 MHz, CDCl<sub>3</sub>) δ 163.47 (d, *J*<sub>C-F</sub> = 249.5 Hz), 156.6, 153.6, 149.4, 142.6, 135.3, 128.84 (d, *J*<sub>C-F</sub> = 8.1 Hz), 128.3, 126.8, 119.8, 117.8, 115.56 (d, *J*<sub>C-F</sub> = 22.2 Hz), 75.0.

**<sup>19</sup>F NMR** (376 MHz, CDCl<sub>3</sub>) δ -112.88.

**ESI HRMS** for [C<sub>18</sub>H<sub>14</sub>FNO+H<sup>+</sup>] calculated: 280.1132, found: 280.1122.

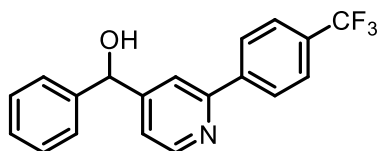

### Phenyl(2-(4-(trifluoromethyl)phenyl)pyridin-4-yl)methanol

**Compound 5af** (25.0 mg, white solid, 38% yield). Flash silica gel chromatography (petroleum ether/ethyl acetate = 7/1). Reported compound.<sup>7</sup>

**<sup>1</sup>H NMR** (400 MHz, CDCl<sub>3</sub>) δ 8.60 (d, *J* = 4.8 Hz, 1H), 8.05 (d, *J* = 8.0 Hz, 2H), 7.80 (s, 1H), 7.69 (d, *J* = 8.0 Hz, 2H), 7.37 – 7.27 (m, 6H), 5.84 (s, 1H), 2.92 (br, 1H).

**<sup>13</sup>C{<sup>1</sup>H} NMR** (101 MHz, CDCl<sub>3</sub>) δ 156.1, 153.6, 149.8, 142.5, 130.80 (d, *J*<sub>C-F</sub> = 32.3 Hz), 128.9, 128.4, 127.3, 126.8, 125.61 (dd, *J*<sub>C-F</sub> = 7.1 Hz, *J*<sub>C-F</sub> = 3.0 Hz), 122.8, 120.6, 118.4, 75.1.

**<sup>19</sup>F NMR** (376 MHz, CDCl<sub>3</sub>) δ -62.56.

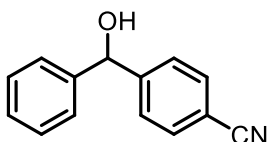

#### 4-(Hydroxy(phenyl)methyl)benzonitrile

**Compound 5ag** (8.4 mg, oil, 20% yield). Flash silica gel chromatography (petroleum ether/ethyl acetate = 20/1). Reported compound.<sup>6</sup>

<sup>1</sup>H NMR (400 MHz, CDCl<sub>3</sub>) δ 7.61 (d, *J* = 8.0 Hz, 2H), 7.51 (d, *J* = 8.0 Hz, 2H), 7.38 – 7.30 (m, 5H), 5.86 (s, 1H), 2.49 (s, 1H).

<sup>13</sup>C{<sup>1</sup>H} NMR (101 MHz, CDCl<sub>3</sub>) δ 148.8, 142.8, 132.2, 128.8, 128.3, 127.0, 126.6, 118.8, 111.1, 75.6.

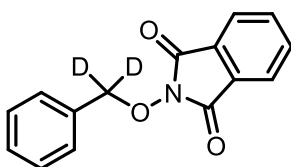

#### 2-(Phenylmethoxy-*d*<sub>2</sub>)isoindoline-1,3-dione

**Compound D-1** (white solid). Flash silica gel chromatography (petroleum ether/ethyl acetate = 10/1). Reported compound.<sup>13</sup>

<sup>1</sup>H NMR (400 MHz, CDCl<sub>3</sub>) δ 7.81 – 7.79 (m, 2H), 7.74 – 7.71 (m, 2H), 7.55 – 7.52 (m, 2H), 7.38 – 7.36 (m, 3H).

<sup>13</sup>C{<sup>1</sup>H} NMR (101 MHz, CDCl<sub>3</sub>) δ 163.5, 134.4, 133.5, 129.9, 129.3, 128.8, 128.5, 123.5.

## 8. References

1. S. Grottelli, G. Annunziato, G. Pampalone, M. Pieroni, M. Dindo, F. Ferlenghi, G. Costantino and B. Cellini, *J. Med. Chem.* **2022**, *65*, 9718–9734.
2. J. Zhang, D. Liu, S. Liu, Y. Ge, Y. Lan and Y. Chen, *iScience.* **2020**, *23*, 100755.
3. M. Takeda, A. Mitsui, K. Nagao and H. Ohmiya, *J. Am. Chem. Soc.* **2019**, *141*, 3664–3669.
4. L.-J. Wang, P. Ye, N. Tan and B. Zhang, *Green Chem.*, **2022**, *24*, 8386–8392.
5. S. Grottelli, G. Annunziato, G. Pampalone, M. Pieroni, M. Dindo, F. Ferlenghi, G. Costantino and B. Cellini, *J. Med. Chem.* **2022**, *65*, 9718–9734.
6. X. Zhang, C. Yang, H. Gao, L. Wang, L. Guo and W. Xia, *Org. Lett.* **2021**, *23*, 3472–3476.
7. L.-J. Zhong, H.-Y. Wang, X.-H. Ouyang, J.-H. Li and D.-L. An, *Chem. Commun.* **2020**, *56*, 8671–8674.



8. Y. Huang, Q. Zhang, L.-L. Hua, L.-W. Zhan, J. Hou and B.-D. Li, *Cell Reports Physical Science*, **2022**, *3*, 100994.
9. B. Ágai, Á. Proszenyák, G. Tárkányi, L. Vida, and F. Faigl, *Eur. J. Org. Chem.* **2004**, 3623–3632.
10. L. Wang, S. Xie, L. Ma, Y. Chen and W. Lu, *Bioorganic & Medicinal Chemistry*, **2015**, *23*, 1950–1962.
11. F. Trécourt, G. Breton, V. Bonnet, F. Mongin, F. Marsais and G. Quéguiner, *Tetrahedron*, **2000**, *56*, 1349–1360.
12. E. S. Isbrandt, A. Nasim, K. Zhao and S. G. Newman, *J. Am. Chem. Soc.* **2021**, *143*, 14646–14656.
13. C. Wang, Y. Yu, W.-L. Liu, and W.-L. Duan, *Org. Lett.* **2019**, *21*, 9147–9152.

## **9. NMR spectra of products**

### $^1\text{H}$ NMR (400 MHz, $\text{CDCl}_3$ ) of Compound 3aa

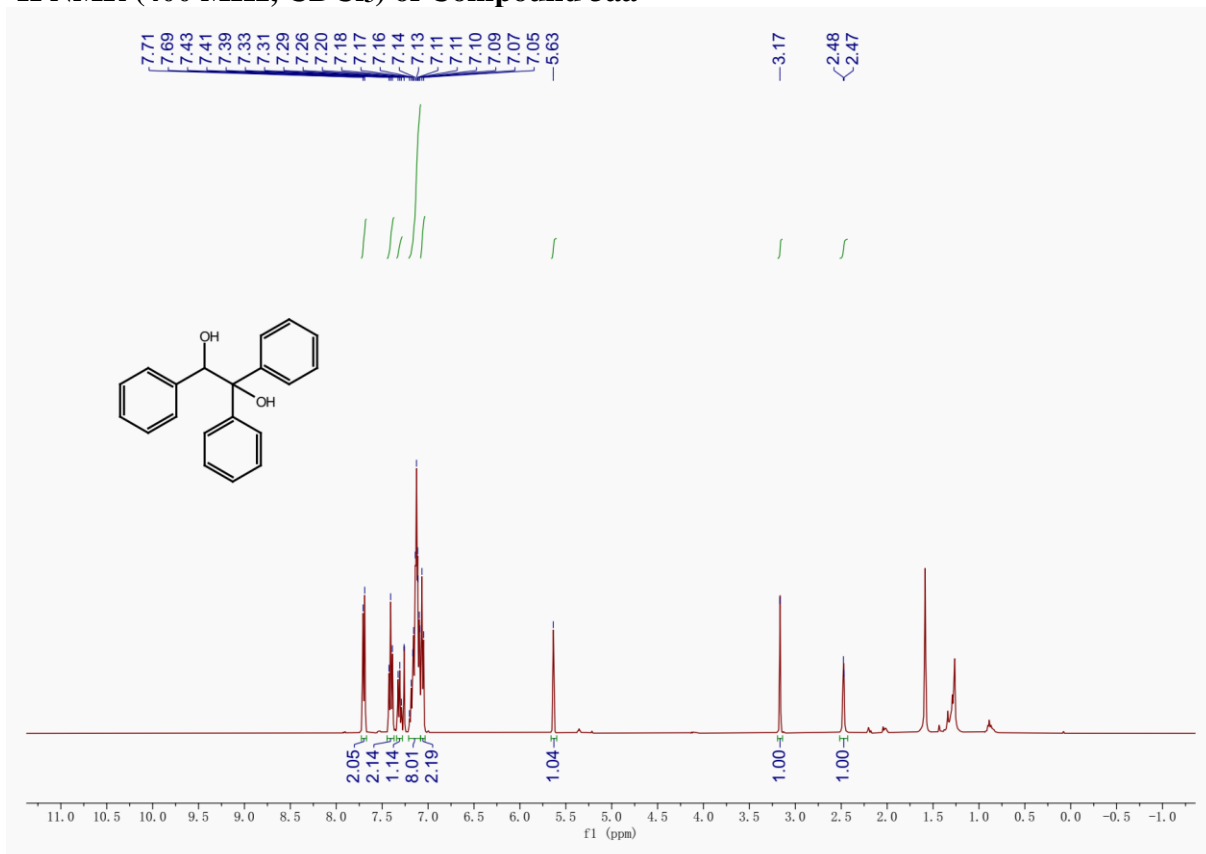

### $^{13}\text{C}\{^1\text{H}\}$ NMR (101 MHz, $\text{CDCl}_3$ ) of Compound 3aa

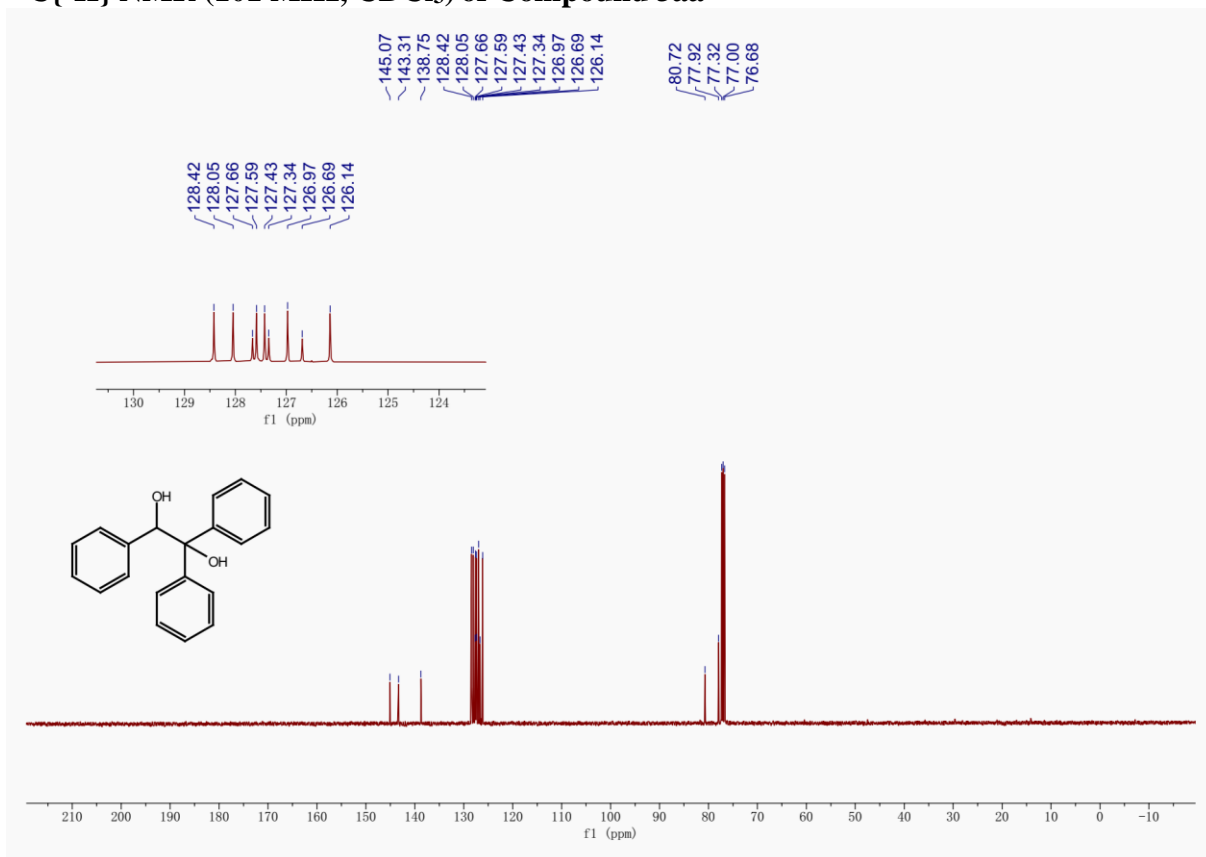

### $^1\text{H}$ NMR (400 MHz, $\text{CDCl}_3$ ) of Compound 3ba

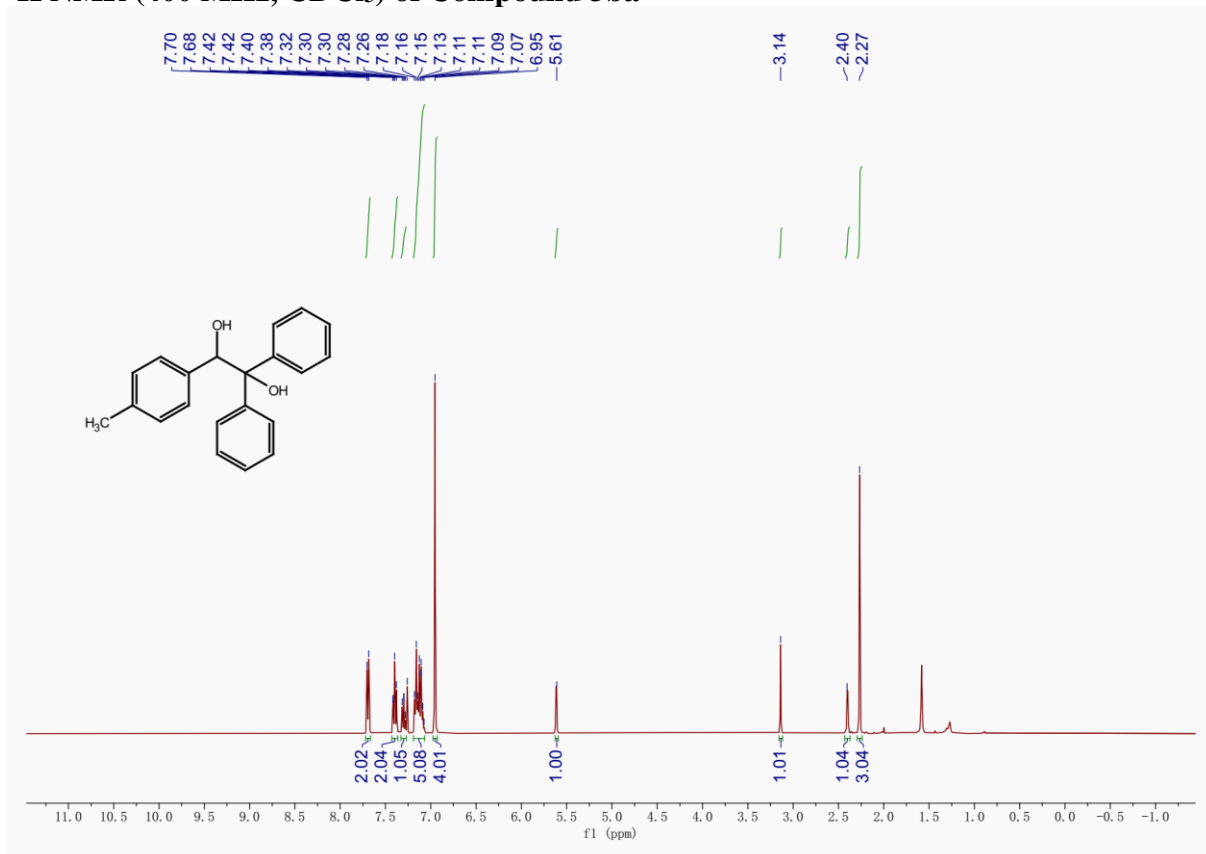

### $^{13}\text{C}\{^1\text{H}\}$ NMR (101 MHz, $\text{CDCl}_3$ ) of Compound 3ba

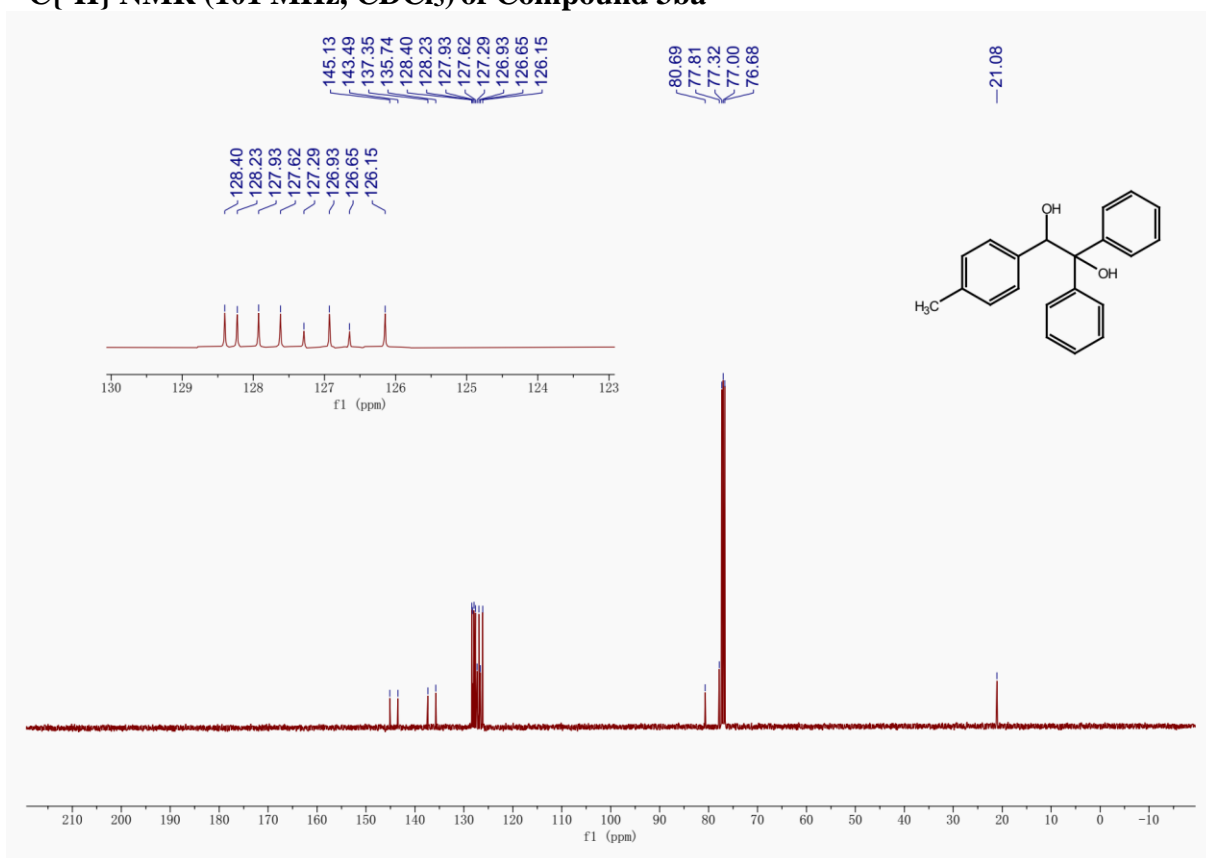

### $^1\text{H}$ NMR (400 MHz, $\text{CDCl}_3$ ) of Compound 3ca

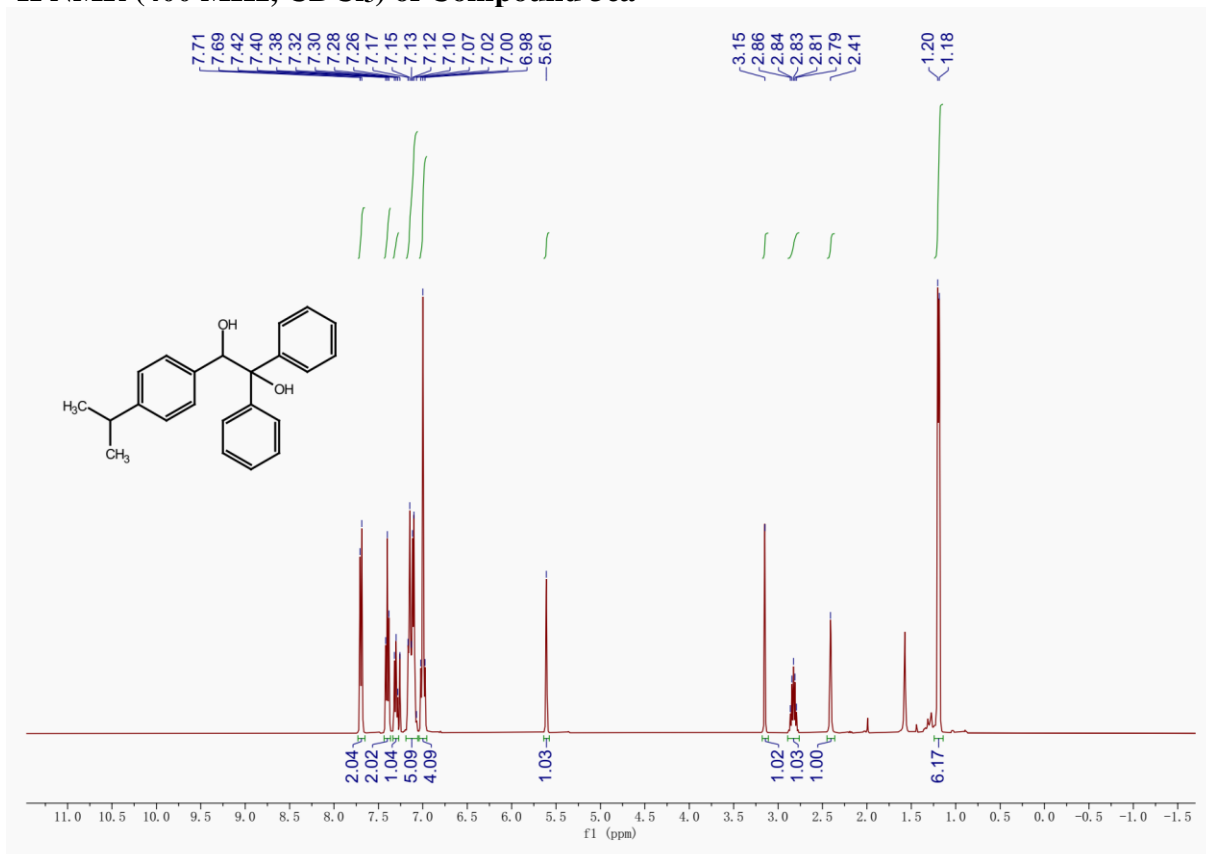

### $^{13}\text{C}\{^1\text{H}\}$ NMR (101 MHz, $\text{CDCl}_3$ ) of Compound 3ca

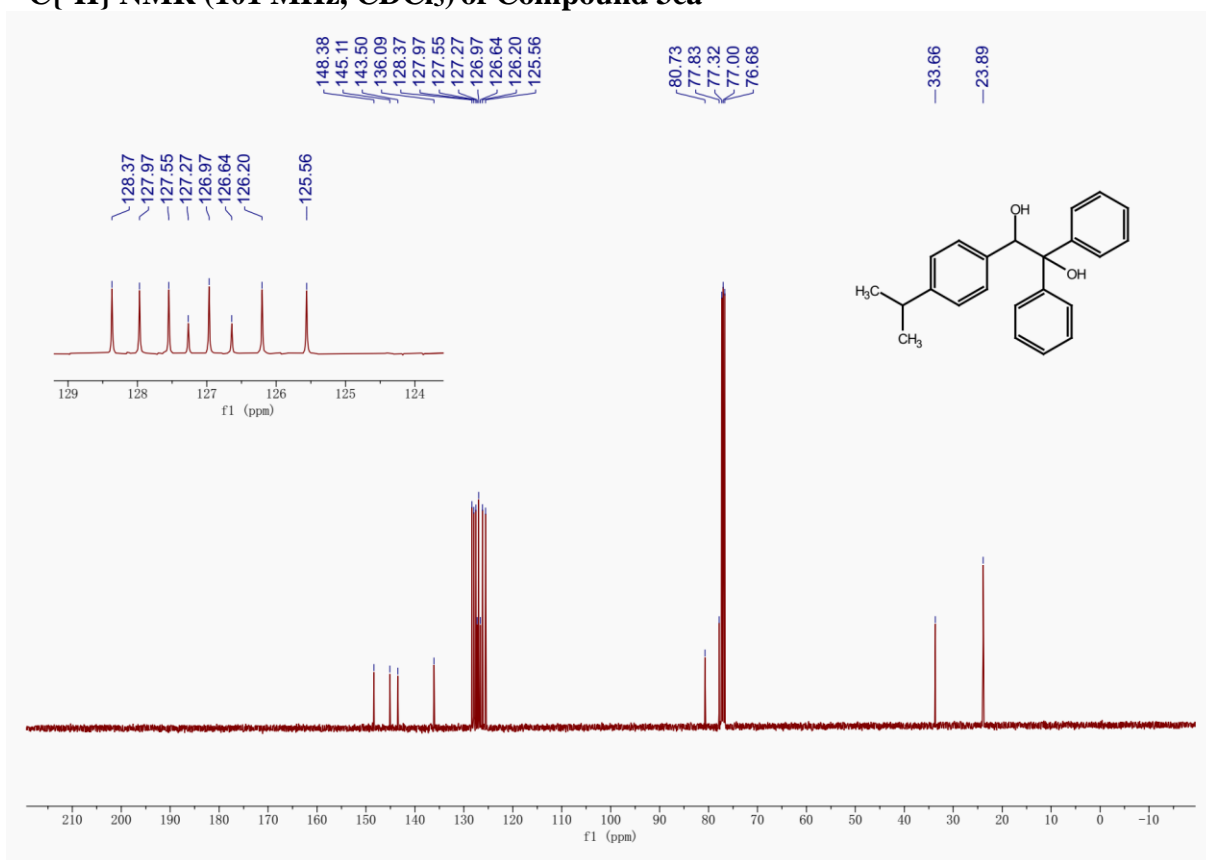

### $^1\text{H}$ NMR (400 MHz, $\text{CDCl}_3$ ) of Compound 3da

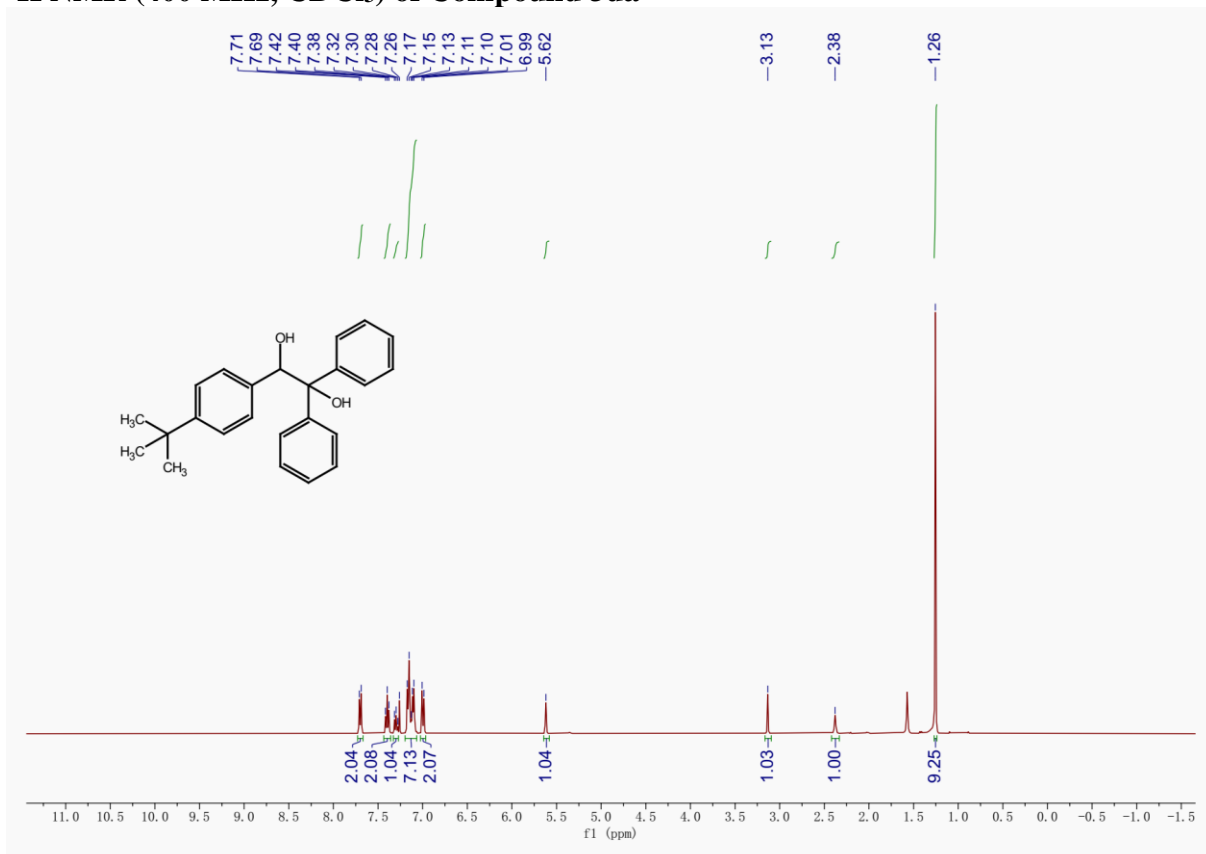

### $^{13}\text{C}\{^1\text{H}\}$ NMR (101 MHz, $\text{CDCl}_3$ ) of Compound 3da

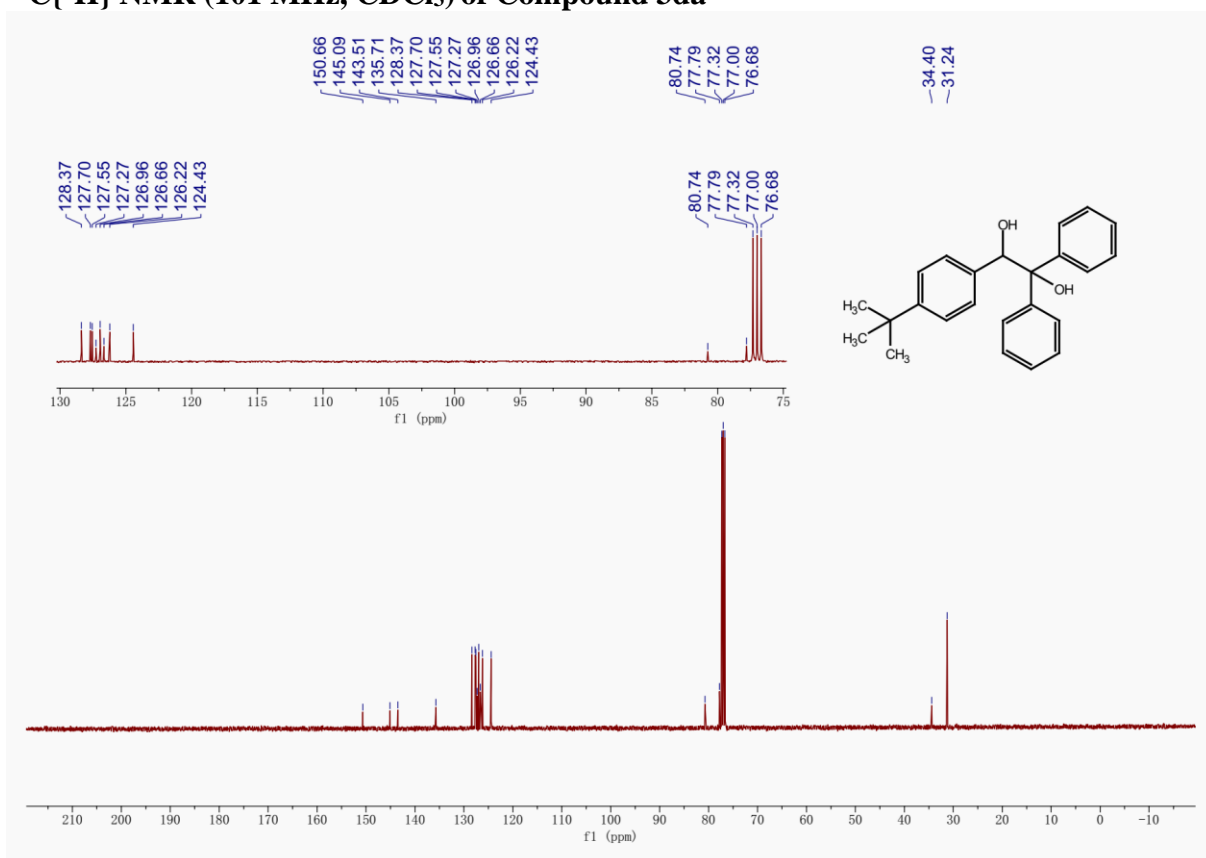

### $^1\text{H}$ NMR (400 MHz, $\text{CDCl}_3$ ) of Compound 3ea

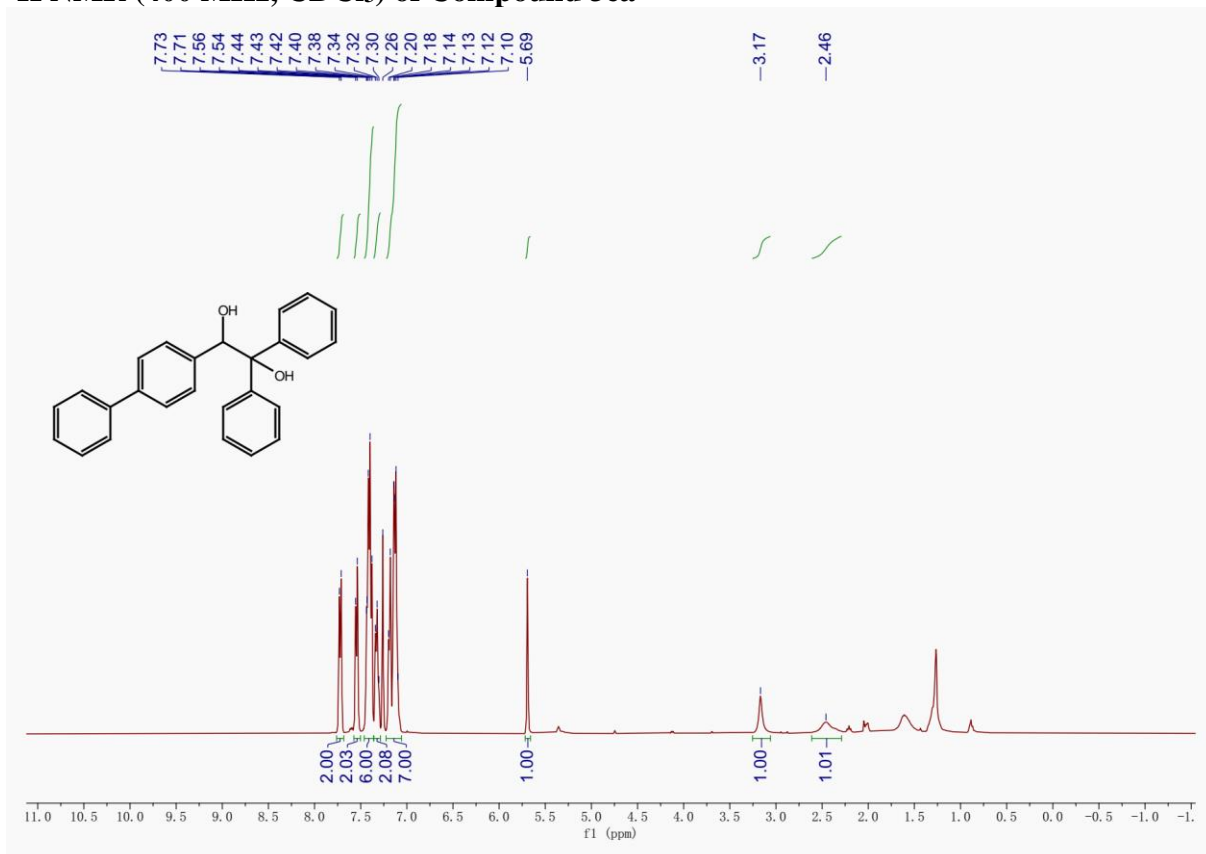

### $^{13}\text{C}\{^1\text{H}\}$ NMR (101 MHz, $\text{CDCl}_3$ ) of Compound 3ea

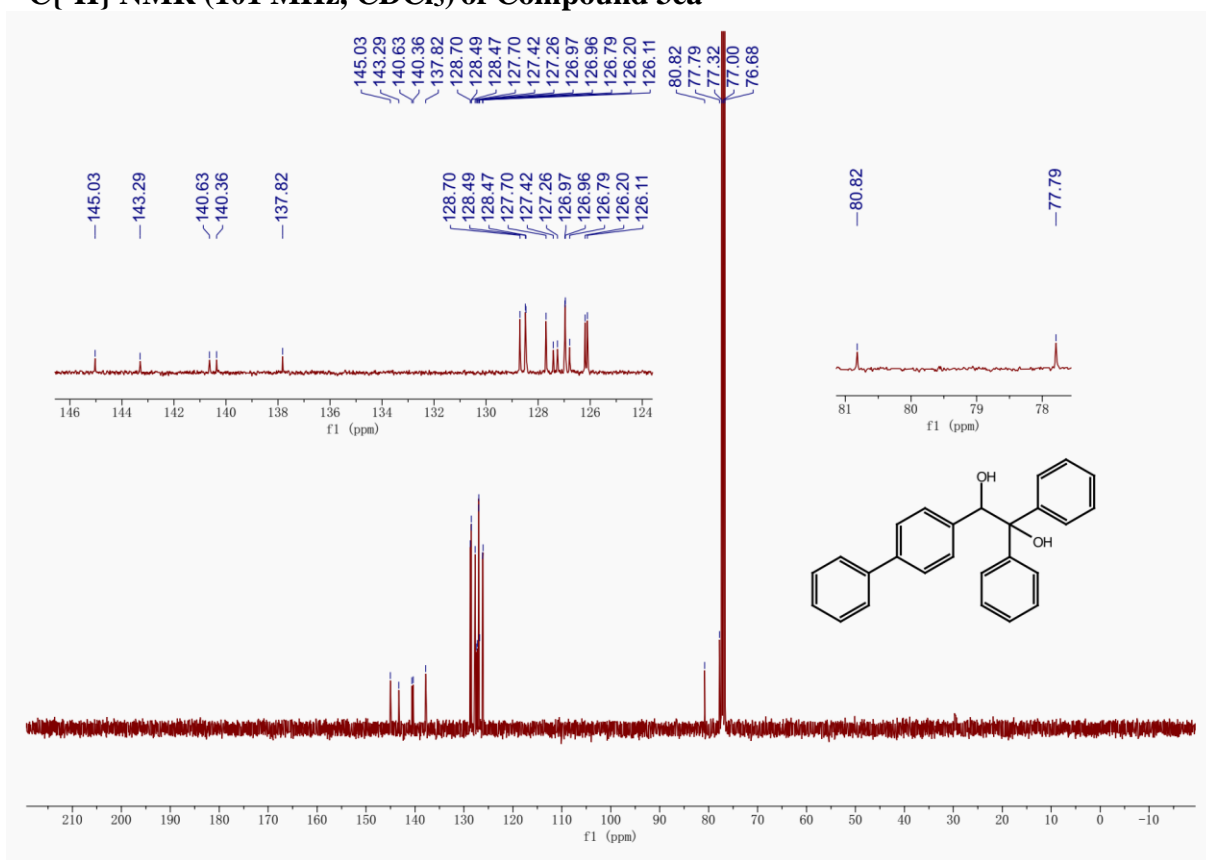

### $^1\text{H}$ NMR (400 MHz, $\text{DMSO-}d_6$ ) of Compound 3fa

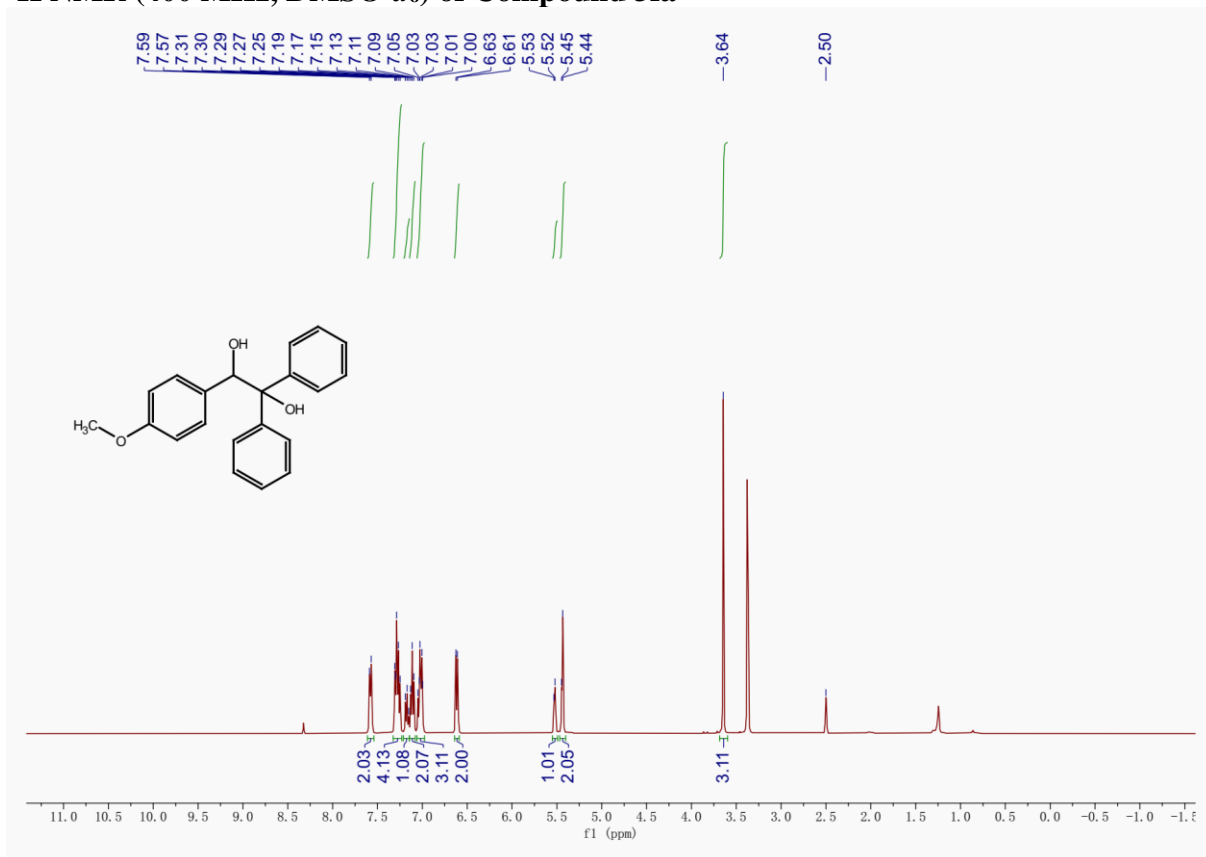

### $^{13}\text{C}\{^1\text{H}\}$ NMR (101 MHz, $\text{DMSO-}d_6$ ) of Compound 3fa

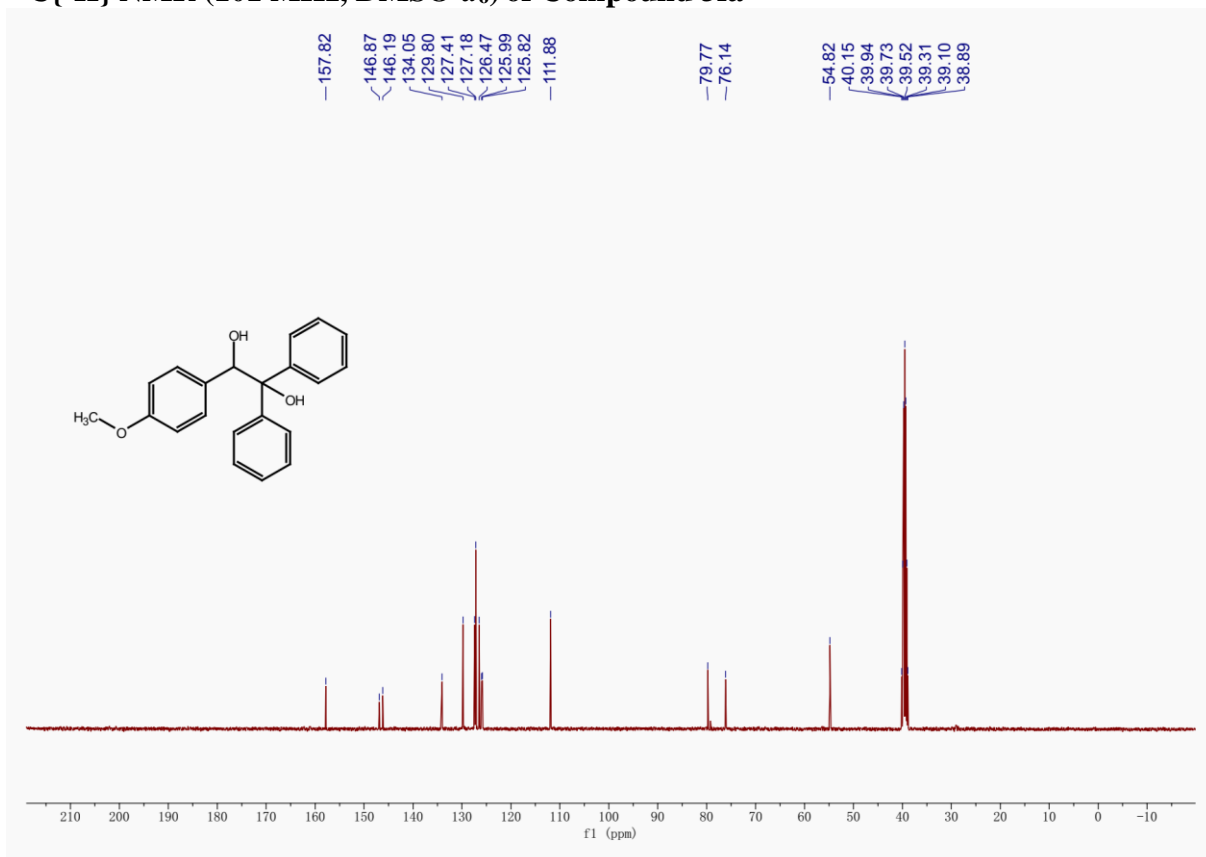

### $^1\text{H}$ NMR (400 MHz, $\text{CDCl}_3$ ) of Compound 3ga

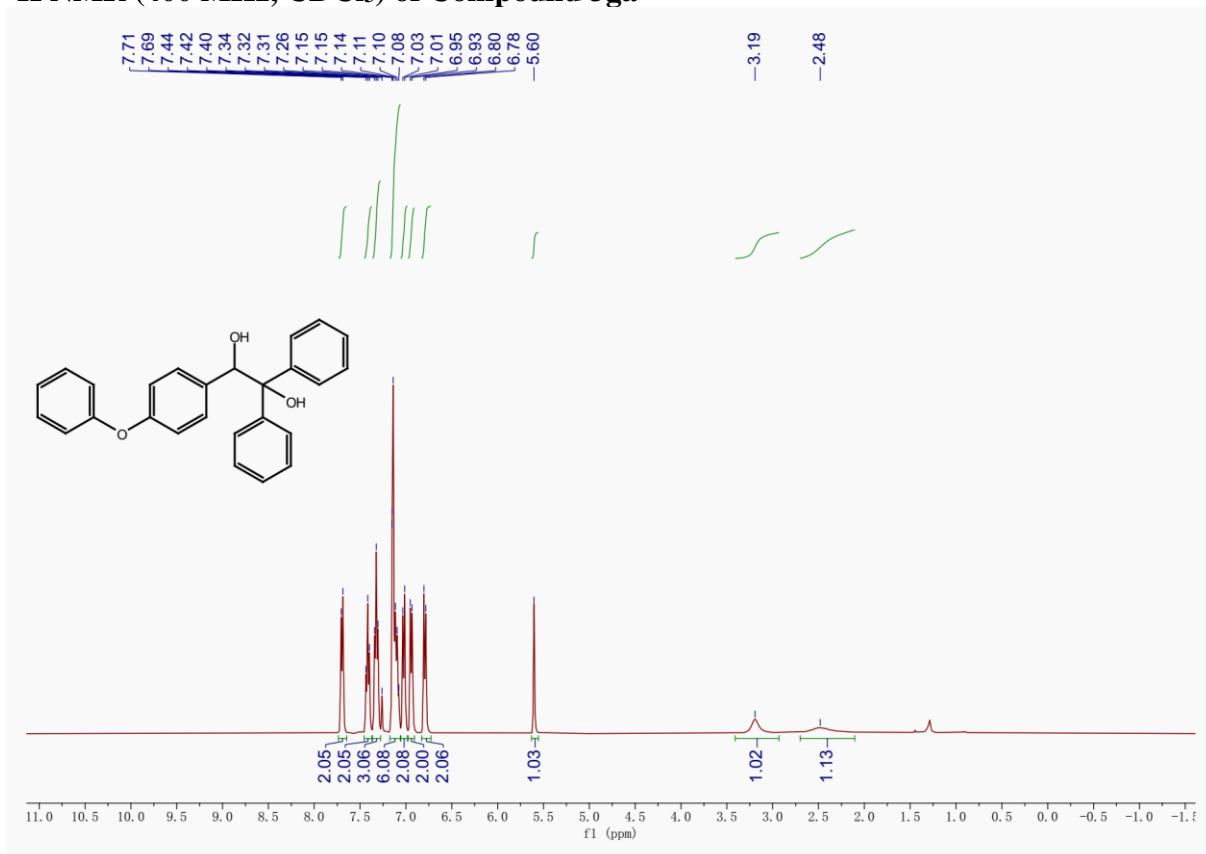

### $^{13}\text{C}\{^1\text{H}\}$ NMR (101 MHz, $\text{CDCl}_3$ ) of Compound 3ga

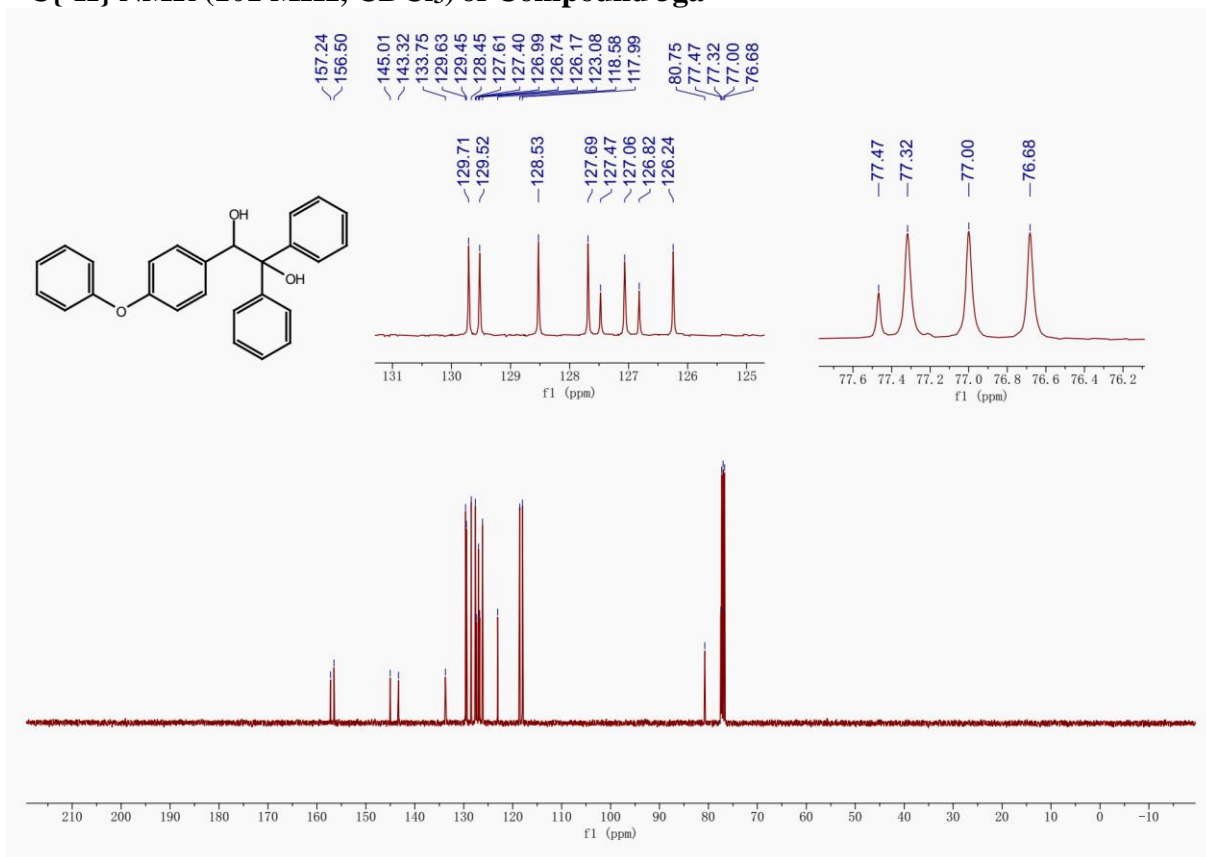



### $^1\text{H}$ NMR (400 MHz, $\text{CDCl}_3$ ) of Compound 3ha

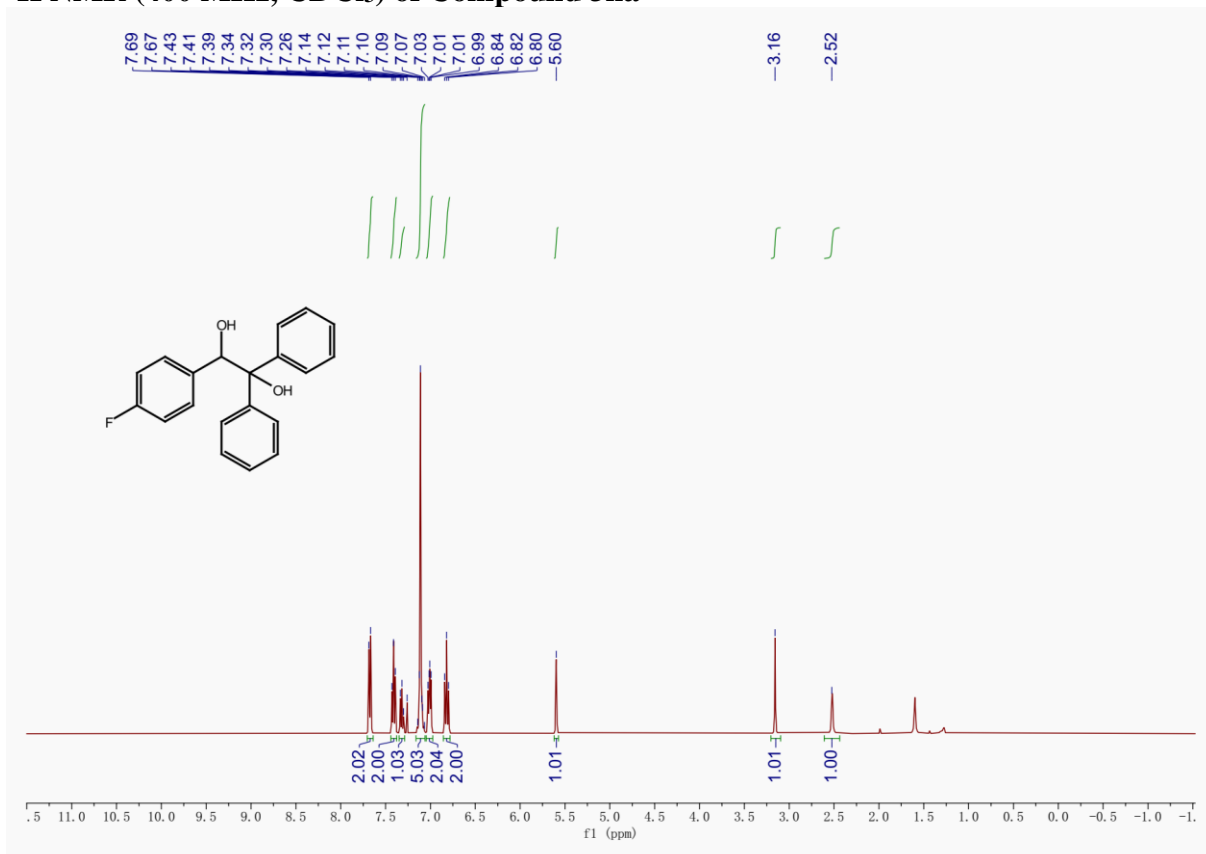

### $^{13}\text{C}\{^1\text{H}\}$ NMR (101 MHz, $\text{CDCl}_3$ ) of Compound 3ha

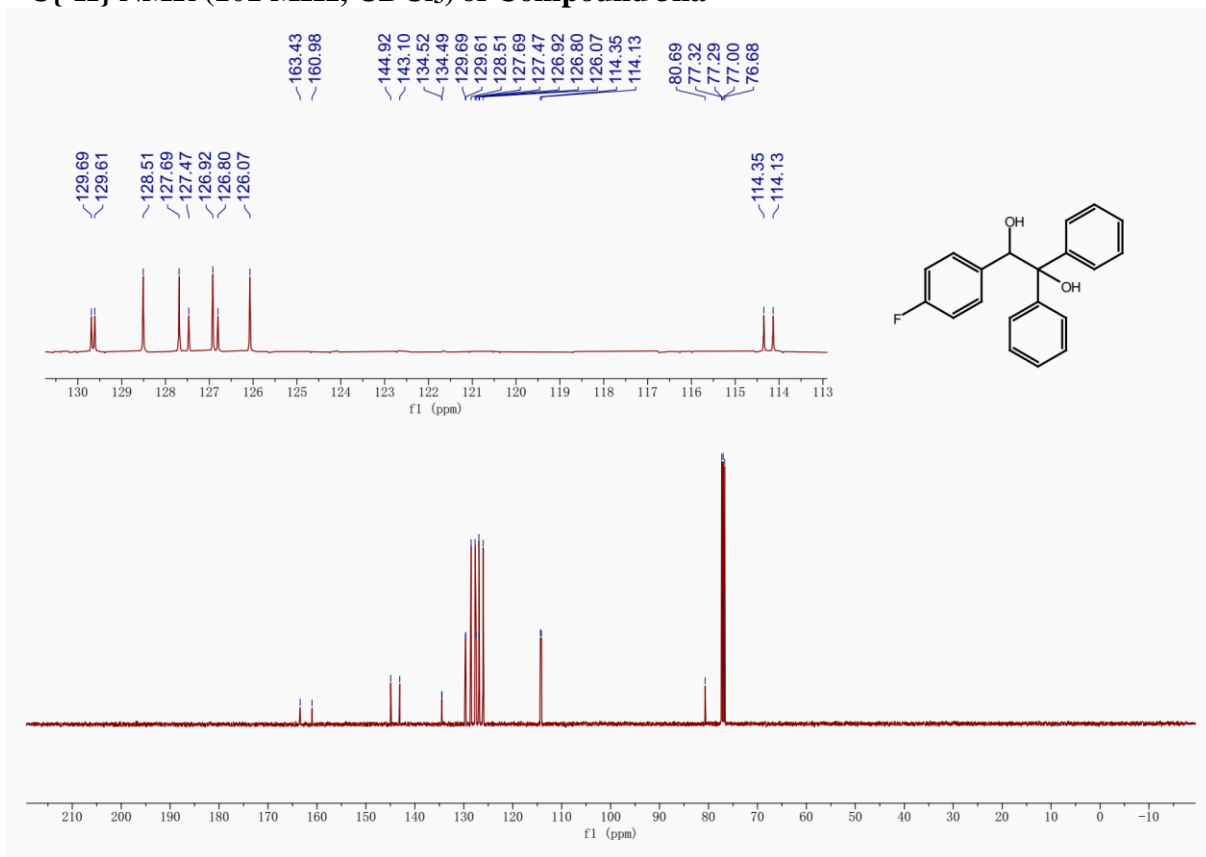

**<sup>19</sup>F NMR (376 MHz, CDCl<sub>3</sub>) of Compound 3ha**

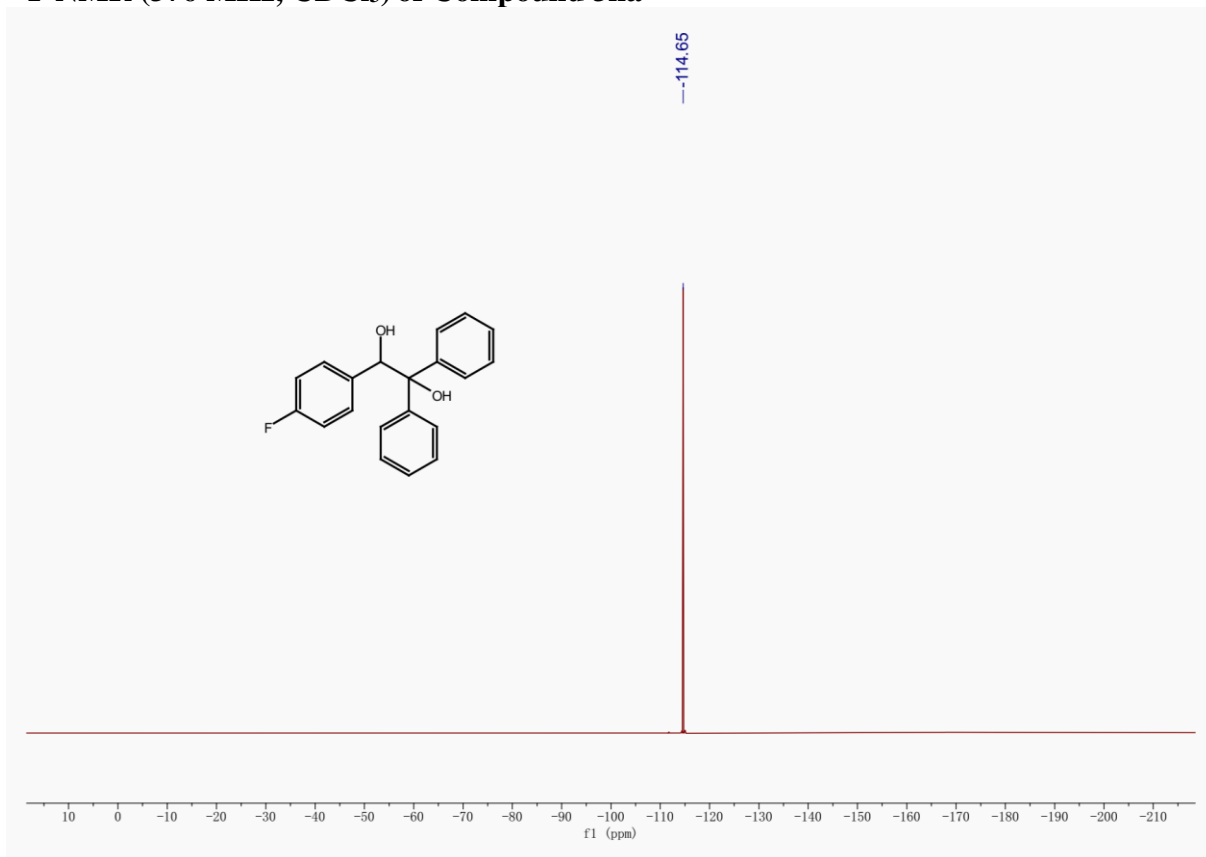

### $^1\text{H}$ NMR (400 MHz, $\text{CDCl}_3$ ) of Compound 3ia

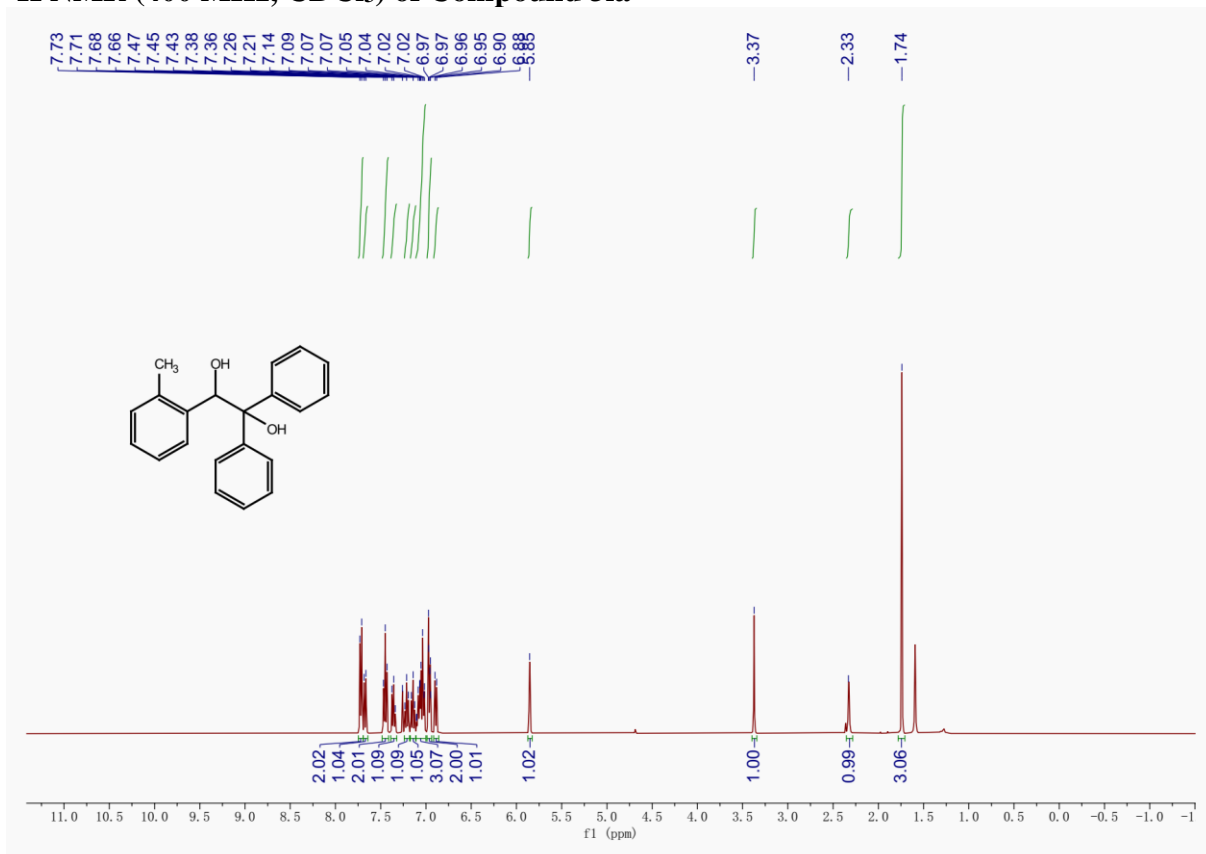

### $^{13}\text{C}\{^1\text{H}\}$ NMR (101 MHz, $\text{CDCl}_3$ ) of Compound 3ia

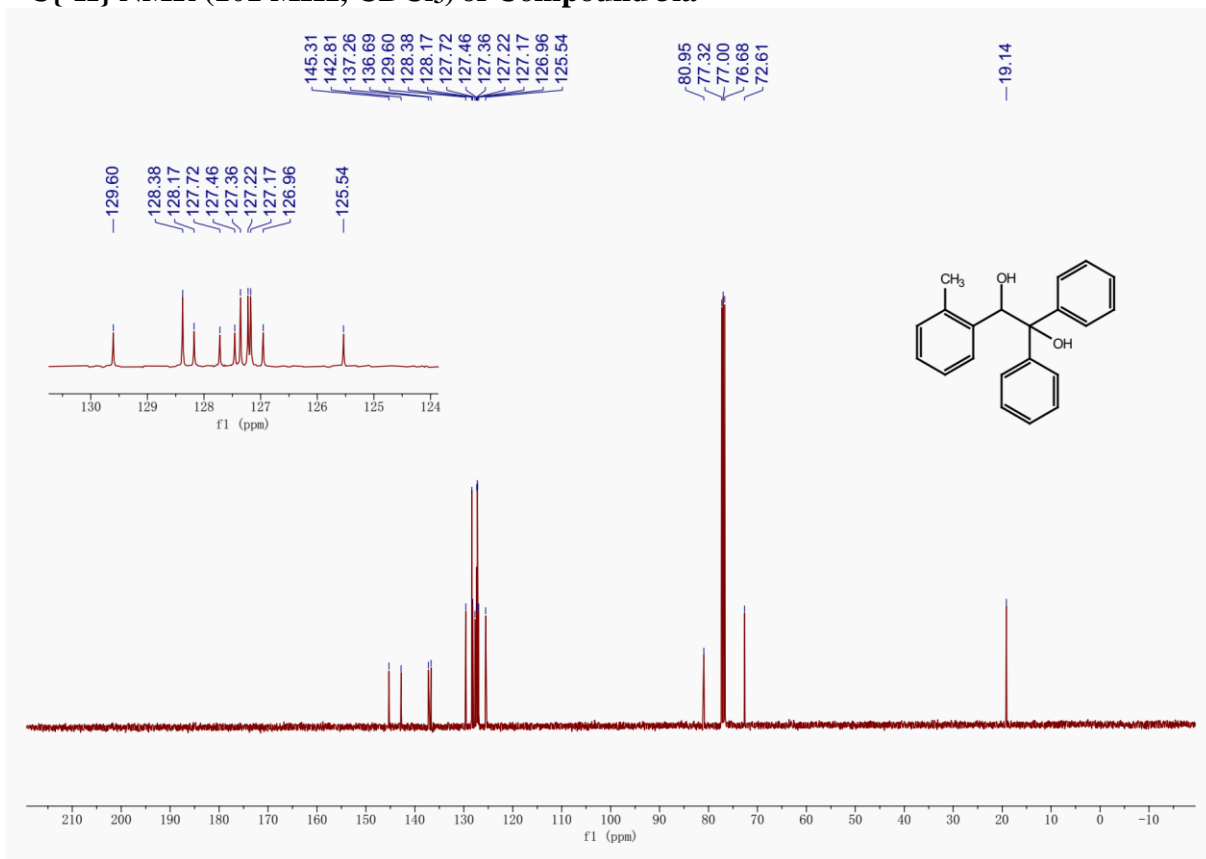

### $^1\text{H}$ NMR (400 MHz, $\text{CDCl}_3$ ) of Compound 3ja

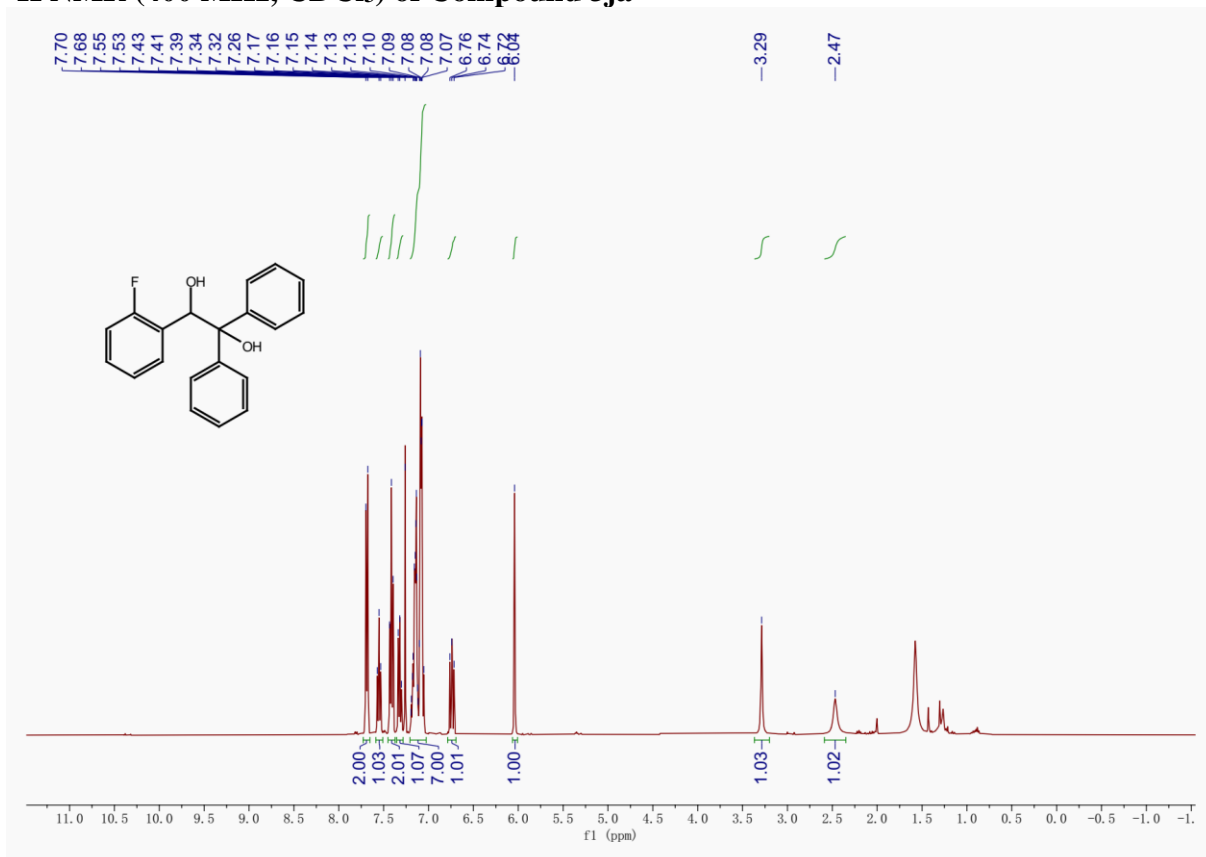

### $^{13}\text{C}\{^1\text{H}\}$ NMR (101 MHz, $\text{CDCl}_3$ ) of Compound 3ja

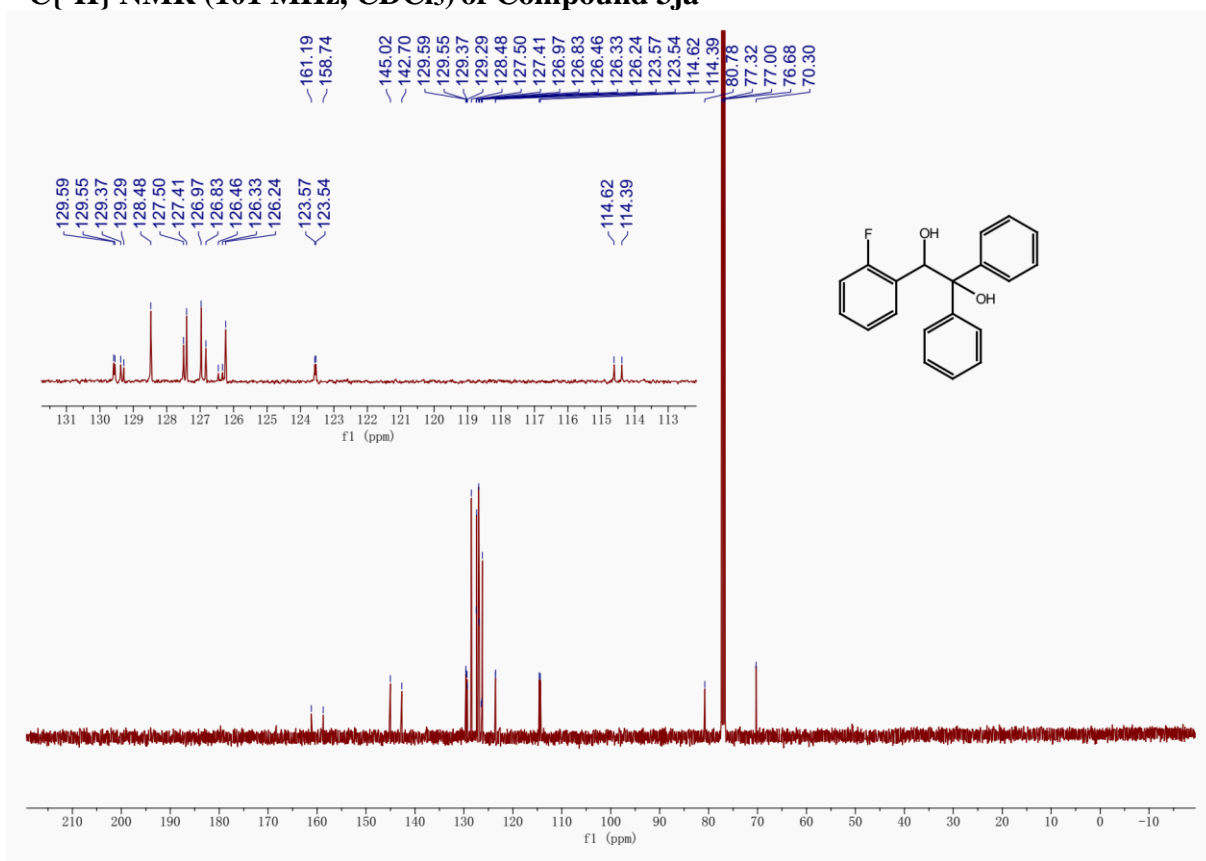

**<sup>19</sup>F NMR (376 MHz, CDCl<sub>3</sub>) of Compound 3ja**

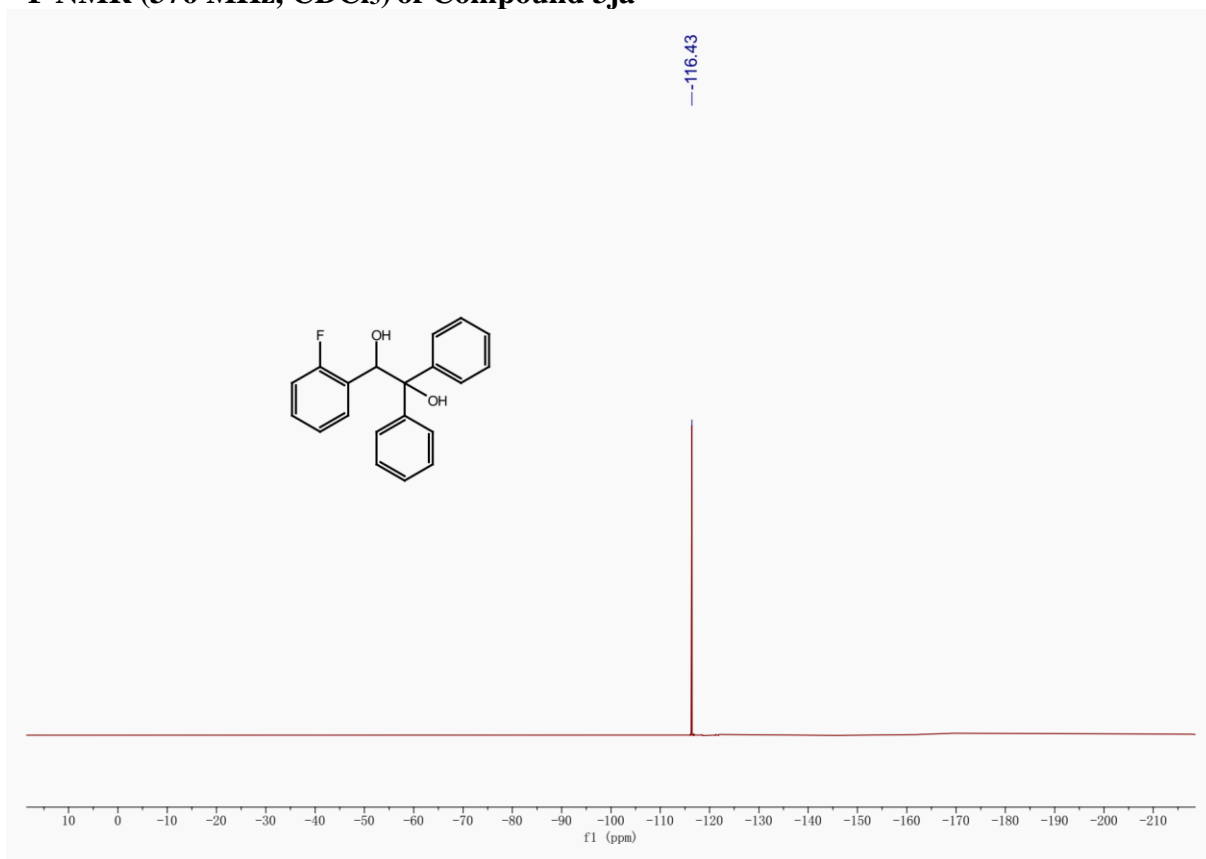

### $^1\text{H}$ NMR (400 MHz, $\text{CDCl}_3$ ) of Compound 3ka

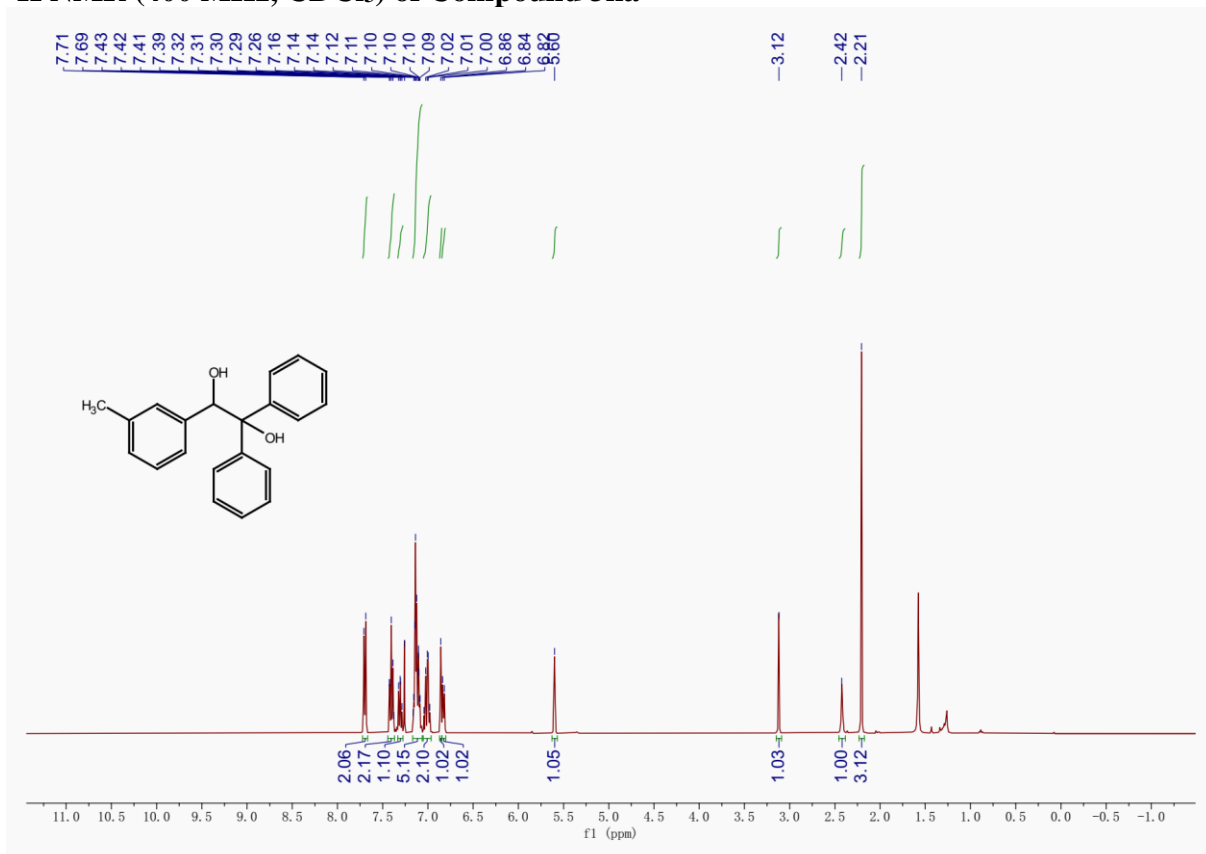

### $^{13}\text{C}\{^1\text{H}\}$ NMR (101 MHz, $\text{CDCl}_3$ ) of Compound 3ka

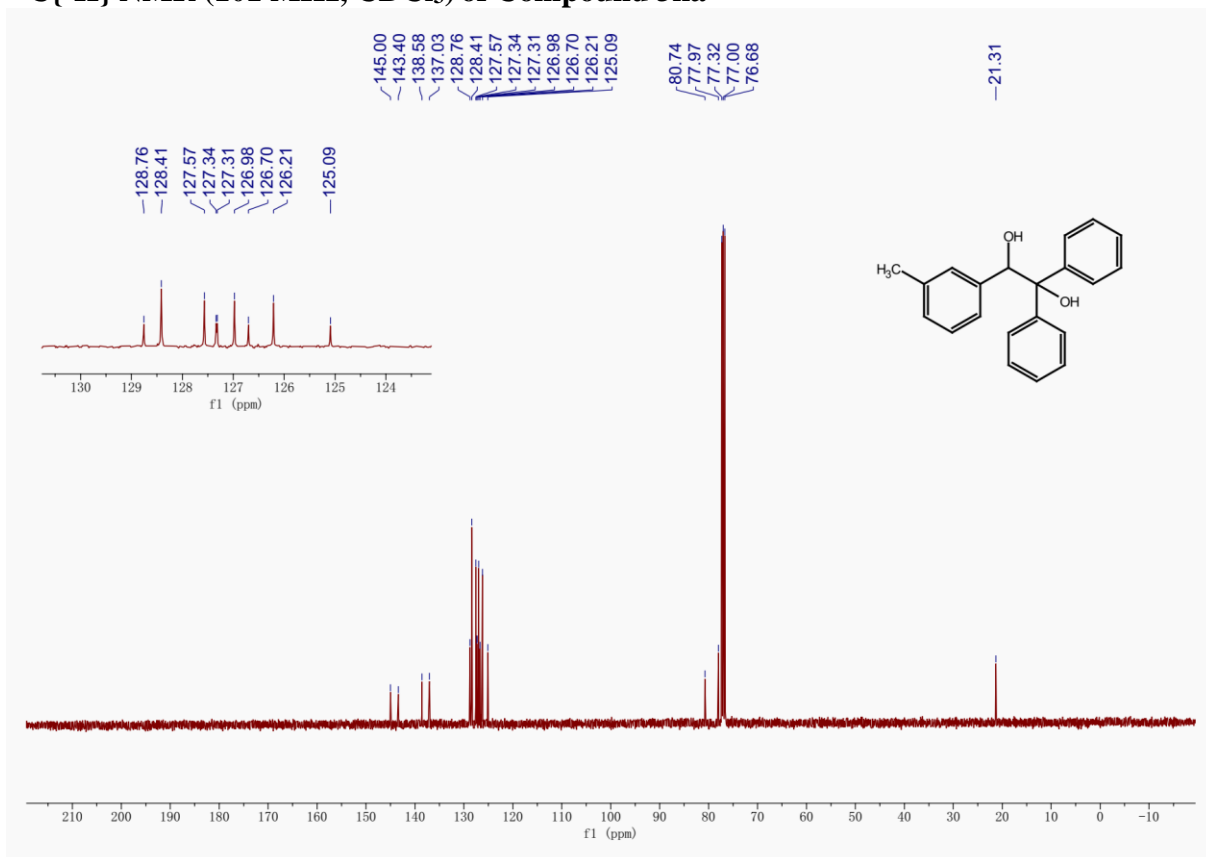

### $^1\text{H}$ NMR (400 MHz, $\text{CDCl}_3$ ) of Compound 3la

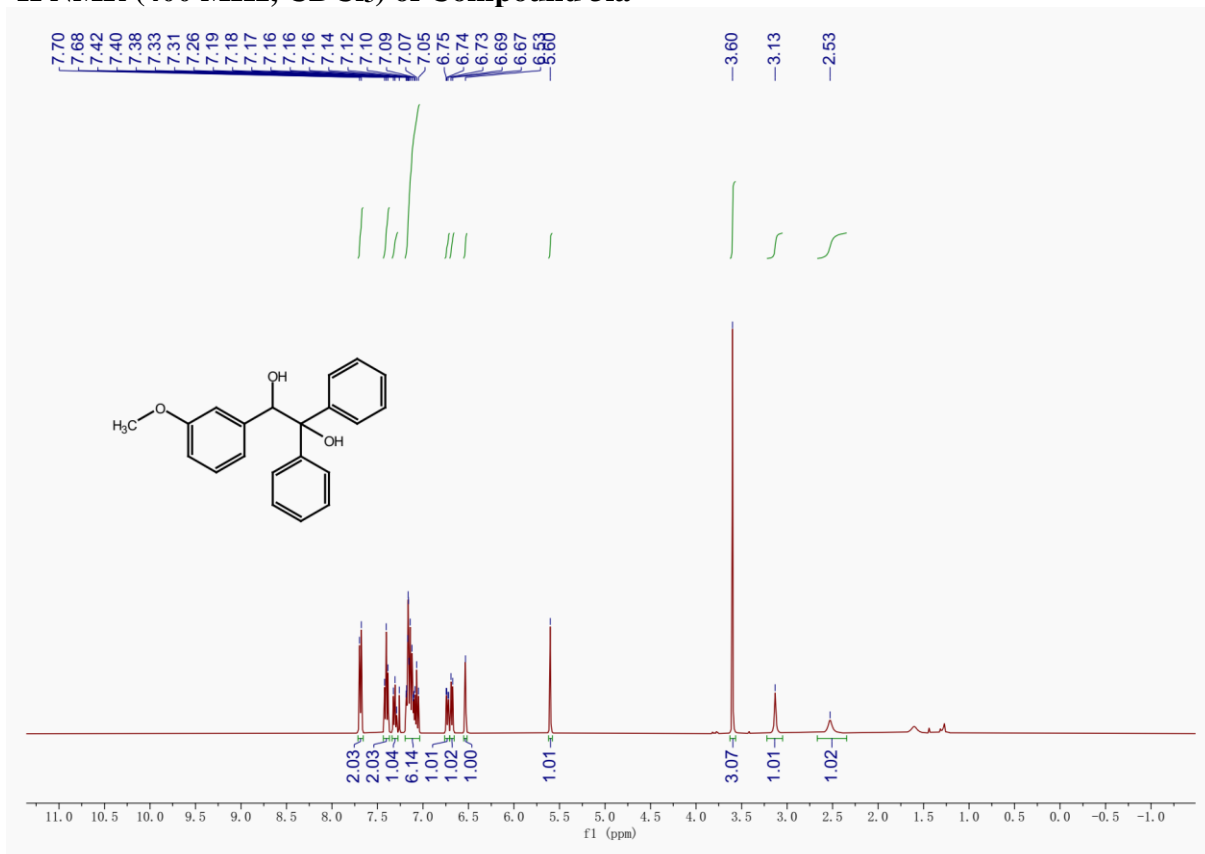

### $^{13}\text{C}\{^1\text{H}\}$ NMR (101 MHz, $\text{CDCl}_3$ ) of Compound 3la

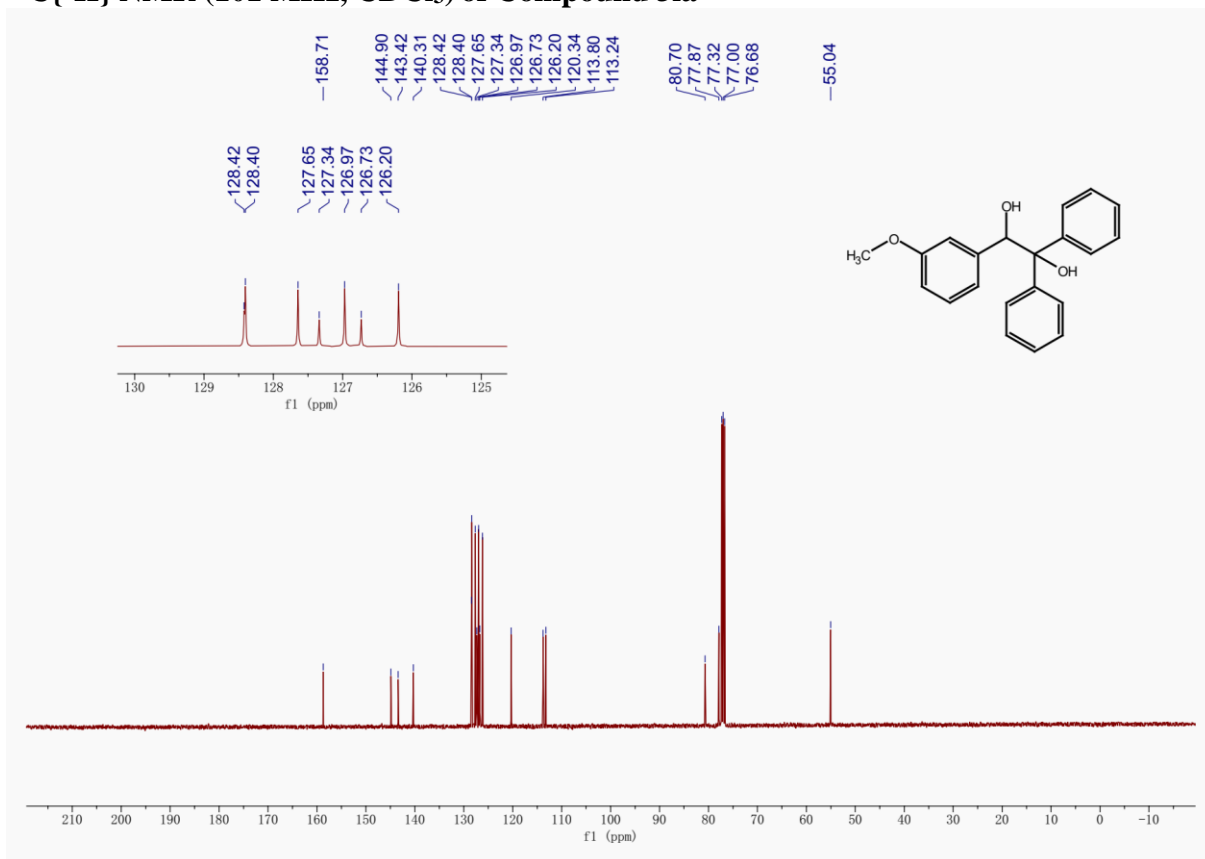

### $^1\text{H}$ NMR (400 MHz, $\text{CDCl}_3$ ) of Compound 3ma

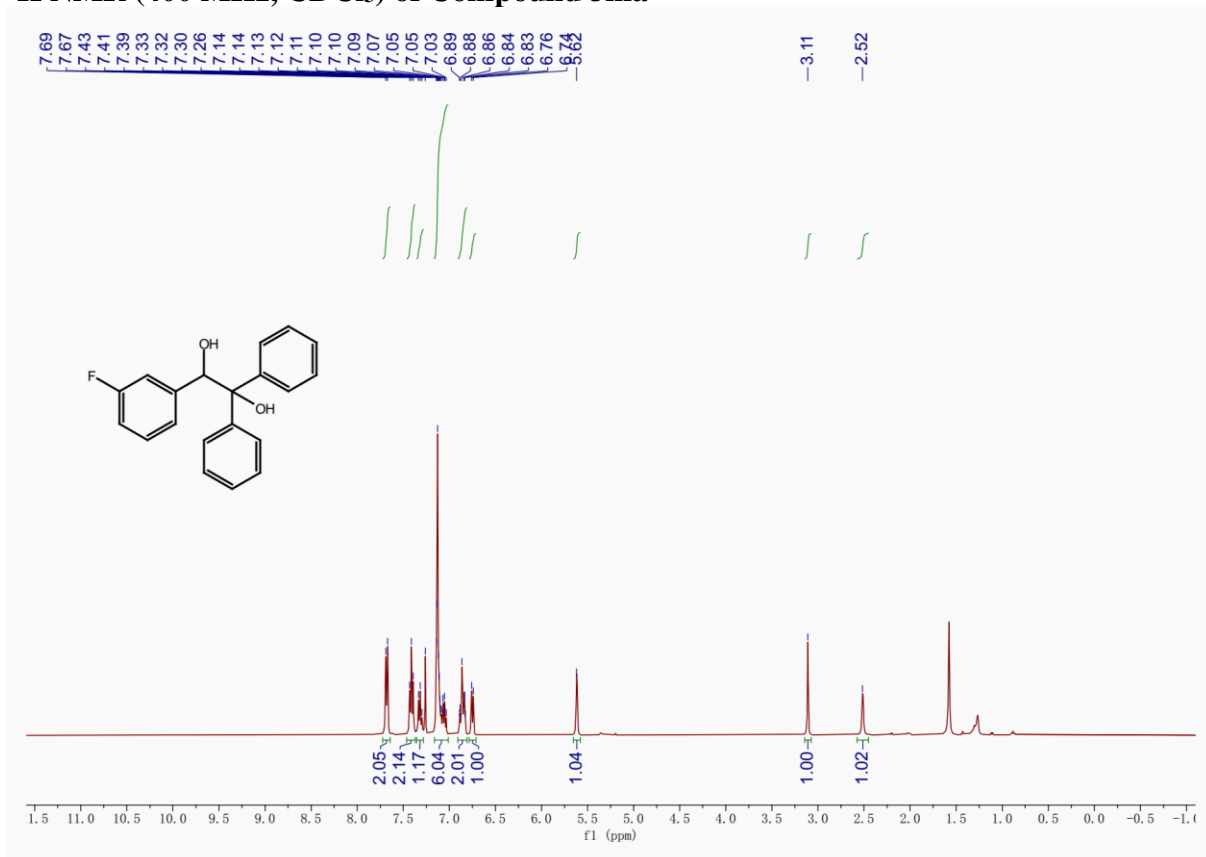

### $^{13}\text{C}\{^1\text{H}\}$ NMR (101 MHz, $\text{CDCl}_3$ ) of Compound 3ma

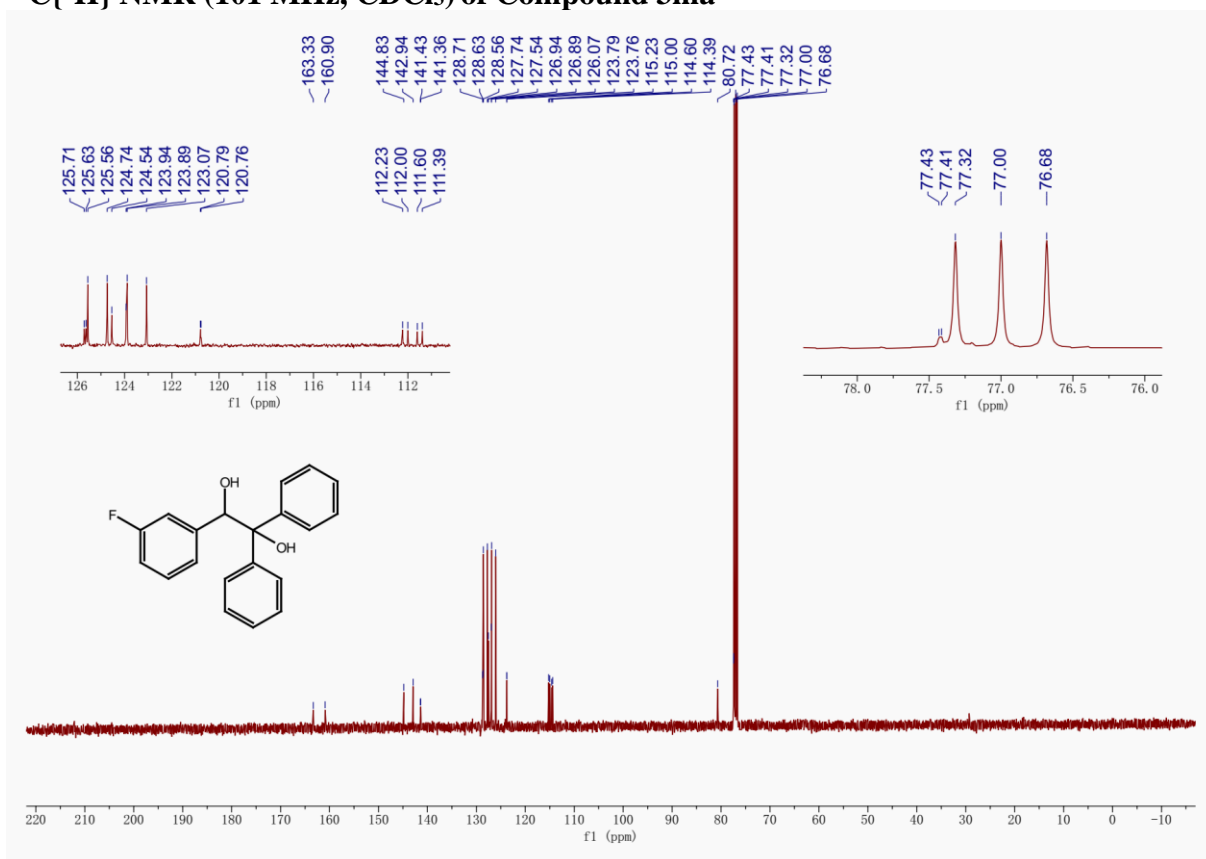



**<sup>19</sup>F NMR (376 MHz, CDCl<sub>3</sub>) of Compound 3ma**

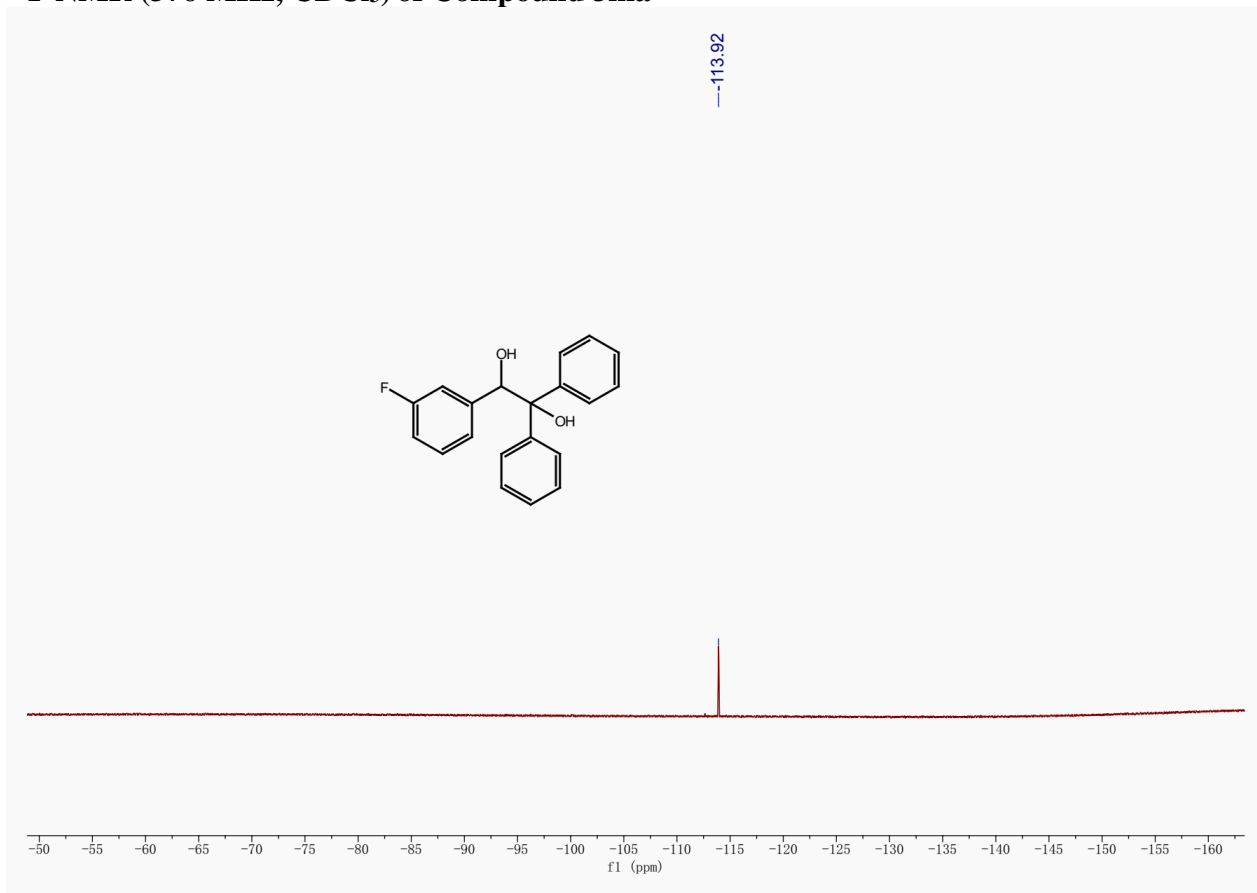

### $^1\text{H}$ NMR (400 MHz, $\text{CDCl}_3$ ) of Compound 3na

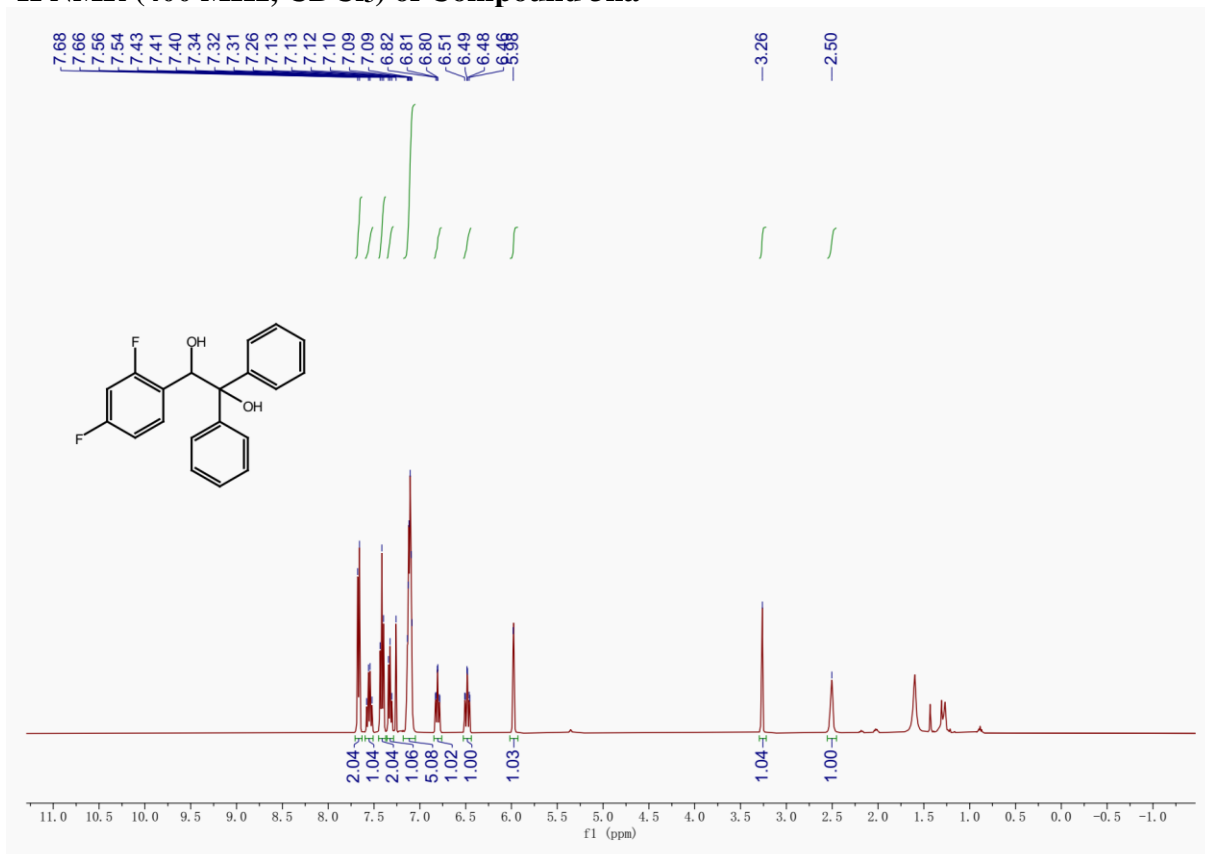

### $^{13}\text{C}\{^1\text{H}\}$ NMR (101 MHz, $\text{CDCl}_3$ ) of Compound 3na

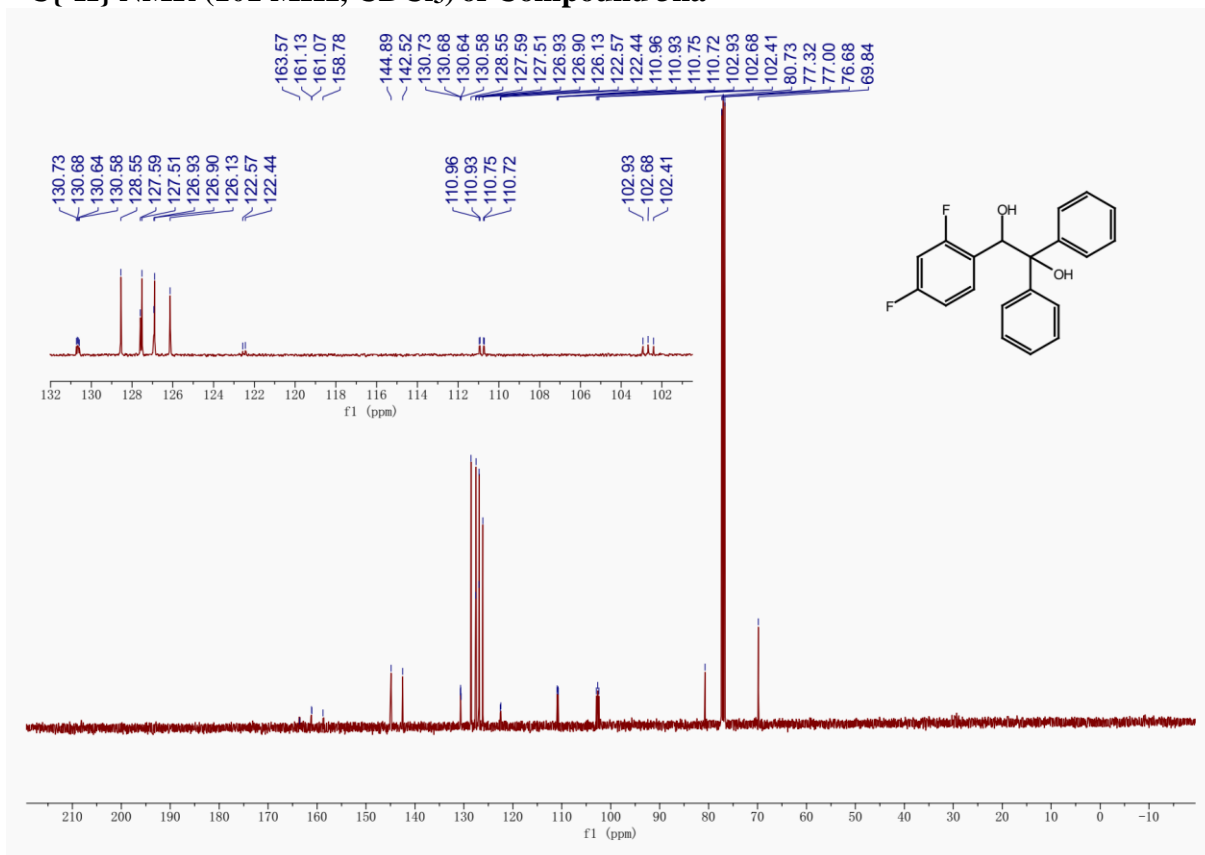

**<sup>19</sup>F NMR (376 MHz, CDCl<sub>3</sub>) of Compound 3na**

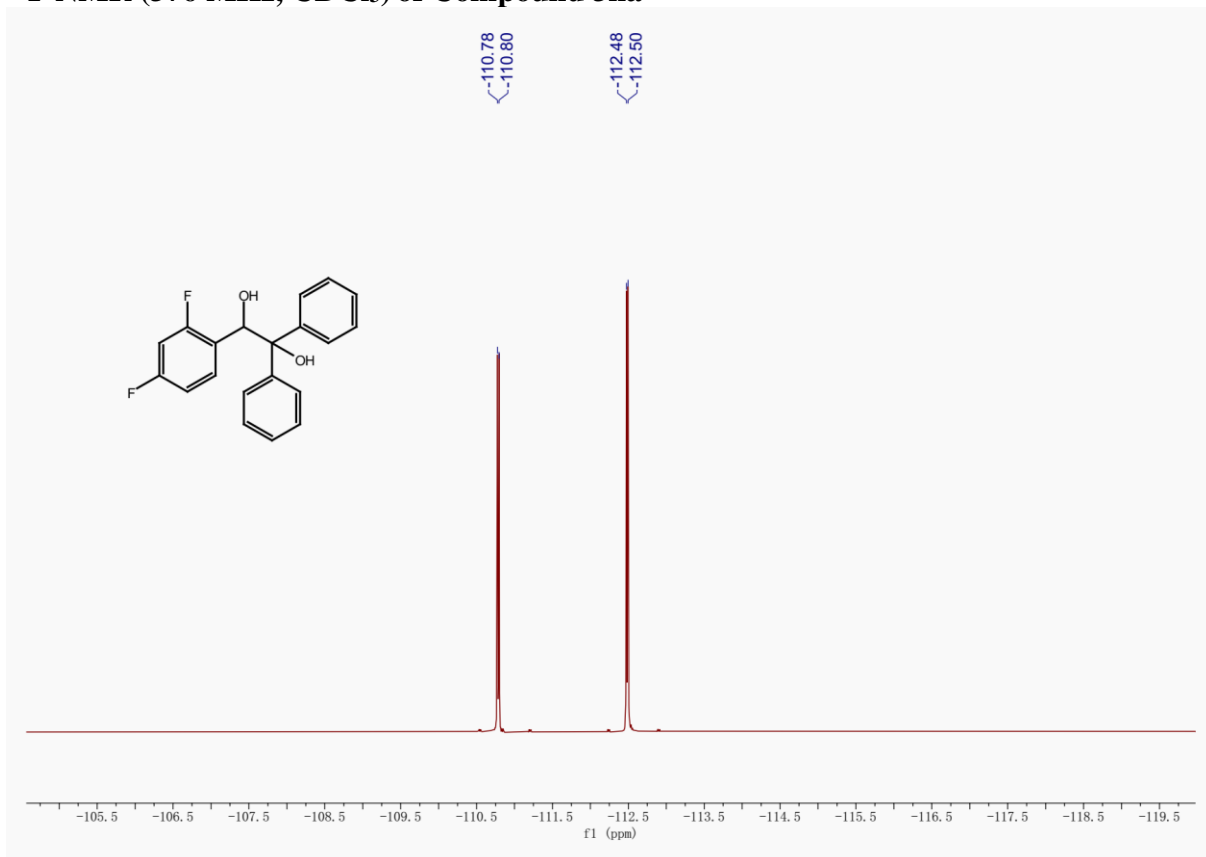

### $^1\text{H}$ NMR (400 MHz, $\text{CDCl}_3$ ) of Compound 30a

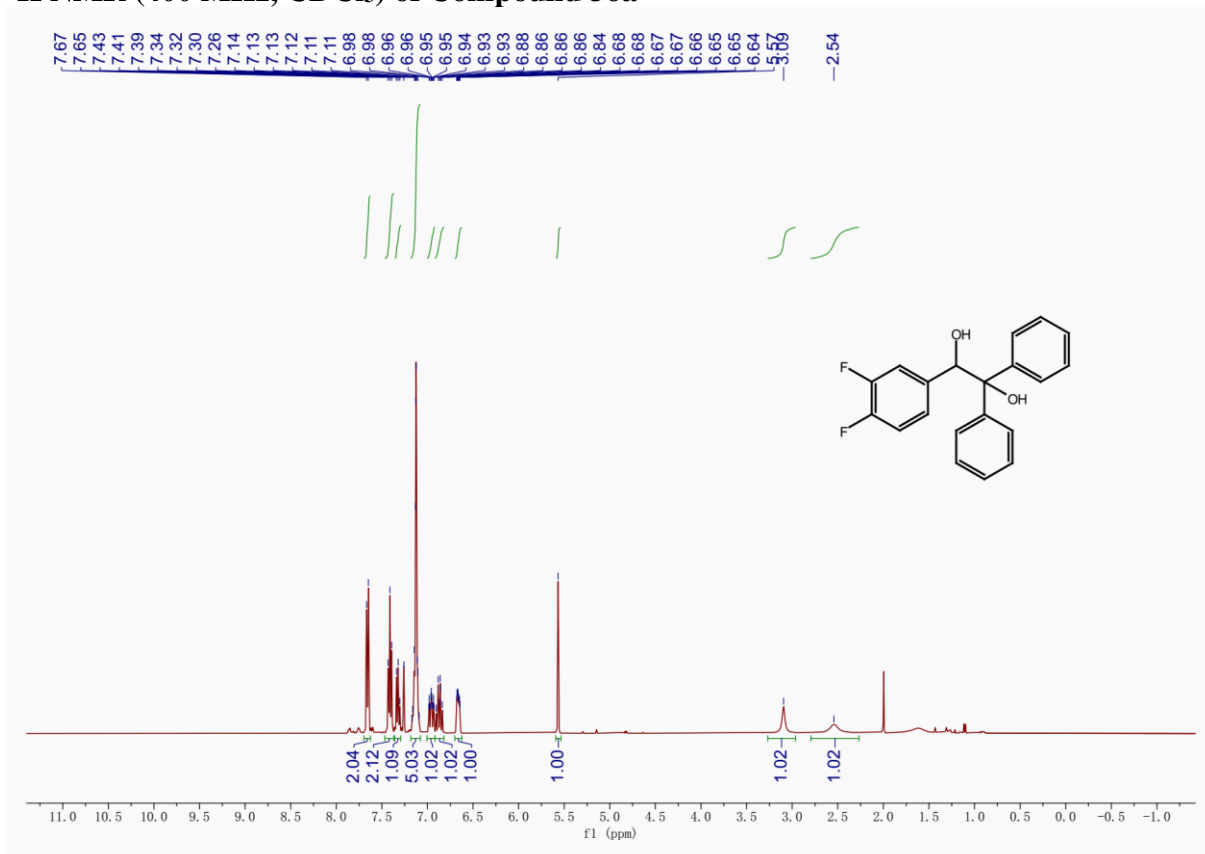

### $^{13}\text{C}\{^1\text{H}\}$ NMR (101 MHz, $\text{CDCl}_3$ ) of Compound 30a

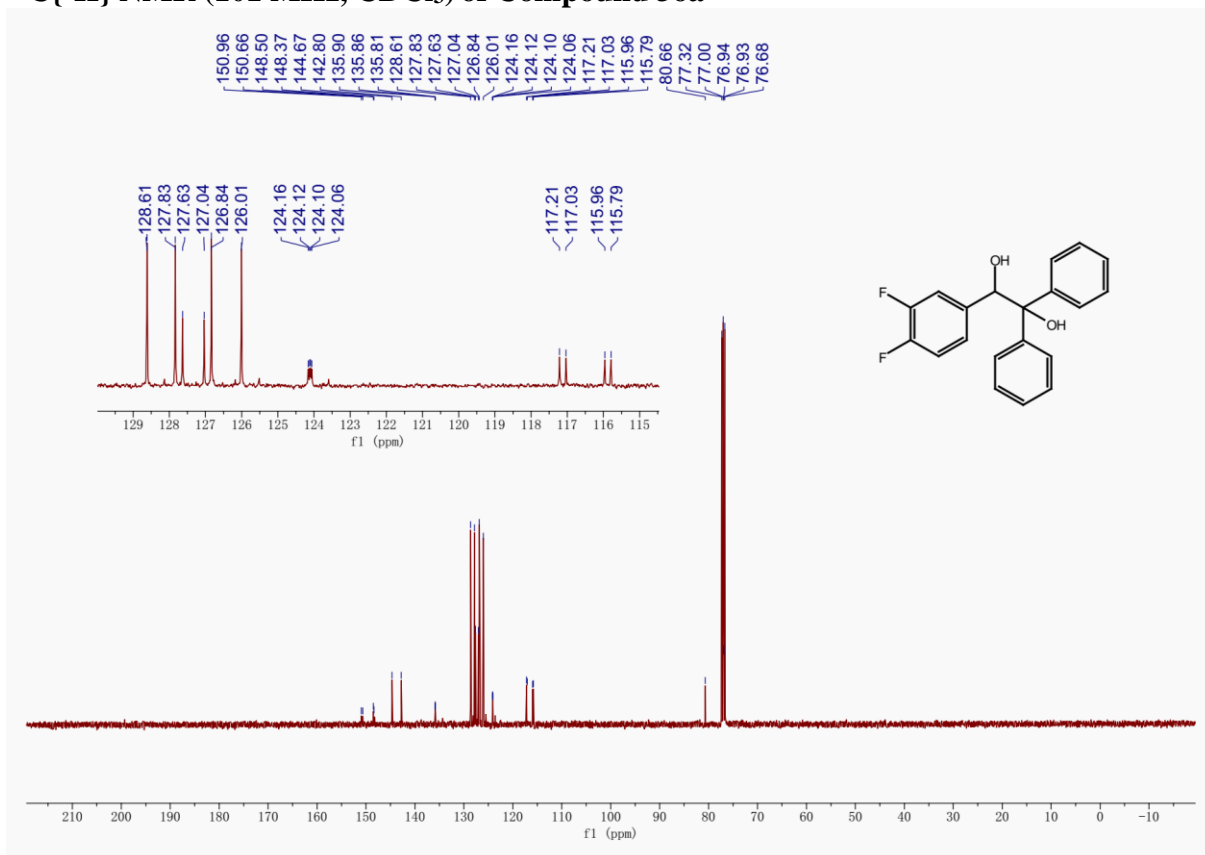

**$^{19}\text{F}$  NMR (376 MHz,  $\text{CDCl}_3$ ) of Compound 30a**

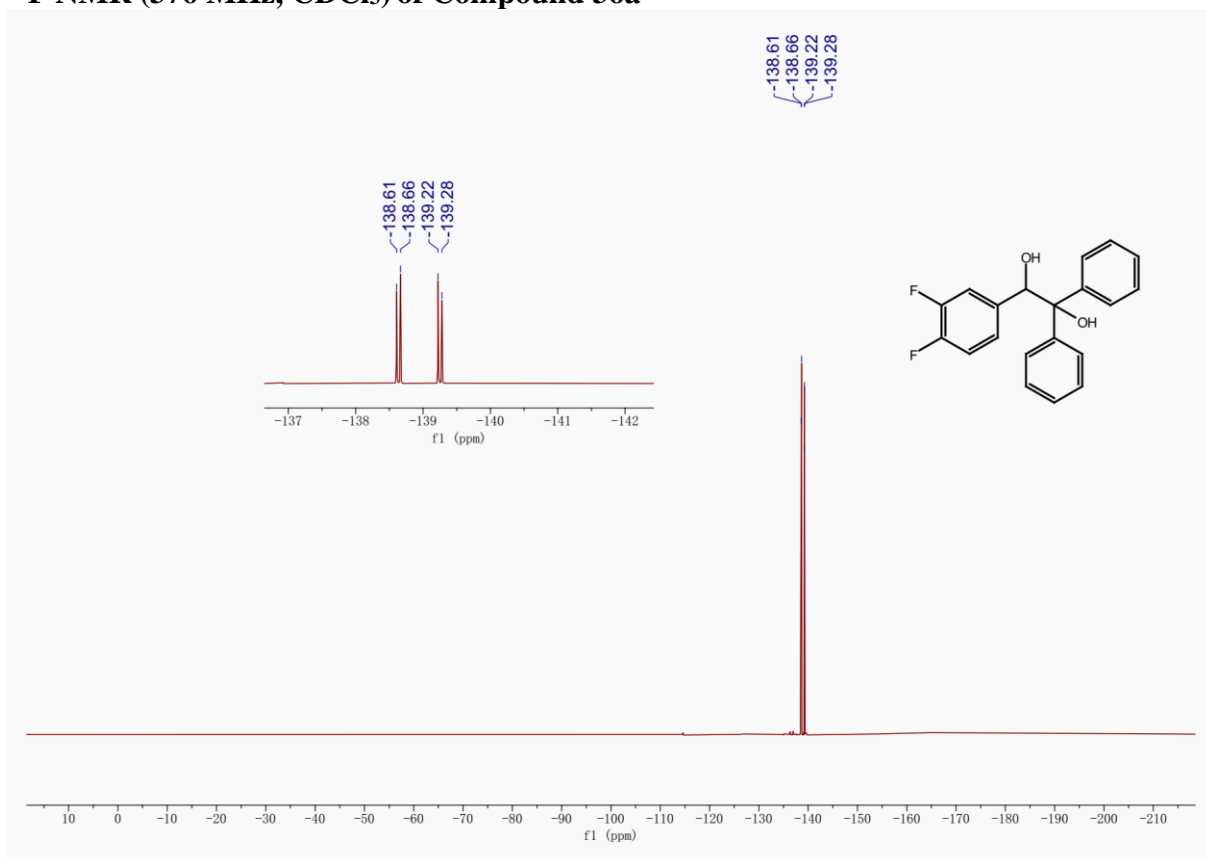



### $^1\text{H}$ NMR (400 MHz, $\text{DMSO-}d_6$ ) of Compound 3qa

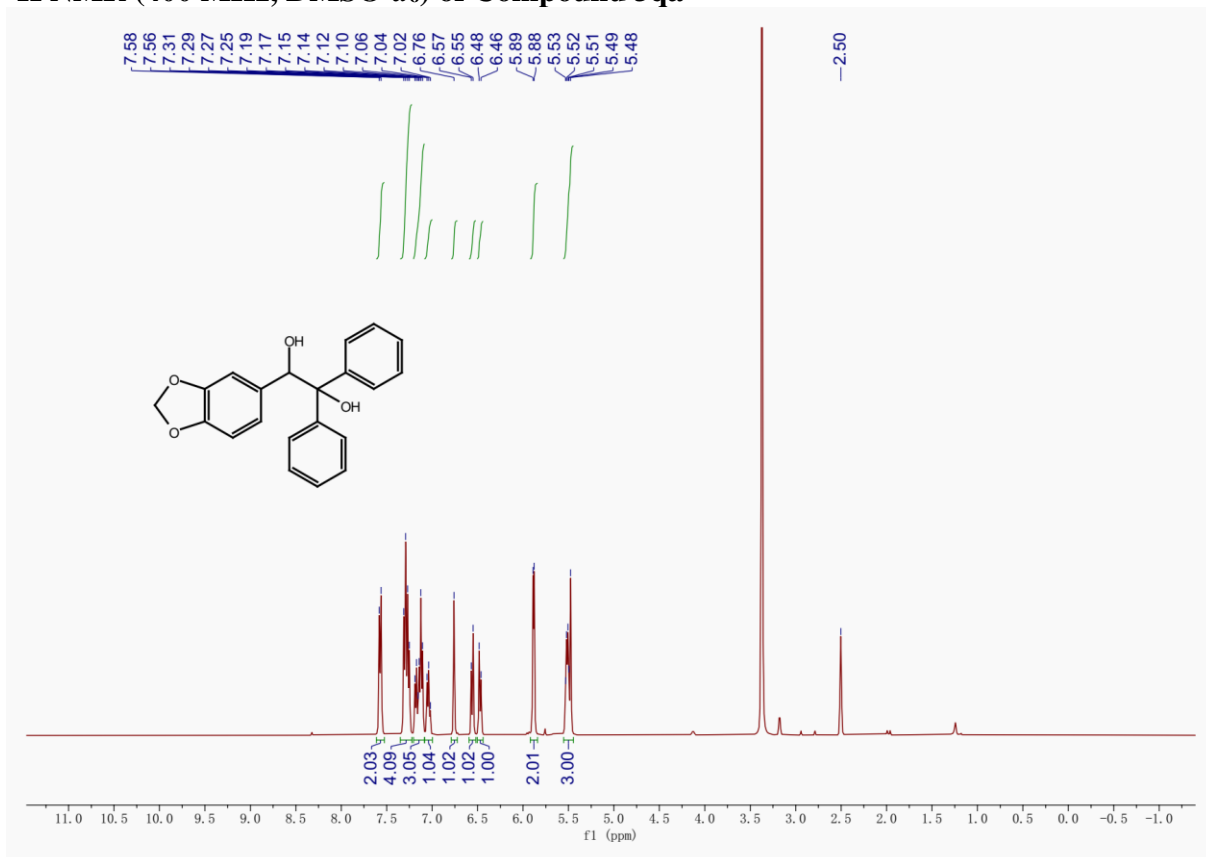

### $^{13}\text{C}\{^1\text{H}\}$ NMR (101 MHz, $\text{DMSO-}d_6$ ) of Compound 3qa

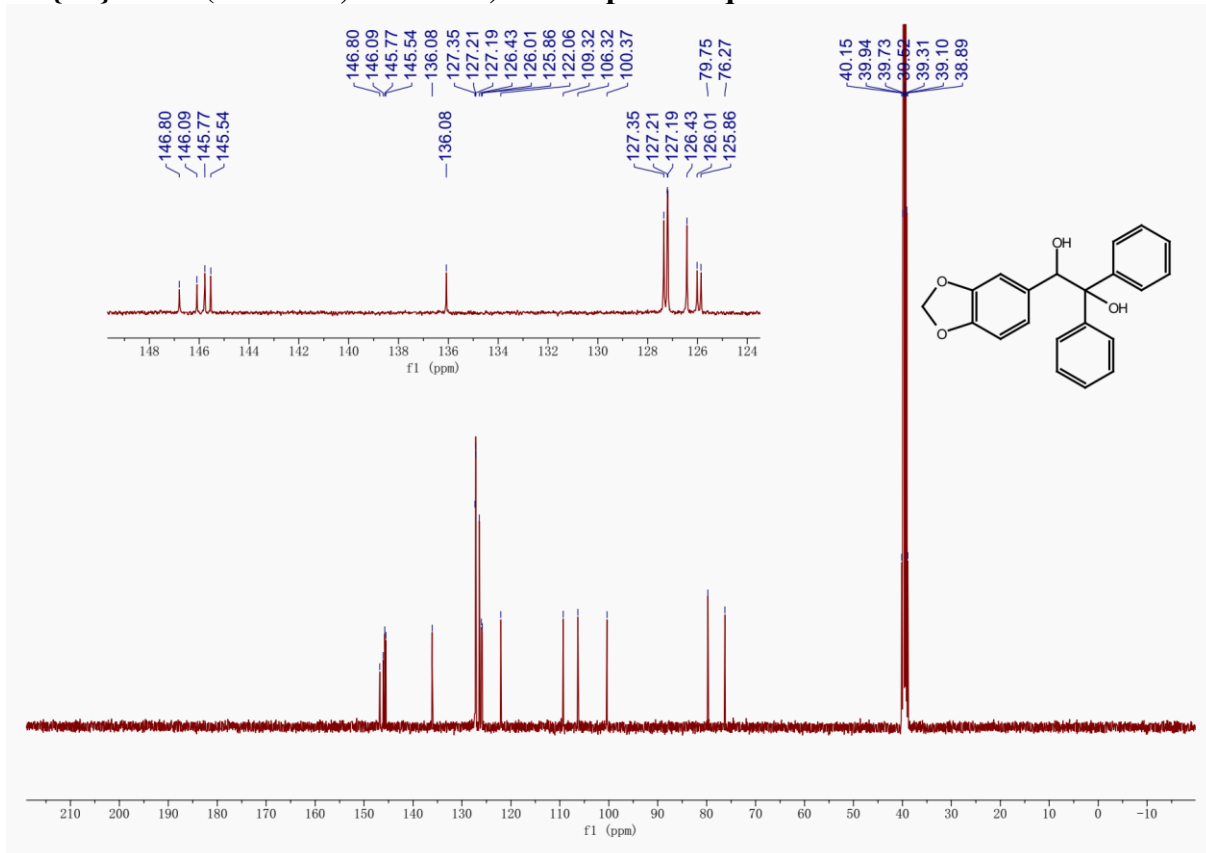

### $^1\text{H}$ NMR (400 MHz, $\text{CDCl}_3$ ) of Compound 3ra

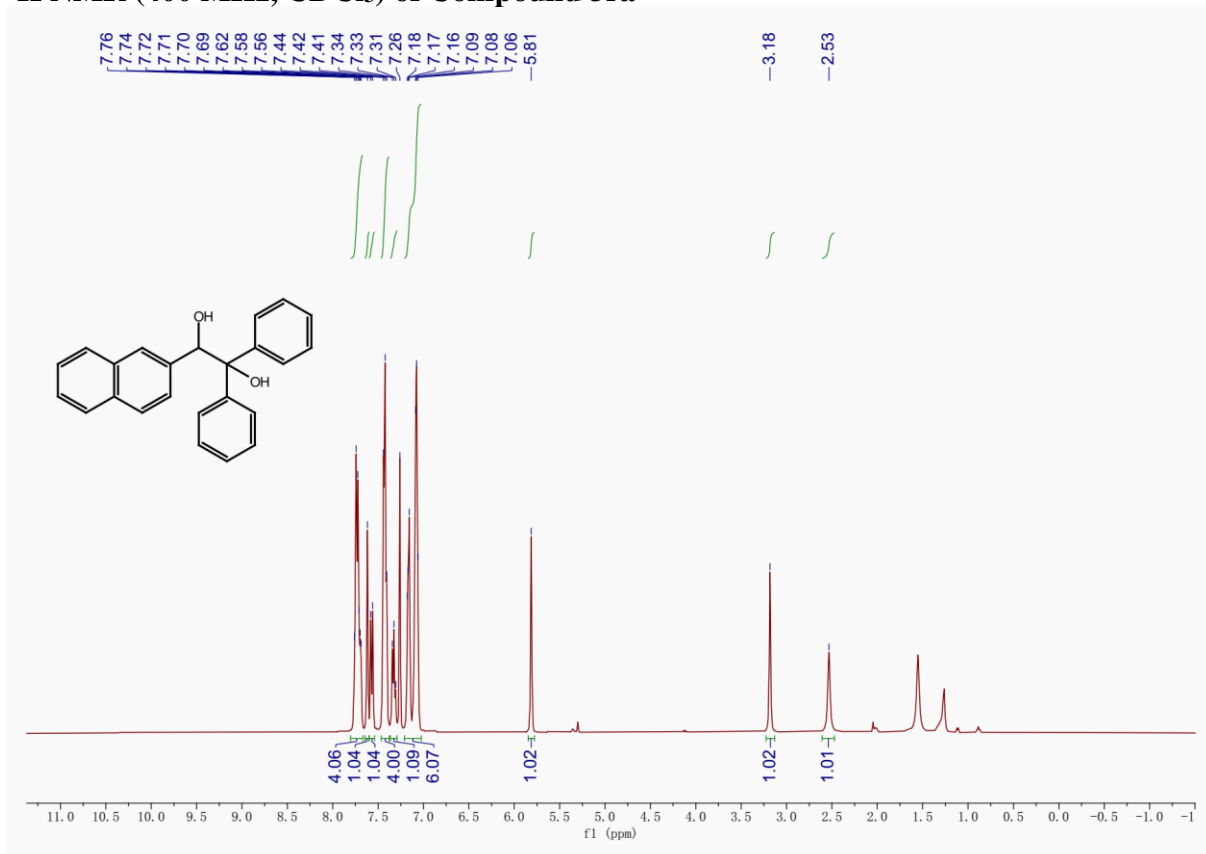

### $^{13}\text{C}\{^1\text{H}\}$ NMR (101 MHz, $\text{CDCl}_3$ ) of Compound 3ra

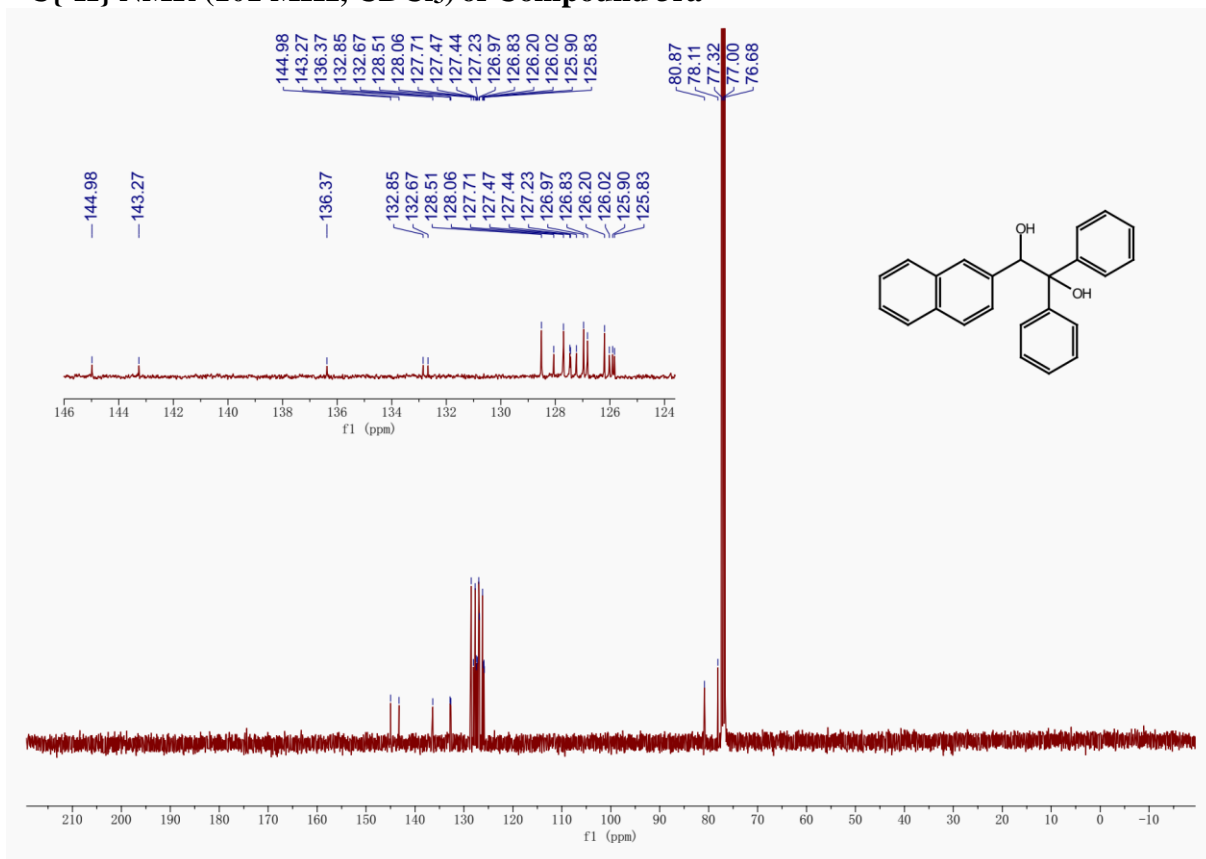



### $^1\text{H}$ NMR (400 MHz, $\text{CDCl}_3$ ) of Compound 3sa

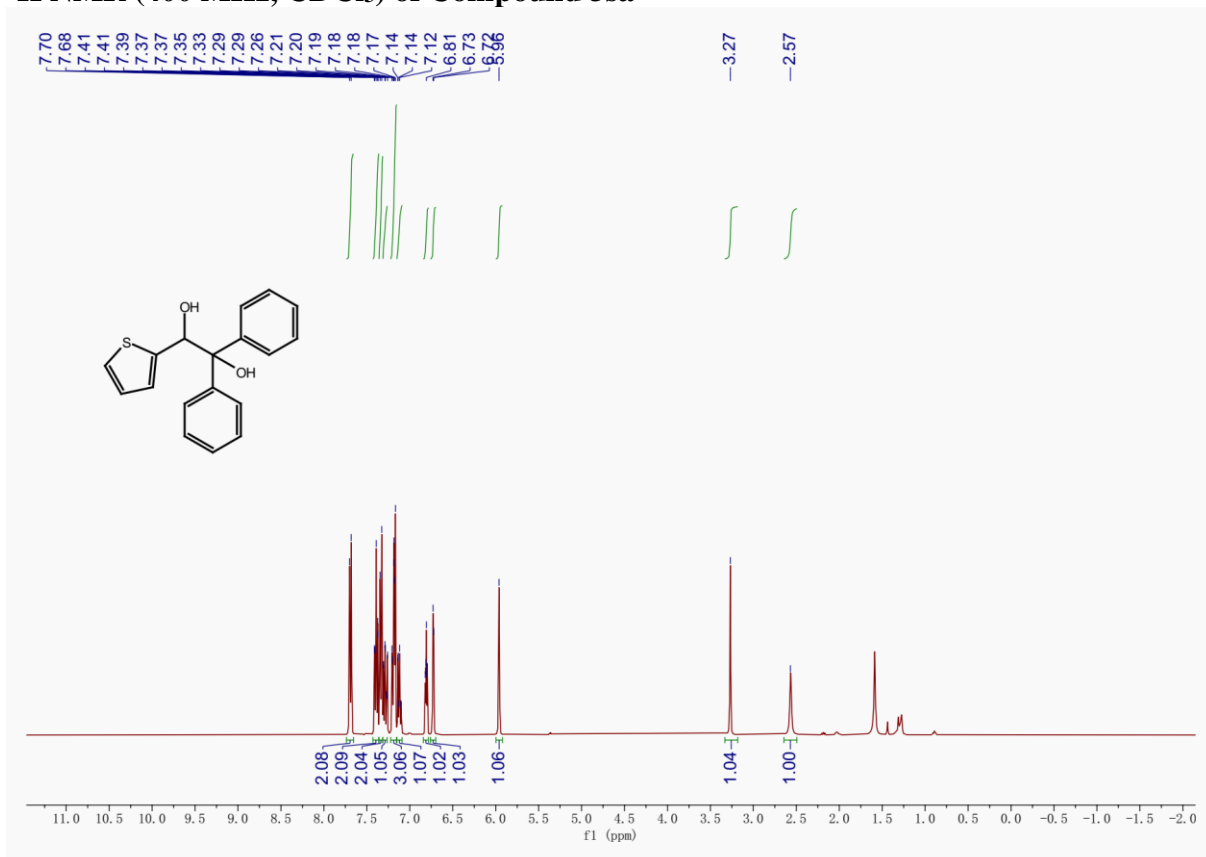

### $^{13}\text{C}\{^1\text{H}\}$ NMR (101 MHz, $\text{CDCl}_3$ ) of Compound 3sa

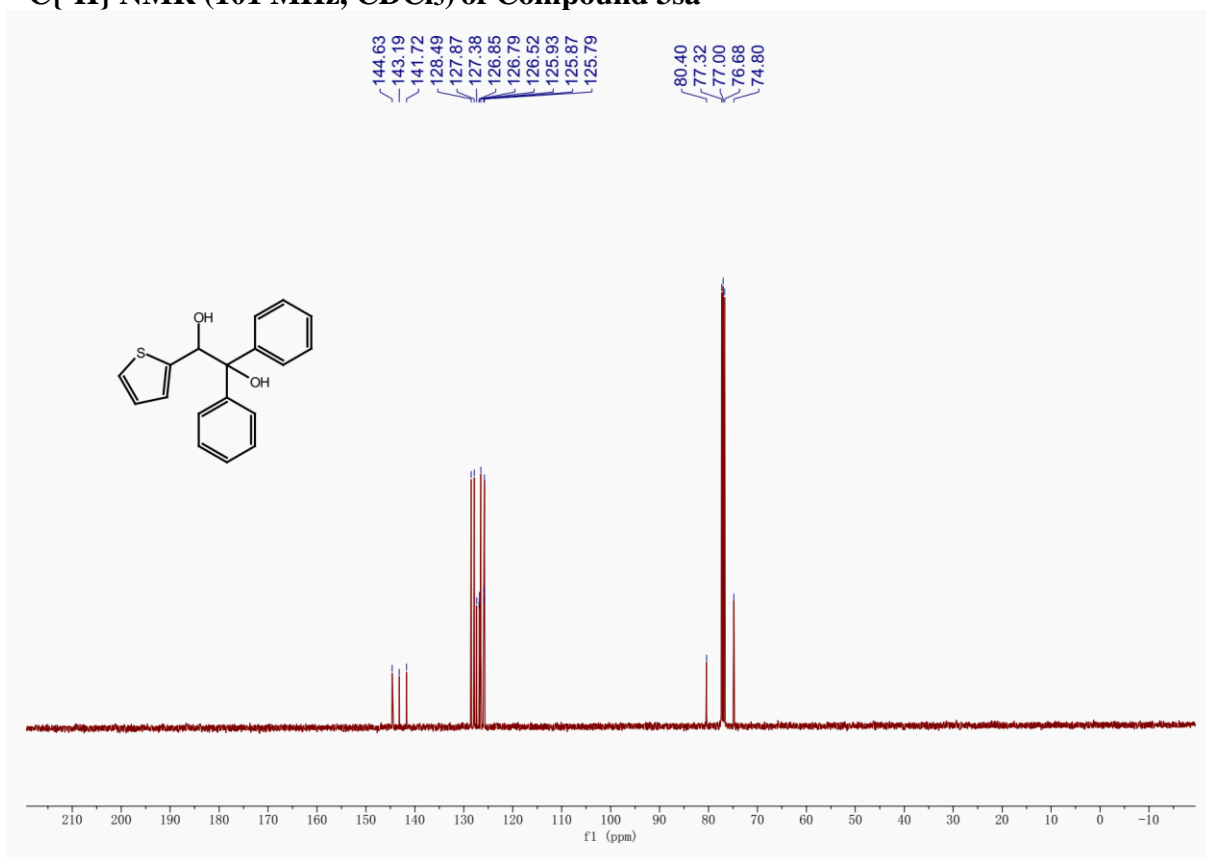

### $^1\text{H}$ NMR (400 MHz, $\text{CDCl}_3$ ) of Compound 3ab

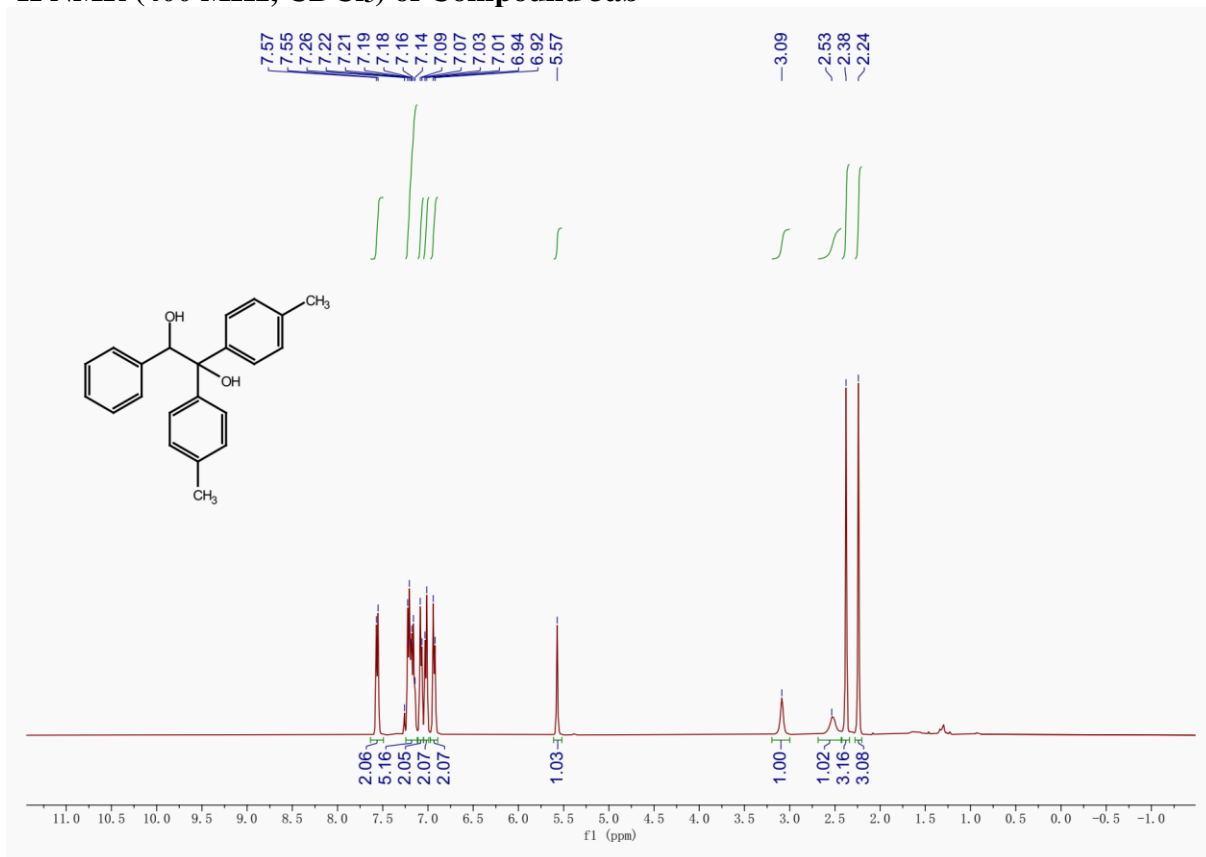

### $^{13}\text{C}\{^1\text{H}\}$ NMR (101 MHz, $\text{CDCl}_3$ ) of Compound 3ab

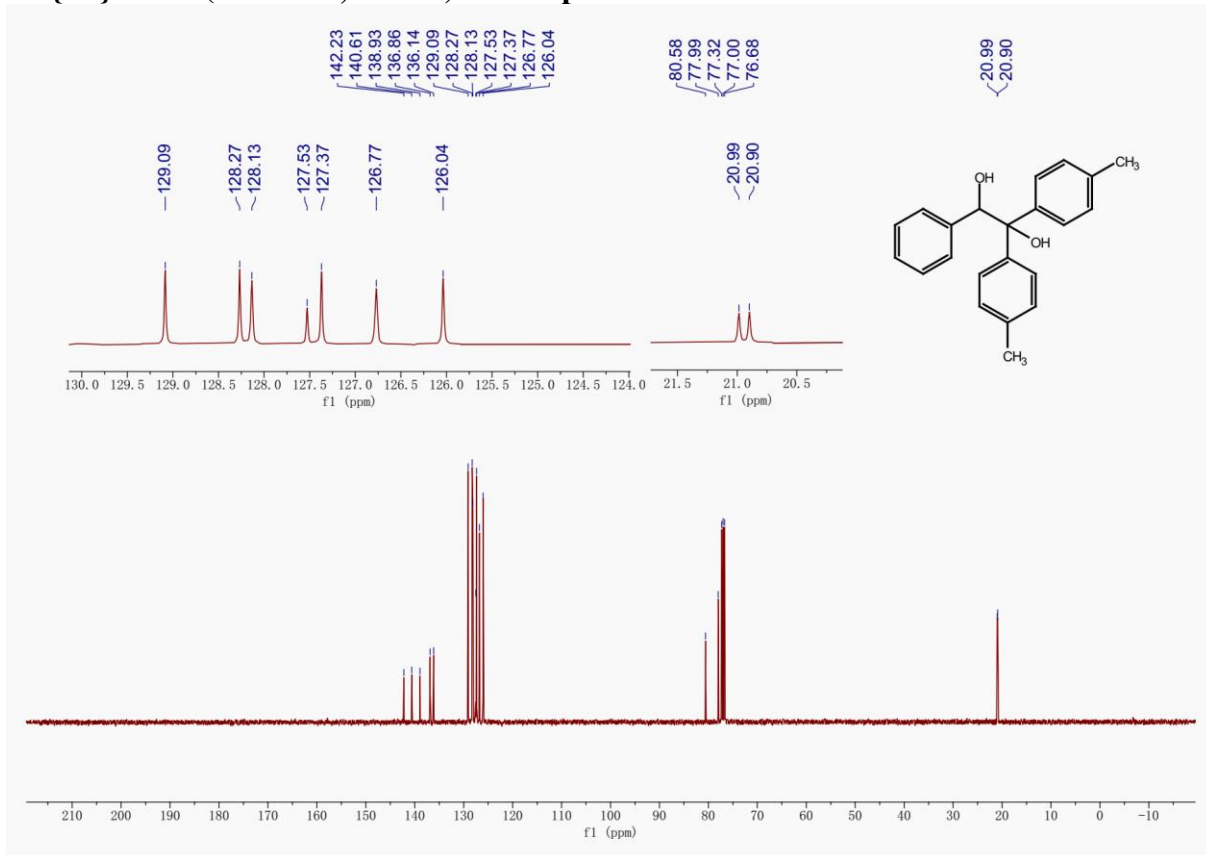

### $^1\text{H}$ NMR (400 MHz, $\text{CDCl}_3$ ) of Compound 3ac

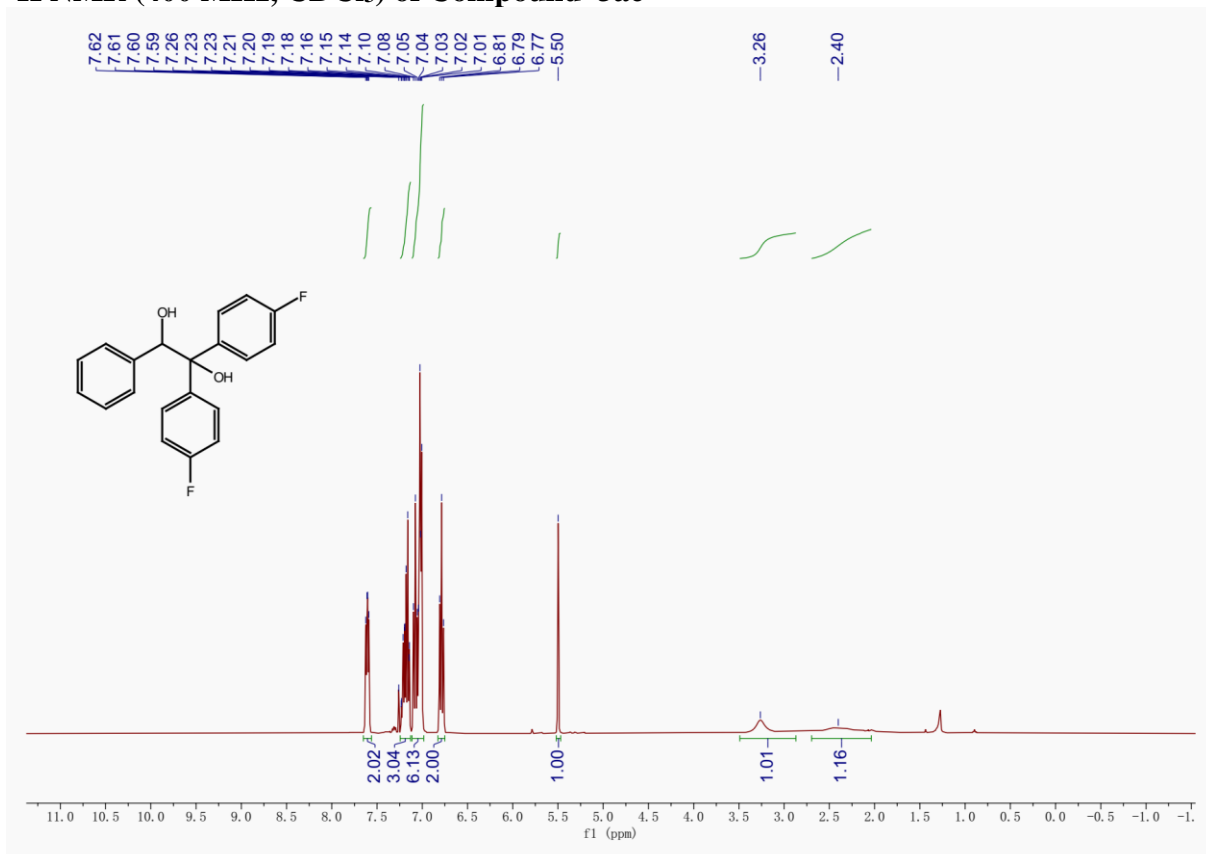

### $^{13}\text{C}\{^1\text{H}\}$ NMR (101 MHz, $\text{CDCl}_3$ ) of Compound 3ac

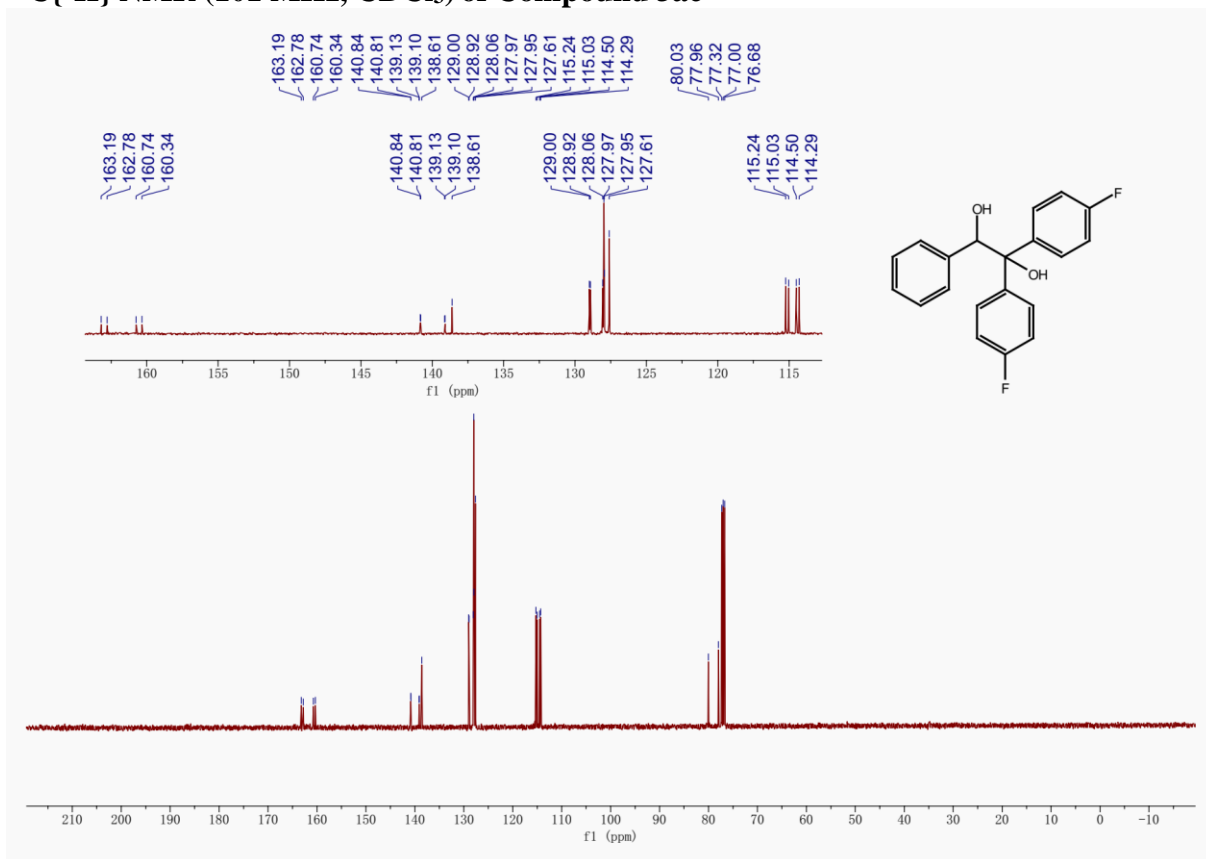

**<sup>19</sup>F NMR (376 MHz, CDCl<sub>3</sub>) of Compound 3ac**

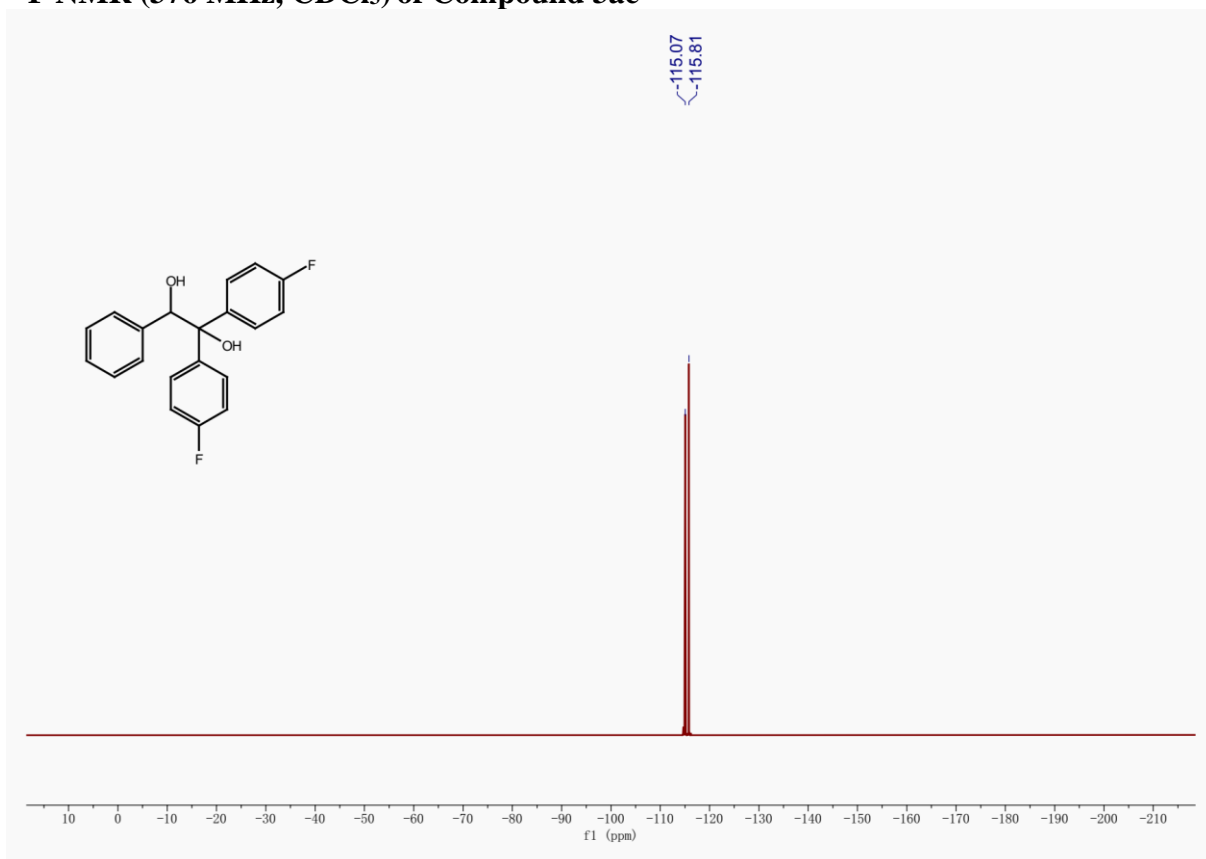

### $^1\text{H}$ NMR (400 MHz, $\text{CDCl}_3$ ) of Compound 3ad

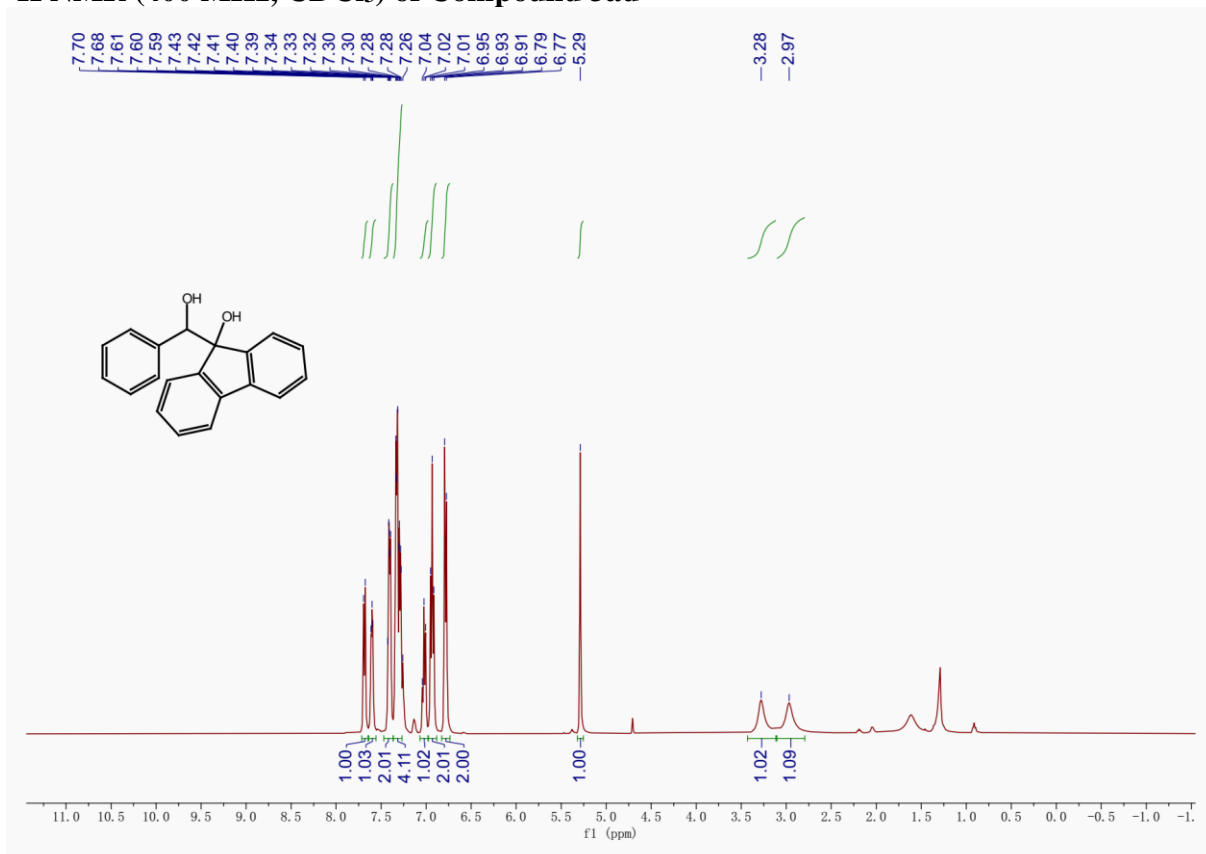

### $^{13}\text{C}\{^1\text{H}\}$ NMR (101 MHz, $\text{CDCl}_3$ ) of Compound 3ad

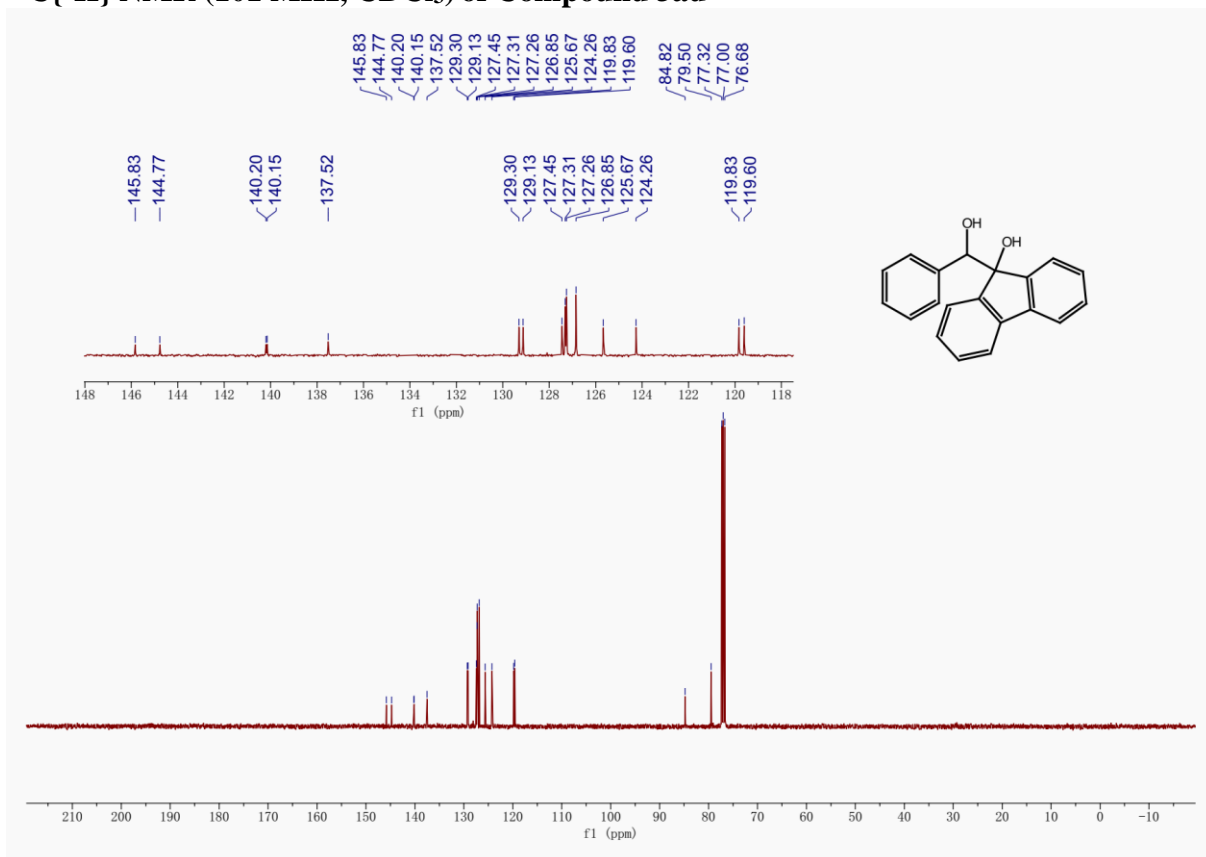

### $^1\text{H}$ NMR (400 MHz, $\text{DMSO-}d_6$ ) of Compound 3ae

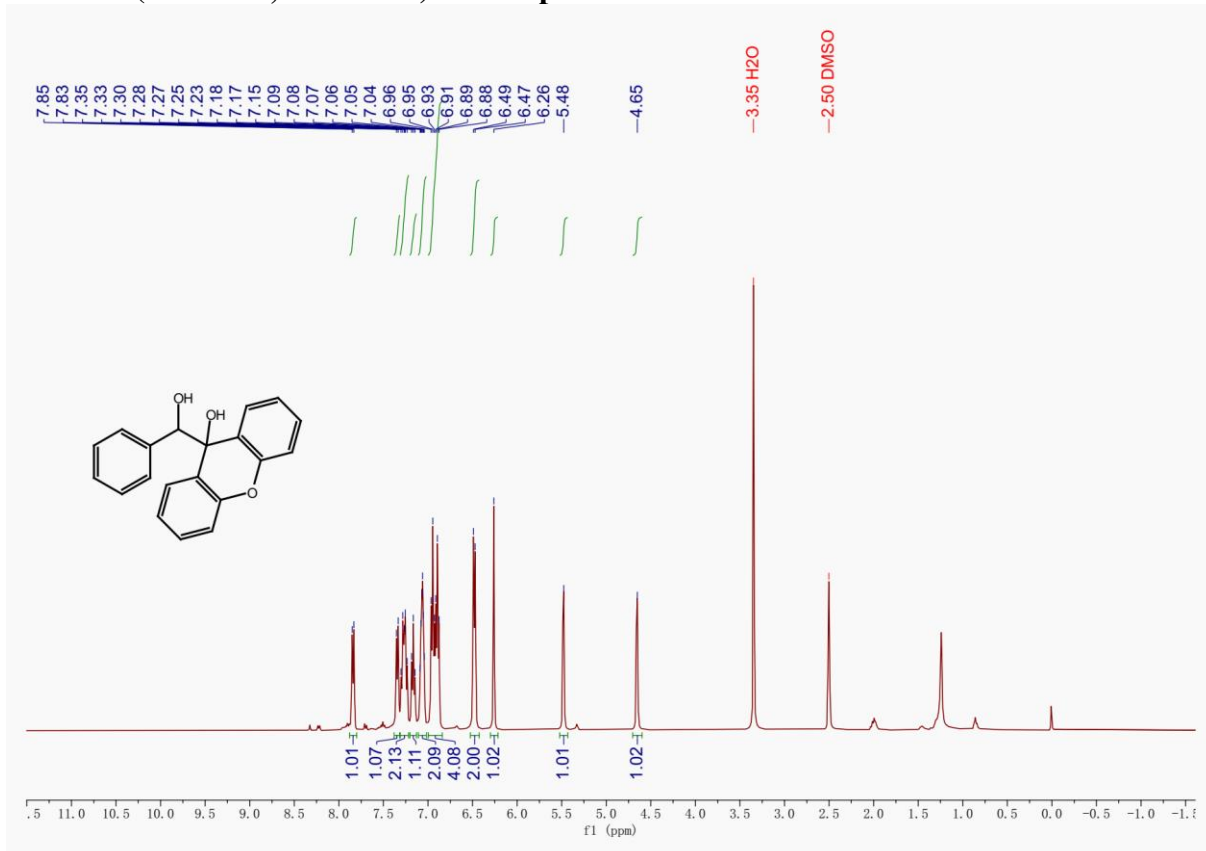

### $^{13}\text{C}\{^1\text{H}\}$ NMR (101 MHz, $\text{DMSO-}d_6$ ) of Compound 3ae

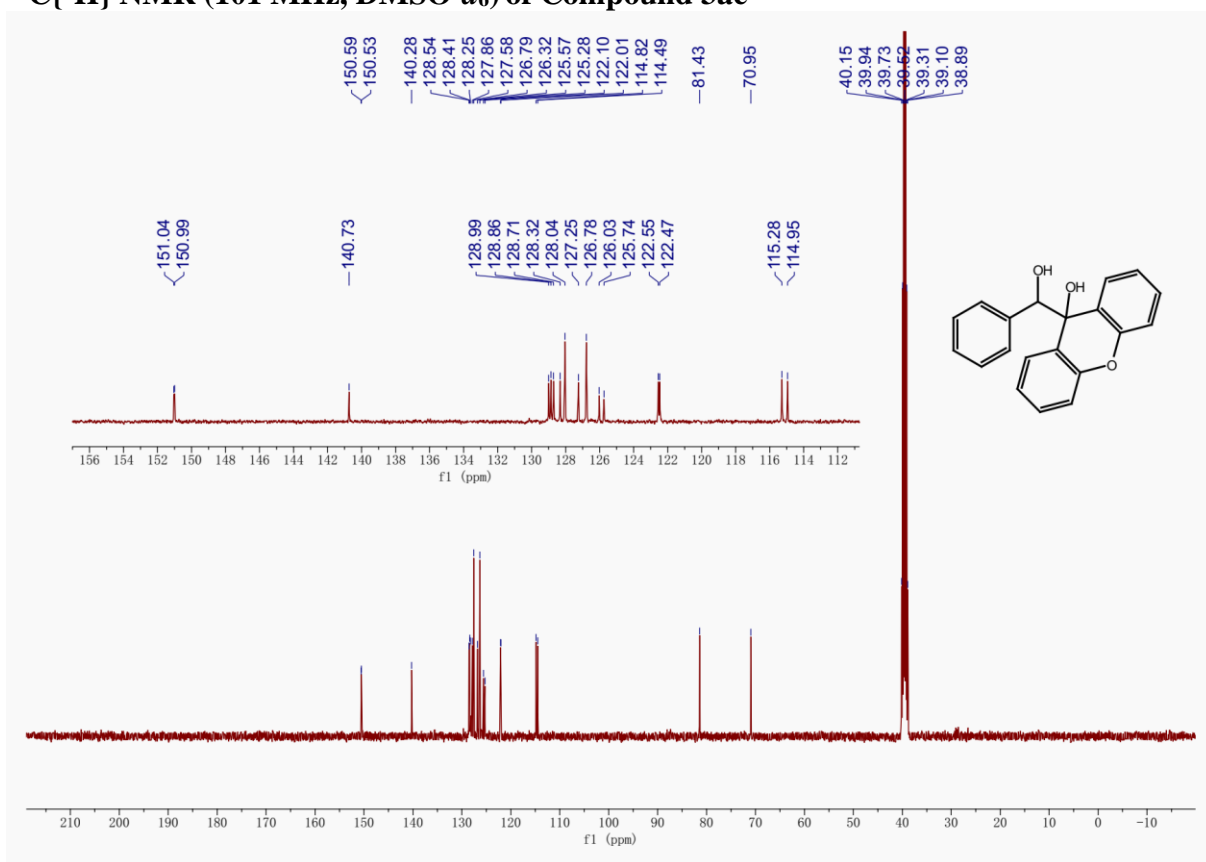

### $^1\text{H}$ NMR (400 MHz, $\text{CDCl}_3$ ) of Compound 3af

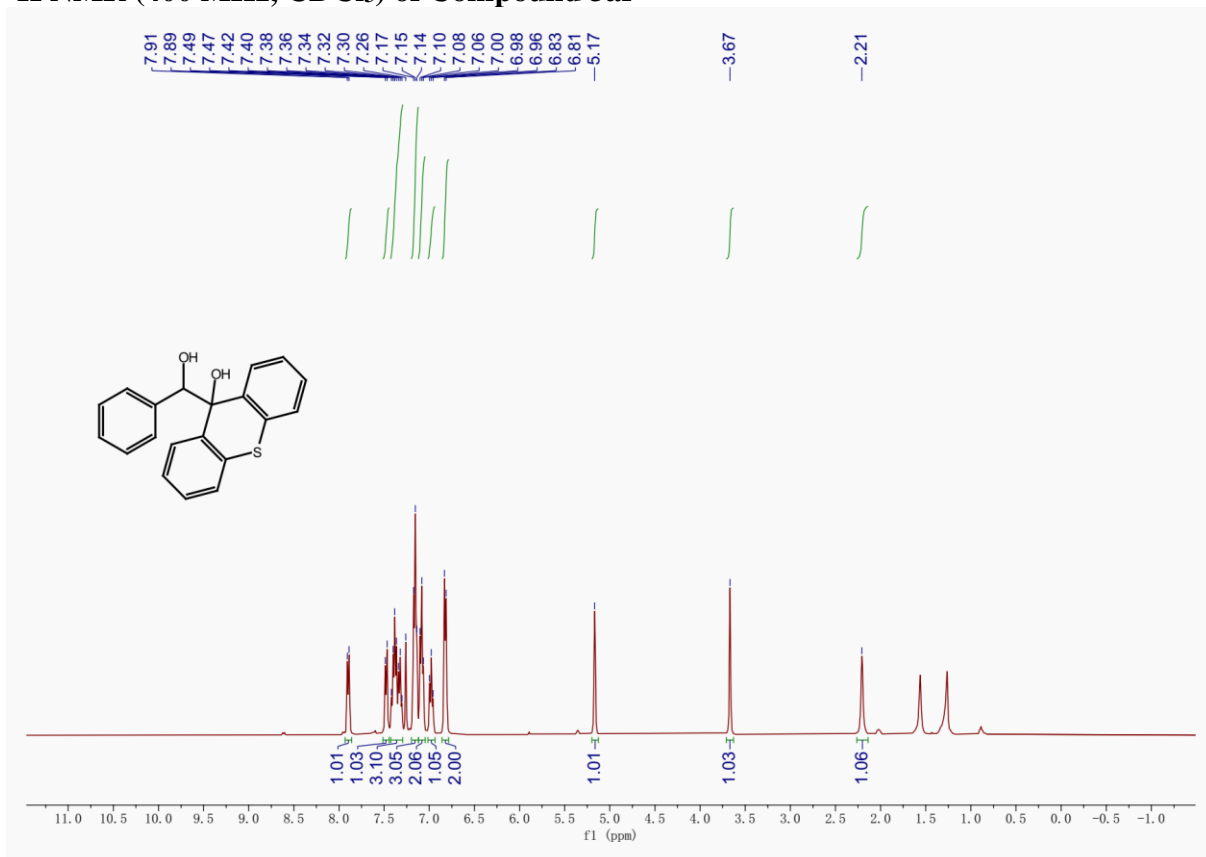

### $^{13}\text{C}\{^1\text{H}\}$ NMR (101 MHz, $\text{CDCl}_3$ ) of Compound 3af

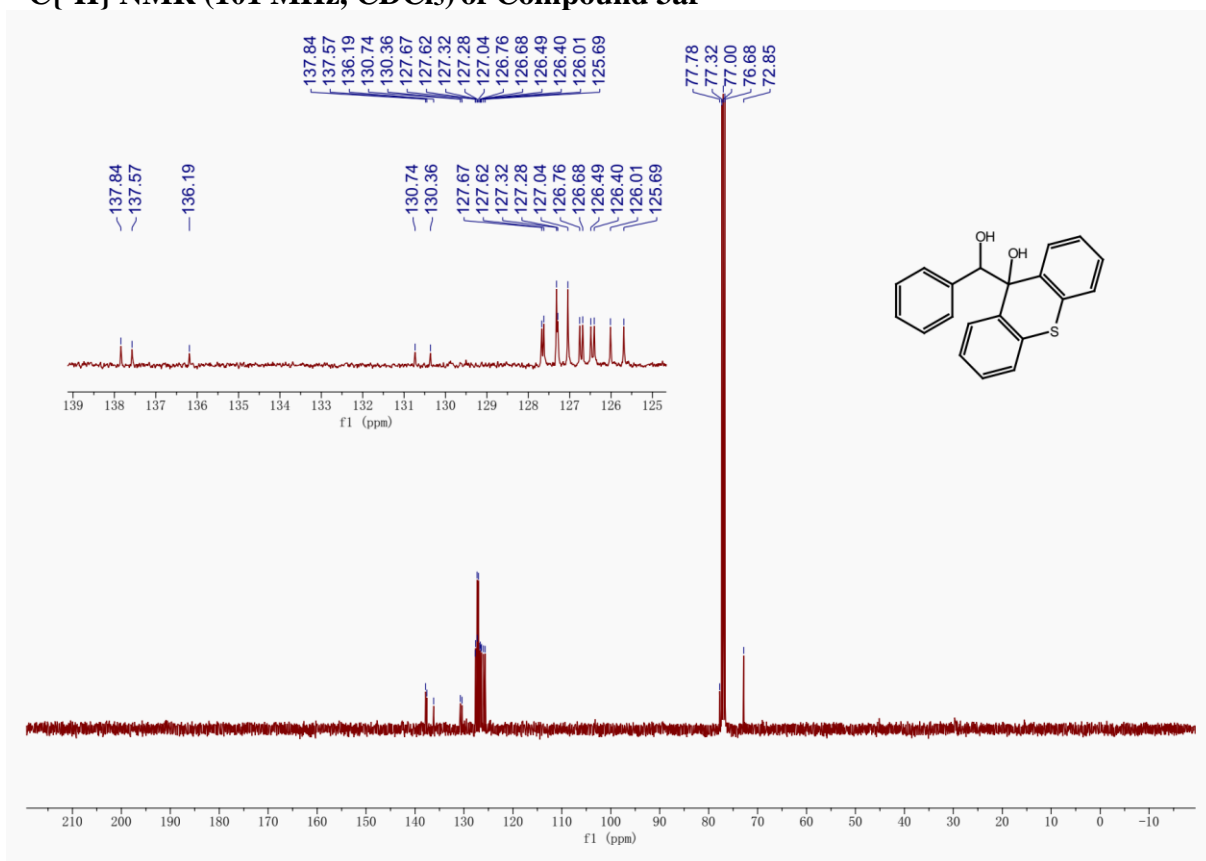

**<sup>1</sup>H NMR (400 MHz, CDCl<sub>3</sub>) of Compound 3ag**

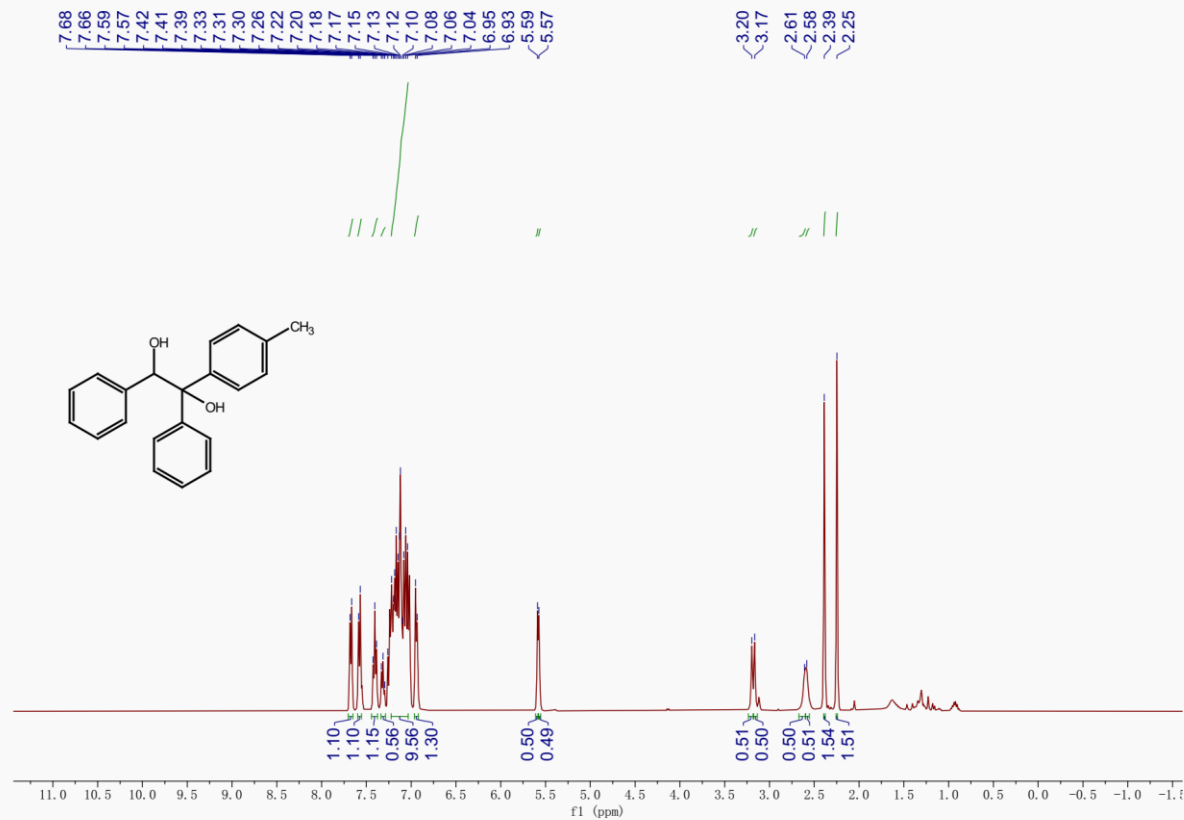

**<sup>13</sup>C{<sup>1</sup>H} NMR (101 MHz, CDCl<sub>3</sub>) of Compound 3ag**

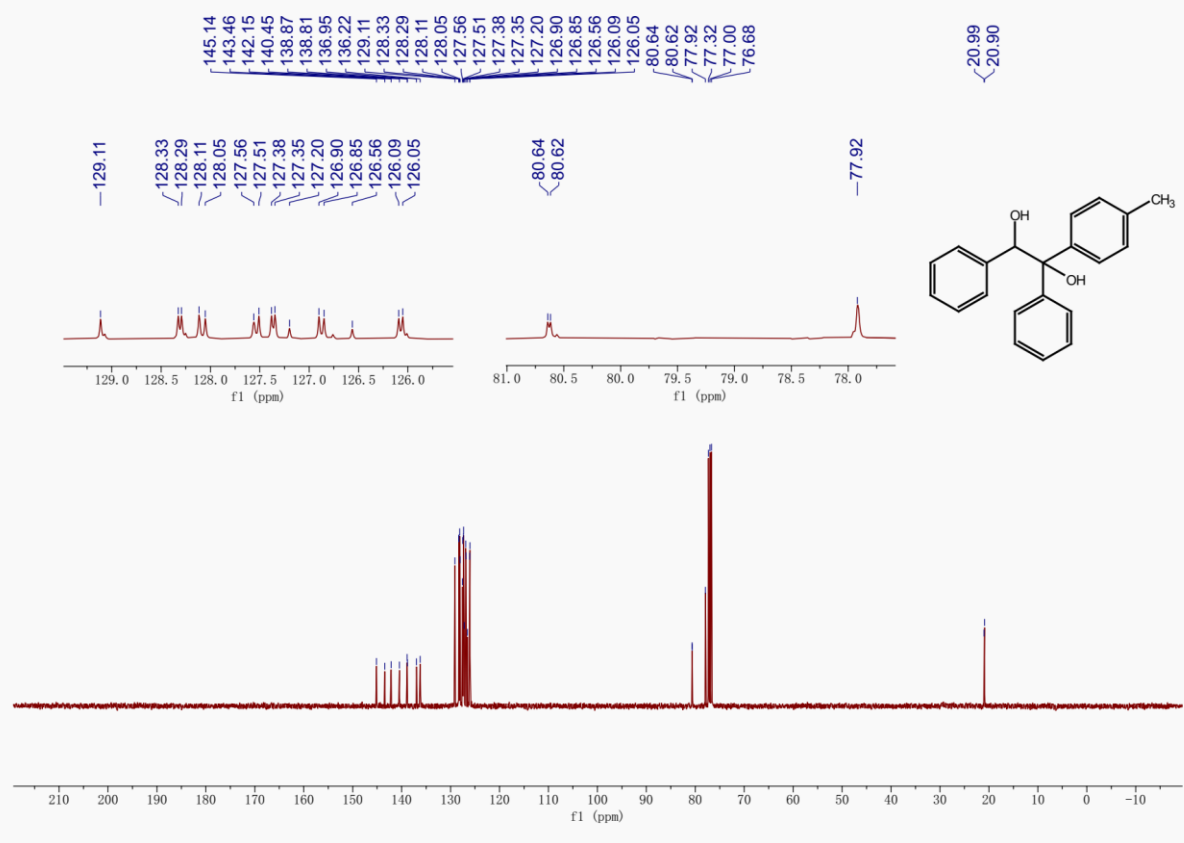



### $^1\text{H}$ NMR (400 MHz, $\text{CDCl}_3$ ) of Compound 3ah

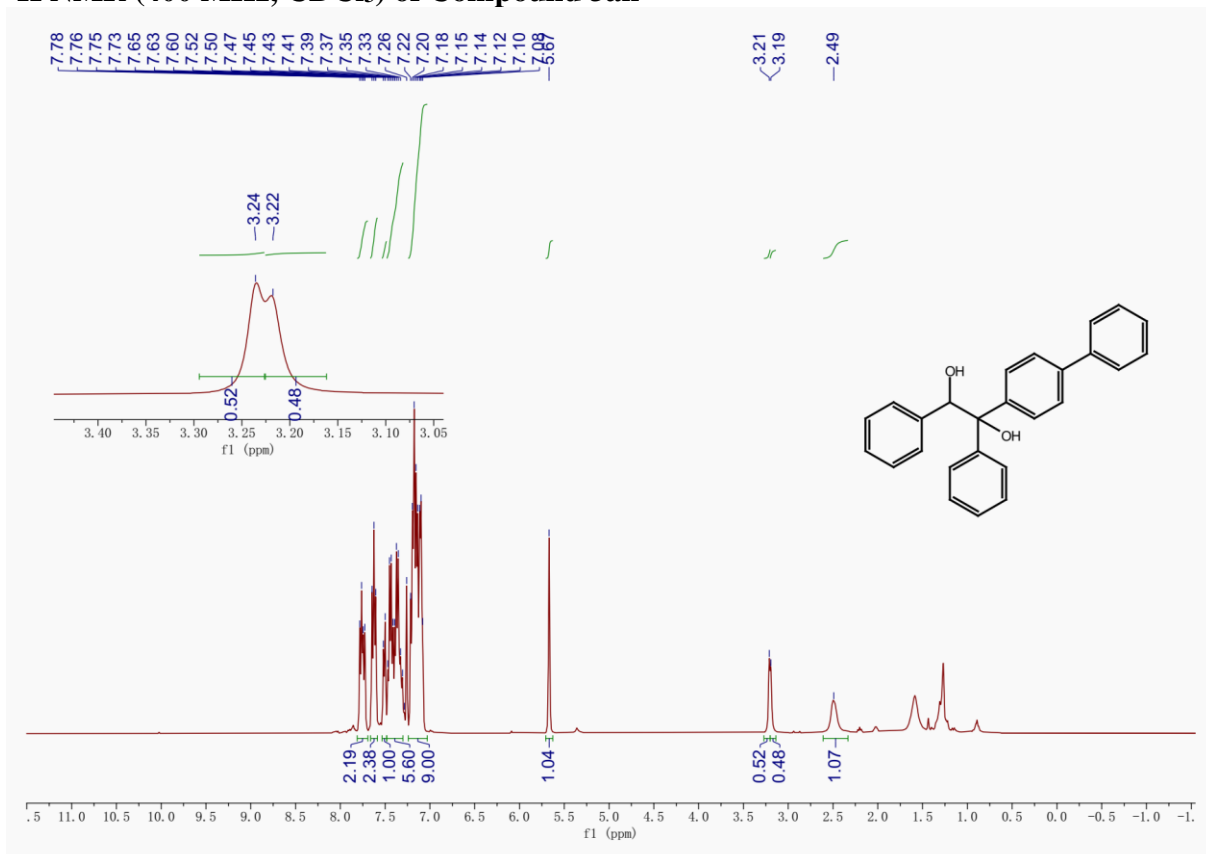

### $^{13}\text{C}\{^1\text{H}\}$ NMR (101 MHz, $\text{CDCl}_3$ ) of Compound 3ah

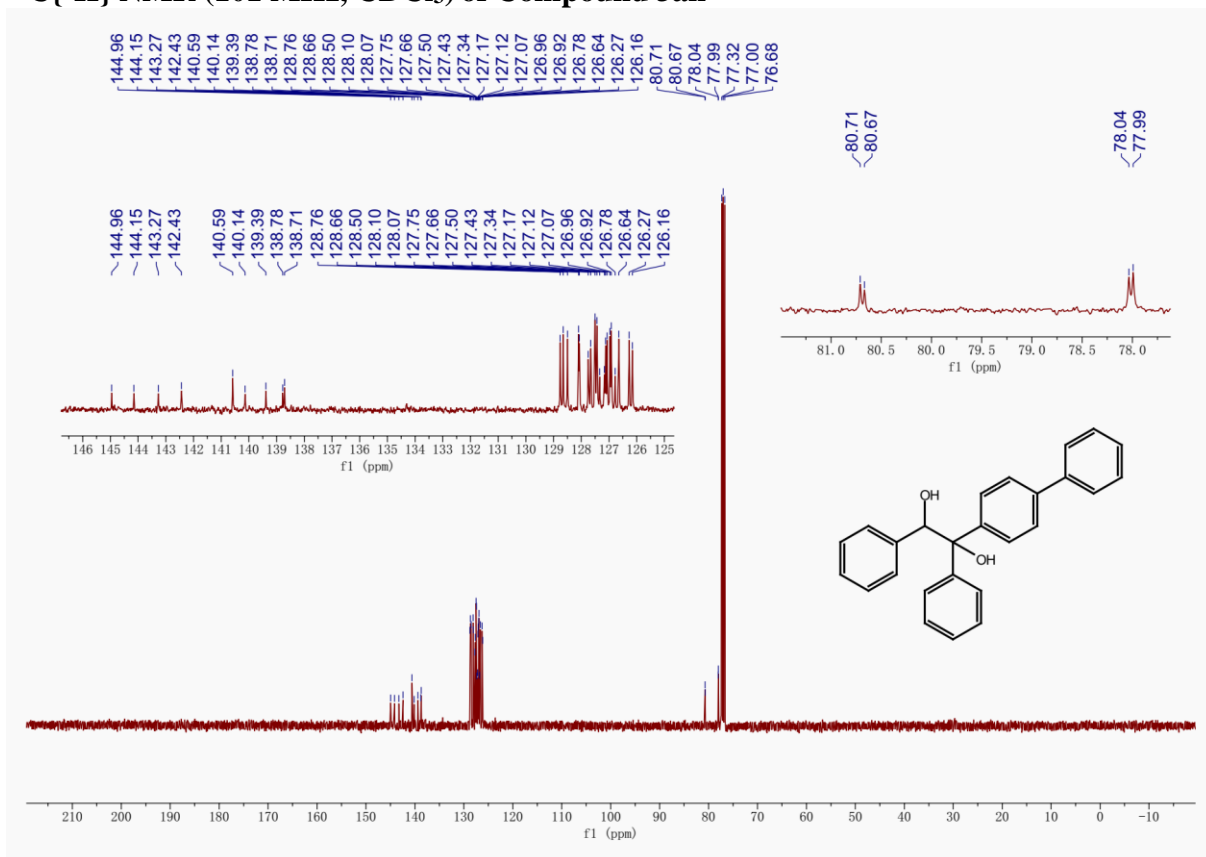

### <sup>1</sup>H NMR (400 MHz, CDCl<sub>3</sub>) of Compound 3ai

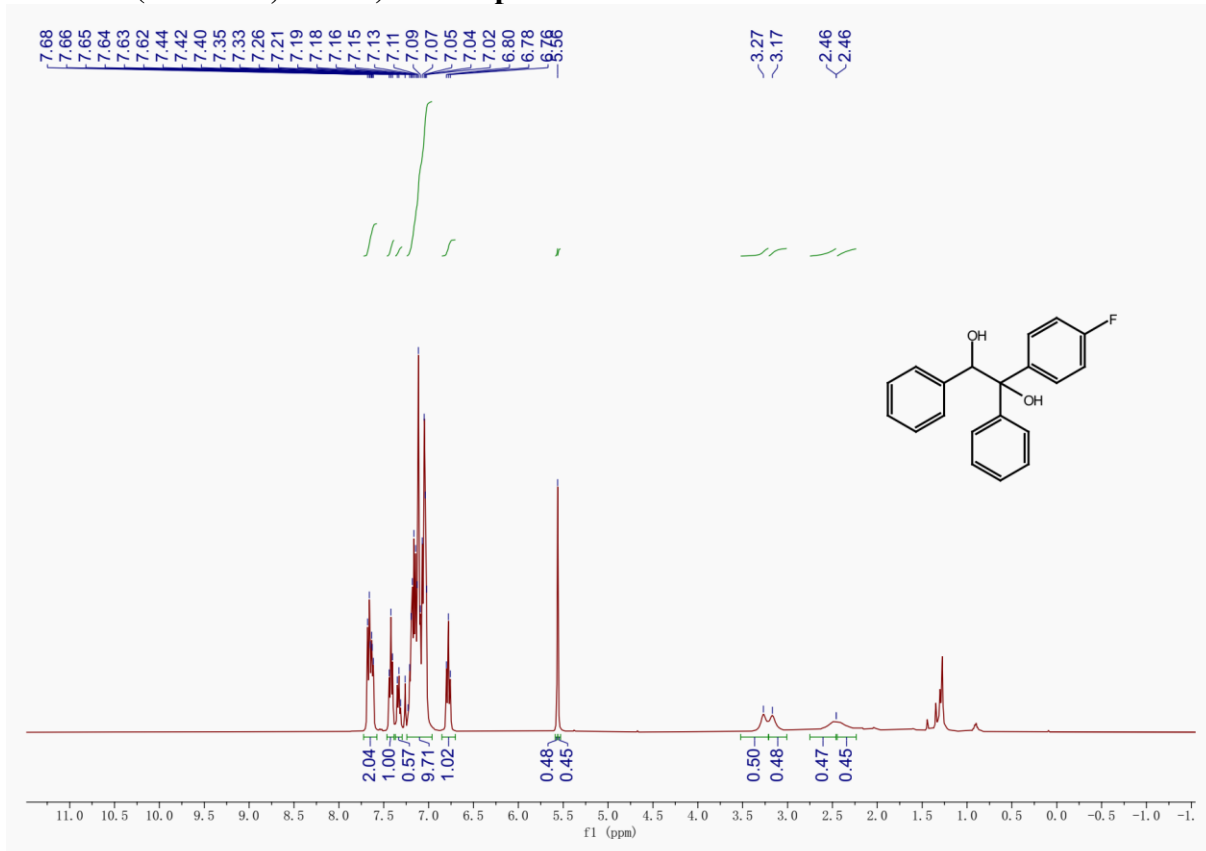

### <sup>13</sup>C{<sup>1</sup>H} NMR (101 MHz, CDCl<sub>3</sub>) of Compound 3ai

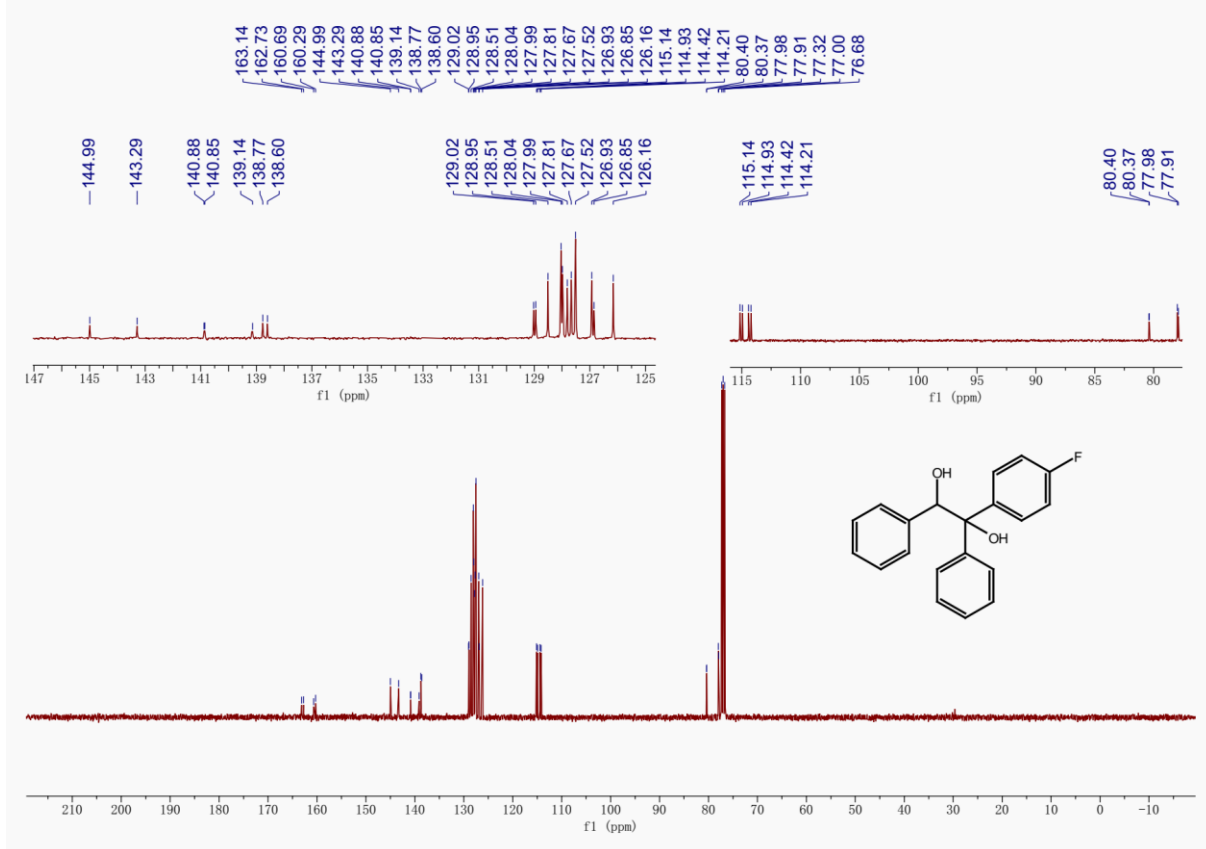

**<sup>19</sup>F NMR (376 MHz, CDCl<sub>3</sub>) of Compound 3ai**

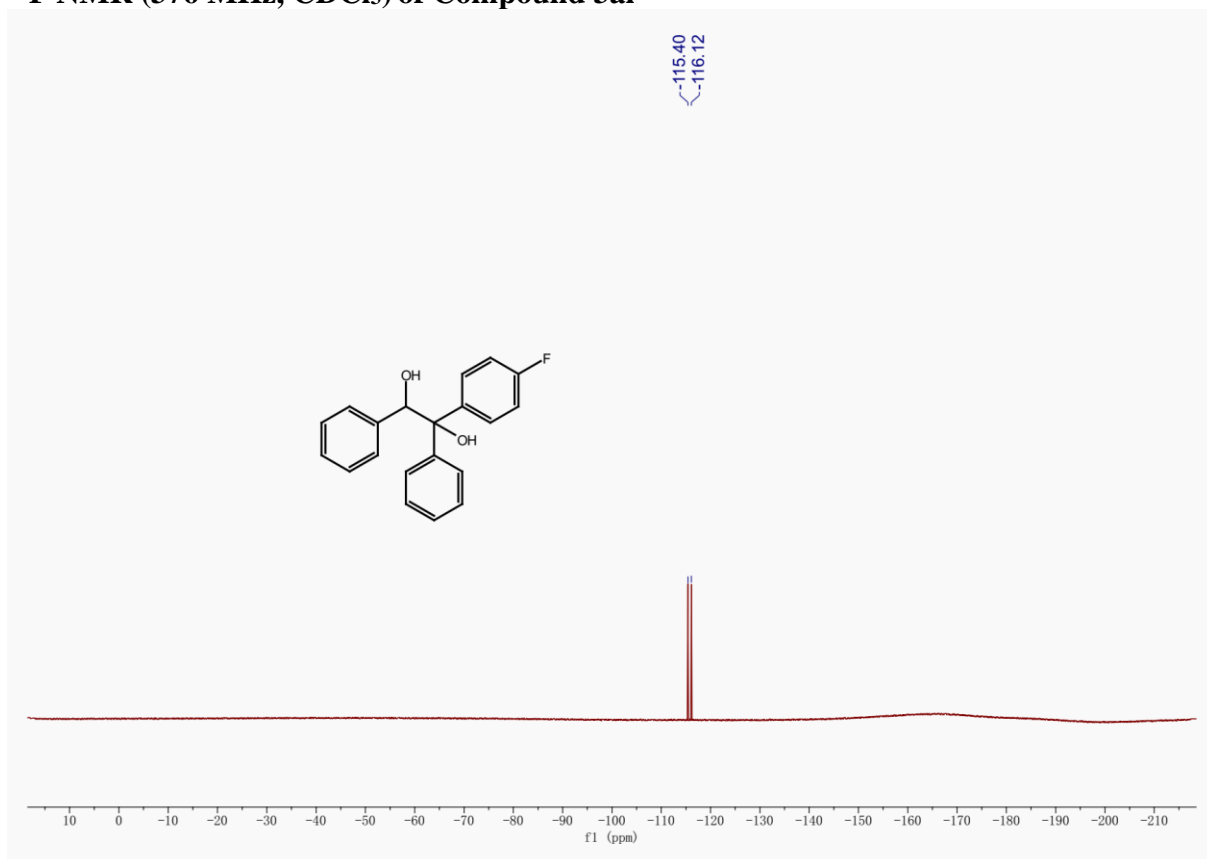

### $^1\text{H}$ NMR (400 MHz, $\text{CDCl}_3$ ) of Compound 3aj

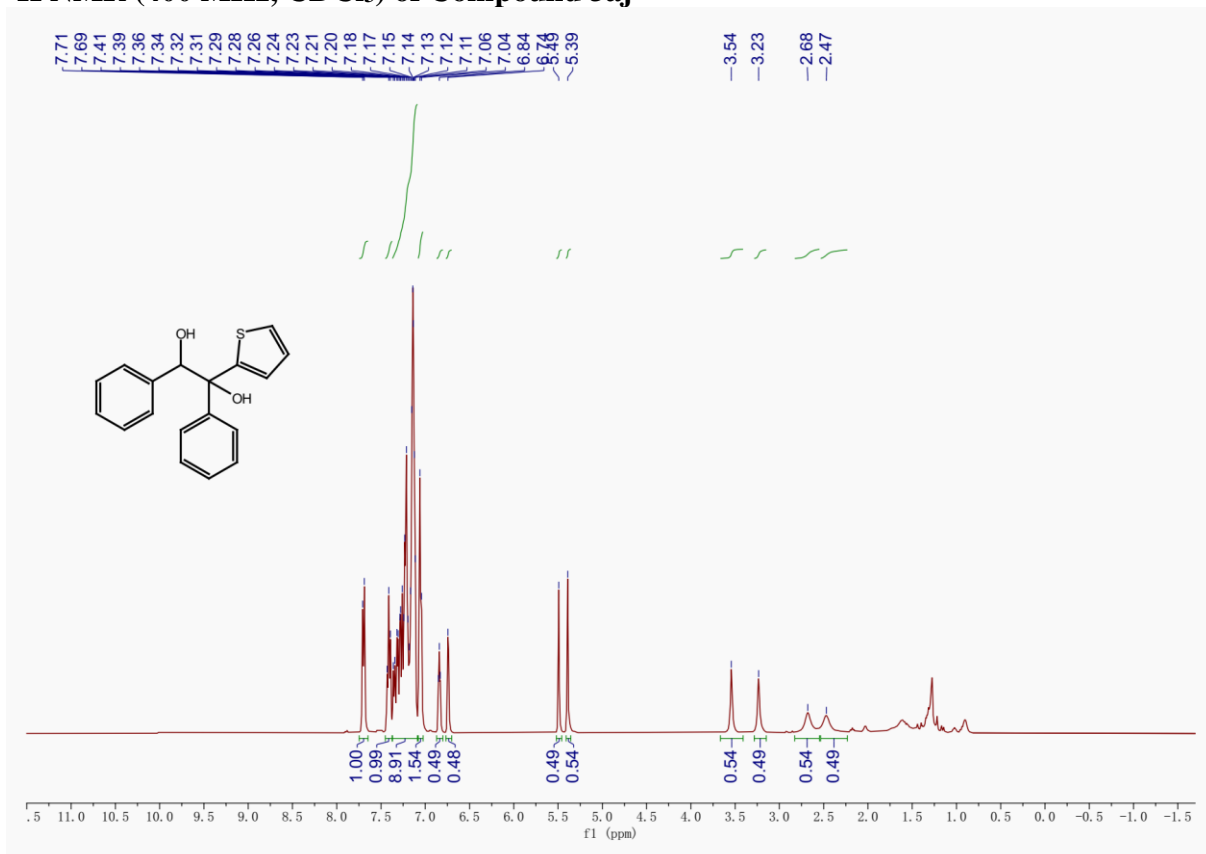

### $^{13}\text{C}\{^1\text{H}\}$ NMR (101 MHz, $\text{CDCl}_3$ ) of Compound 3aj

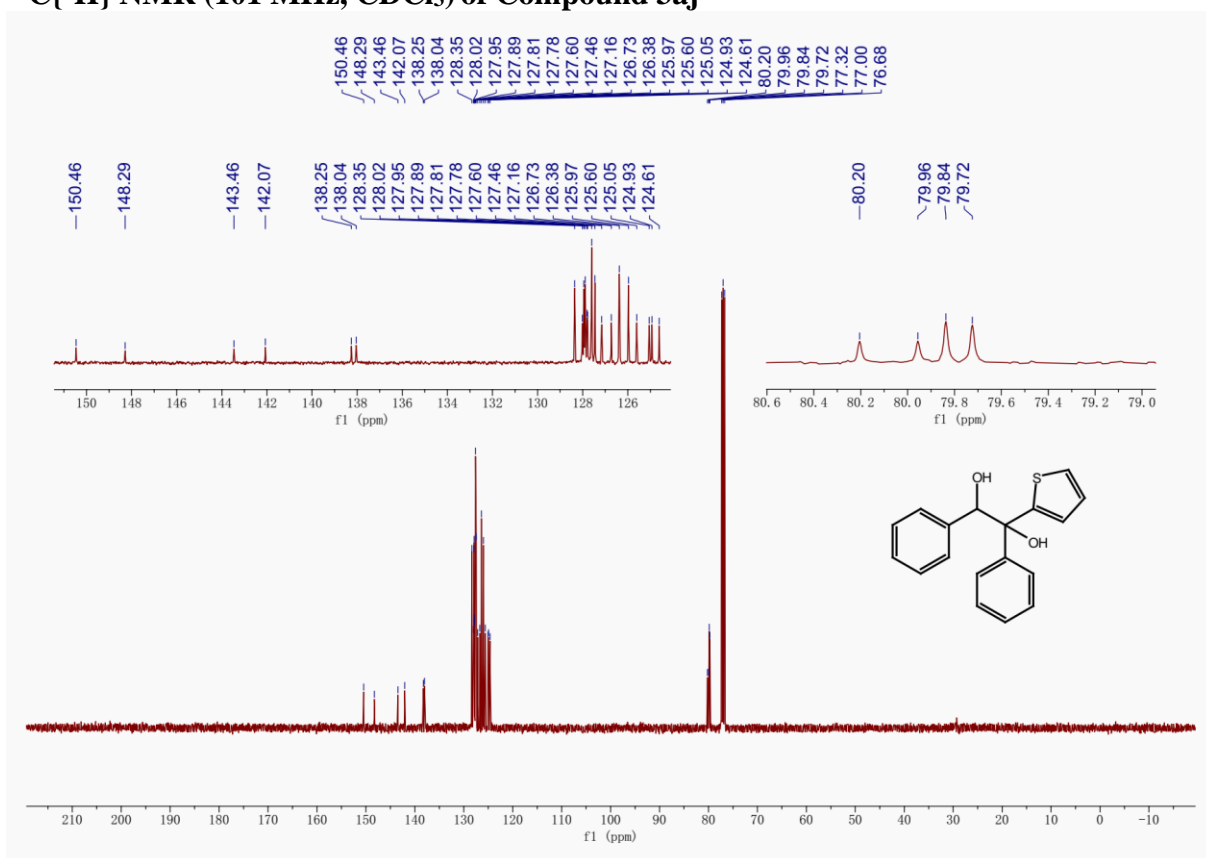

### $^1\text{H}$ NMR (400 MHz, $\text{CDCl}_3$ ) of Compound 3ak

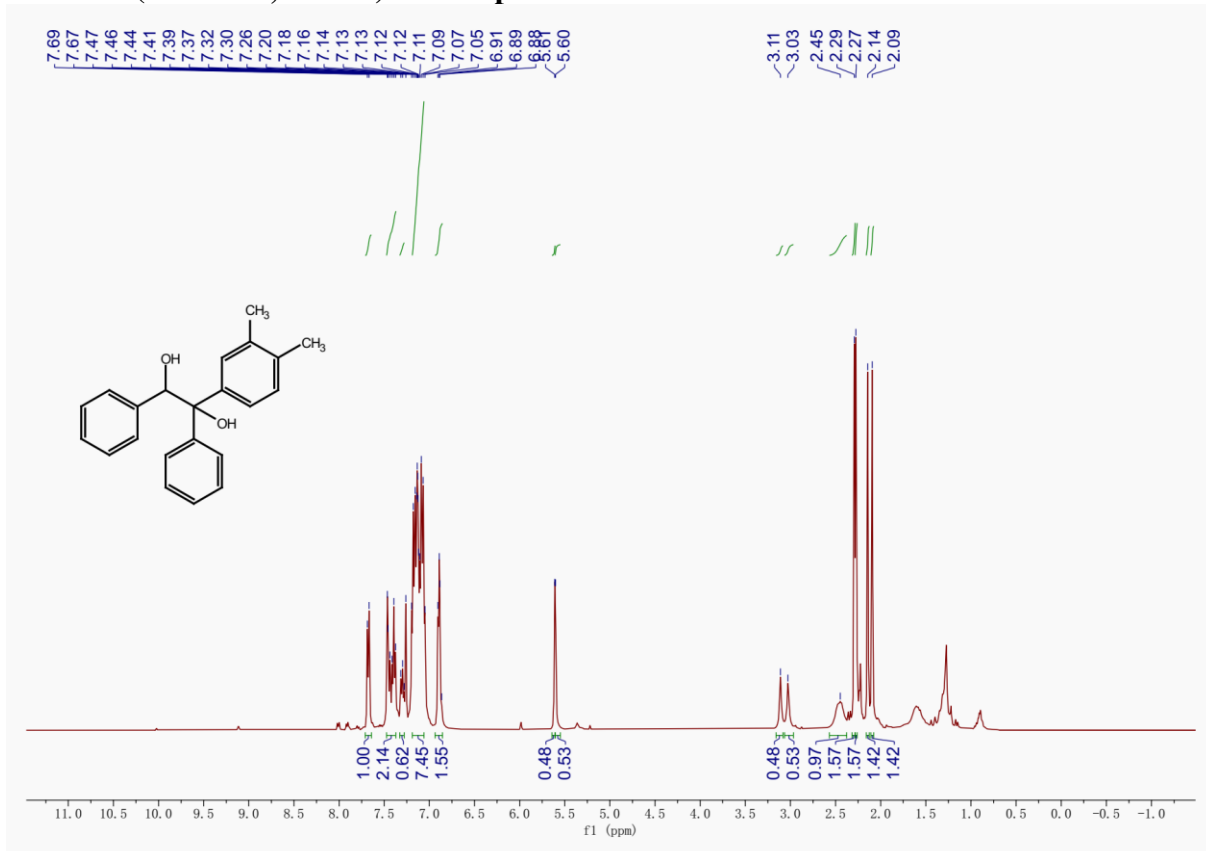

### $^{13}\text{C}\{^1\text{H}\}$ NMR (101 MHz, $\text{CDCl}_3$ ) of Compound 3ak

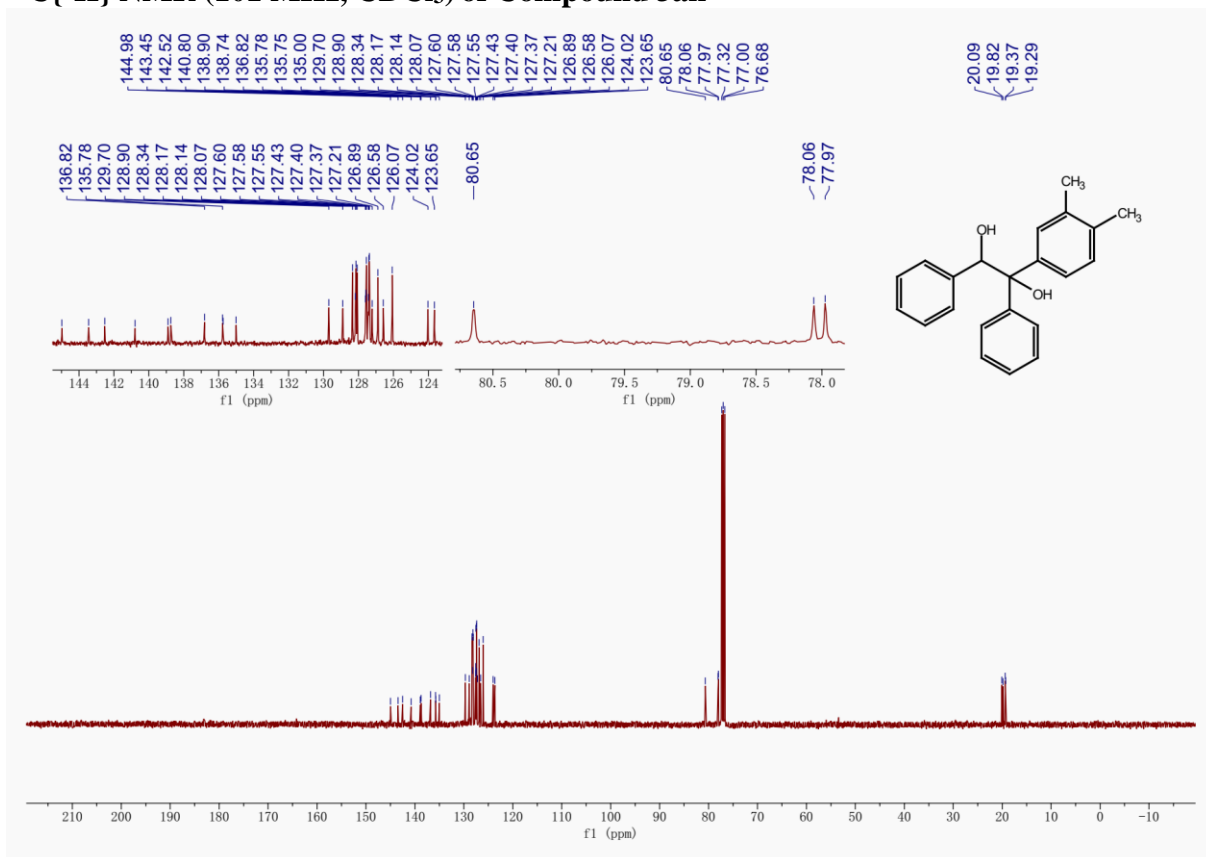

### $^1\text{H}$ NMR (400 MHz, $\text{CDCl}_3$ ) of Compound 5aa

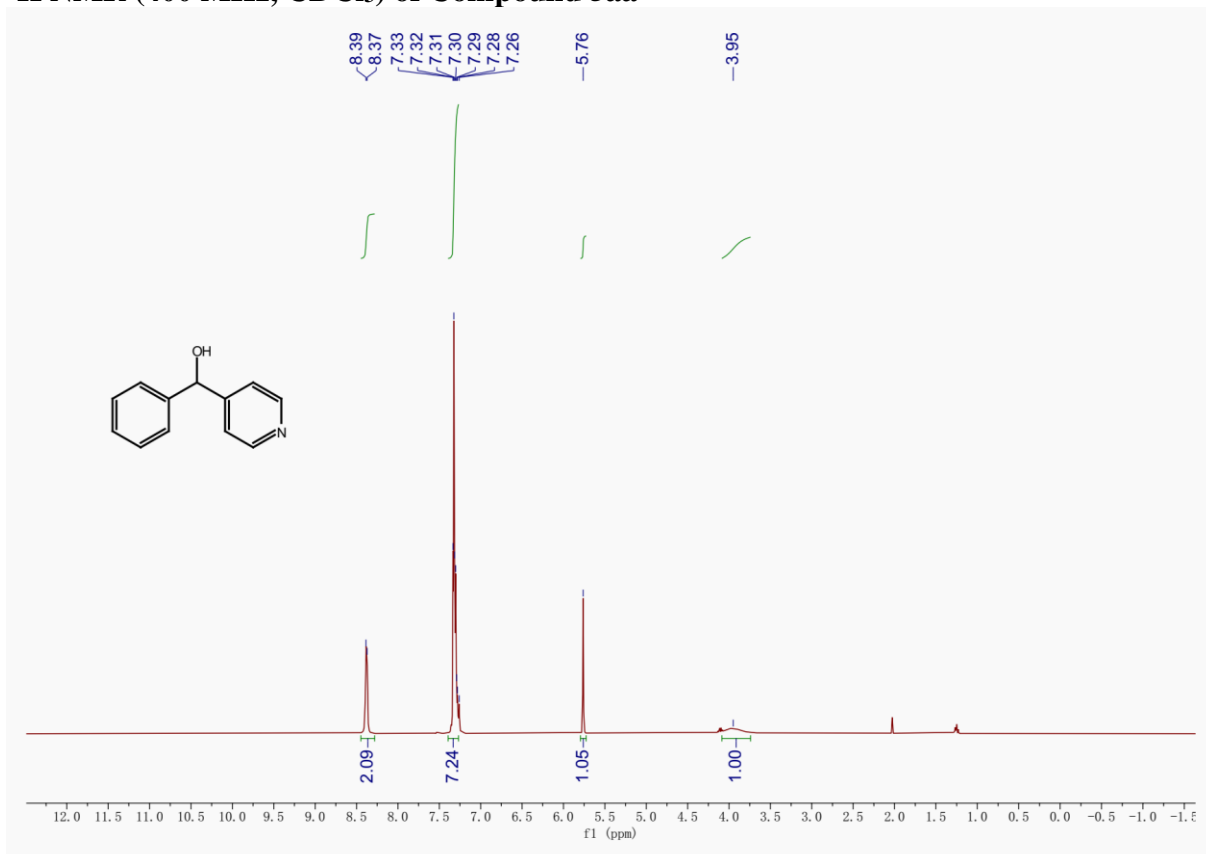

### $^{13}\text{C}\{^1\text{H}\}$ NMR (101 MHz, $\text{CDCl}_3$ ) of Compound 5aa

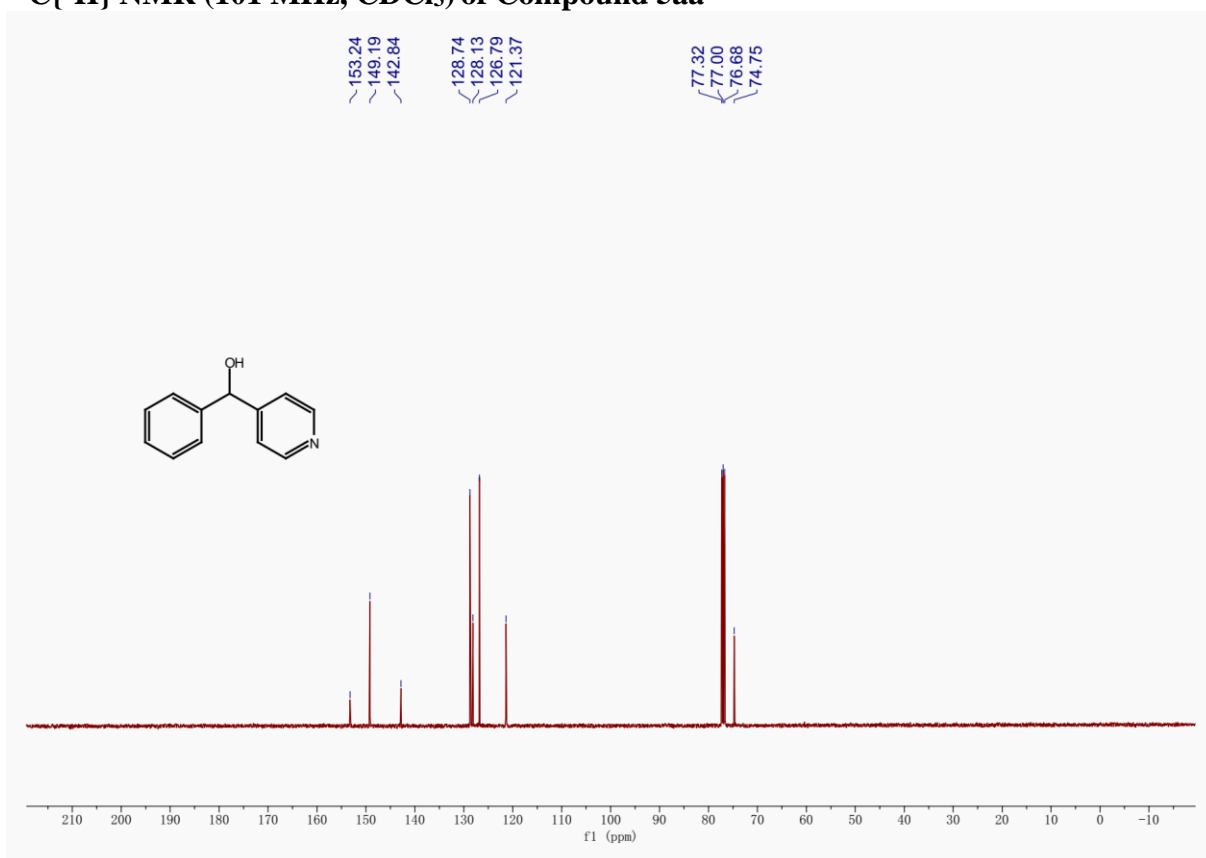

### $^1\text{H}$ NMR (400 MHz, $\text{CDCl}_3$ ) of Compound 5ba

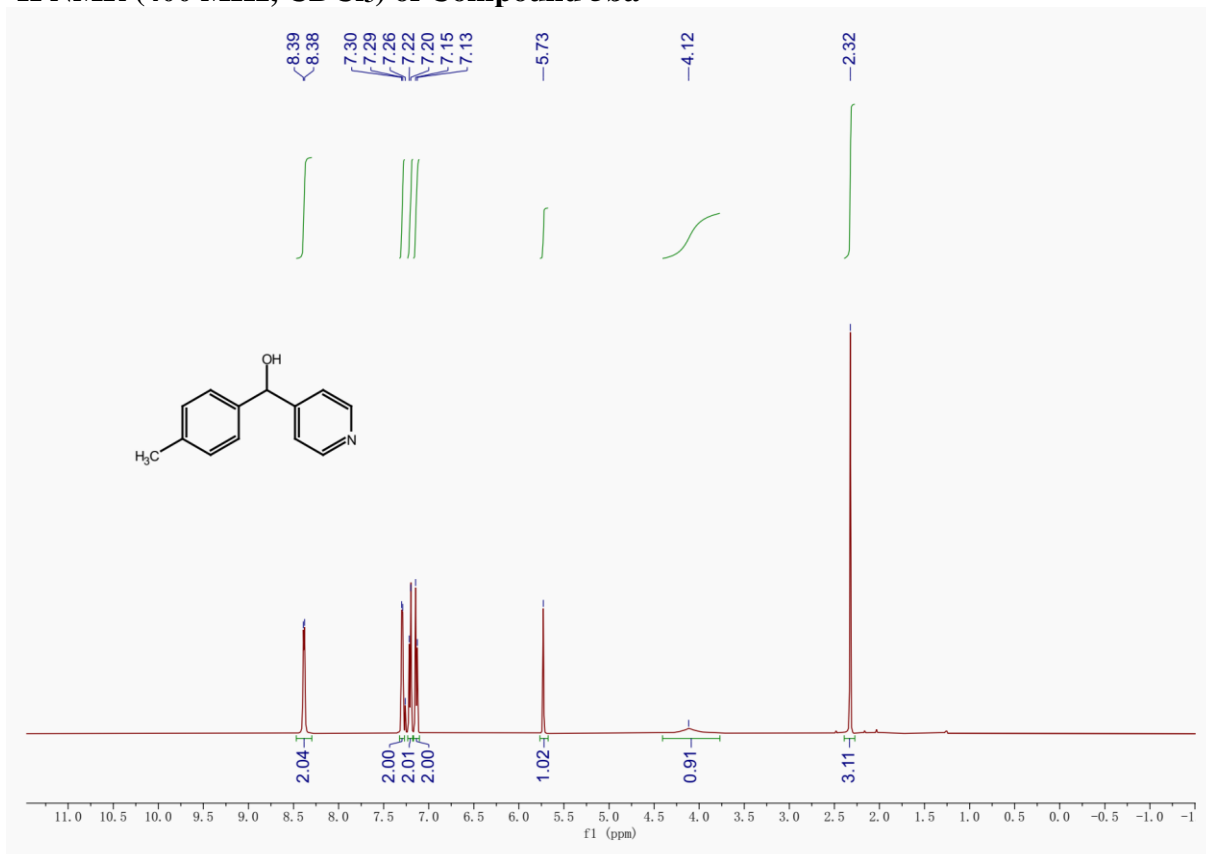

### $^{13}\text{C}\{^1\text{H}\}$ NMR (101 MHz, $\text{CDCl}_3$ ) of Compound 5ba

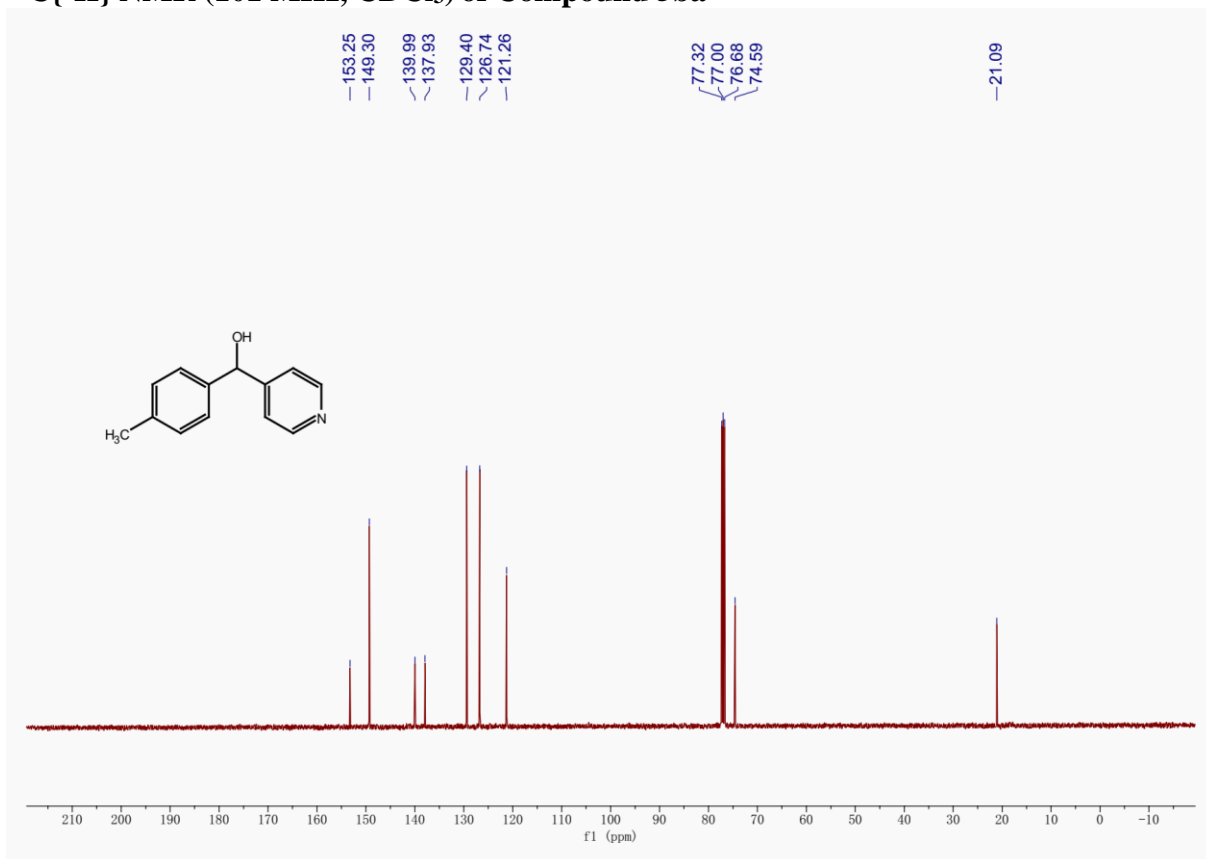

### $^1\text{H}$ NMR (400 MHz, $\text{CDCl}_3$ ) of Compound 5ca

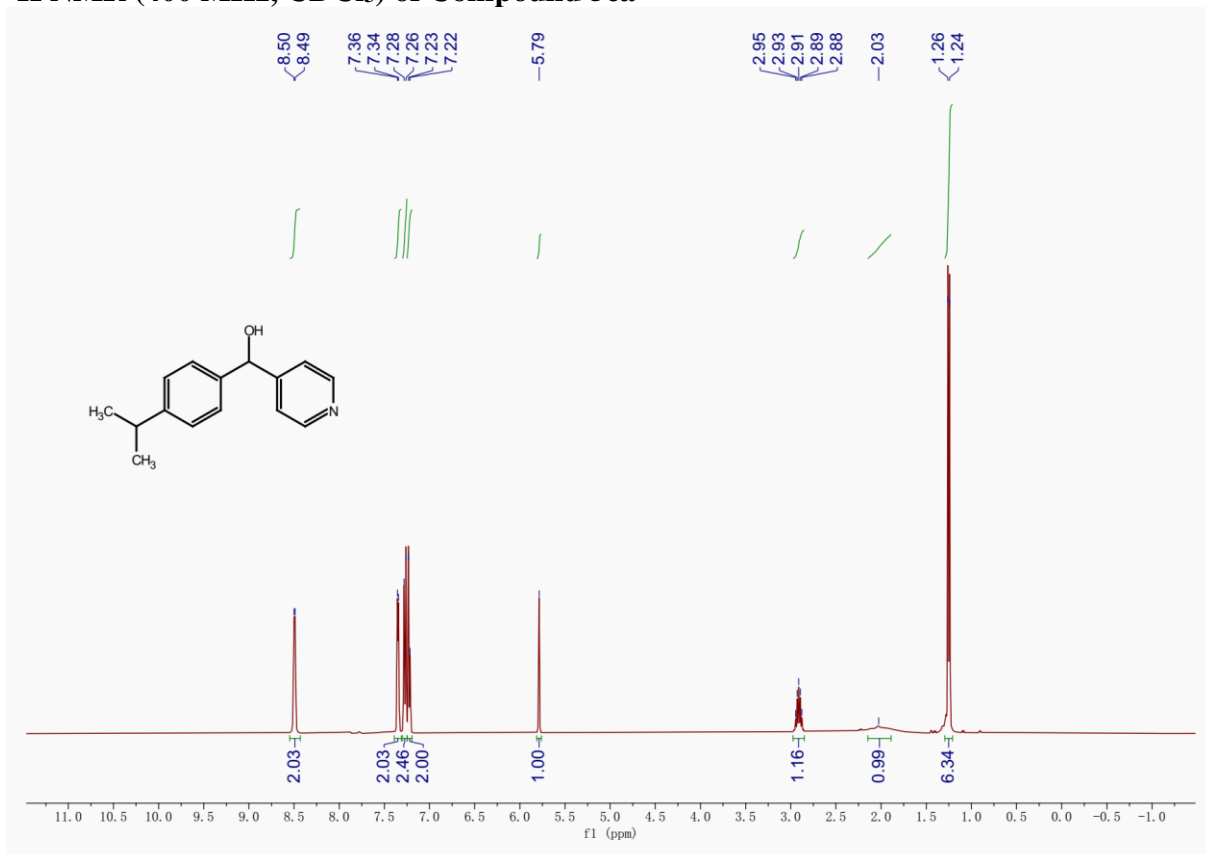

### $^{13}\text{C}\{^1\text{H}\}$ NMR (101 MHz, $\text{CDCl}_3$ ) of Compound 5ca

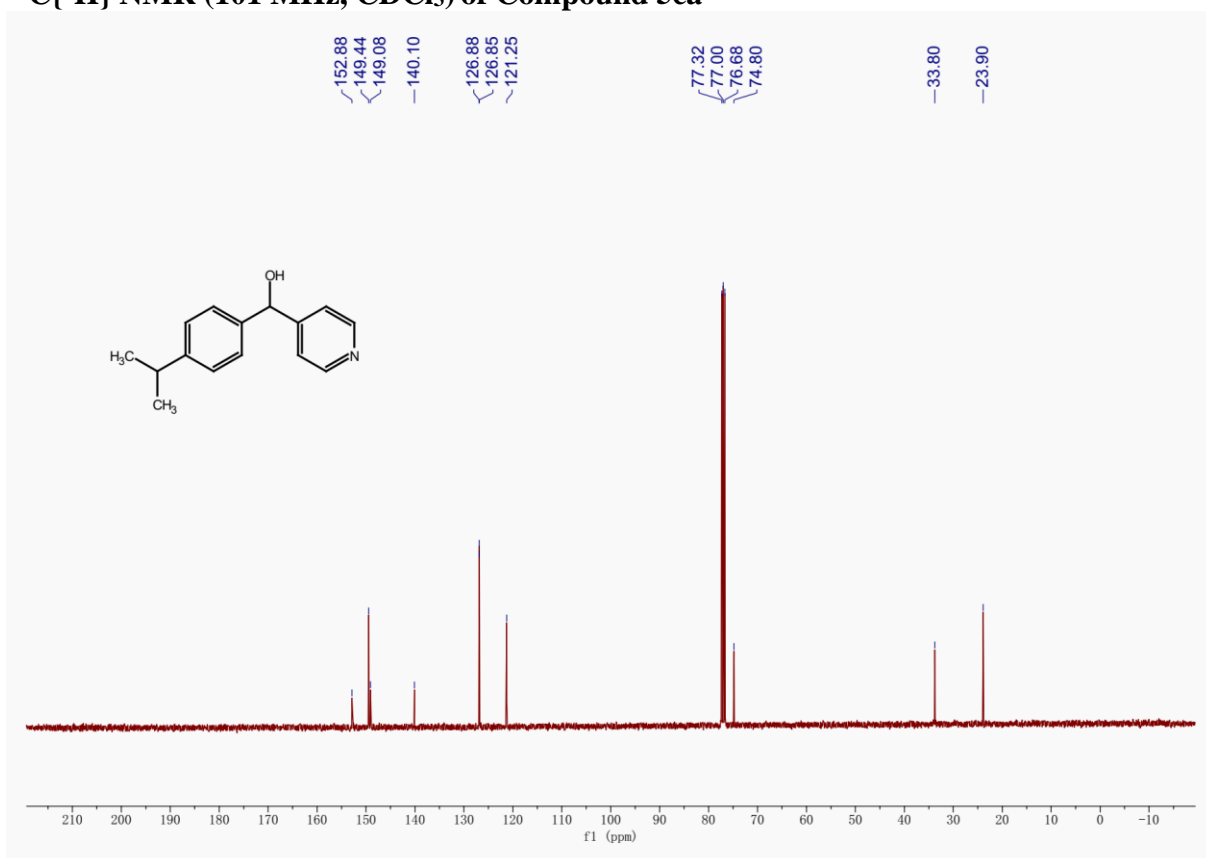



### $^1\text{H}$ NMR (400 MHz, $\text{CDCl}_3$ ) of Compound 5da

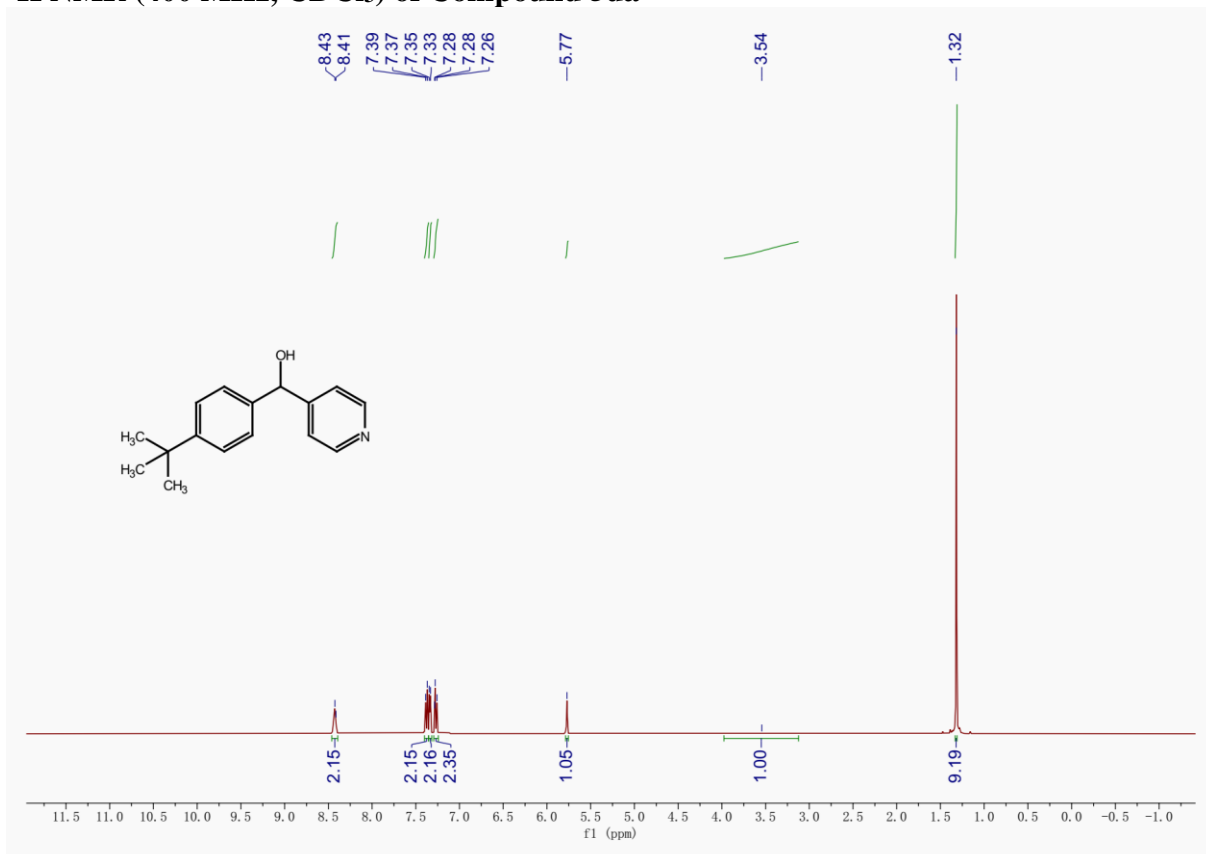

### $^{13}\text{C}\{^1\text{H}\}$ NMR (101 MHz, $\text{CDCl}_3$ ) of Compound 5da

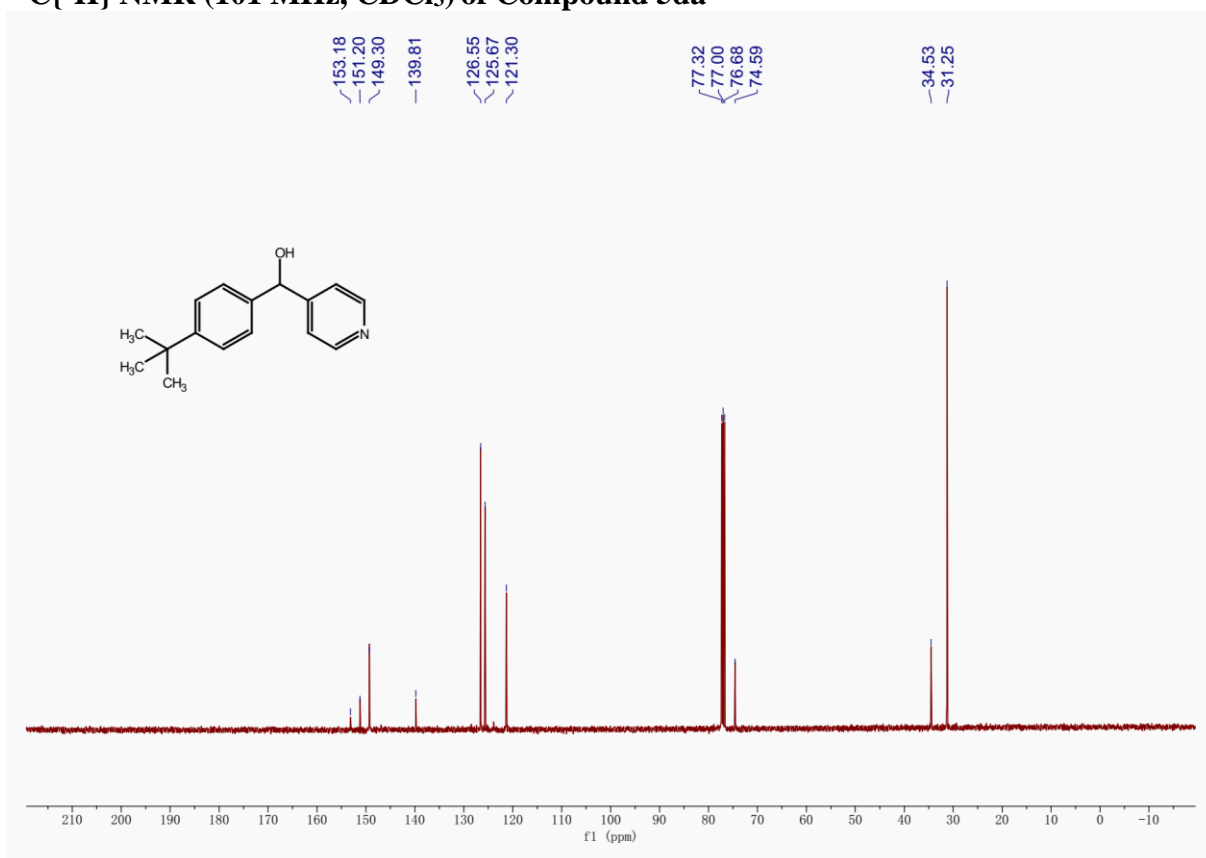

### $^1\text{H}$ NMR (400 MHz, $\text{DMSO-}d_6$ ) of Compound 5ea

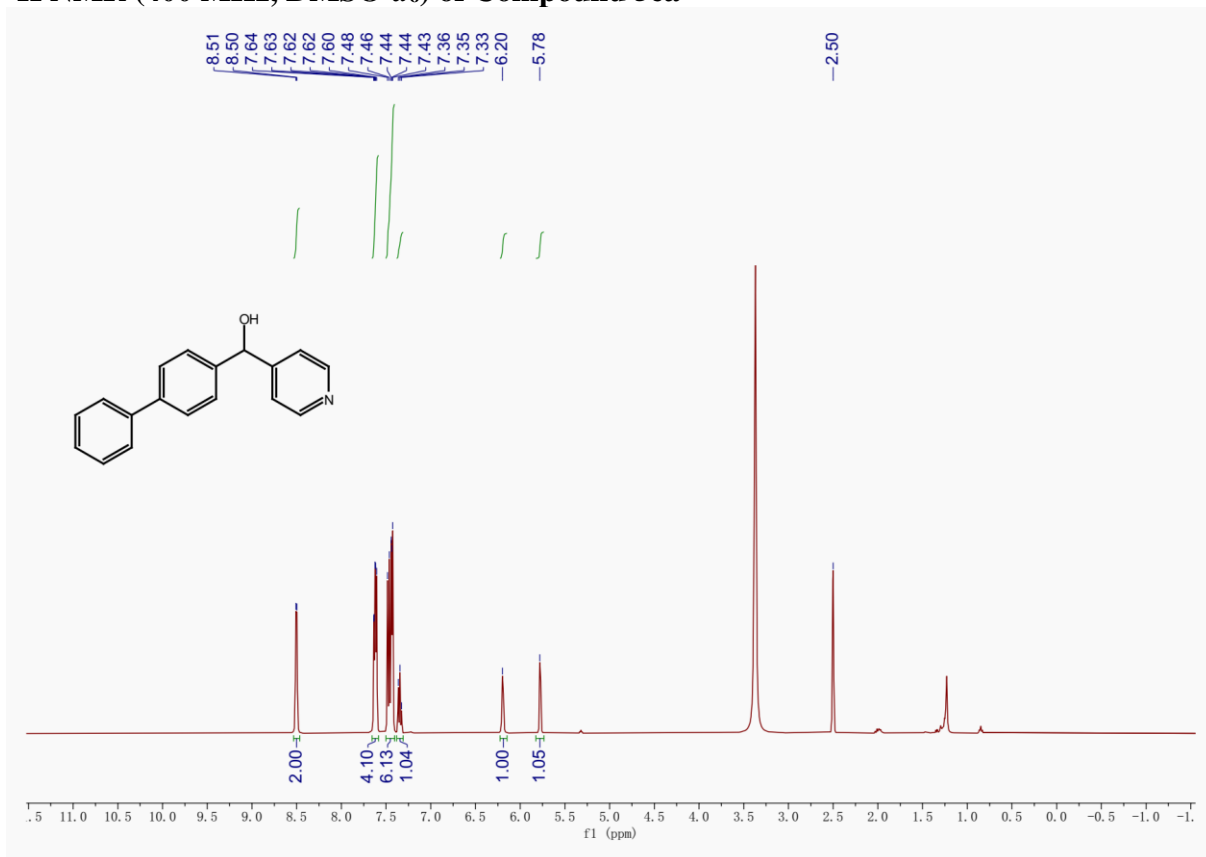

### $^{13}\text{C}\{^1\text{H}\}$ NMR (101 MHz, $\text{DMSO-}d_6$ ) of Compound 5ea

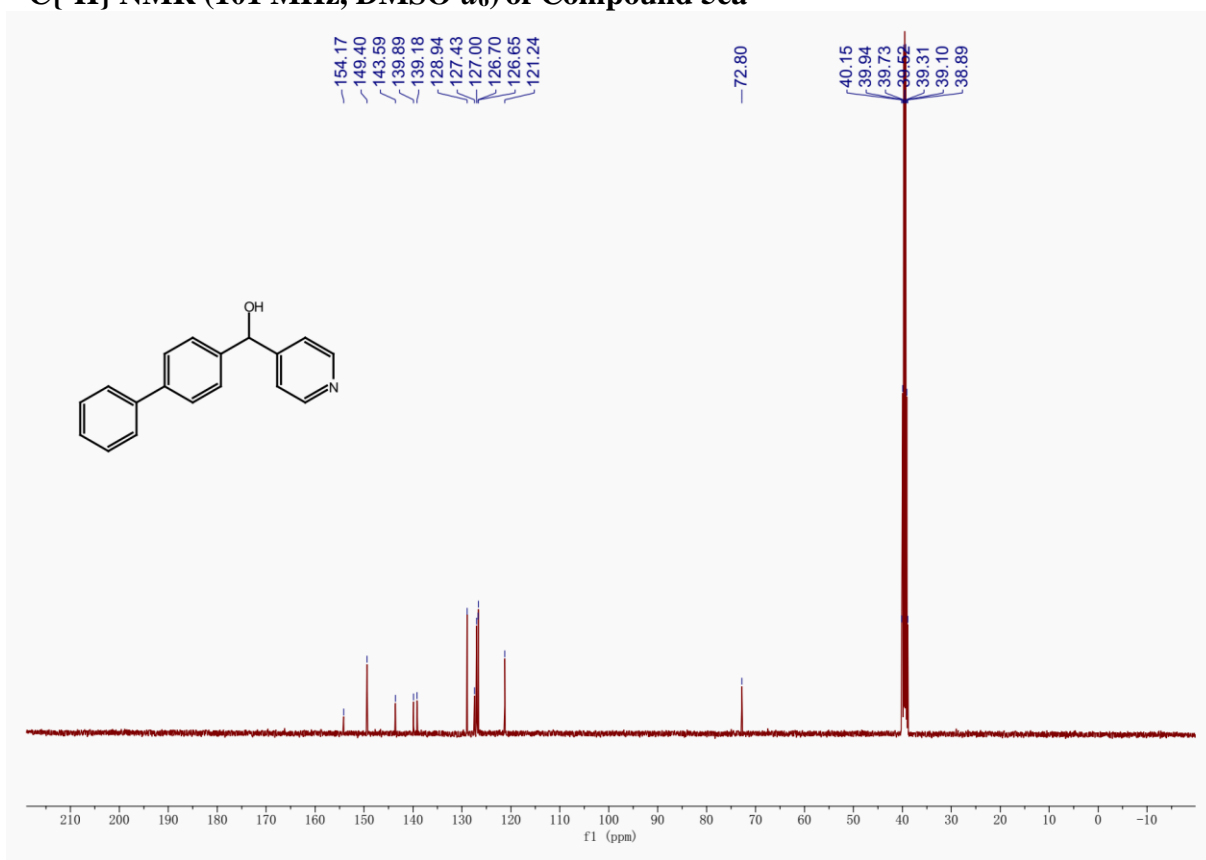

### $^1\text{H}$ NMR (400 MHz, $\text{CDCl}_3$ ) of Compound 5fa

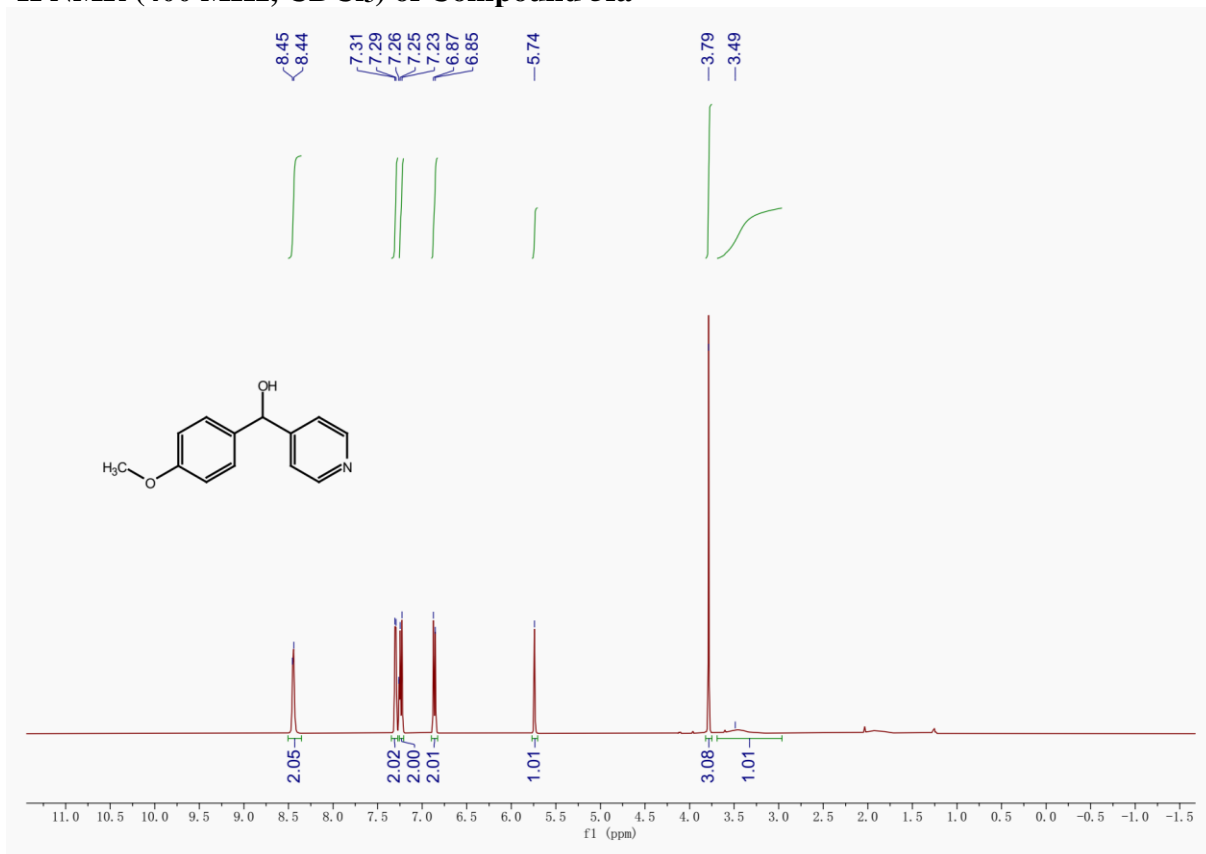

### $^{13}\text{C}\{^1\text{H}\}$ NMR (101 MHz, $\text{CDCl}_3$ ) of Compound 5fa

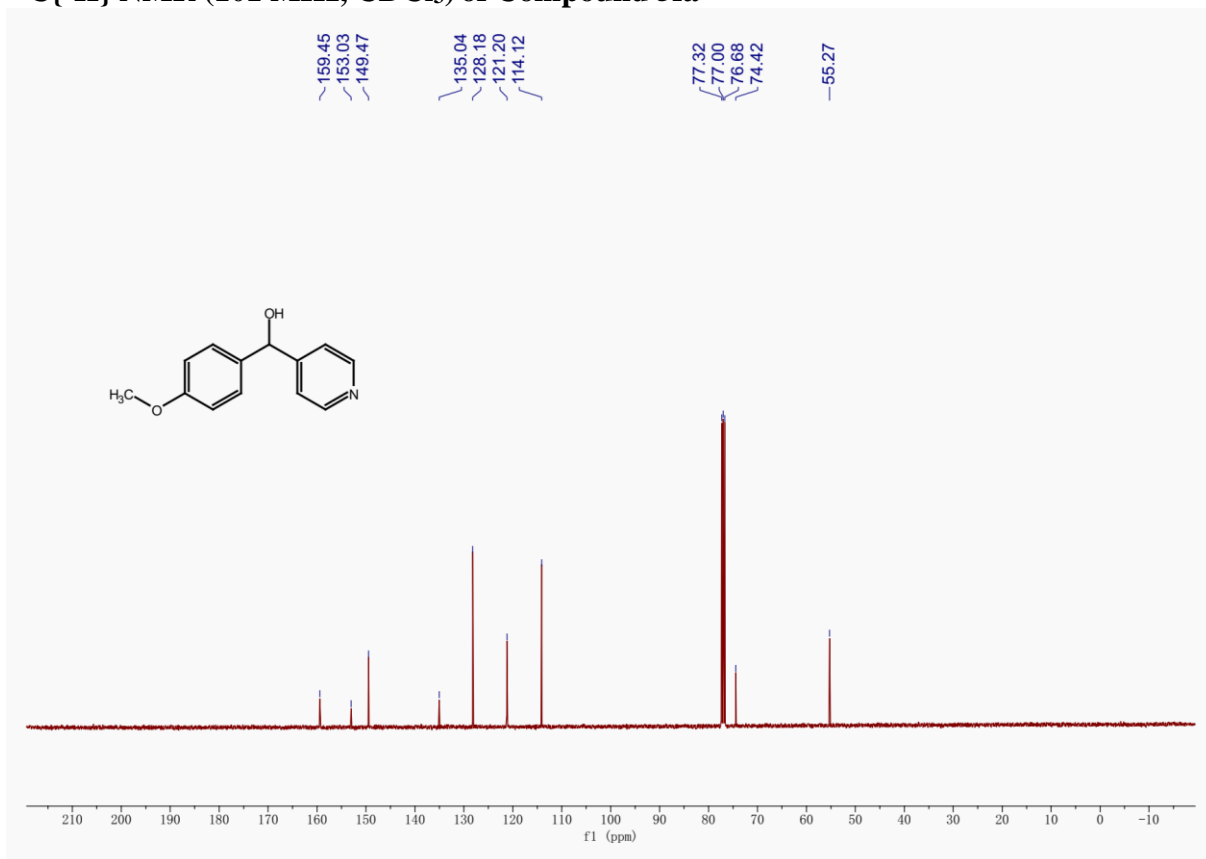

### $^1\text{H}$ NMR (400 MHz, $\text{CDCl}_3$ ) of Compound 5ga

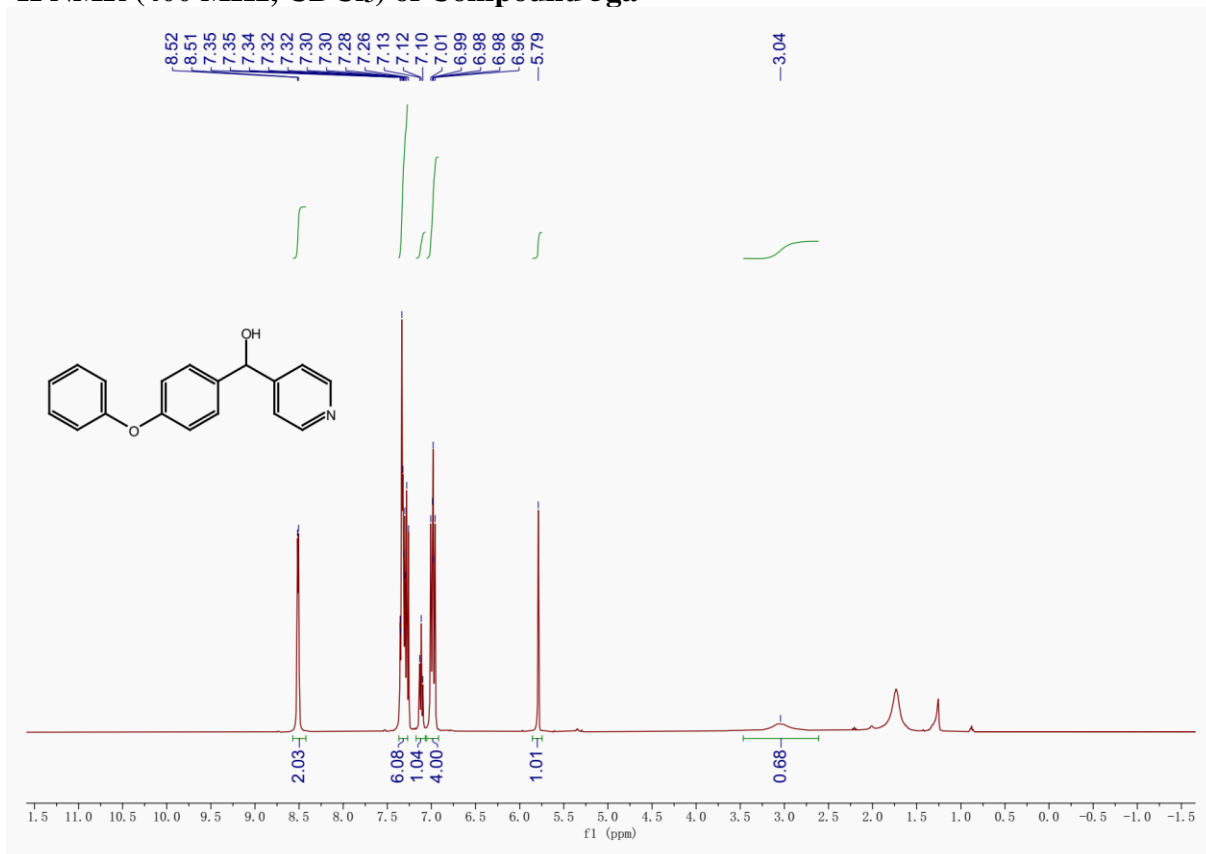

### $^{13}\text{C}\{^1\text{H}\}$ NMR (101 MHz, $\text{CDCl}_3$ ) of Compound 5ga

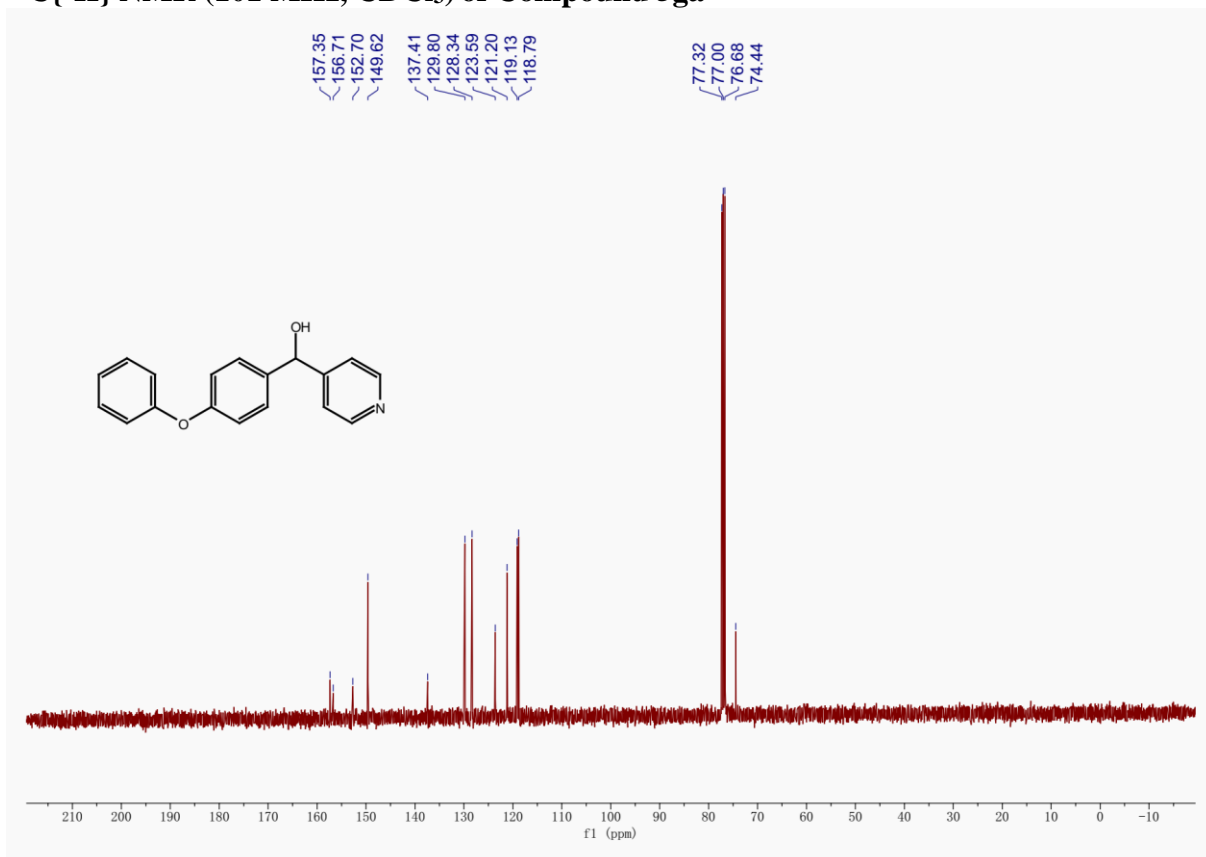

### $^1\text{H}$ NMR (400 MHz, $\text{CDCl}_3$ ) of Compound 5ha

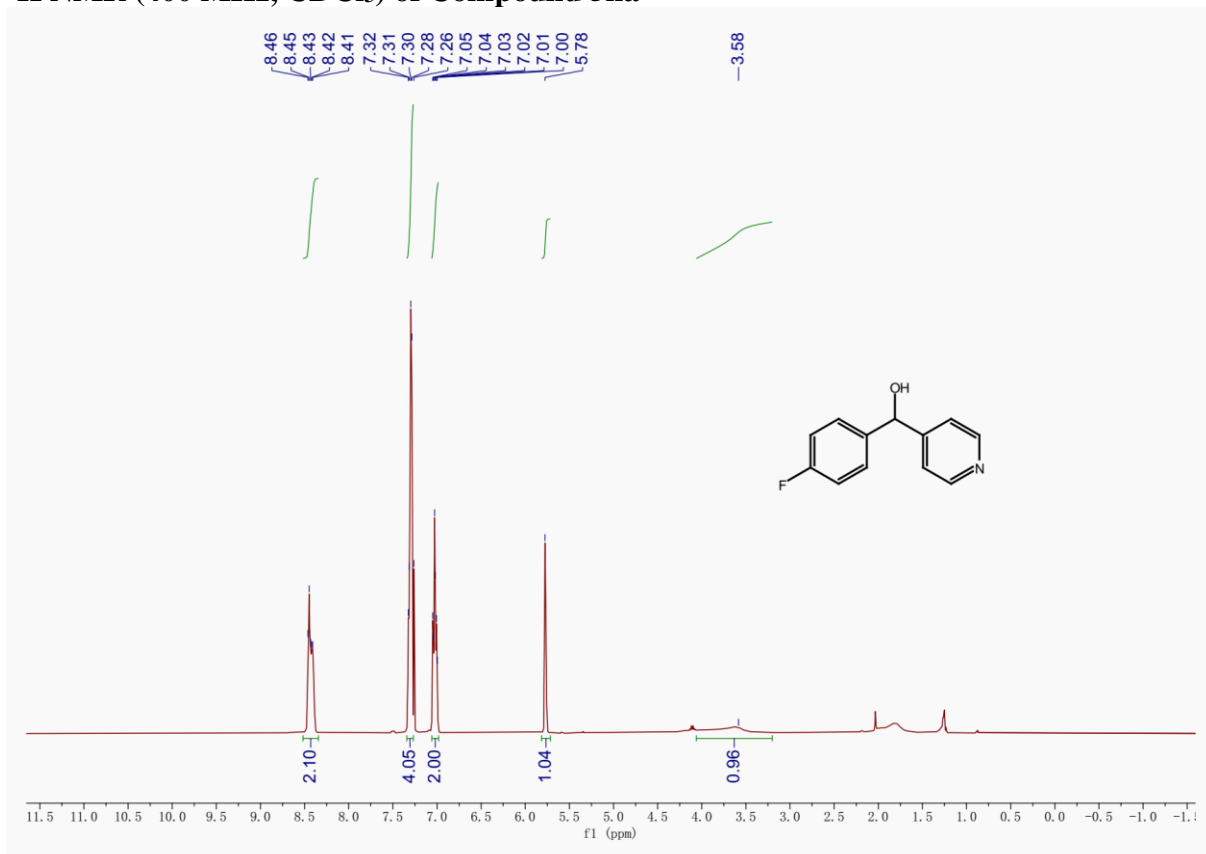

### $^{13}\text{C}\{^1\text{H}\}$ NMR (101 MHz, $\text{CDCl}_3$ ) of Compound 5ha

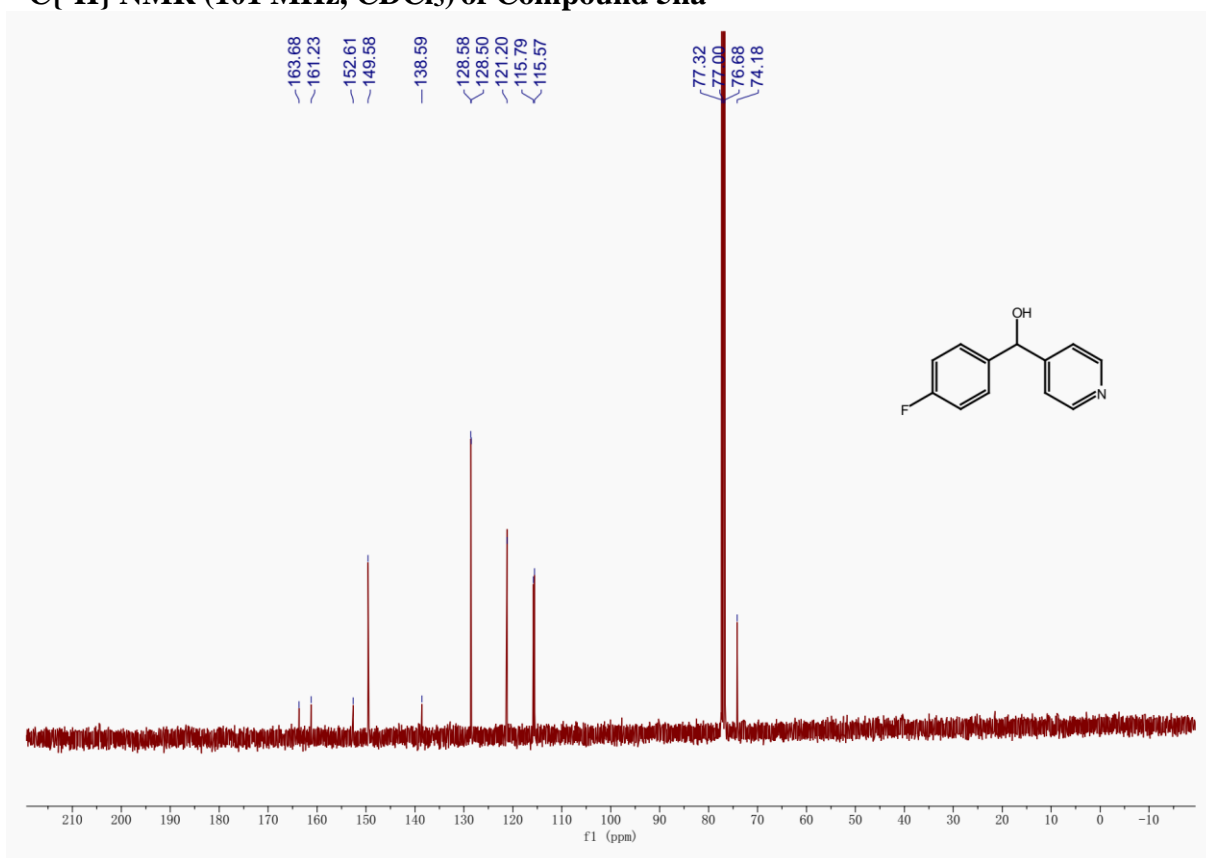

**<sup>19</sup>F NMR (376 MHz, CDCl<sub>3</sub>) of Compound 5ha**

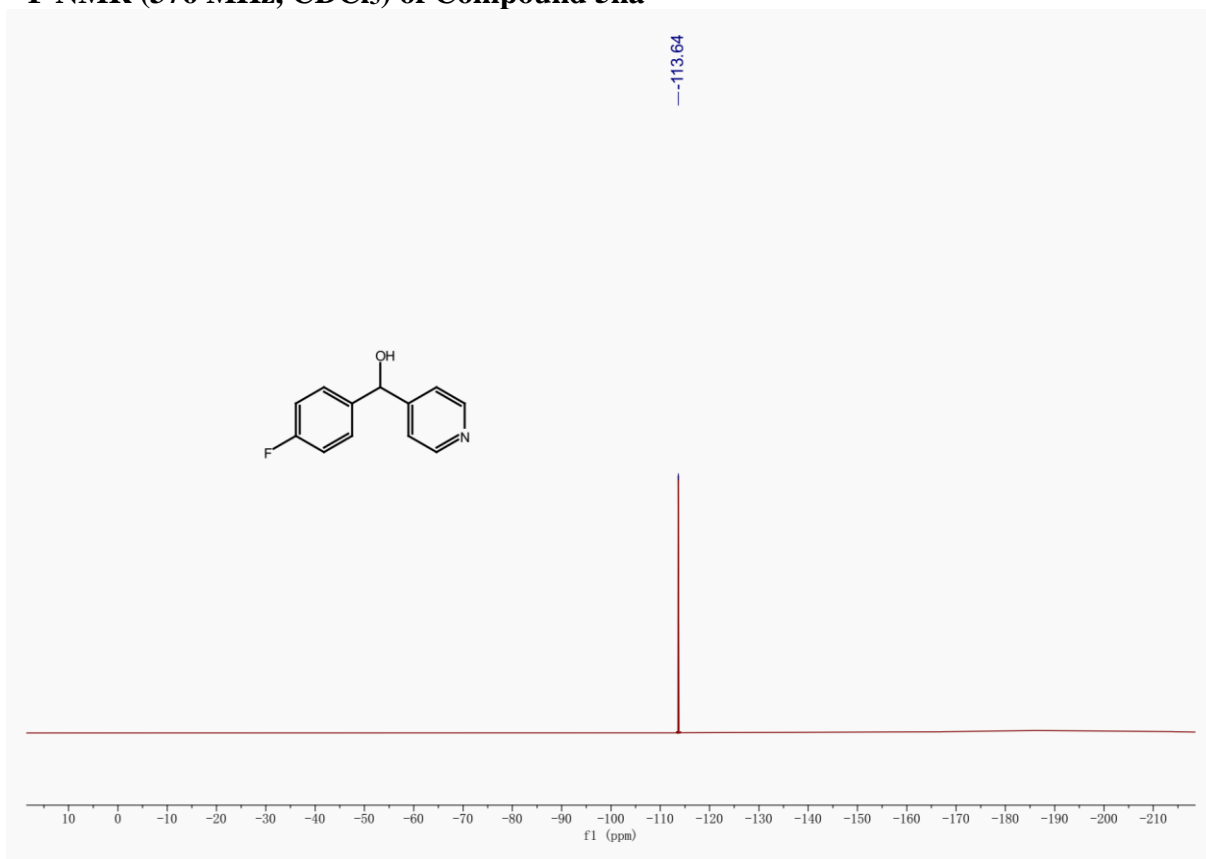

### $^1\text{H}$ NMR (400 MHz, $\text{CDCl}_3$ ) of Compound 5ia

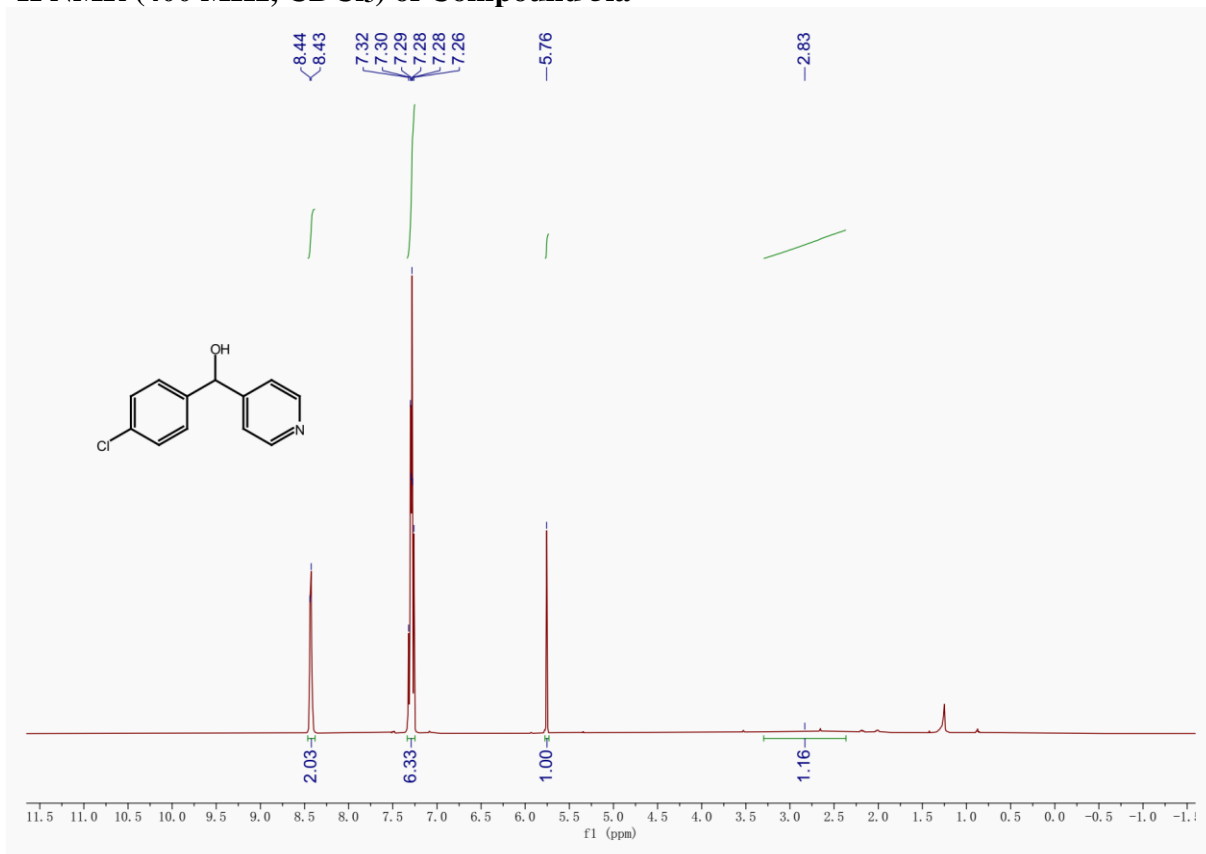

### $^{13}\text{C}\{^1\text{H}\}$ NMR (101 MHz, $\text{CDCl}_3$ ) of Compound 5ia

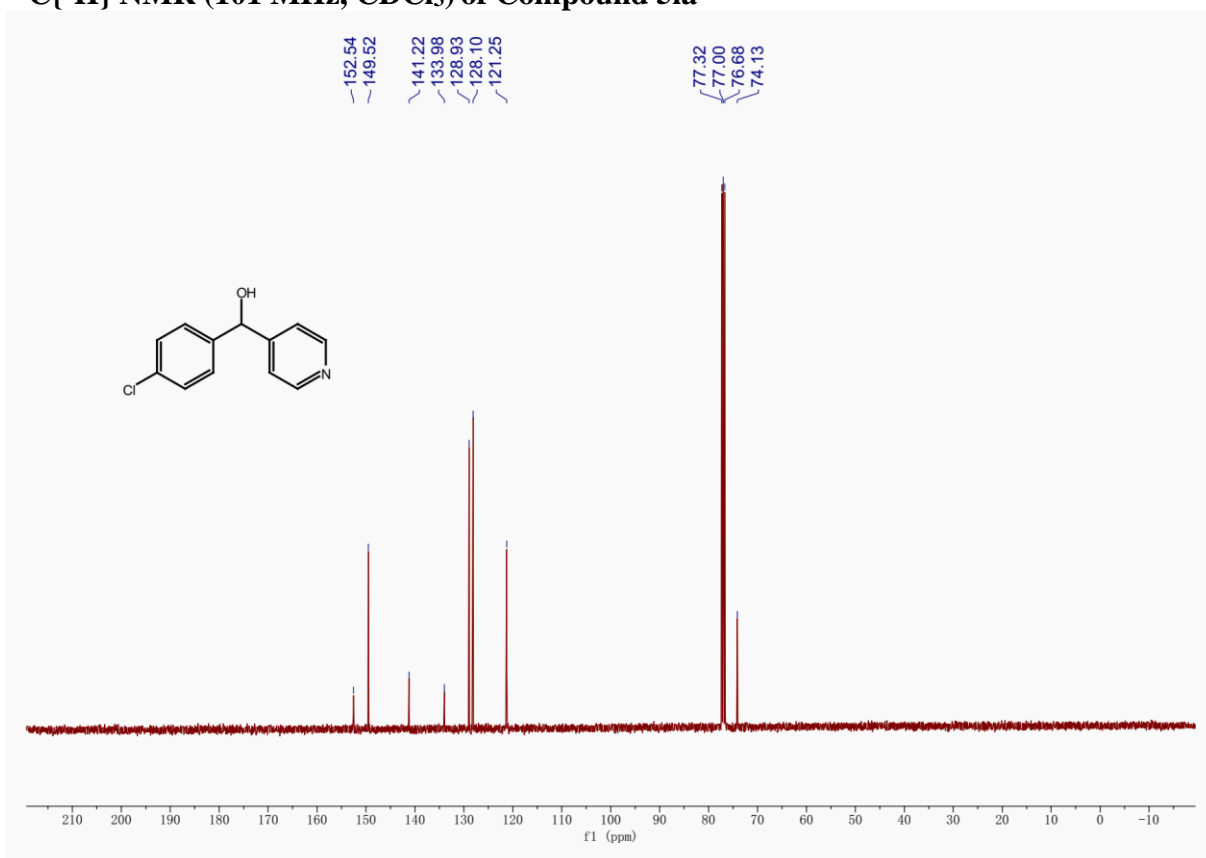

### <sup>1</sup>H NMR (400 MHz, CDCl<sub>3</sub>) of Compound 5ja

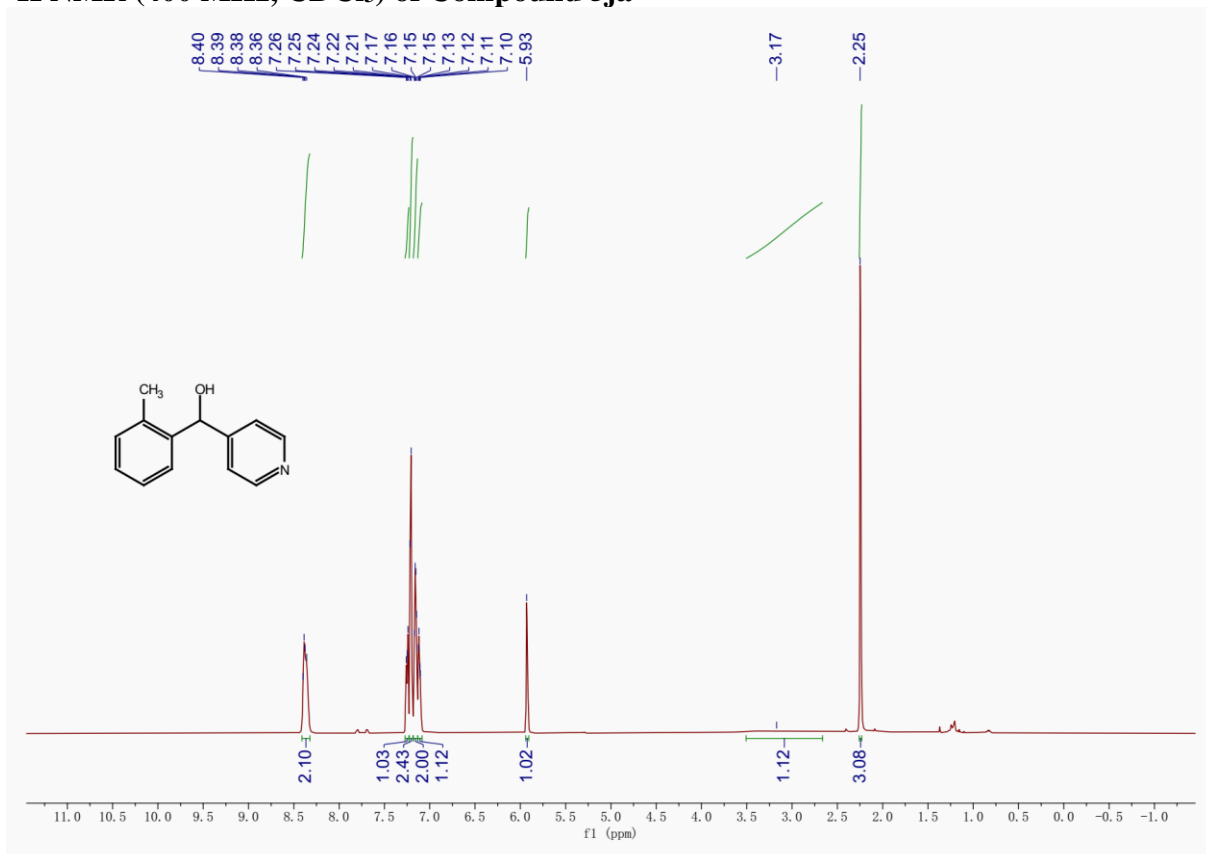

### <sup>13</sup>C{<sup>1</sup>H} NMR (101 MHz, CDCl<sub>3</sub>) of Compound 5ja

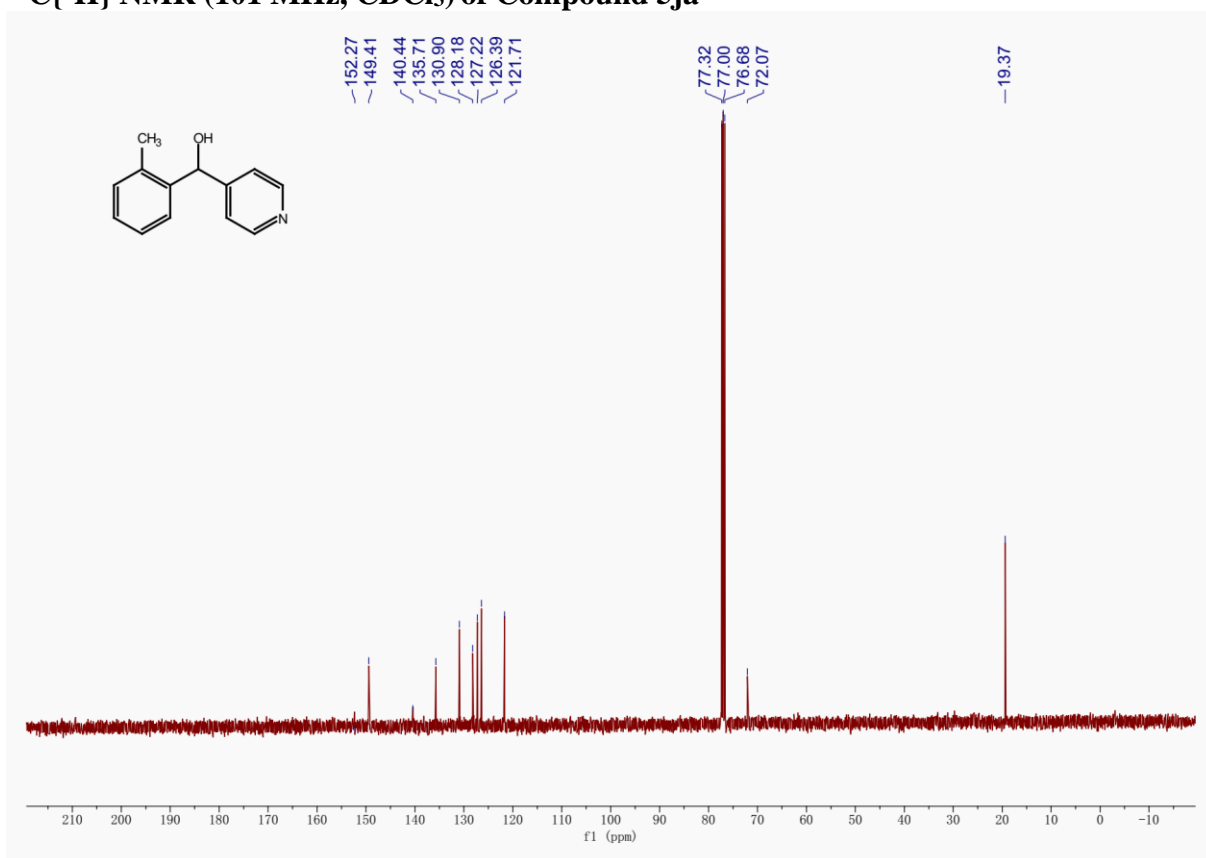



### $^1\text{H}$ NMR (400 MHz, $\text{CDCl}_3$ ) of Compound 5ka

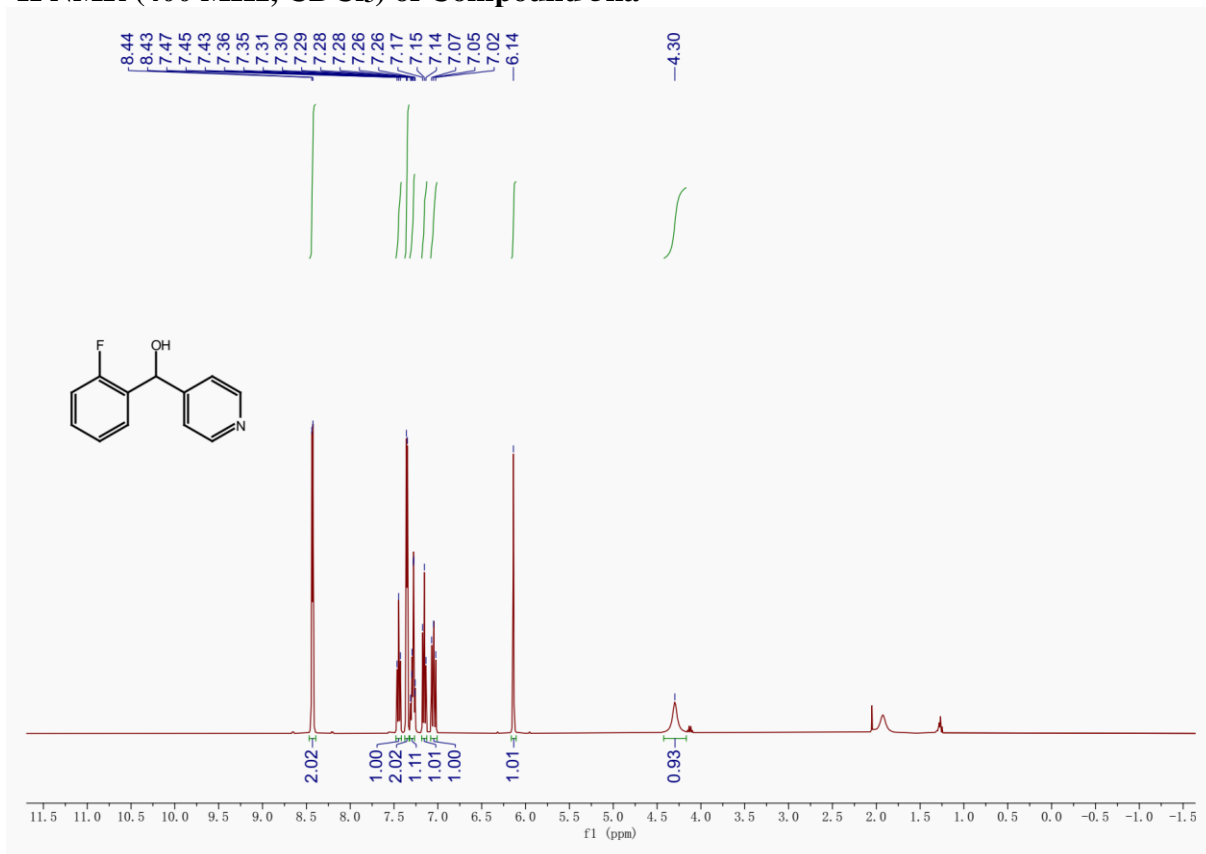

### $^{13}\text{C}\{^1\text{H}\}$ NMR (101 MHz, $\text{CDCl}_3$ ) of Compound 5ka

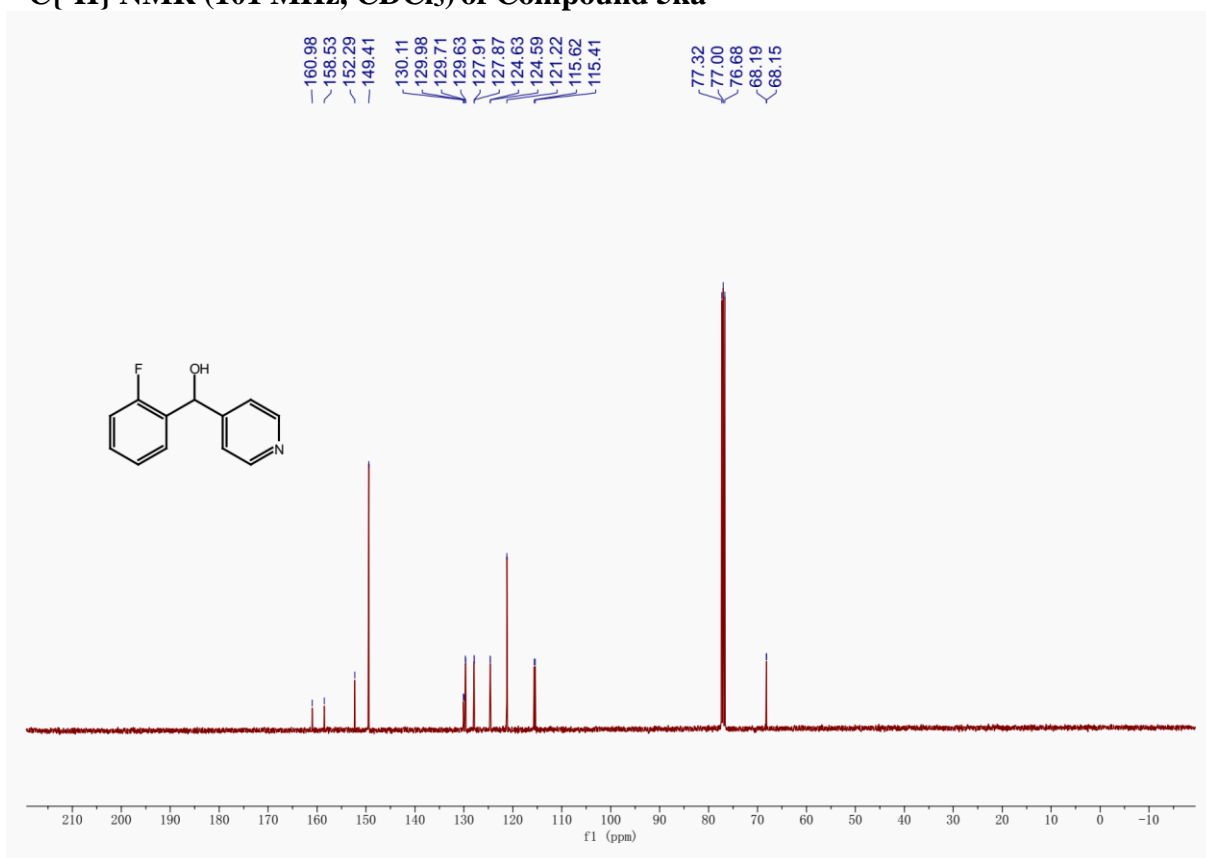

**<sup>19</sup>F NMR (376 MHz, CDCl<sub>3</sub>) of Compound 5ka**

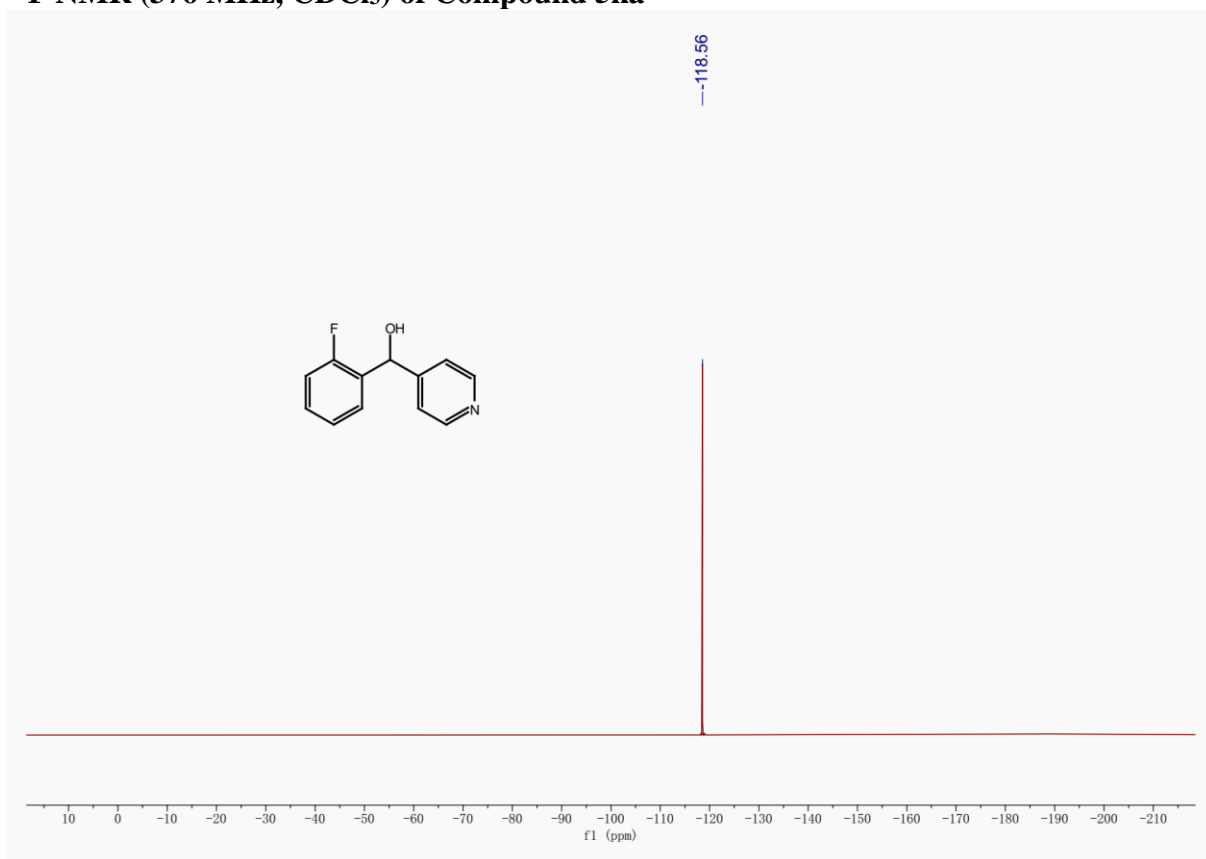

### $^1\text{H}$ NMR (400 MHz, $\text{CDCl}_3$ ) of Compound 5la

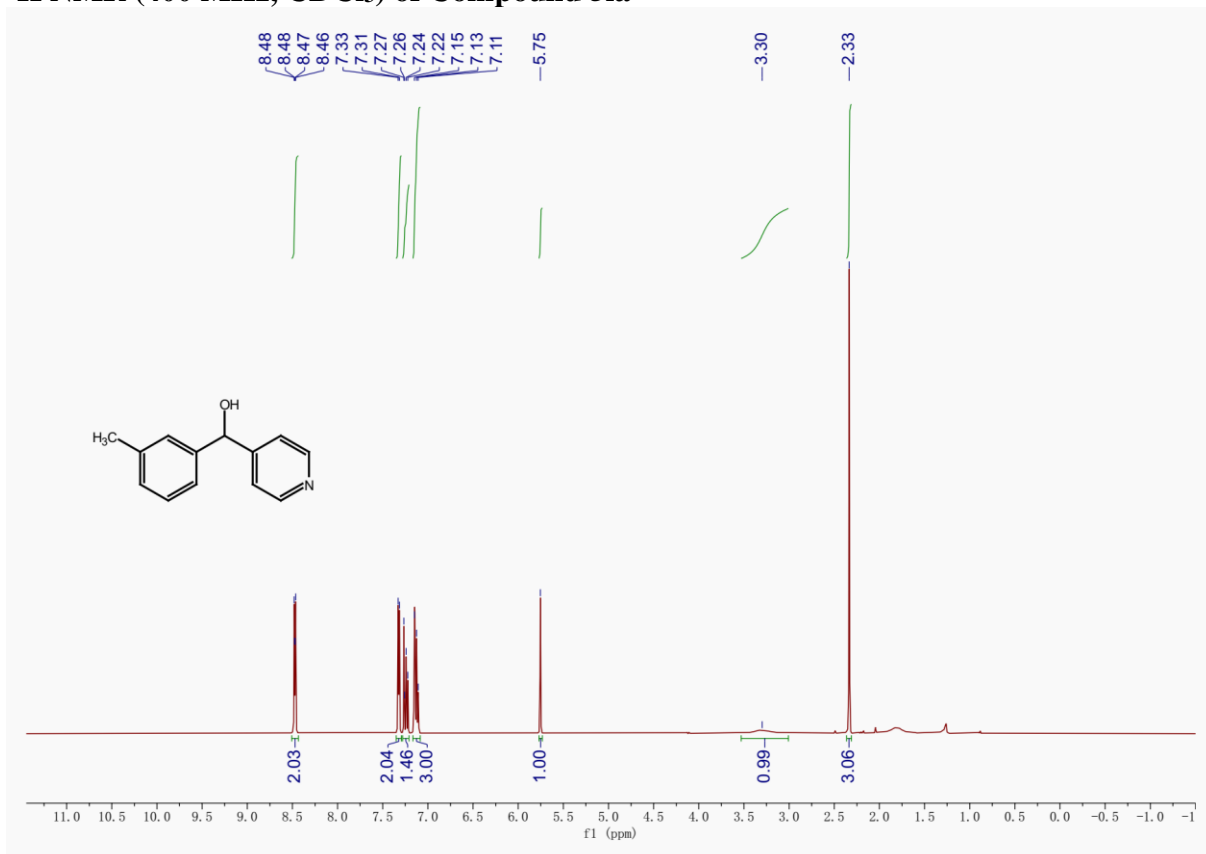

### $^{13}\text{C}\{^1\text{H}\}$ NMR (101 MHz, $\text{CDCl}_3$ ) of Compound 5la

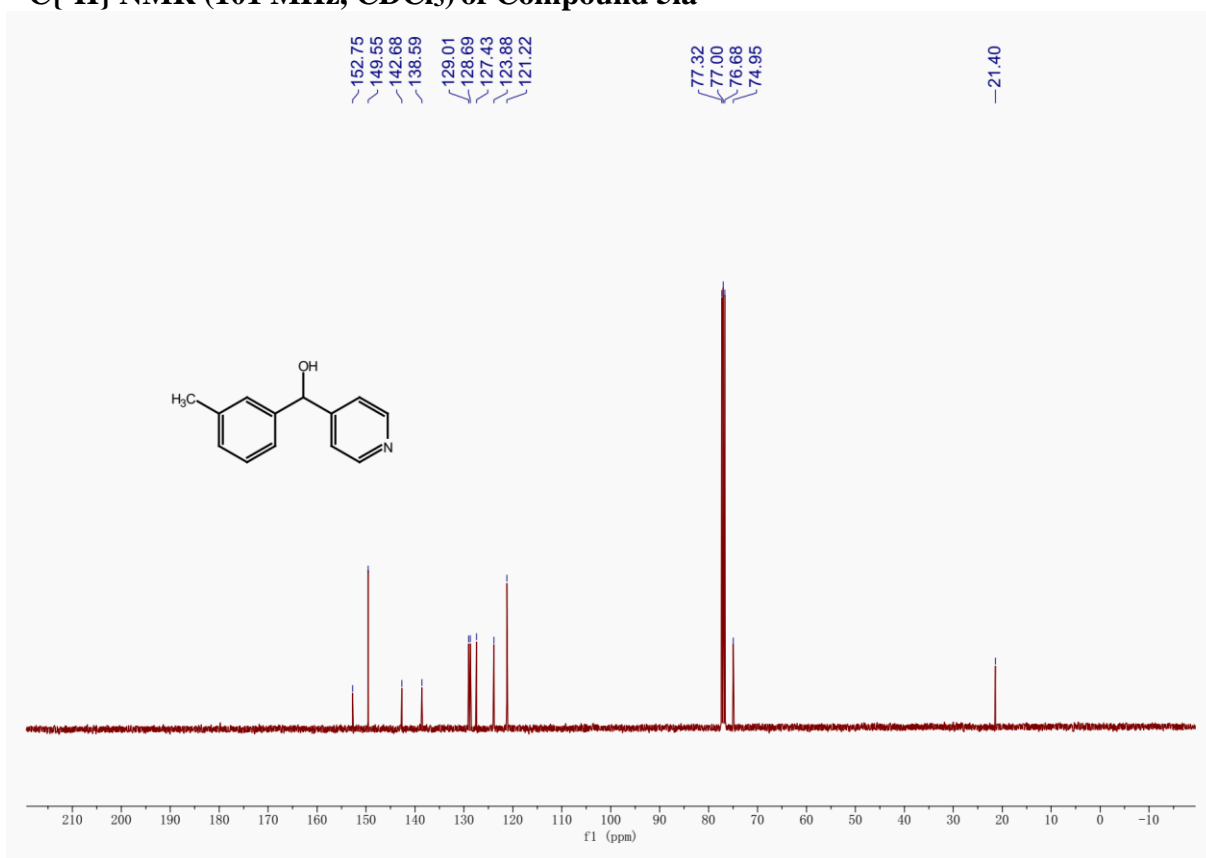

### $^1\text{H}$ NMR (400 MHz, $\text{CDCl}_3$ ) of Compound 5ma

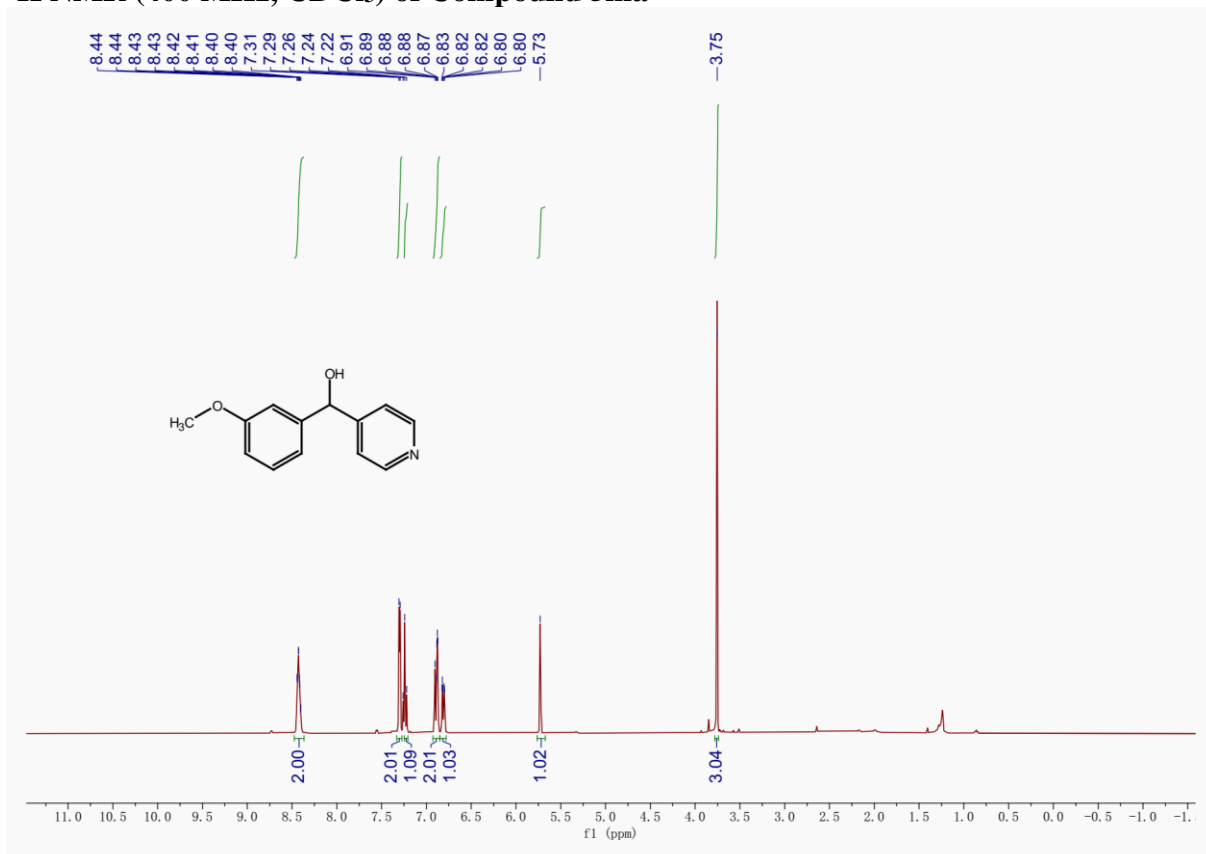

### $^{13}\text{C}\{^1\text{H}\}$ NMR (101 MHz, $\text{CDCl}_3$ ) of Compound 5ma

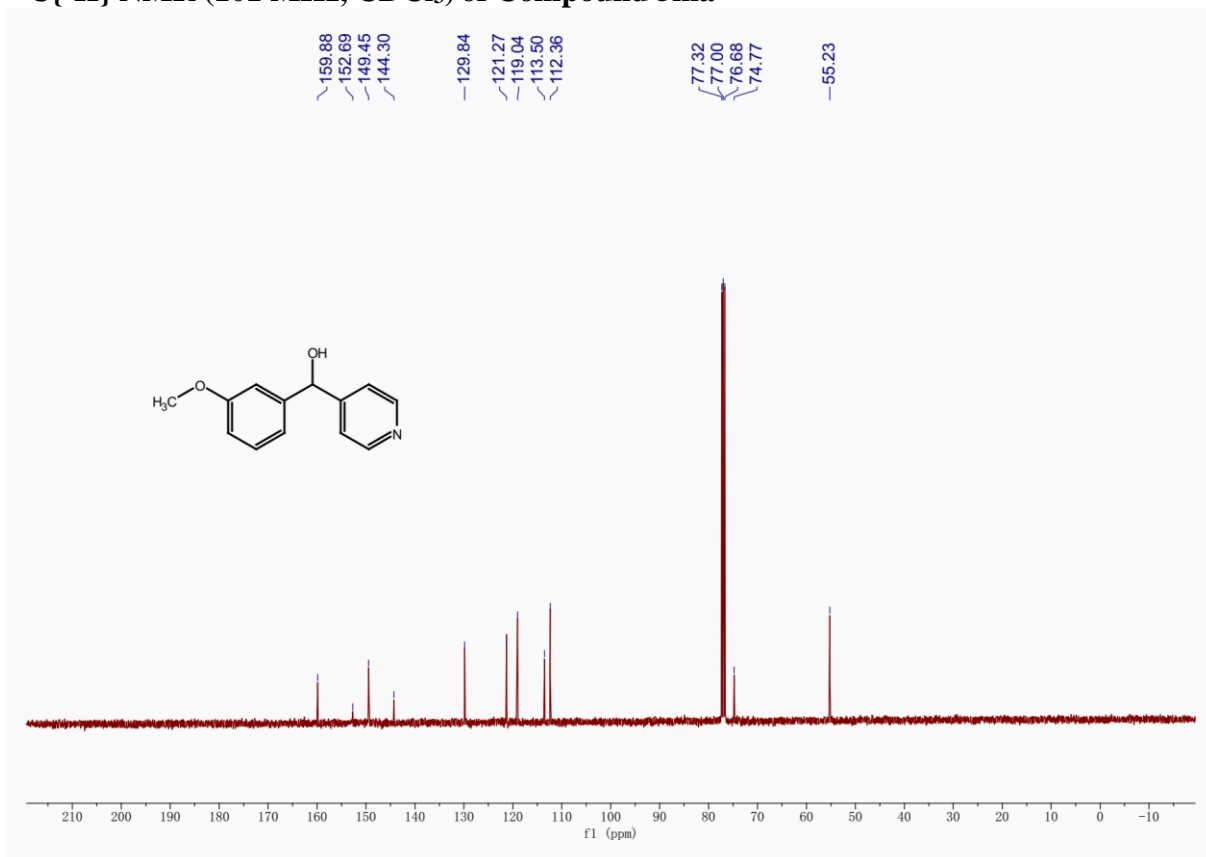

### $^1\text{H}$ NMR (400 MHz, $\text{CDCl}_3$ ) of Compound 5na

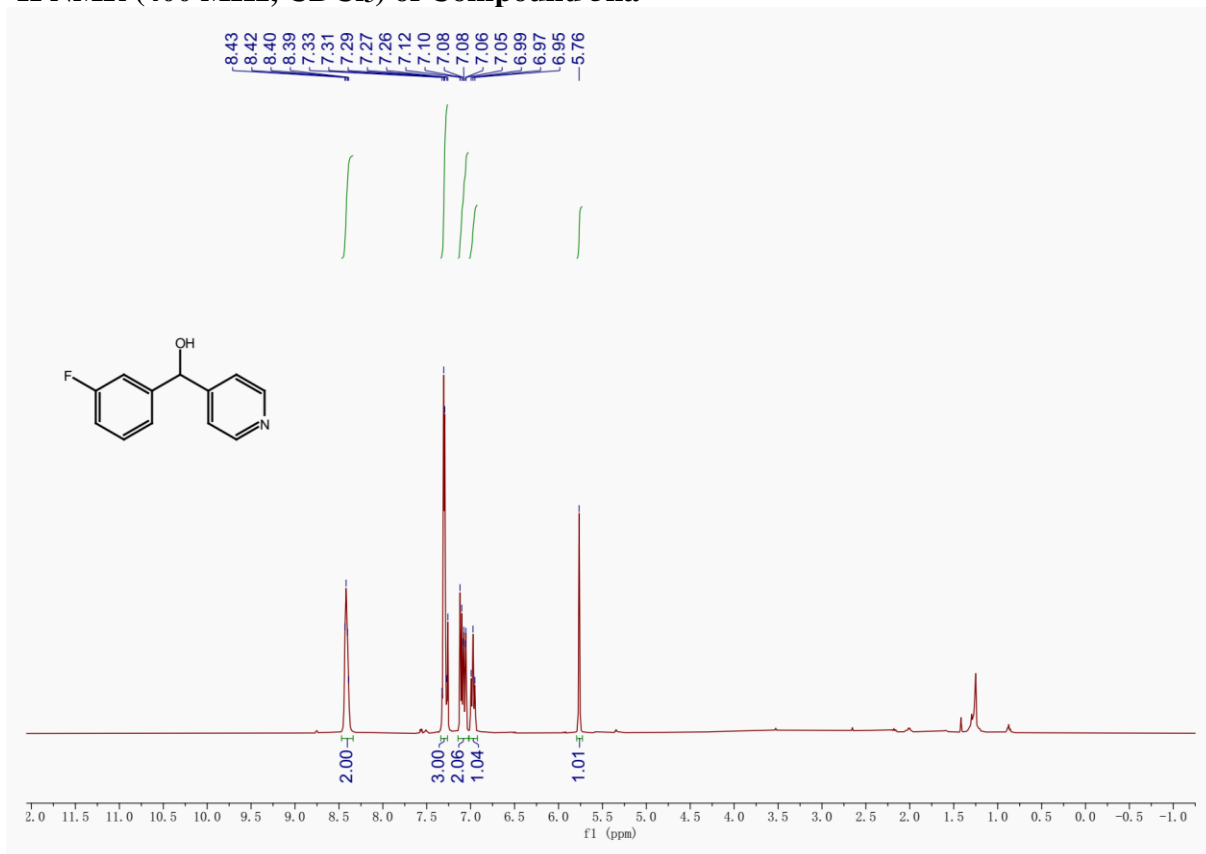

### $^{13}\text{C}\{^1\text{H}\}$ NMR (101 MHz, $\text{CDCl}_3$ ) of Compound 5na

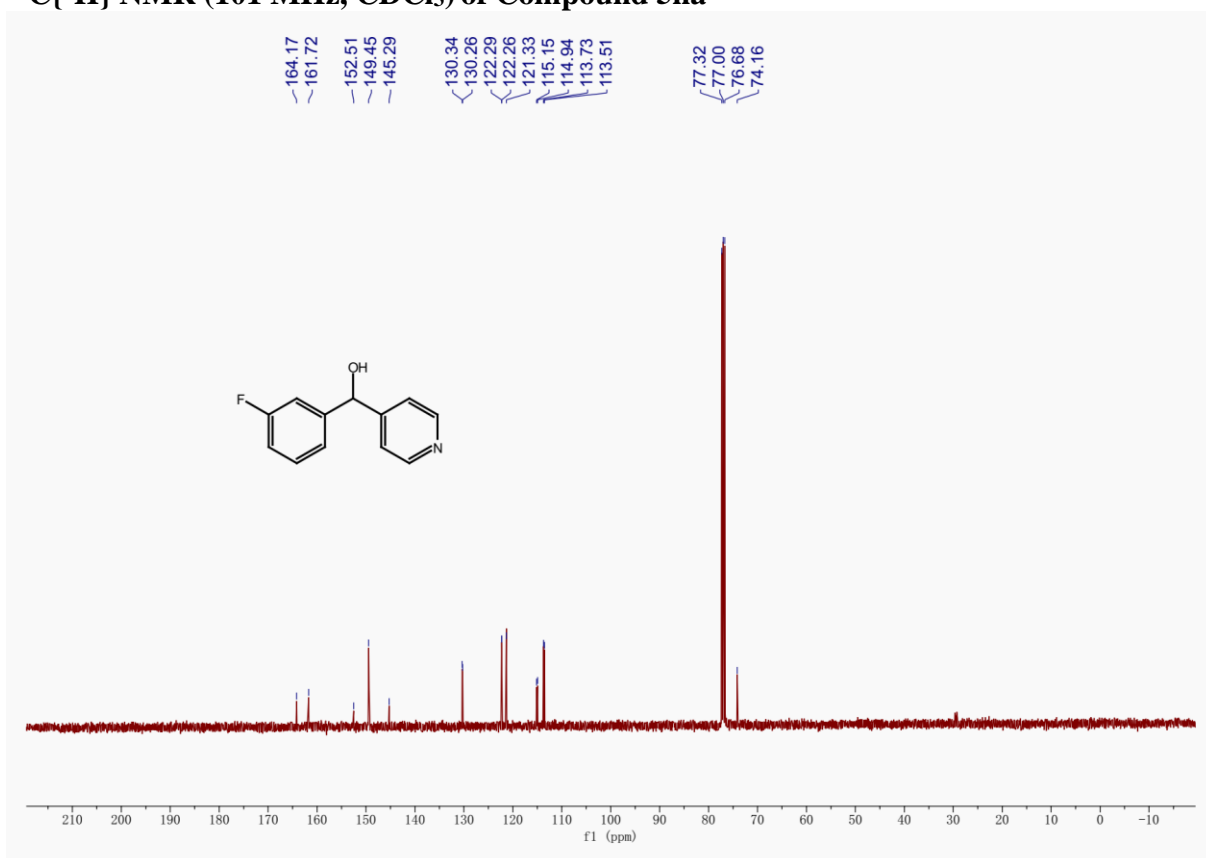

**<sup>19</sup>F NMR (376 MHz, CDCl<sub>3</sub>) of Compound 5na**

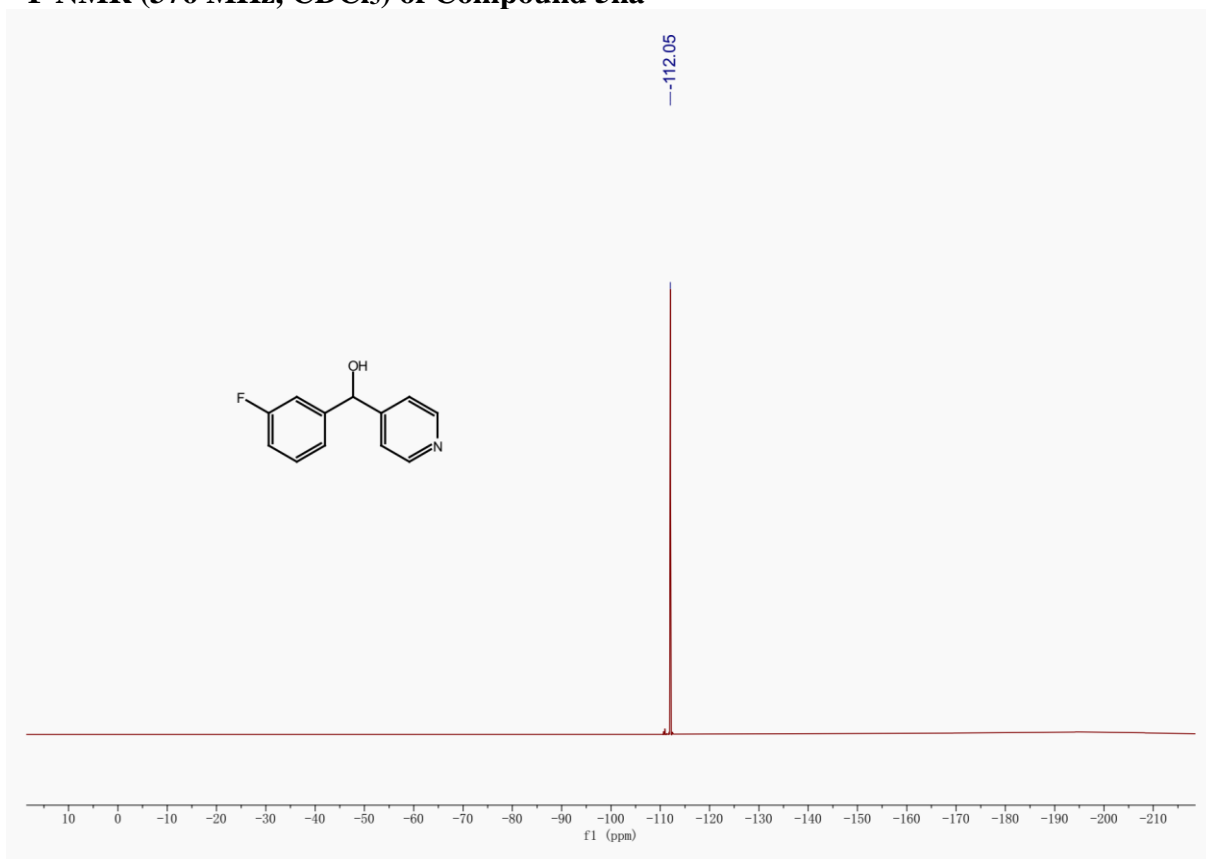

### $^1\text{H}$ NMR (400 MHz, $\text{CDCl}_3$ ) of Compound 5oa

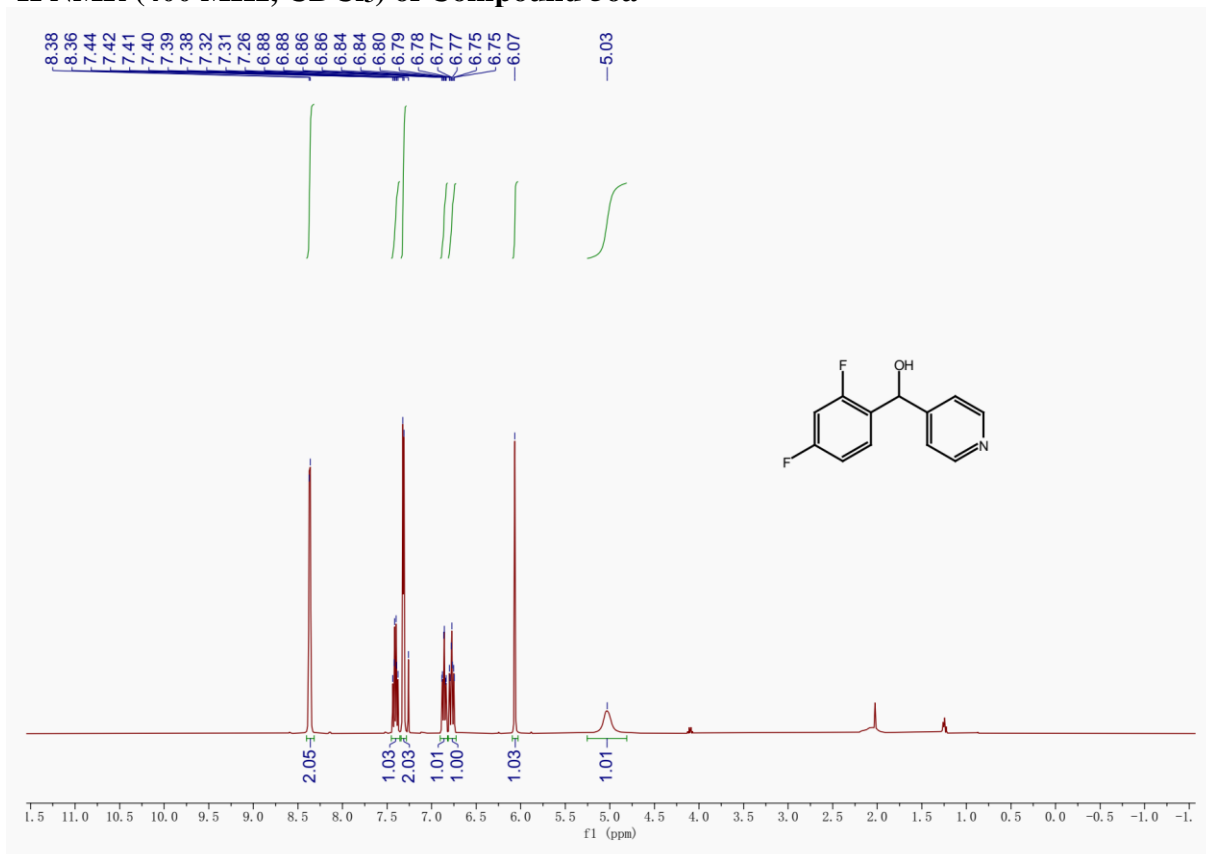

### $^{13}\text{C}\{^1\text{H}\}$ NMR (101 MHz, $\text{CDCl}_3$ ) of Compound 5oa

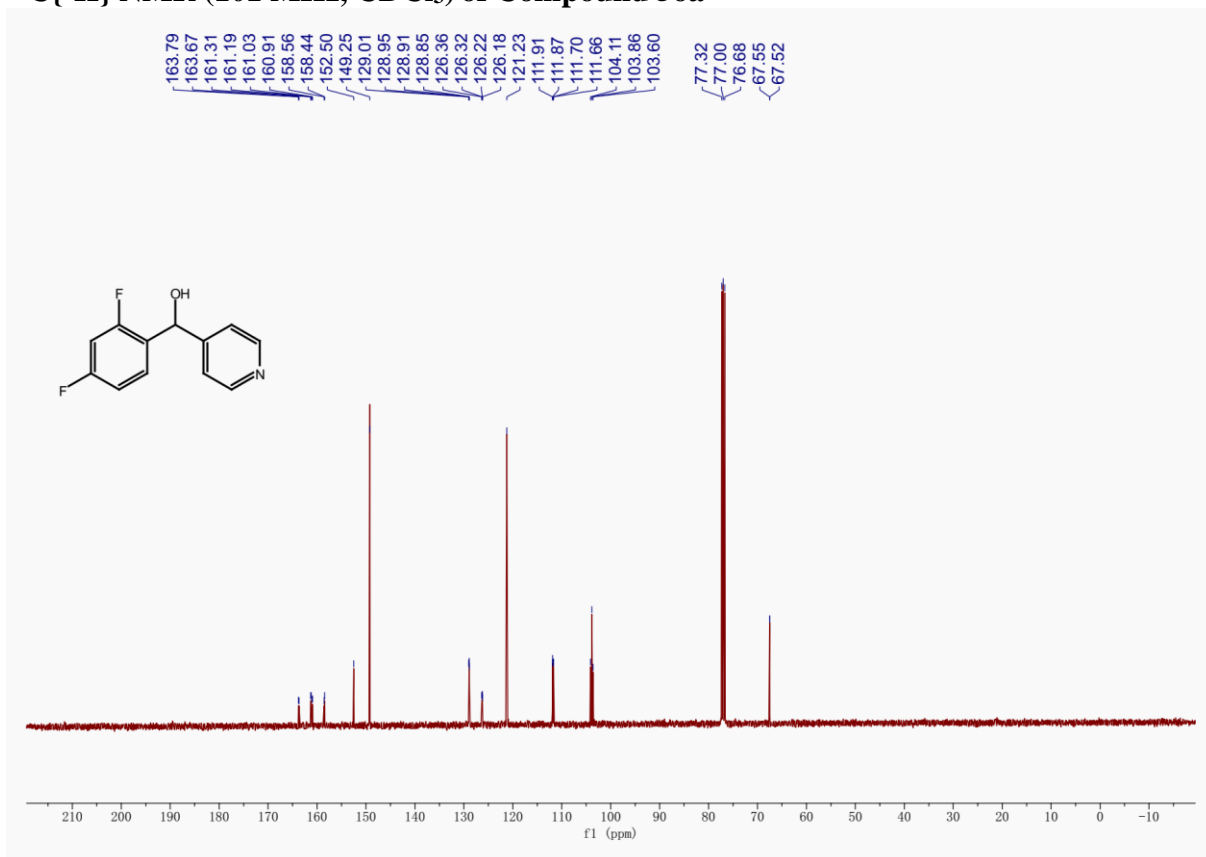

**<sup>19</sup>F NMR (376 MHz, CDCl<sub>3</sub>) of Compound 5oa**

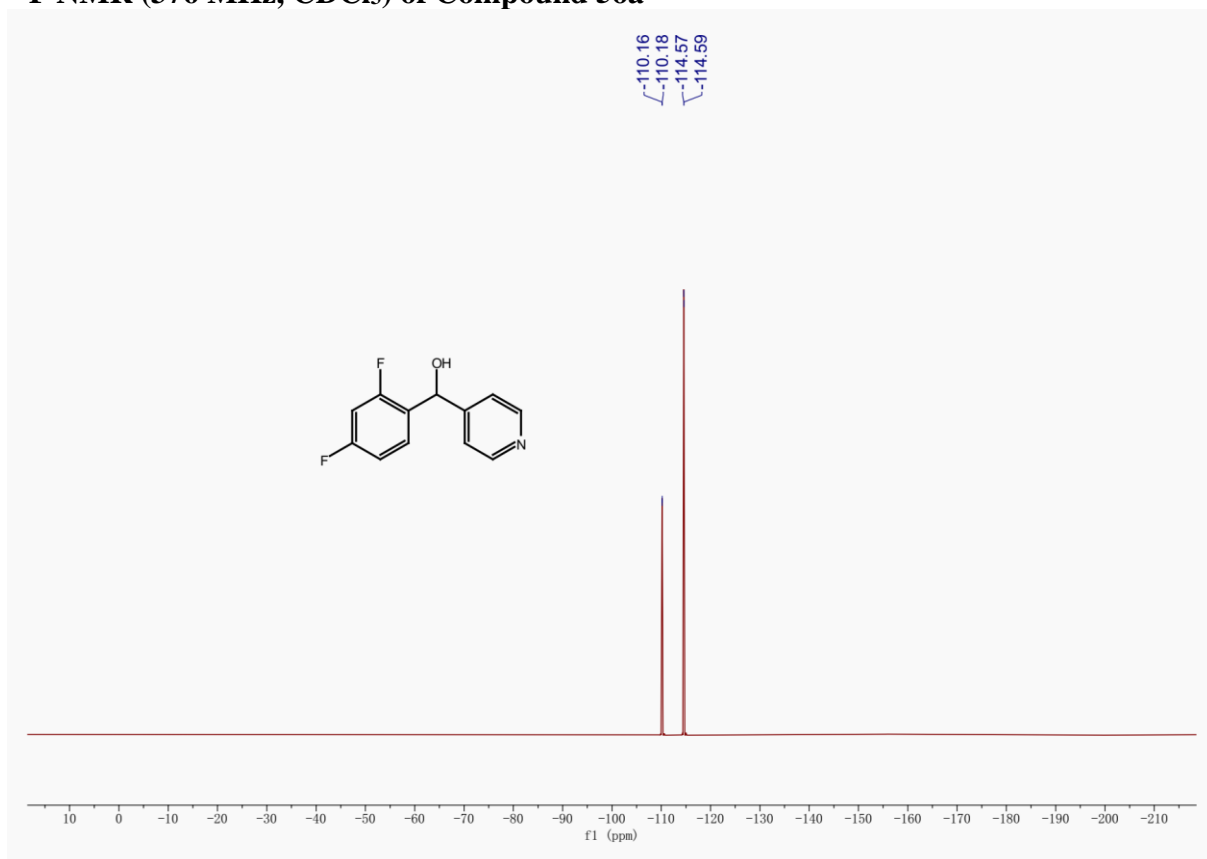



### $^1\text{H}$ NMR (400 MHz, $\text{CDCl}_3$ ) of Compound 5pa

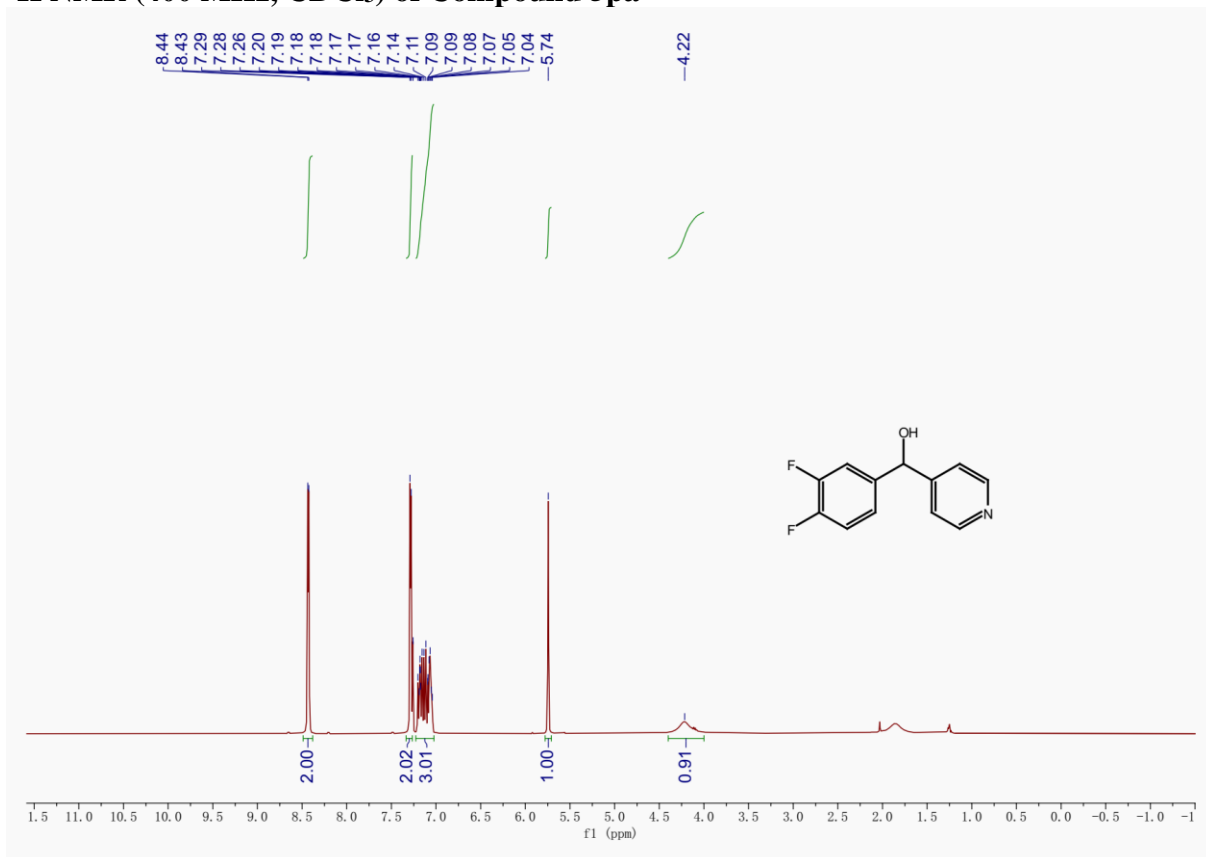

### $^{13}\text{C}\{^1\text{H}\}$ NMR (101 MHz, $\text{CDCl}_3$ ) of Compound 5pa

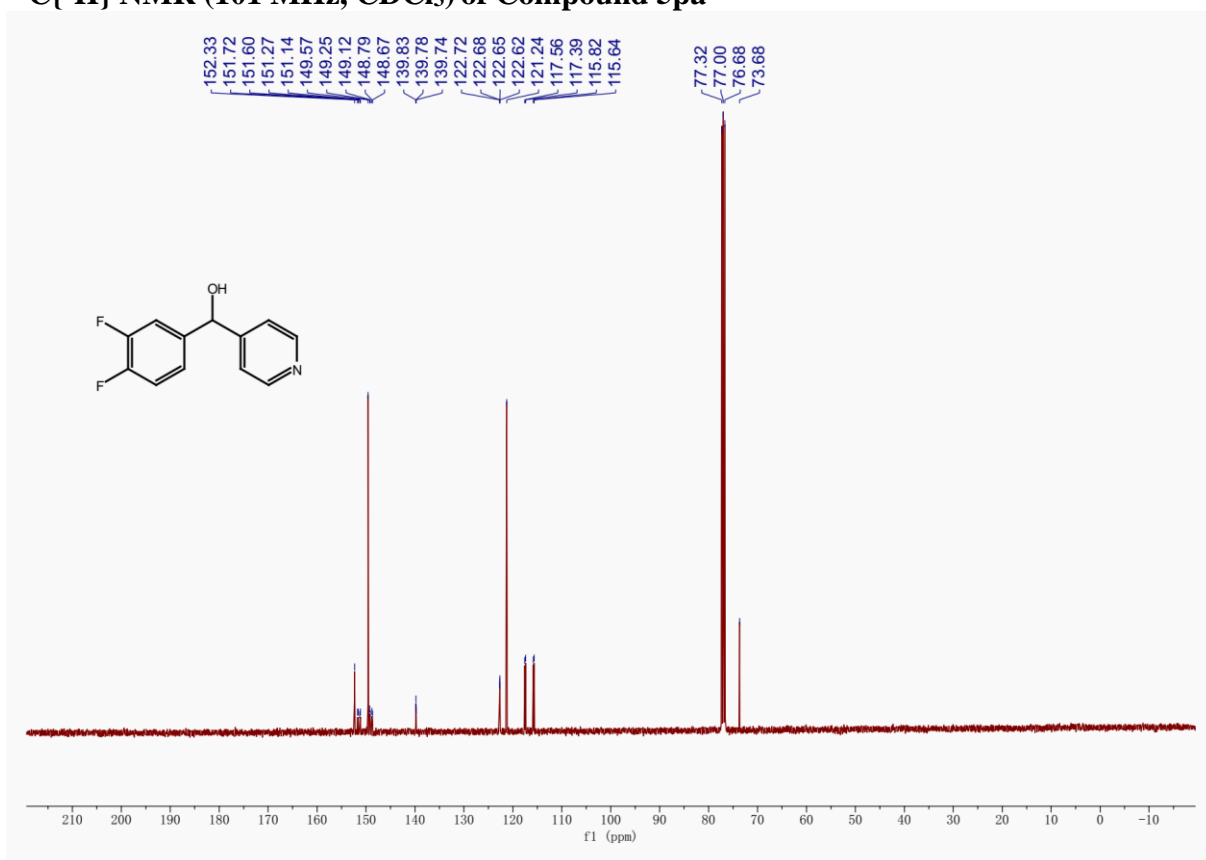

**<sup>19</sup>F NMR (376 MHz, CDCl<sub>3</sub>) of Compound 5pa**

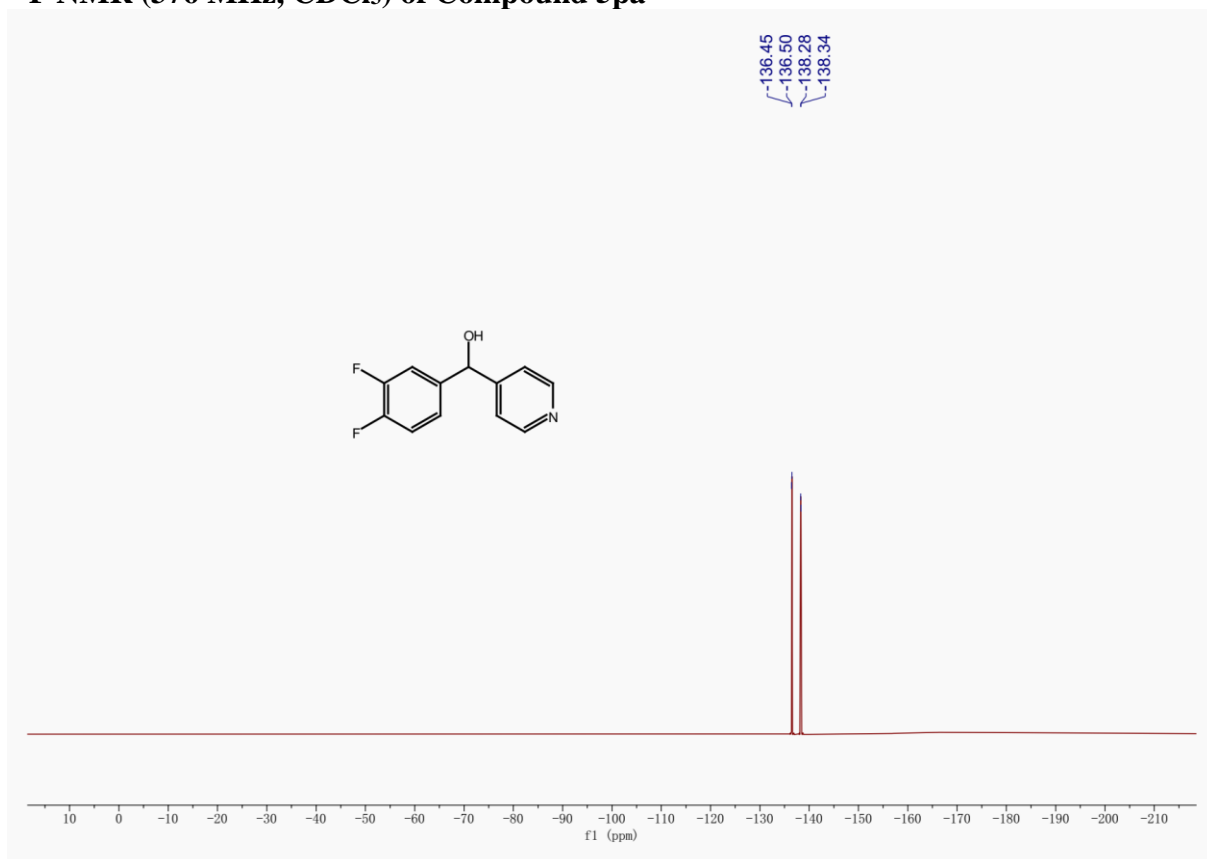

### $^1\text{H}$ NMR (400 MHz, $\text{CDCl}_3$ ) of Compound 5qa

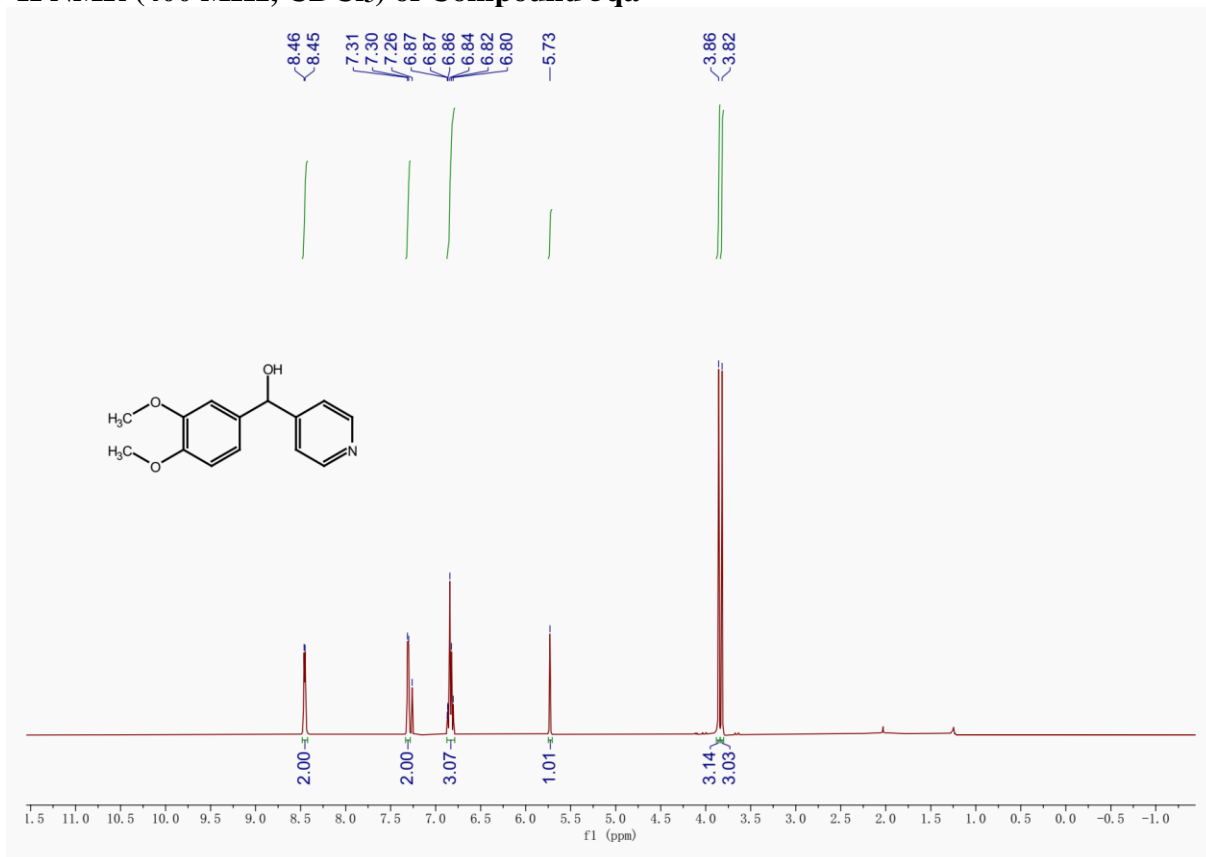

### $^{13}\text{C}\{^1\text{H}\}$ NMR (101 MHz, $\text{CDCl}_3$ ) of Compound 5qa

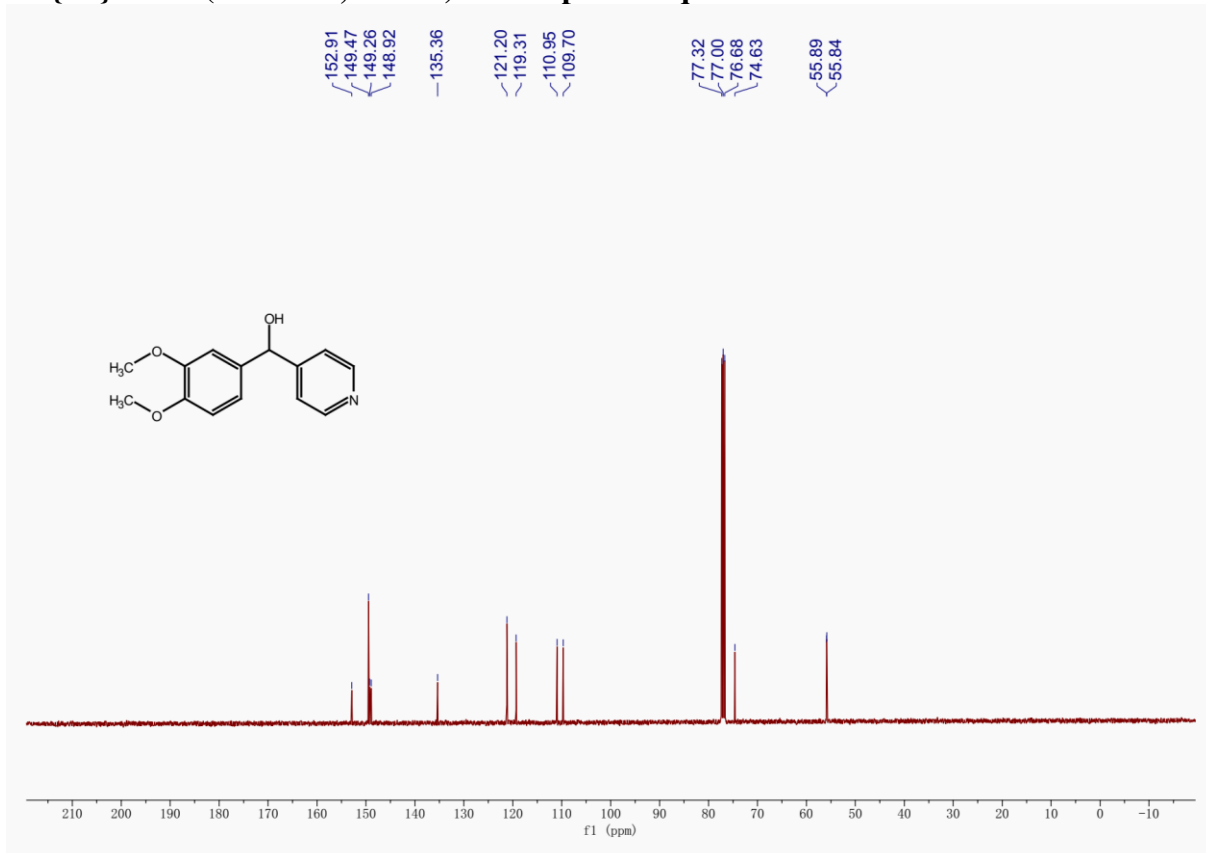

### $^1\text{H}$ NMR (400 MHz, $\text{CDCl}_3$ ) of Compound 5ra

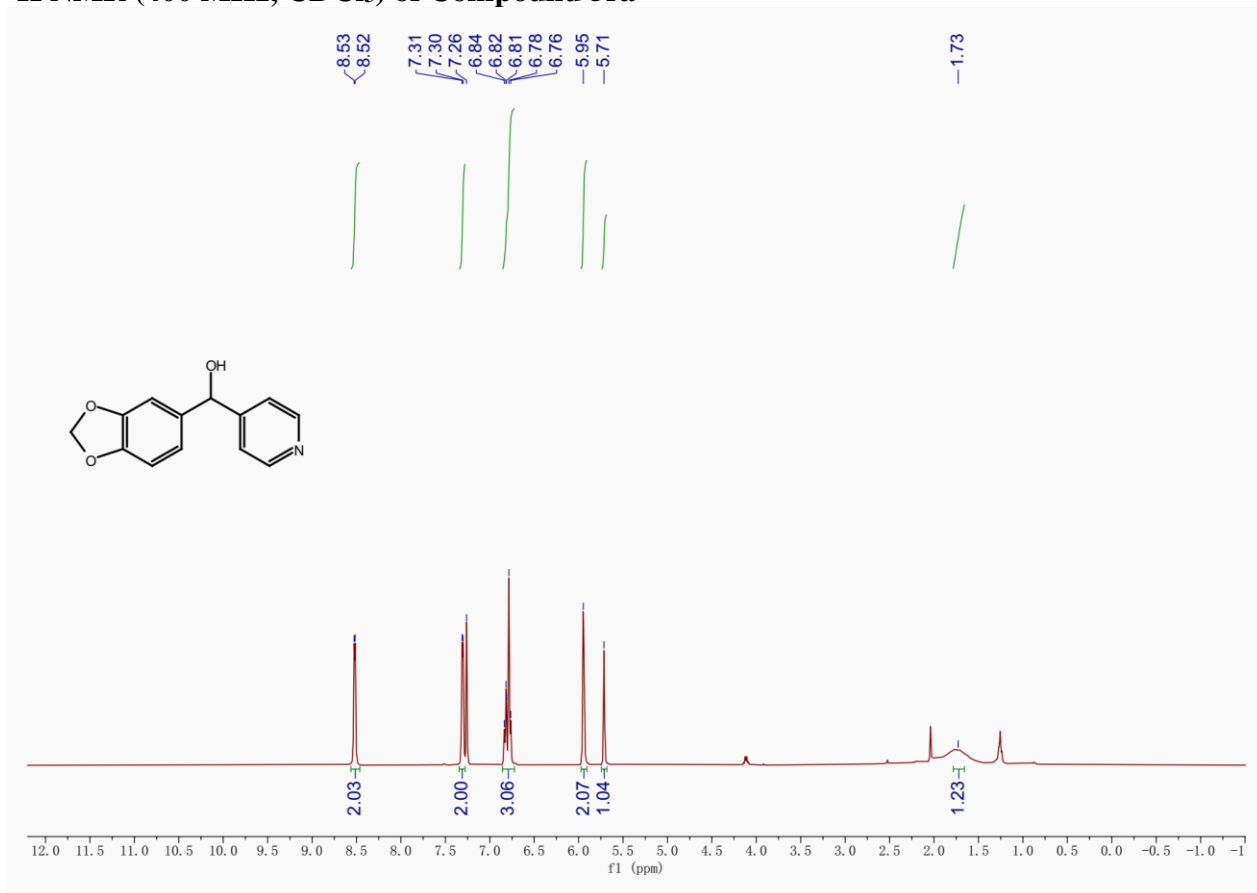

### $^{13}\text{C}\{^1\text{H}\}$ NMR (101 MHz, $\text{CDCl}_3$ ) of Compound 5ra

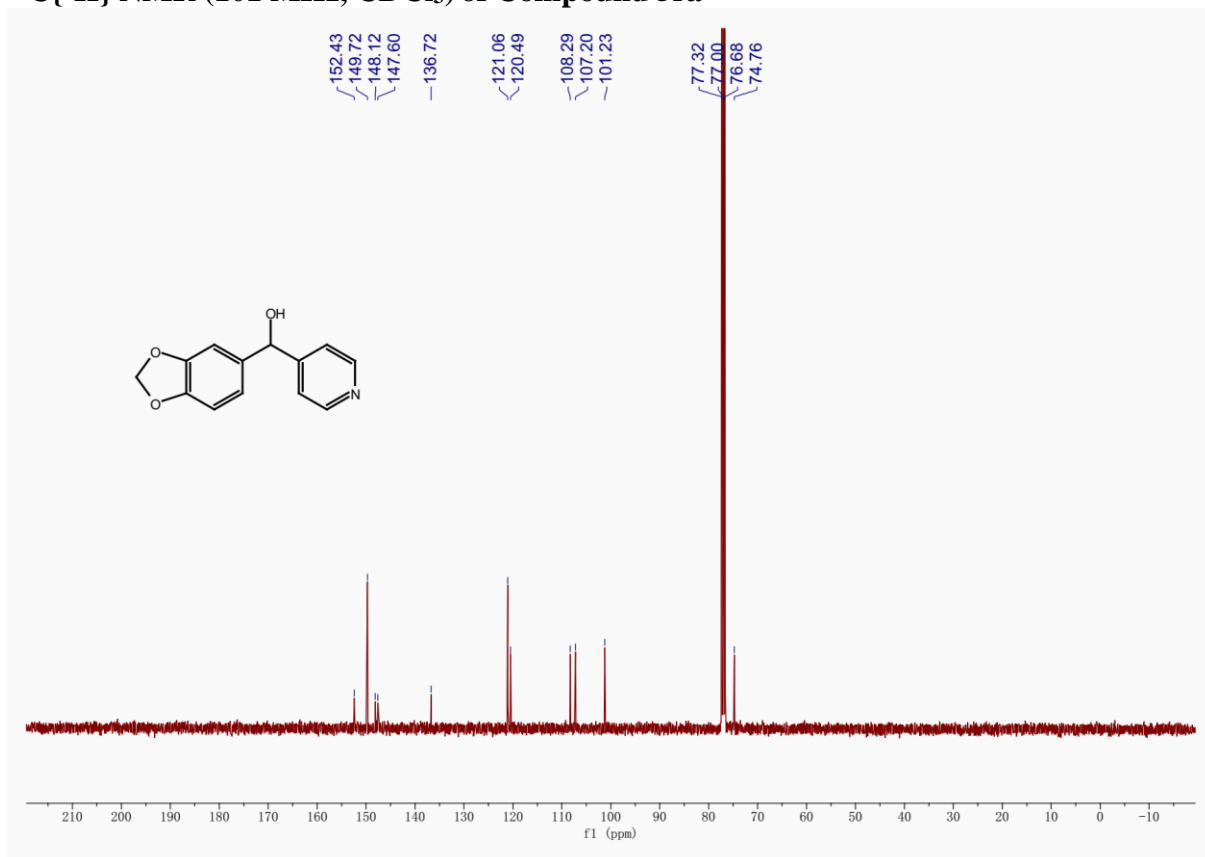

### $^1\text{H}$ NMR (400 MHz, $\text{CDCl}_3$ ) of Compound 5sa

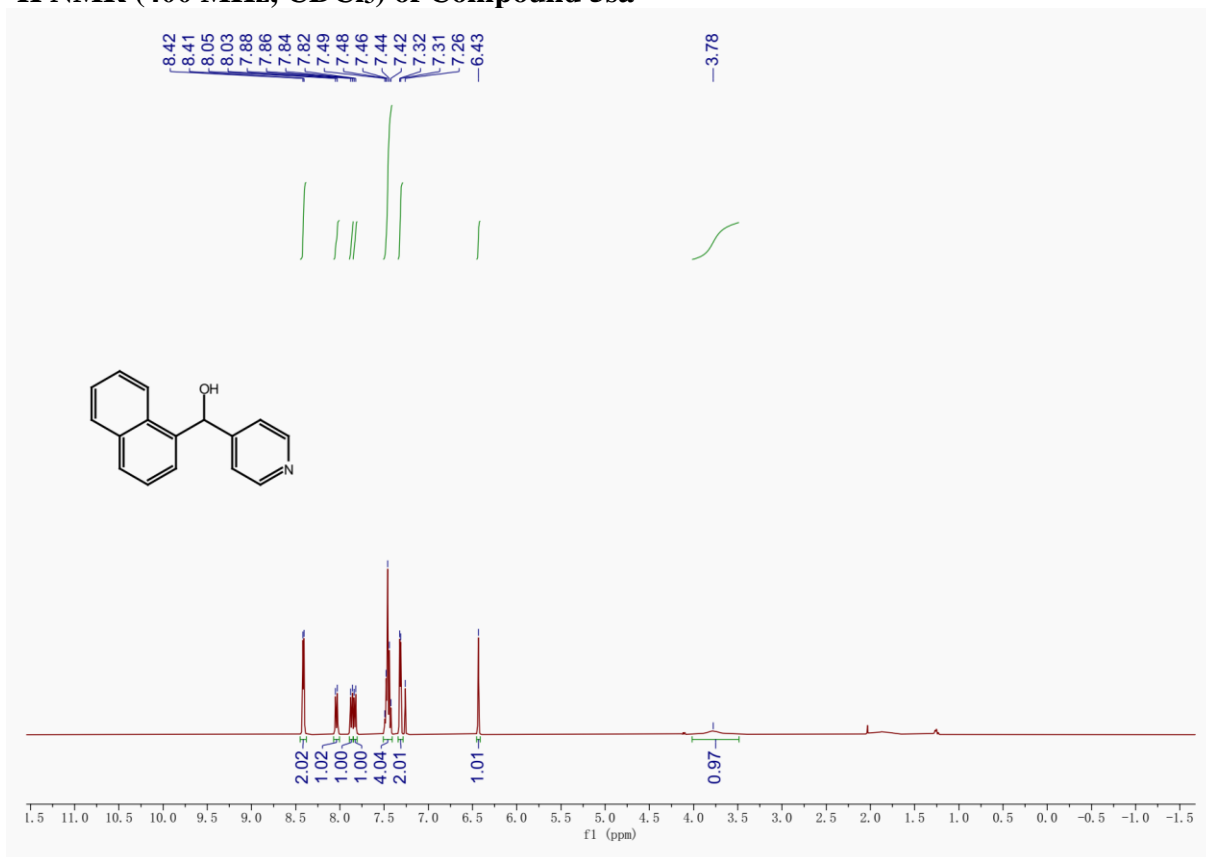

### $^{13}\text{C}\{^1\text{H}\}$ NMR (101 MHz, $\text{CDCl}_3$ ) of Compound 5sa

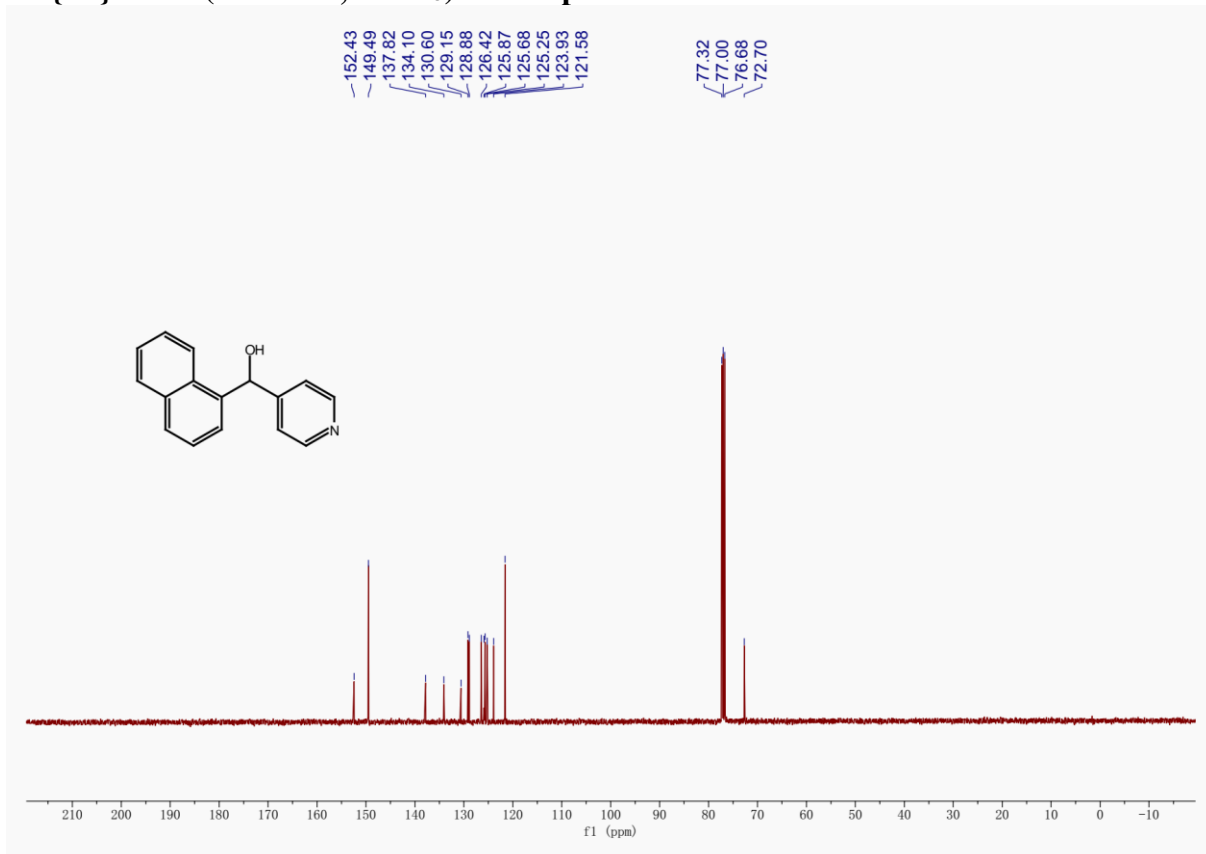

### $^1\text{H}$ NMR (400 MHz, $\text{CDCl}_3$ ) of Compound 5ta

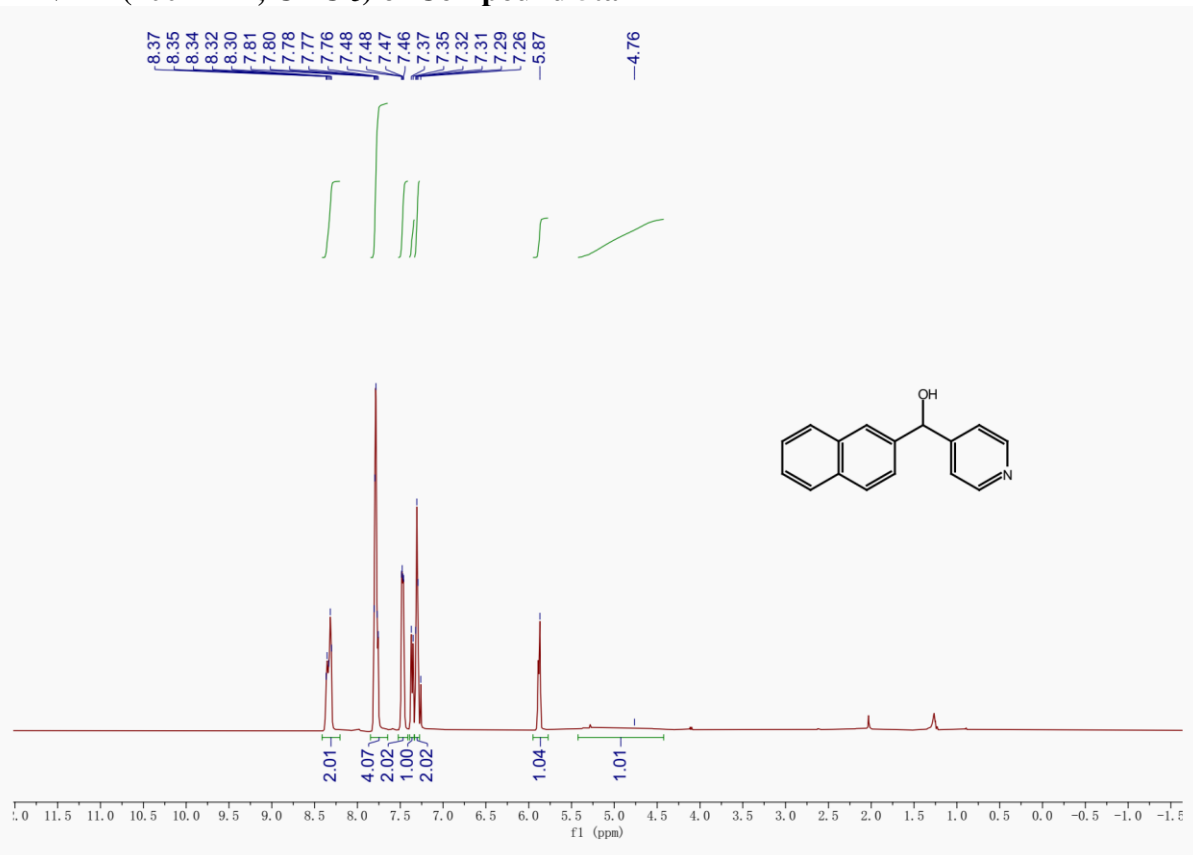

### $^{13}\text{C}\{^1\text{H}\}$ NMR (101 MHz, $\text{CDCl}_3$ ) of Compound 5ta

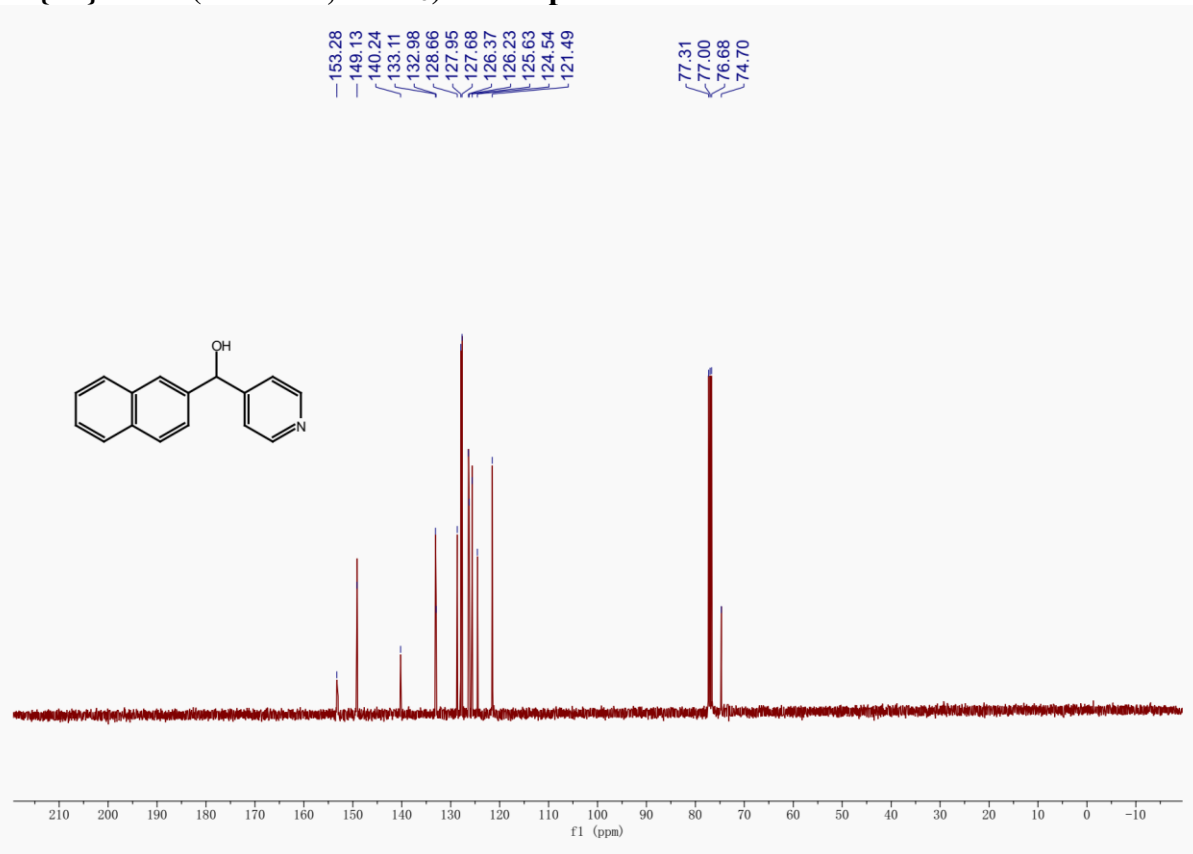

**<sup>1</sup>H NMR (400 MHz, CDCl<sub>3</sub>) of Compound 5ua**

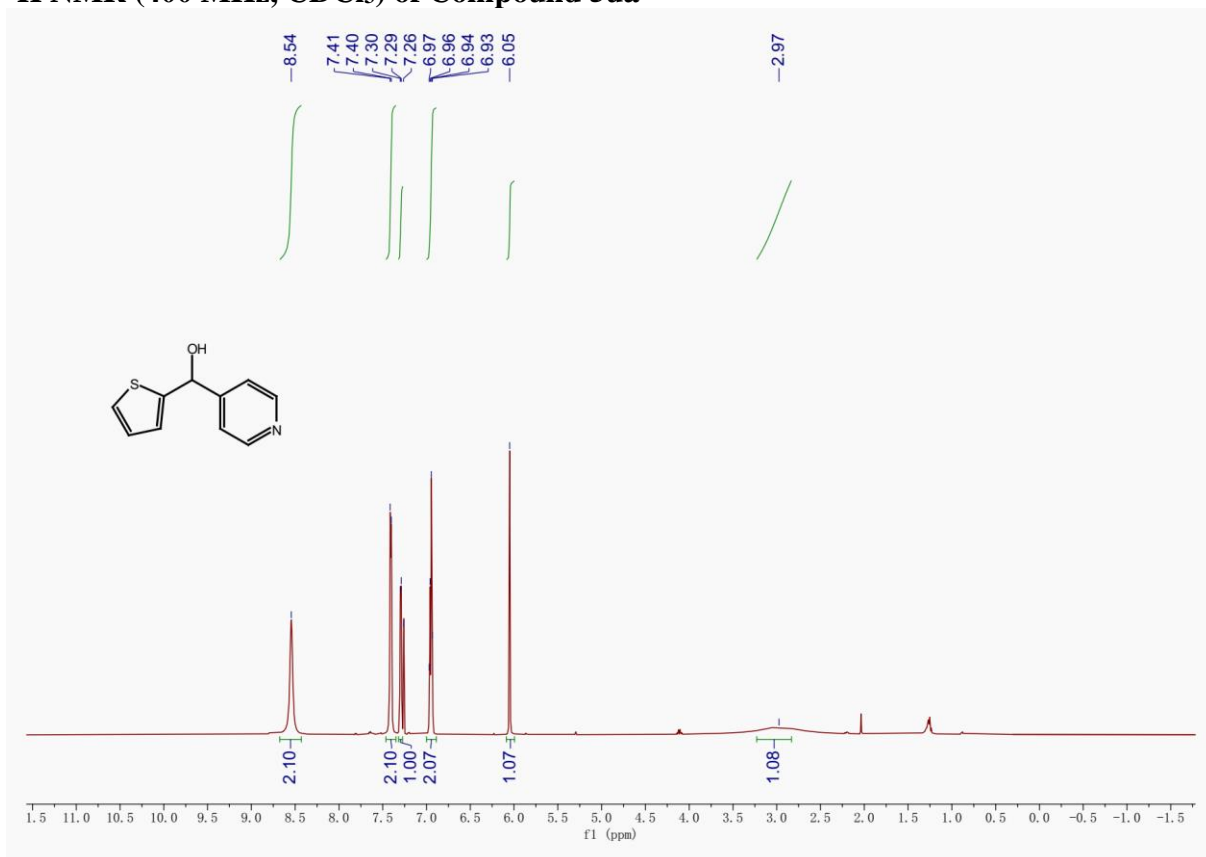

**<sup>13</sup>C{<sup>1</sup>H} NMR (101 MHz, CDCl<sub>3</sub>) of Compound 5ua**

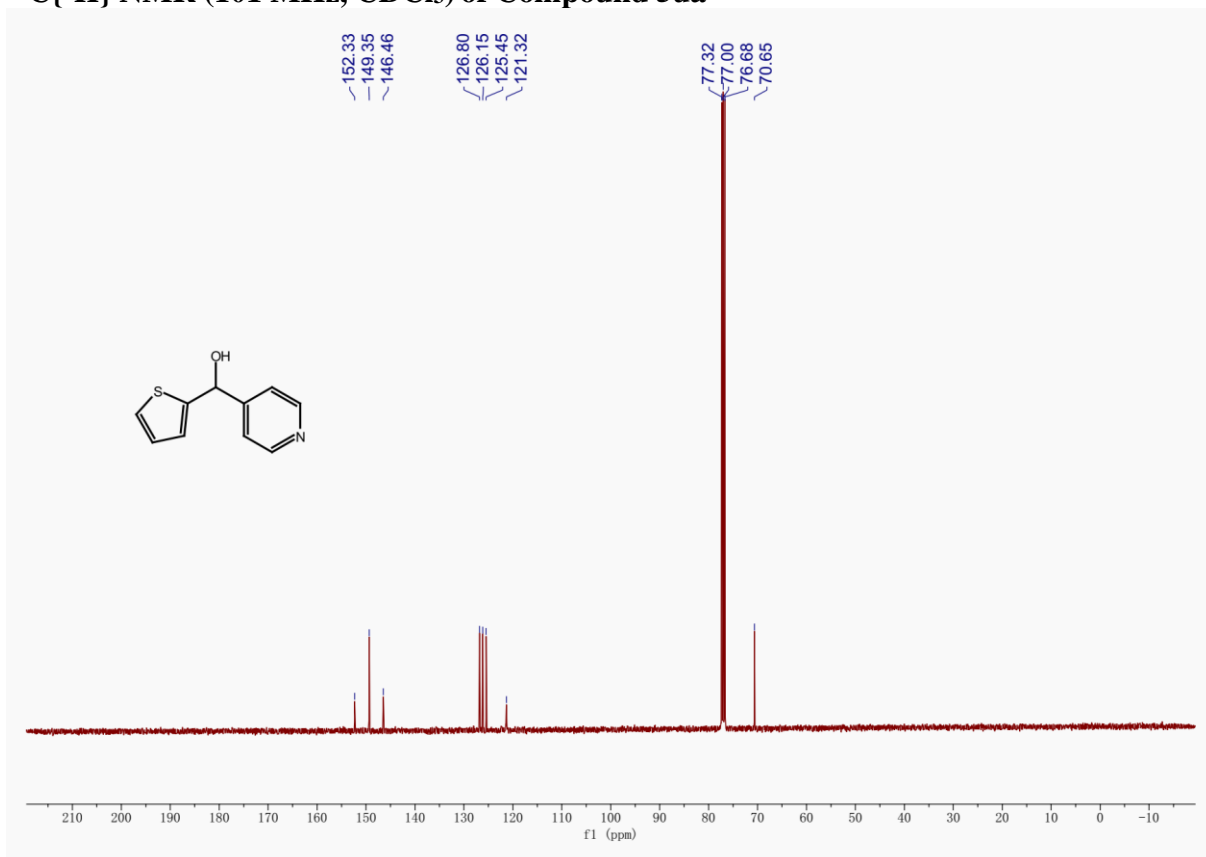

**<sup>1</sup>H NMR (400 MHz, CDCl<sub>3</sub>) of Compound 5va**

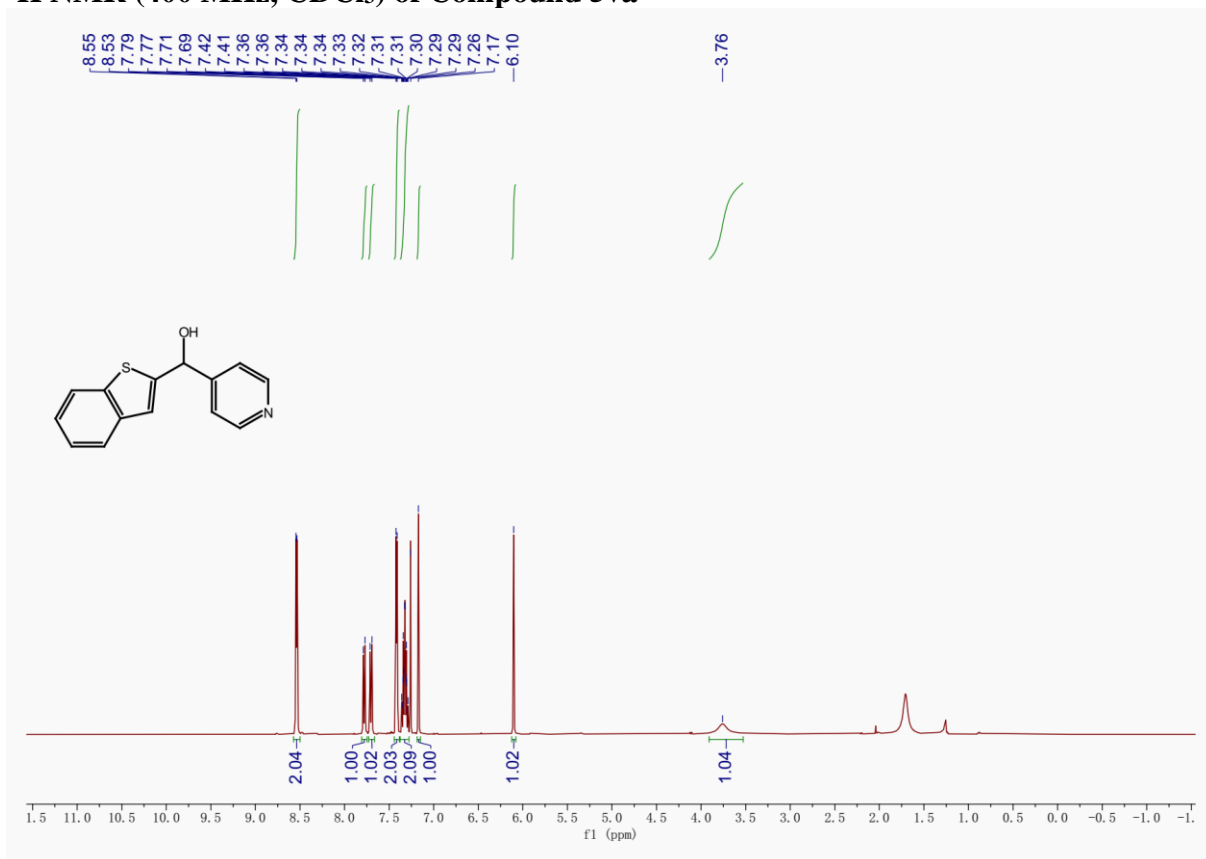

**<sup>13</sup>C{<sup>1</sup>H} NMR (101 MHz, CDCl<sub>3</sub>) of Compound 5va**

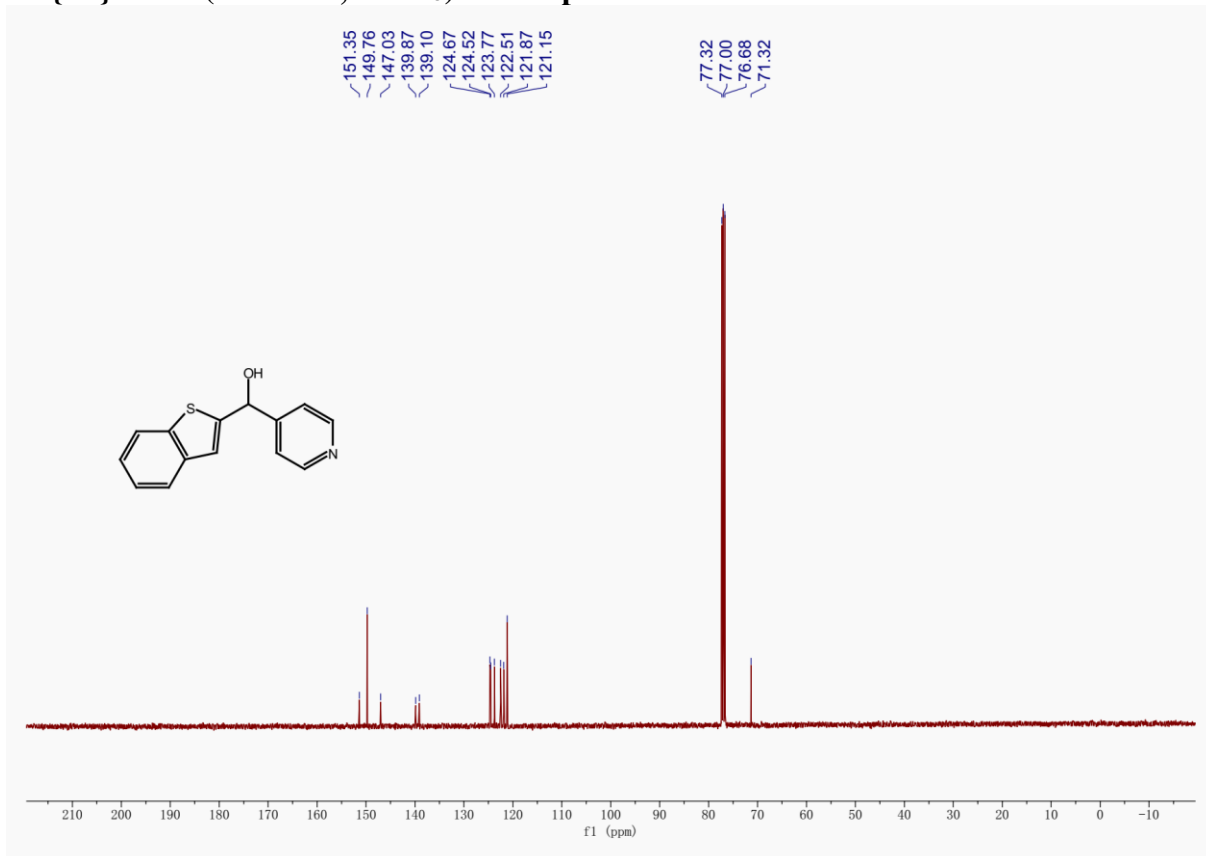



**<sup>1</sup>H NMR (400 MHz, CDCl<sub>3</sub>) of Compound 5ab**

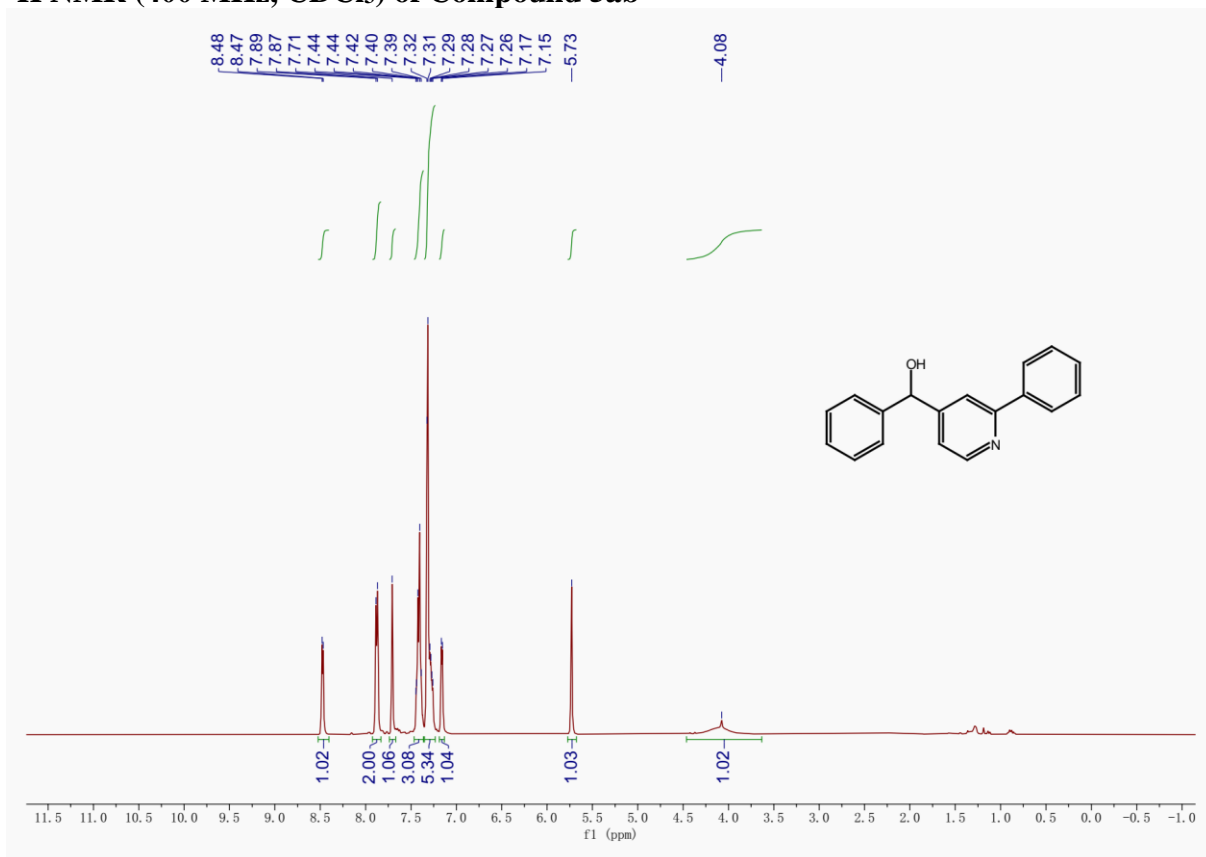

**<sup>13</sup>C{<sup>1</sup>H} NMR (101 MHz, CDCl<sub>3</sub>) of Compound 5ab**

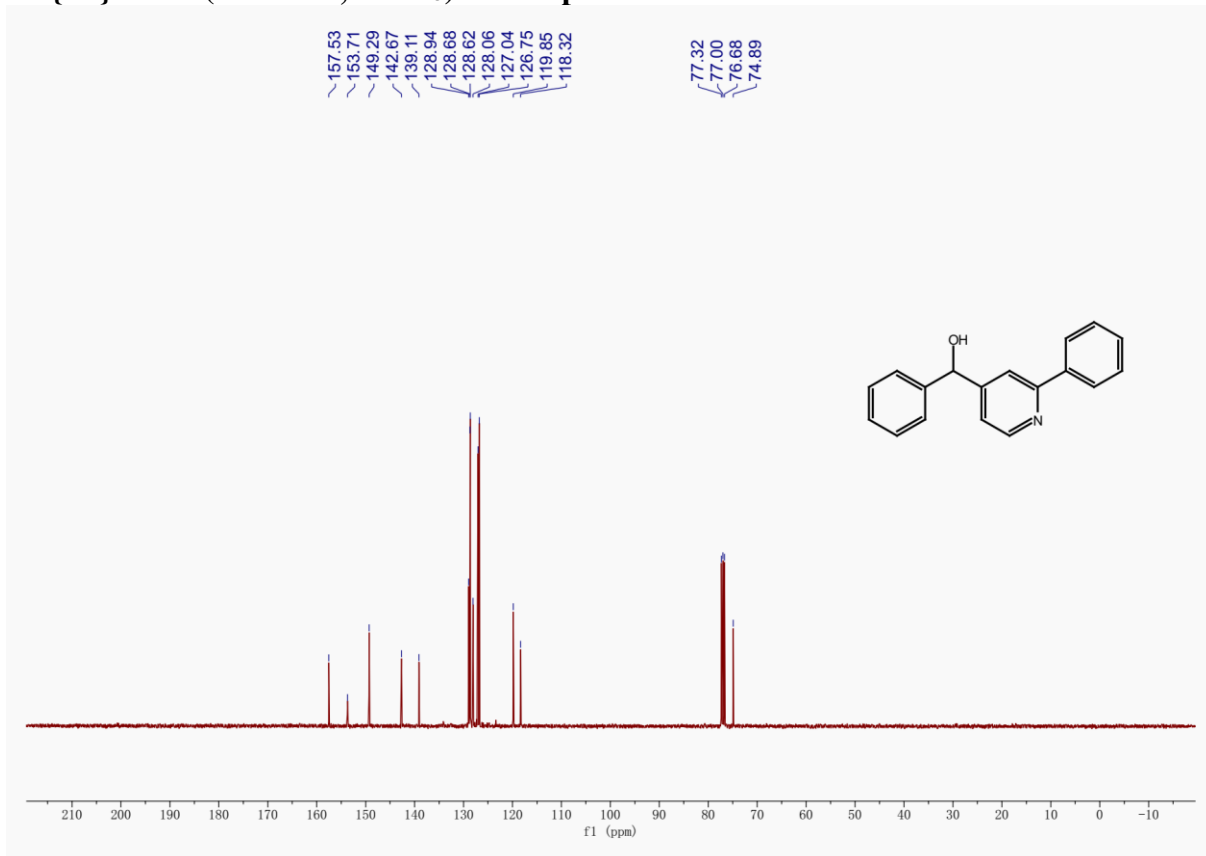

### <sup>1</sup>H NMR (400 MHz, CDCl<sub>3</sub>) of Compound 5ac

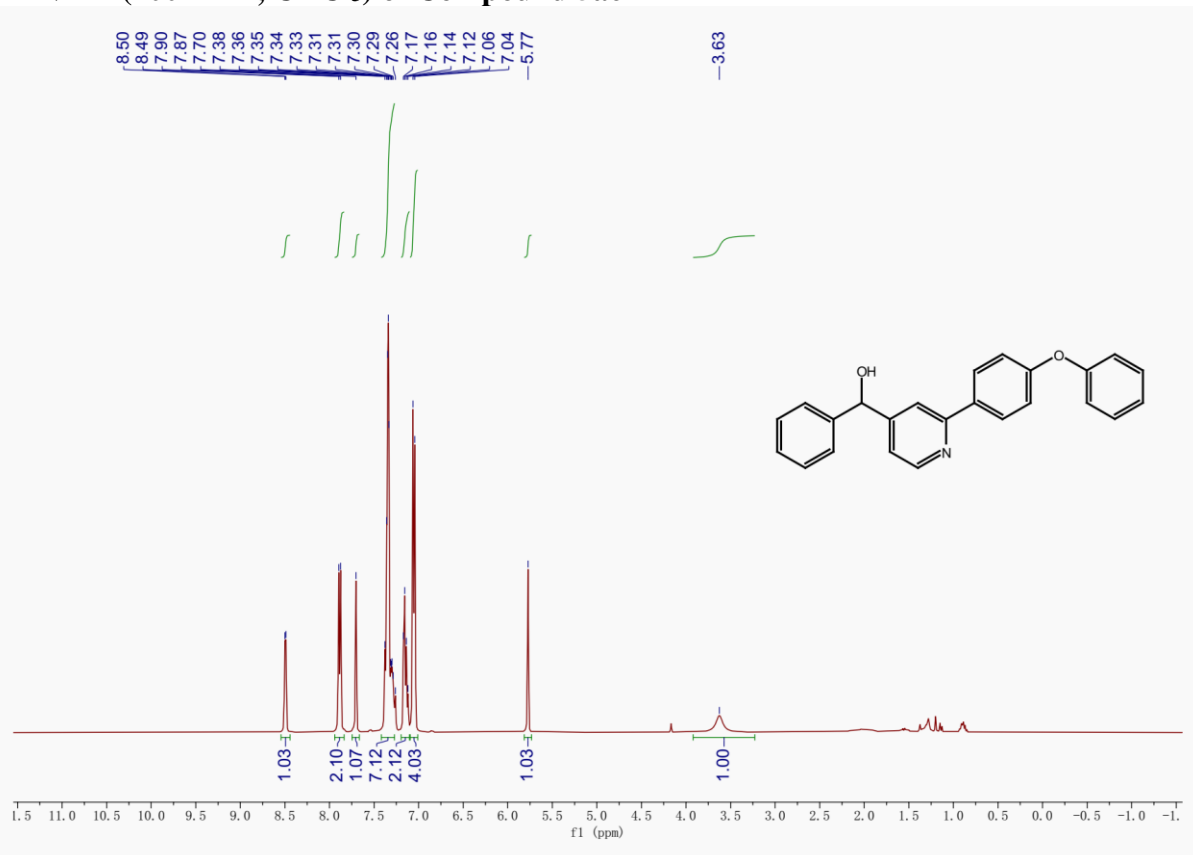

### <sup>13</sup>C{<sup>1</sup>H} NMR (101 MHz, CDCl<sub>3</sub>) of Compound 5ac

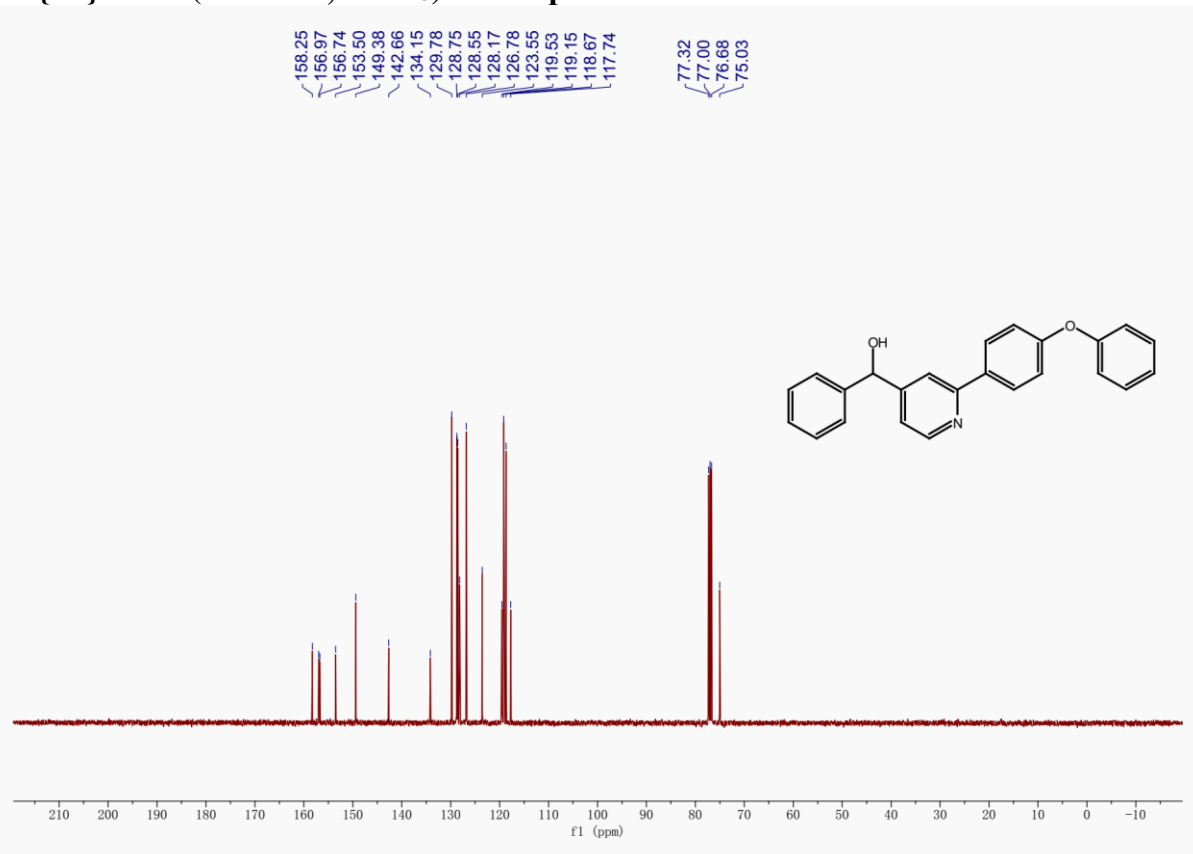

### $^1\text{H}$ NMR (400 MHz, $\text{CDCl}_3$ ) of Compound 5ad

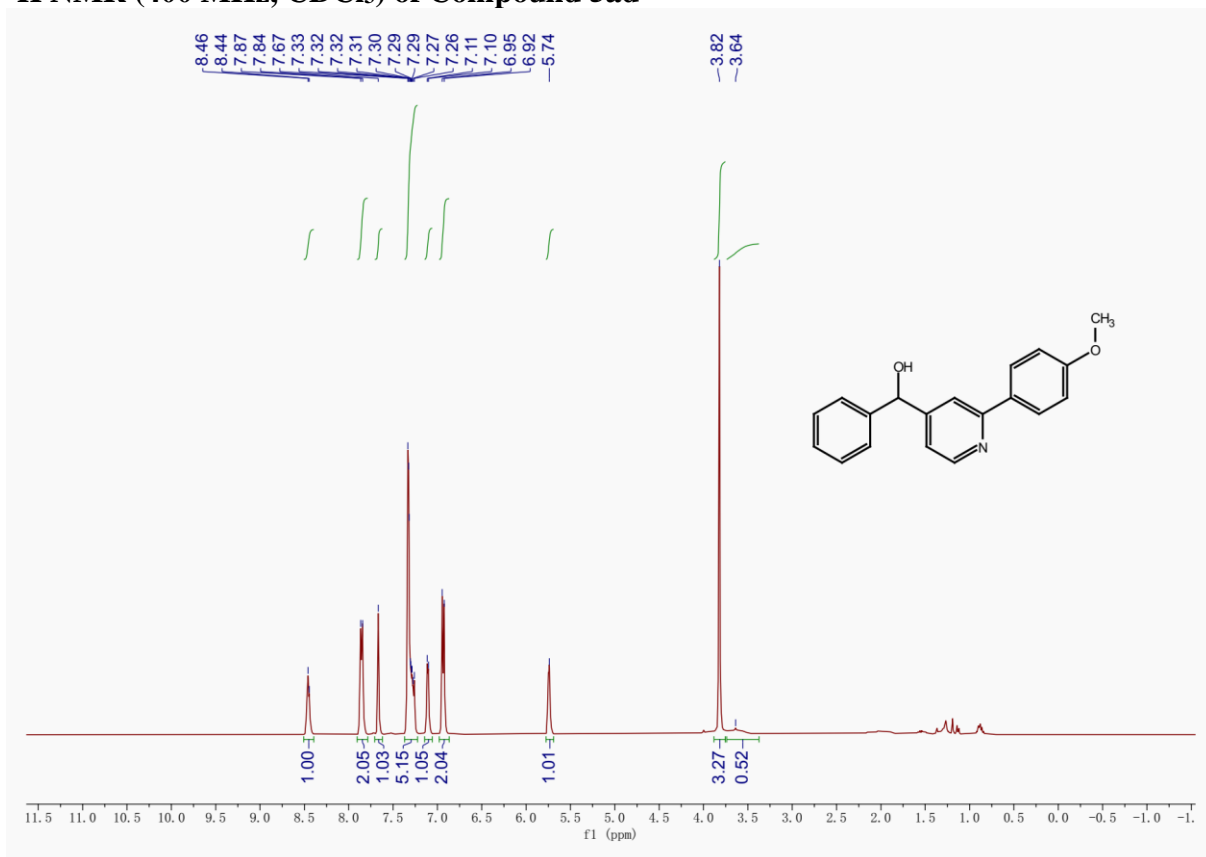

### $^{13}\text{C}\{^1\text{H}\}$ NMR (101 MHz, $\text{CDCl}_3$ ) of Compound 5ad

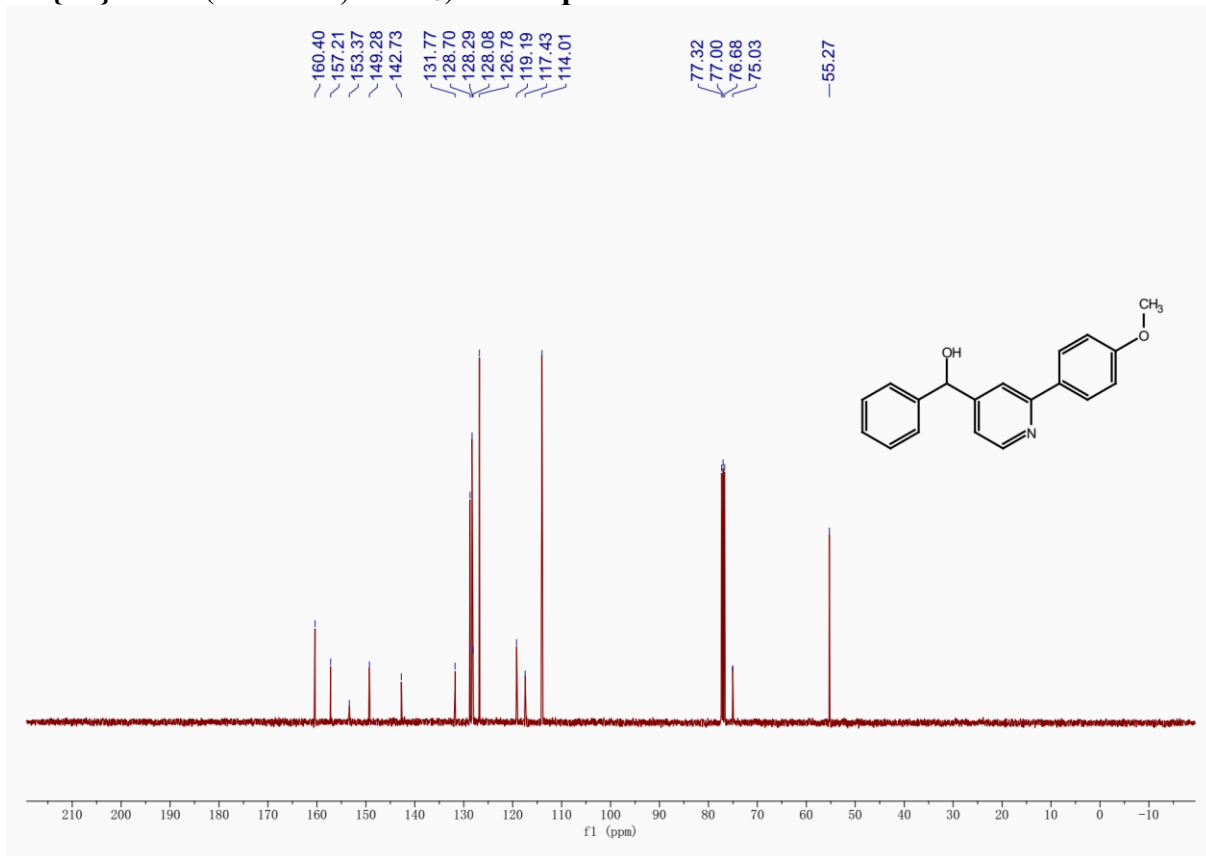

**<sup>1</sup>H NMR (400 MHz, CDCl<sub>3</sub>) of Compound 5ae**

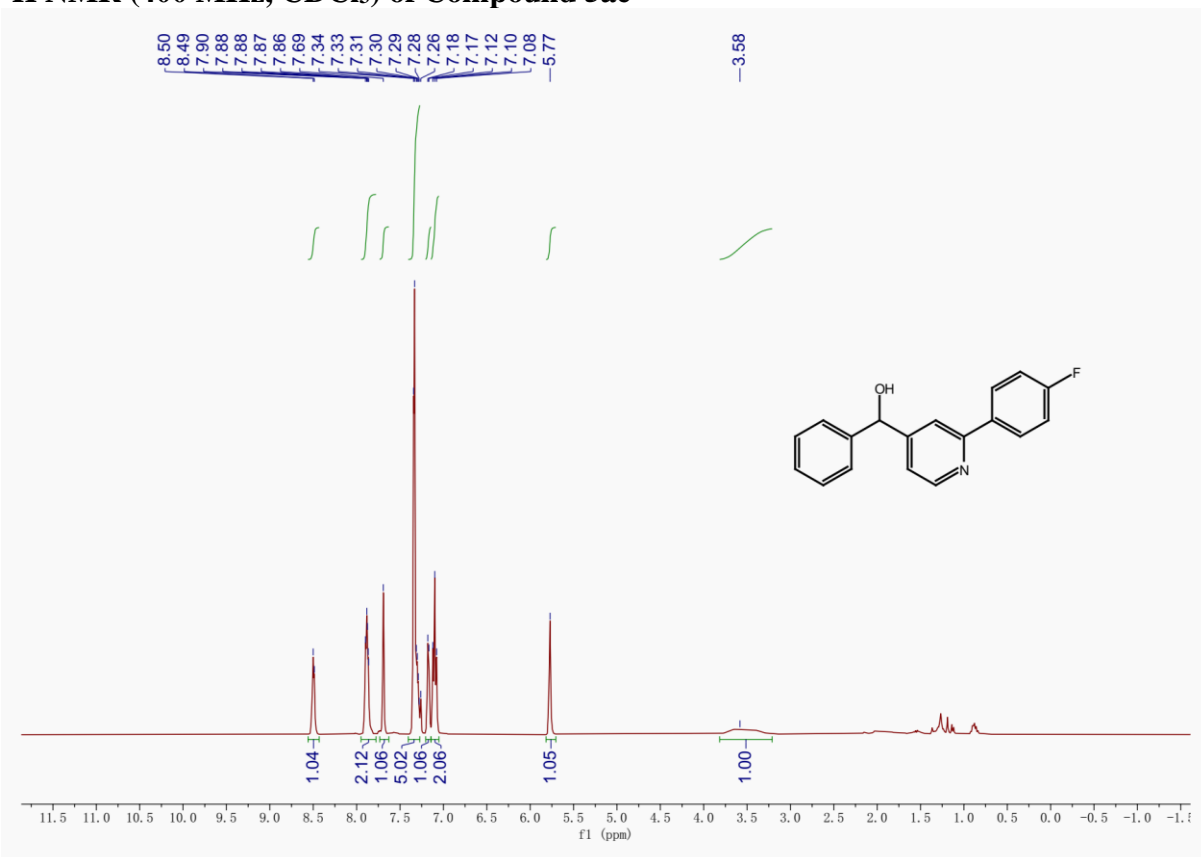

**<sup>13</sup>C{<sup>1</sup>H} NMR (101 MHz, CDCl<sub>3</sub>) of Compound 5ae**

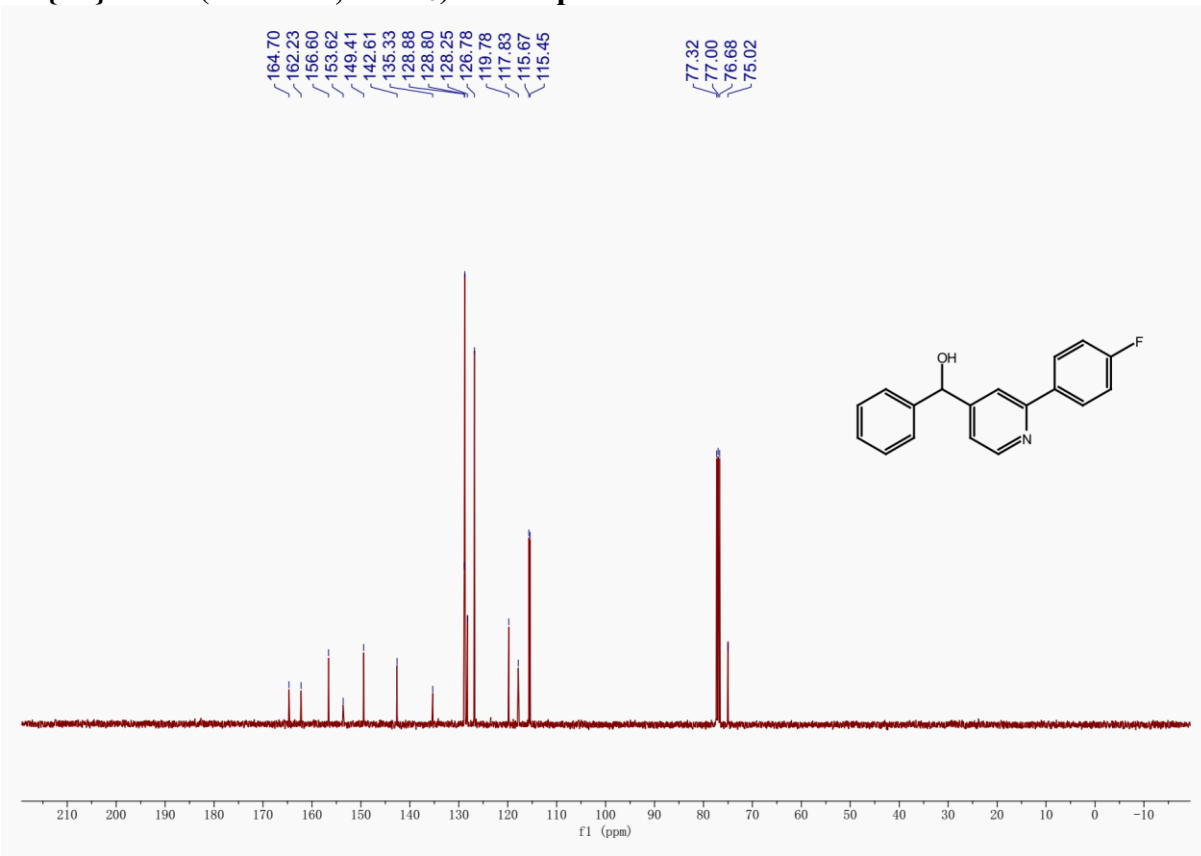

**<sup>19</sup>F NMR (376 MHz, CDCl<sub>3</sub>) of Compound 5ae**

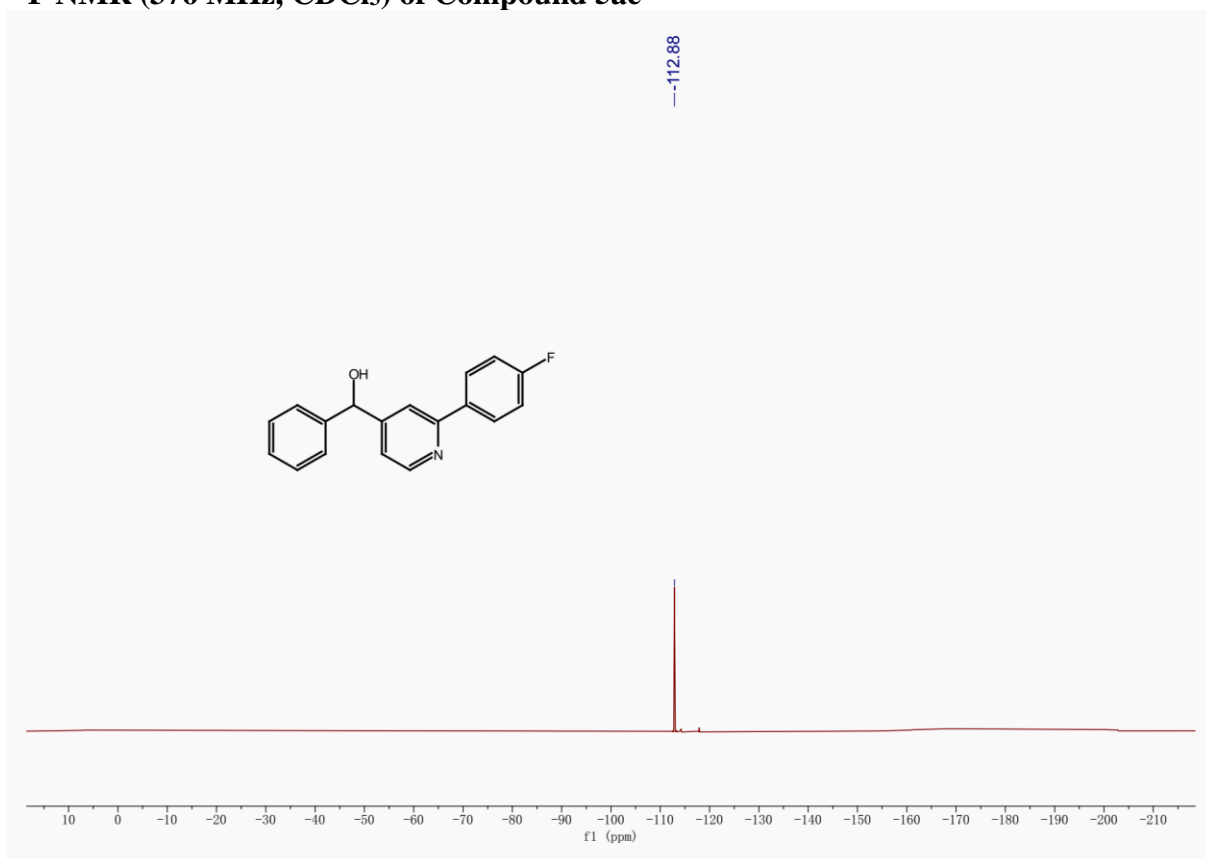

### $^1\text{H}$ NMR (400 MHz, $\text{CDCl}_3$ ) of Compound 5af

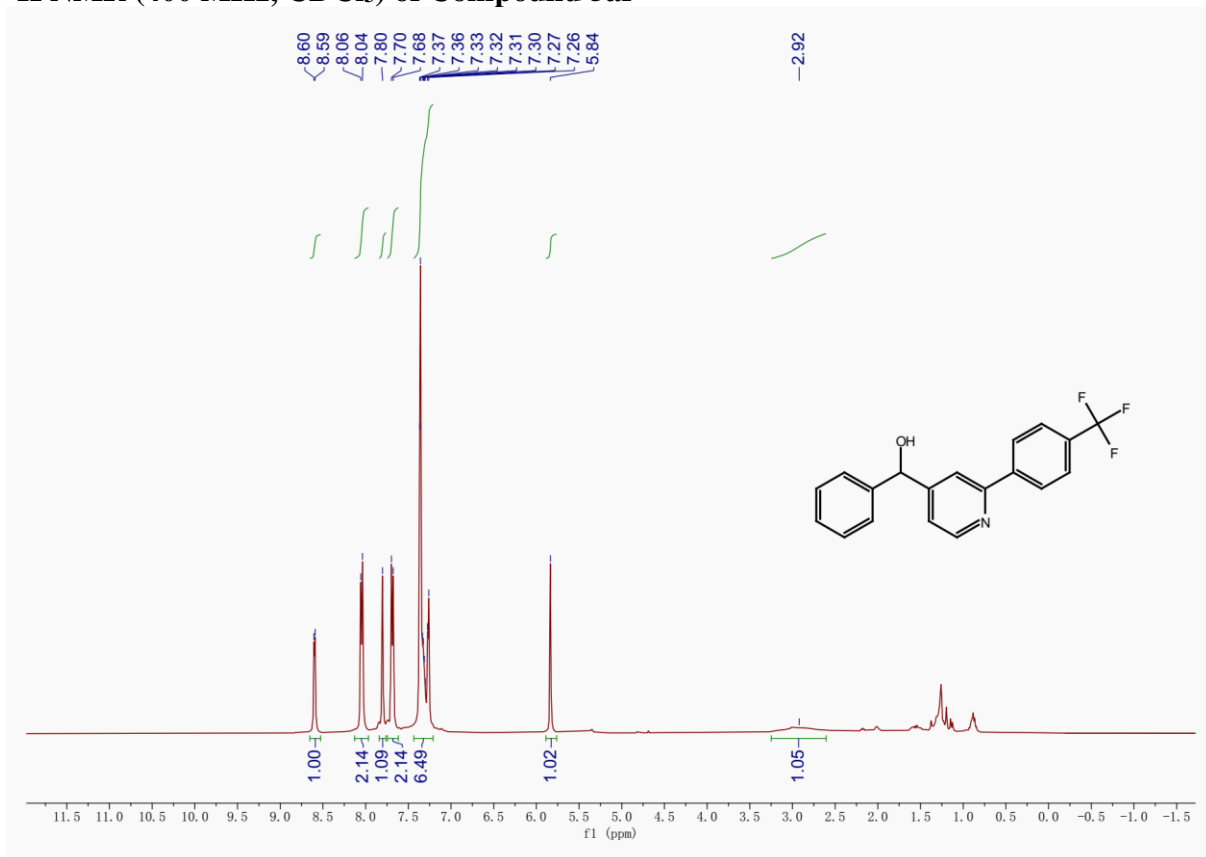

### $^{13}\text{C}\{^1\text{H}\}$ NMR (101 MHz, $\text{CDCl}_3$ ) of Compound 5af

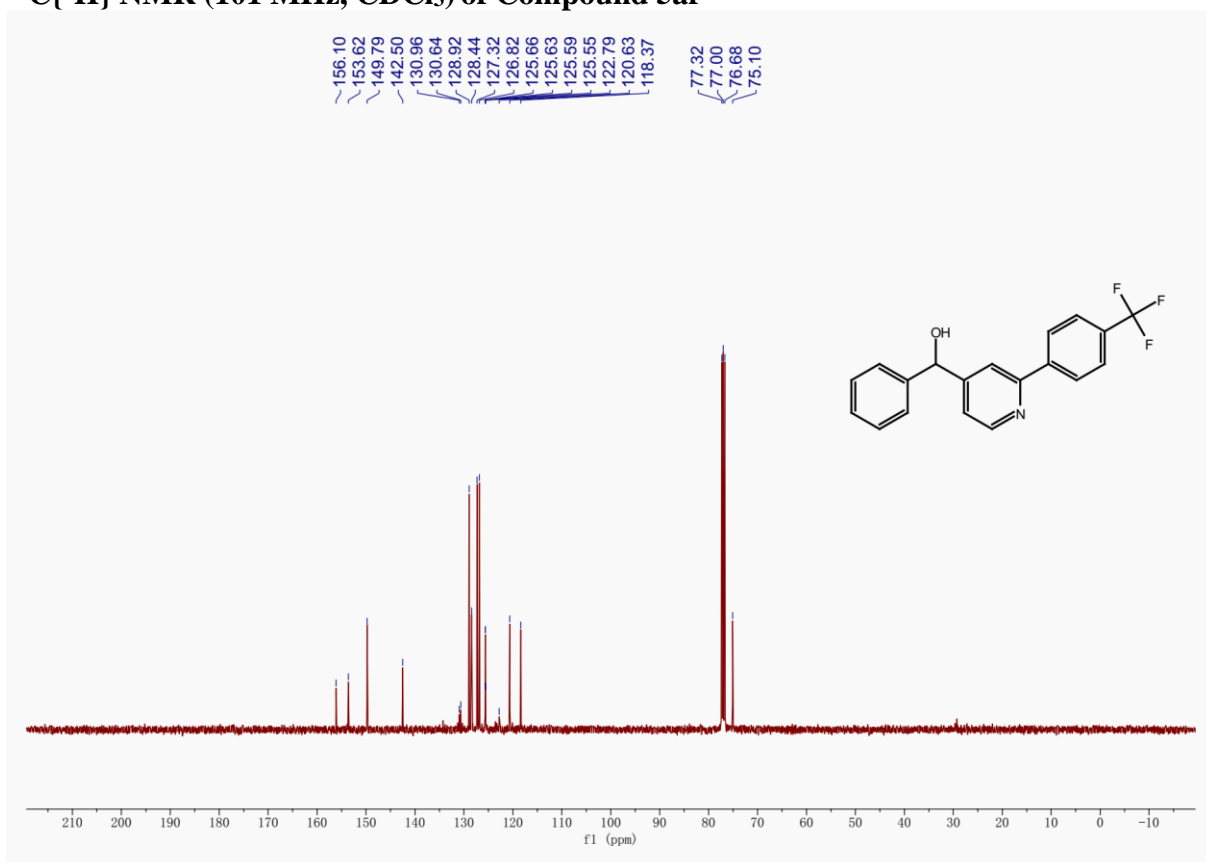

**<sup>19</sup>F NMR (376 MHz, CDCl<sub>3</sub>) of Compound 5af**

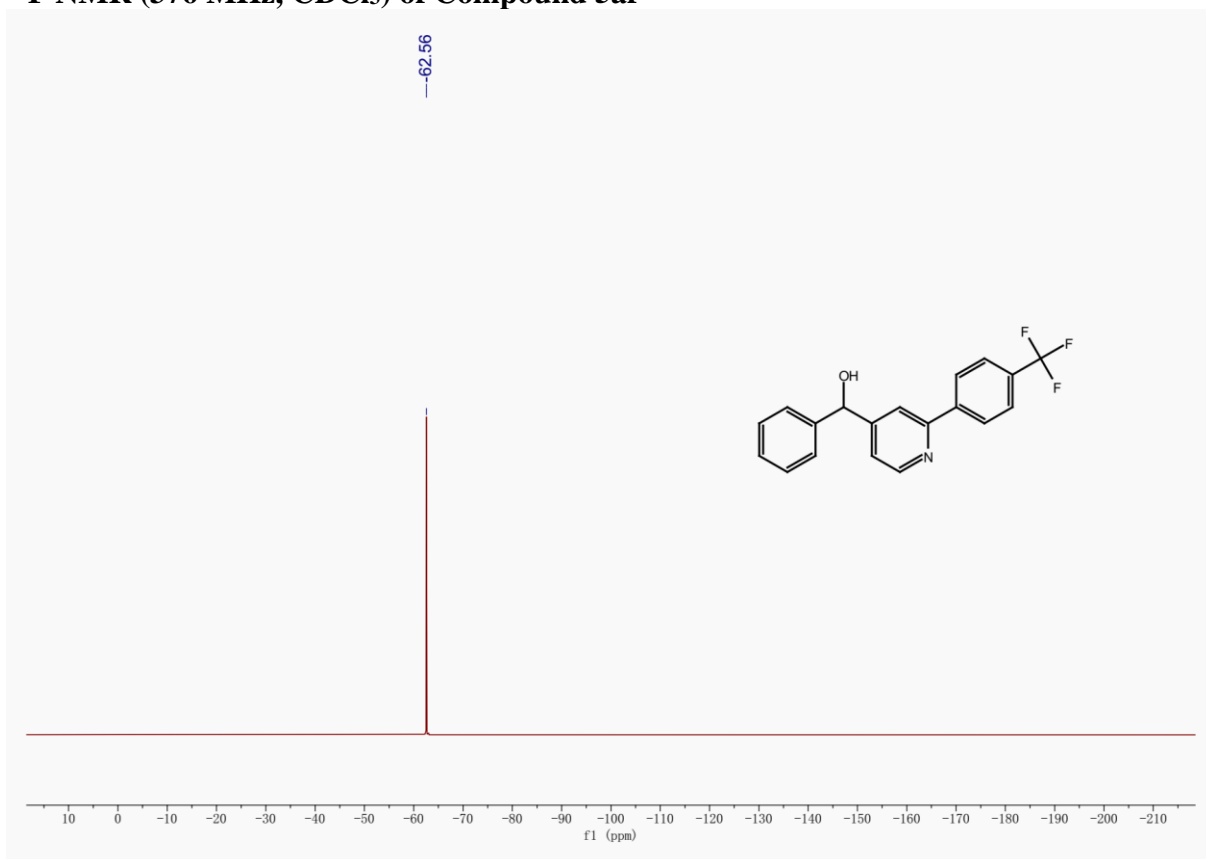

### $^1\text{H}$ NMR (400 MHz, $\text{CDCl}_3$ ) of Compound 5ag

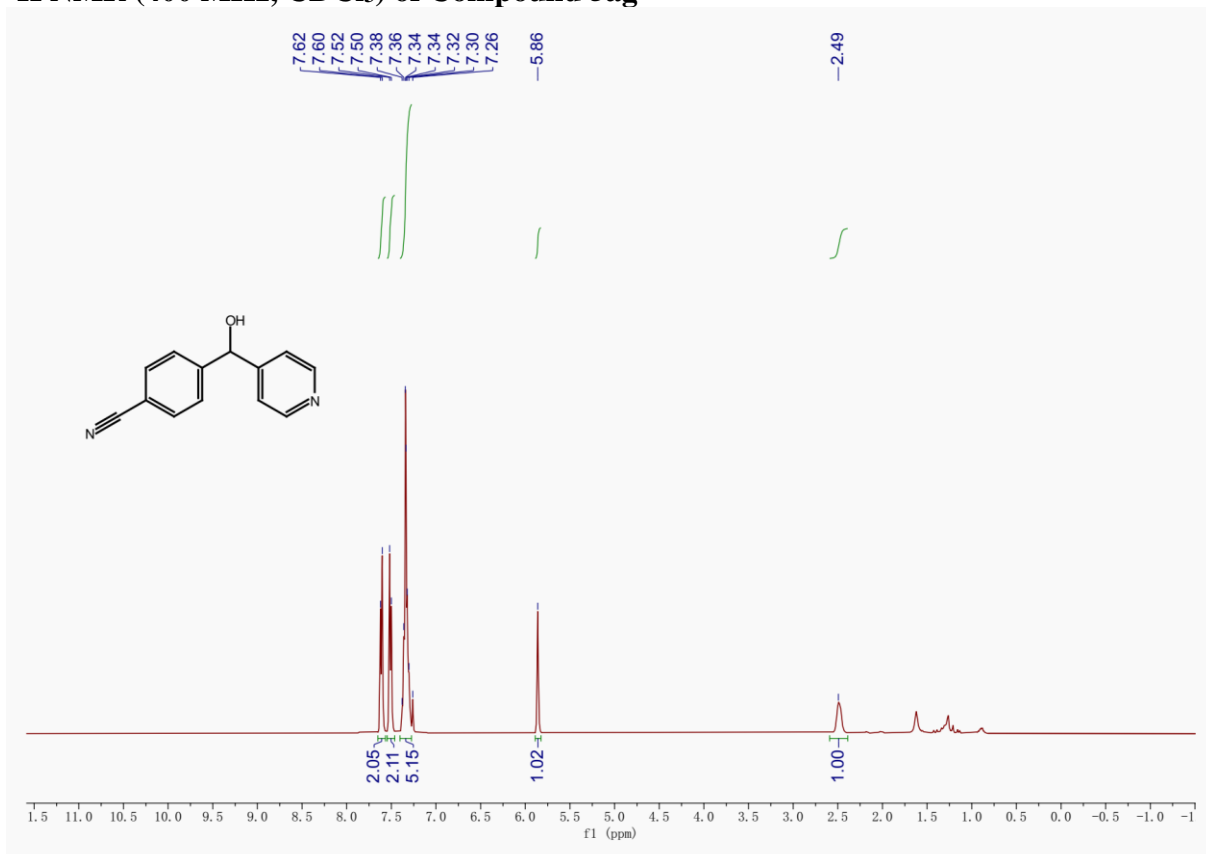

### $^{13}\text{C}\{^1\text{H}\}$ NMR (101 MHz, $\text{CDCl}_3$ ) of Compound 5ag

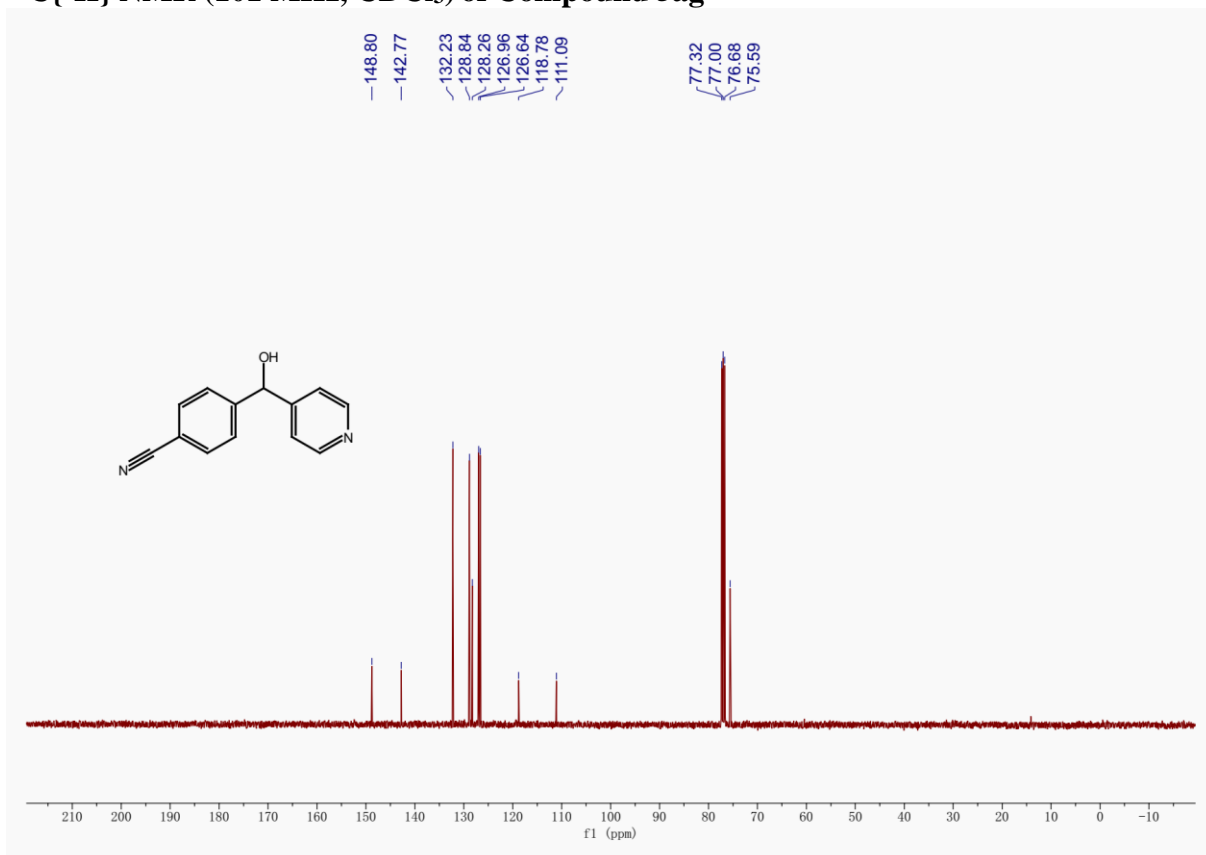



### $^1\text{H}$ NMR (400 MHz, $\text{CDCl}_3$ ) of Compound D-1a

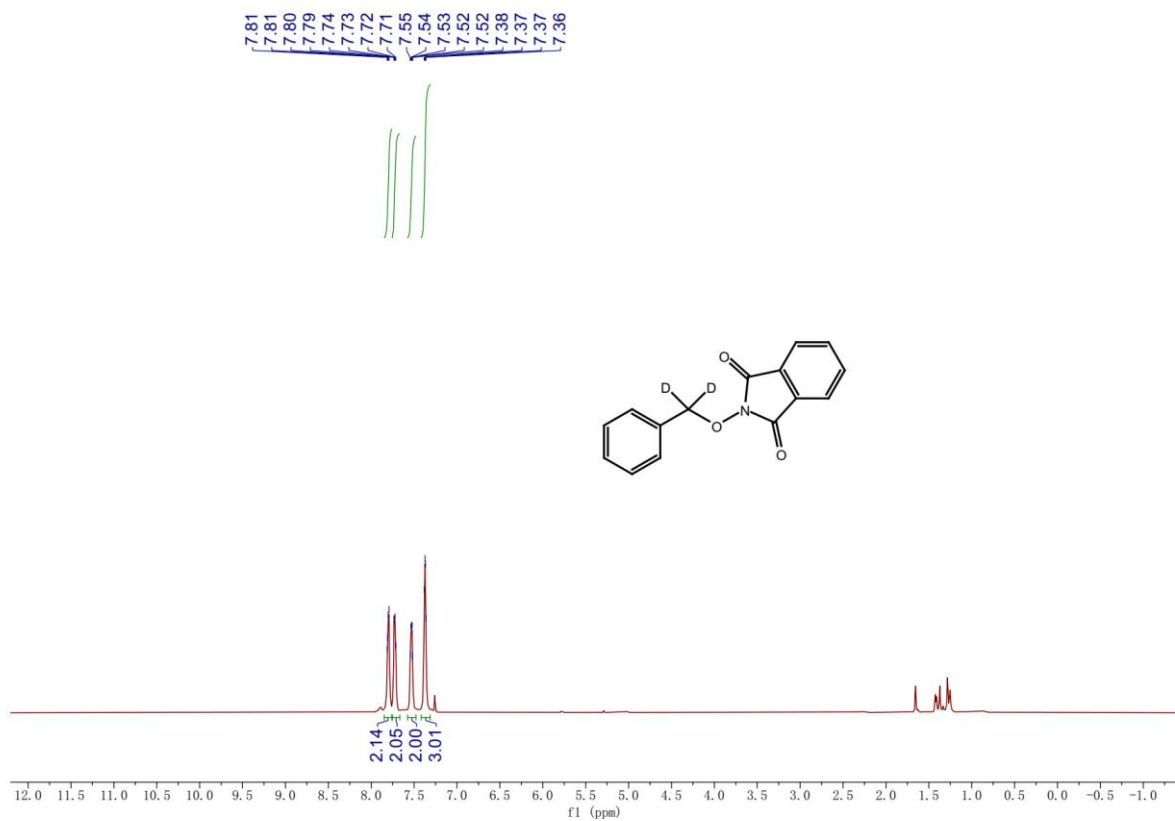

### $^{13}\text{C}\{^1\text{H}\}$ NMR (101 MHz, $\text{CDCl}_3$ ) of Compound D-1a

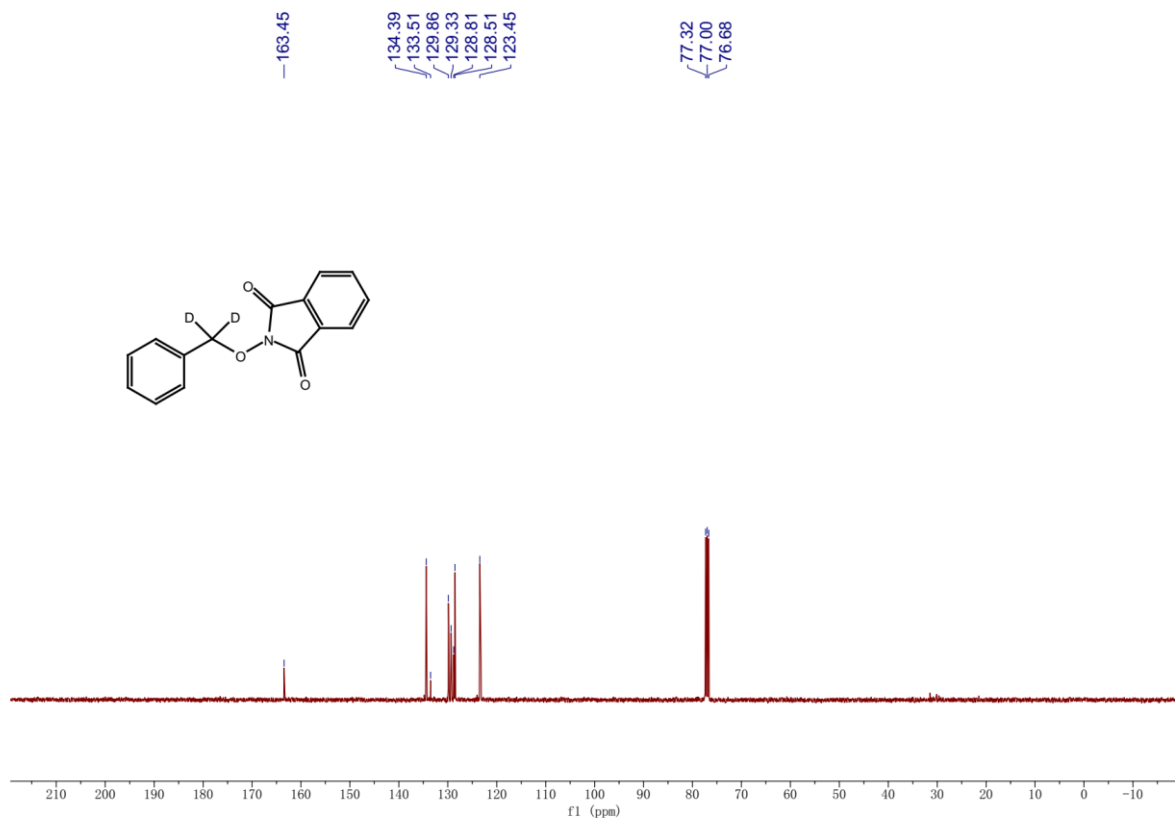

Supplement: d4qo01607f1.pdf [file d4qo01607f1.pdf]
